# Supplementary material for: Viral dark matter and virus–host interactions resolved from publicly available microbial genomes
Source: eLife. 2015 Jul 22;4:e08490. doi: 10.7554/eLife.08490 (PMC4533152; doi:10.7554/eLife.08490)
Supplement: Figure 1—source data 1. — Bacterial and archaeal genomes searched with VirSorter for viral sequences originated from NCBI Refseq and WGS, as well as the Microbial Dark Matter data set (MDM, Rinke et al., 2013) and the SUP05 SAGs data set (Roux et al., 2014). DOI: http://dx.doi.org/10.7554/eLife.08490.004 [file elife08490s001.xls]

## Sheet: Sheet1
Dataset	# class	# genomes	Total length (bp)
RefSeq (Jan. 2014)	58	7726	26909271091
WGS (Jan. 2014)	43	6860	25504435231
MDM	29	264	298310280
SUP05	1	127	79723510
