# Supplementary material for: Viral dark matter and virus–host interactions resolved from publicly available microbial genomes
Source: eLife. 2015 Jul 22;4:e08490. doi: 10.7554/eLife.08490 (PMC4533152; doi:10.7554/eLife.08490)
Supplement: Figure 1—source data 2. — The star (*) marks the questionable detection of an Inoviridae genome in a Caldiserica SAG, which could originate from another bacterium contaminating MDA reagents (see ‘Materials and methods’). DOI: http://dx.doi.org/10.7554/eLife.08490.005 [file elife08490s002.xls]

## Sheet: Sheet1
	Myoviridae	Podoviridae	Siphoviridae	Inoviridae	Microviridae
Bacteroidetes-Bacteroidia	4	2			2
Bacteroidetes-Cytophagia			1
Bacteroidetes-Sphingobacteriia	1		1
Caldiserica (former OP5)	1			1*
Chloroflexi-Thermomicrobia			1
Cloacimonetes (WWE1)			1
Cyanobacteria					1
Firmicutes-Clostridia					1
Firmicutes-Erysipelotrichia			4
Firmicutes-Negativicutes	1	4	42
Fusobacteria			13
Marinimicrobia (SAR406)	2		1
Nitrospina			1
Omnitrophica (OP3)		3
Planctomycetes	2		5
Poribacteria			1
Proteobacteria-Alphaproteobacteria					1
Proteobacteria-Deltaproteobacteria			11
Proteobacteria-Zetaproteobacteria			2
Spirochaetes	47	6	13
Synergistetes			1
Tenericutes-Mollicutes	1		1
Verrucomicrobia	1	1	2
Euryarchaeota-Methanobacteria	4
