# Supplementary material for: Viral dark matter and virus–host interactions resolved from publicly available microbial genomes
Source: eLife. 2015 Jul 22;4:e08490. doi: 10.7554/eLife.08490 (PMC4533152; doi:10.7554/eLife.08490)
Supplement: Figure 1—source data 3. — All sequences currently identified as plasmids on NCBI and which did not display any viral gene in the automatic annotation from NCBI are gathered at the bottom of the table and highlighted in orange. ‘Detection tag’ column indicates how the sequence was detected as viral by VirSorter: ‘hallmark’ for the presence of viral hallmark gene(s), ‘refseq’ for an enrichment in bacterial and archalea virus genes, ‘noncaudo’ for an enrichment in non-Caudovirales genes, and ‘vdb’ for an enrichment in virome-like genes. DOI: http://dx.doi.org/10.7554/eLife.08490.006 [file elife08490s003.xls]

## Sheet: Sheet1
Seq Id	Detection tag	Gene (Total / Viral / PFAM / Unknown )	Affiliation of viral sequence (LCA on best BLAST hits)	Taxonomic affiliation of host genome	Host species/strain	Sequence type	Sequence structure	Cluster
Actinobacteria_gi_223955933-488-36693	hallmark;refseq;vdb	59;21;5;33	Viruses;dsDNA viruses no RNA stage;Caudovirales;unclassified;unclassified;unknown	Bacteria;Actinobacteria;Actinobacteria;Bifidobacteriales;Bifidobacteriaceae;Bifidobacterium	Bifidobacterium longum subsp. infantis CCUG 52486	prophage	linear	Cluster_207
Actinobacteria_gi_224581105	hallmark	123;14;10;99	Viruses;dsDNA viruses no RNA stage;Caudovirales;Siphoviridae;Lambdalikevirus;unknown	Bacteria;Actinobacteria;Actinobacteria;Actinomycetales;Streptomycetaceae;Streptomyces	Streptomyces himastatinicus ATCC 53653	extrachromosomal	linear	Cluster_602
Actinobacteria_gi_227870386	hallmark;refseq	65;26;6;33	Viruses;dsDNA viruses no RNA stage;Caudovirales;unclassified;unclassified;unknown	Bacteria;Actinobacteria;Actinobacteria;Actinomycetales;Corynebacteriaceae;Corynebacterium	Corynebacterium aurimucosum ATCC 700975	extrachromosomal	linear	Cluster_445
Actinobacteria_gi_257461662	refseq	12;6;2;4	Viruses;dsDNA viruses no RNA stage;Caudovirales;Siphoviridae;unknown;unknown	Bacteria;Actinobacteria;Actinobacteria;Actinomycetales;Pseudonocardiaceae;Saccharopolyspora	Saccharopolyspora erythraea NRRL 2338	extrachromosomal	linear	Cluster_19
Actinobacteria_gi_280966972	hallmark	15;4;4;7	Viruses;dsDNA viruses no RNA stage;Caudovirales;Siphoviridae;unclassified;unknown	Bacteria;Actinobacteria;Actinobacteria;Actinomycetales;Mycobacteriaceae;Mycobacterium	Mycobacterium tuberculosis 210	extrachromosomal	linear	unclustered
Actinobacteria_gi_288922759	hallmark;refseq	20;8;;12	Viruses;dsDNA viruses no RNA stage;Caudovirales;Siphoviridae;Phic3unalikevirus;unknown	Bacteria;Actinobacteria;Actinobacteria;Actinomycetales;Frankiaceae;Frankia	Frankia sp. EUN1f	extrachromosomal	linear	Cluster_240
Actinobacteria_gi_288922827	hallmark	27;3;3;21	Viruses;dsDNA viruses no RNA stage;Caudovirales;Siphoviridae;unknown;unknown	Bacteria;Actinobacteria;Actinobacteria;Actinomycetales;Frankiaceae;Frankia	Frankia sp. EUN1f	extrachromosomal	linear	unclustered
Actinobacteria_gi_289705802	hallmark	22;4;1;17	Viruses;dsDNA viruses no RNA stage;Caudovirales;Siphoviridae;Lambdalikevirus;unknown	Bacteria;Actinobacteria;Actinobacteria;Actinomycetales;Micrococcaceae;Micrococcus	Micrococcus luteus SK58	extrachromosomal	linear	Cluster_544
Actinobacteria_gi_289706249	hallmark	55;12;10;33	Viruses;dsDNA viruses no RNA stage;Caudovirales;Siphoviridae;Lambdalikevirus;unknown	Bacteria;Actinobacteria;Actinobacteria;Actinomycetales;Micrococcaceae;Micrococcus	Micrococcus luteus SK58	extrachromosomal	linear	Cluster_544
Actinobacteria_gi_298253790	hallmark;refseq	55;20;13;22	Viruses;dsDNA viruses no RNA stage;Caudovirales;Siphoviridae;unclassified;unknown	Bacteria;Actinobacteria;Actinobacteria;Bifidobacteriales;Bifidobacteriaceae;Gardnerella	Gardnerella vaginalis 5-1	extrachromosomal	linear	Cluster_20
Actinobacteria_gi_309801484	hallmark	97;17;6;74	Viruses;dsDNA viruses no RNA stage;Caudovirales;Siphoviridae;unclassified;unknown	Bacteria;Actinobacteria;Actinobacteria;Bifidobacteriales;Bifidobacteriaceae;Bifidobacterium	Bifidobacterium dentium JCVIHMP022	extrachromosomal	circular	Cluster_597
Actinobacteria_gi_317512503	hallmark	35;7;1;27	Viruses;dsDNA viruses no RNA stage;Caudovirales;Siphoviridae;unknown;unknown	Bacteria;Actinobacteria;Actinobacteria;Actinomycetales;Streptomycetaceae;Streptomyces	Streptomyces sp. SA3_actF	extrachromosomal	linear	Cluster_240
Actinobacteria_gi_317512533	refseq	23;8;1;14	Viruses;dsDNA viruses no RNA stage;Caudovirales;Siphoviridae;unclassified;unclassified	Bacteria;Actinobacteria;Actinobacteria;Actinomycetales;Streptomycetaceae;Streptomyces	Streptomyces sp. SA3_actF	extrachromosomal	linear	Cluster_240
Actinobacteria_gi_317512558	refseq	25;11;1;13	Viruses;dsDNA viruses no RNA stage;Caudovirales;Siphoviridae;unclassified;unknown	Bacteria;Actinobacteria;Actinobacteria;Actinomycetales;Streptomycetaceae;Streptomyces	Streptomyces sp. SA3_actF	extrachromosomal	linear	Cluster_457
Actinobacteria_gi_317512592	hallmark;refseq	17;7;;10	Viruses;dsDNA viruses no RNA stage;Caudovirales;Siphoviridae;unclassified;unknown	Bacteria;Actinobacteria;Actinobacteria;Actinomycetales;Streptomycetaceae;Streptomyces	Streptomyces sp. SA3_actF	extrachromosomal	linear	Cluster_525
Actinobacteria_gi_319434504-31294-49449	hallmark;refseq;vdb	28;7;4;17	Viruses;dsDNA viruses no RNA stage;Caudovirales;Siphoviridae;unknown;unknown	Bacteria;Actinobacteria;Actinobacteria;Bifidobacteriales;Bifidobacteriaceae;Bifidobacterium	Bifidobacterium sp. 12_1_47BFAA	prophage	linear	Cluster_207
Actinobacteria_gi_319434515	hallmark	21;6;1;14	Viruses;dsDNA viruses no RNA stage;Caudovirales;Siphoviridae;unknown;unknown	Bacteria;Actinobacteria;Actinobacteria;Bifidobacteriales;Bifidobacteriaceae;Bifidobacterium	Bifidobacterium sp. 12_1_47BFAA	extrachromosomal	linear	Cluster_207
Actinobacteria_gi_326385254	hallmark;refseq	22;16;;6	Viruses;dsDNA viruses no RNA stage;Caudovirales;Siphoviridae;unknown;unknown	Bacteria;Actinobacteria;Actinobacteria;Actinomycetales;Gordoniaceae;Gordonia	Gordonia neofelifaecis NRRL B-59395	extrachromosomal	linear	Cluster_394
Actinobacteria_gi_335052661-9901-30151	hallmark;refseq;vdb	22;9;7;6	Viruses;dsDNA viruses no RNA stage;Caudovirales;Siphoviridae;unknown;unknown	Bacteria;Actinobacteria;Actinobacteria;Actinomycetales;Propionibacteriaceae;Propionibacterium	Propionibacterium sp. 409-HC1	prophage	linear	Cluster_20
Actinobacteria_gi_343927414	hallmark;refseq	79;36;1;42	Viruses;dsDNA viruses no RNA stage;Caudovirales;Siphoviridae;unknown;unknown	Bacteria;Actinobacteria;Actinobacteria;Actinomycetales;Gordoniaceae;Gordonia	Gordonia alkanivorans NBRC 16433	extrachromosomal	linear	Cluster_387
Actinobacteria_gi_345849874-10087-67150	hallmark	80;16;7;57	Viruses;dsDNA viruses no RNA stage;Caudovirales;unclassified;unclassified;unknown	Bacteria;Actinobacteria;Actinobacteria;Actinomycetales;Streptomycetaceae;Streptomyces	Streptomyces zinciresistens K42	prophage	linear	Cluster_582
Actinobacteria_gi_358445441	refseq;vdb	10;2;5;3	Viruses;dsDNA viruses no RNA stage;Caudovirales;Siphoviridae;unclassified;unclassified	Bacteria;Actinobacteria;Actinobacteria;Actinomycetales;Corynebacteriaceae;Corynebacterium	Corynebacterium casei UCMA 3821	extrachromosomal	linear	Cluster_220
Actinobacteria_gi_367470708-12843-52698	hallmark	59;5;9;45	Viruses;dsDNA viruses no RNA stage;Caudovirales;Siphoviridae;unknown;unknown	Bacteria;Actinobacteria;Actinobacteria;Solirubrobacterales;Patulibacteraceae;Patulibacter	Patulibacter medicamentivorans	prophage	linear	unclustered
Actinobacteria_gi_383825550	hallmark;refseq	63;27;7;29	Viruses;dsDNA viruses no RNA stage;Caudovirales;Siphoviridae;unknown;unknown	Bacteria;Actinobacteria;Actinobacteria;Actinomycetales;Mycobacteriaceae;Mycobacterium	Mycobacterium xenopi RIVM700367	extrachromosomal	circular	Cluster_78
Actinobacteria_gi_405980663	hallmark;refseq	57;19;5;33	Viruses;dsDNA viruses no RNA stage;Caudovirales;Siphoviridae;unknown;unknown	Bacteria;Actinobacteria;Actinobacteria;Actinomycetales;Actinomycetaceae;Actinomyces	Actinomyces turicensis ACS-279-V-Col4	extrachromosomal	circular	Cluster_57
Actinobacteria_gi_405982617	hallmark	15;6;;9	Viruses;dsDNA viruses no RNA stage;Caudovirales;Siphoviridae;unclassified;unknown	Bacteria;Actinobacteria;Actinobacteria;Actinomycetales;Actinomycetaceae;Actinomyces	Actinomyces neuii BVS029A5	extrachromosomal	linear	Cluster_354
Actinobacteria_gi_408543508-152-15228	hallmark;refseq	10;7;2;1	Viruses;dsDNA viruses no RNA stage;Caudovirales;Siphoviridae;Phic3unalikevirus;unknown	Bacteria;Actinobacteria;Actinobacteria;Actinomycetales;Streptomycetaceae;Streptomyces	Streptomyces somaliensis DSM 40738	prophage	linear	Cluster_525
Actinobacteria_gi_410685546	hallmark	48;11;7;30	Viruses;dsDNA viruses no RNA stage;Caudovirales;Siphoviridae;unclassified;unclassified	Bacteria;Actinobacteria;Actinobacteria;Actinomycetales;Streptomycetaceae;Streptomyces	Streptomyces sp. FR1	extrachromosomal	linear	Cluster_610
Actinobacteria_gi_414579940	hallmark;refseq	69;36;8;25	Viruses;dsDNA viruses no RNA stage;Caudovirales;Siphoviridae;unknown;unknown	Bacteria;Actinobacteria;Actinobacteria;Actinomycetales;Mycobacteriaceae;Mycobacterium	Mycobacterium abscessus 5S-1215	extrachromosomal	linear	Cluster_78
Actinobacteria_gi_418422484	hallmark;refseq	92;51;3;38	Viruses;dsDNA viruses no RNA stage;Caudovirales;Siphoviridae;unknown;unknown	Bacteria;Actinobacteria;Actinobacteria;Actinomycetales;Mycobacteriaceae;Mycobacterium	Mycobacterium abscessus subsp. bolletii BD	extrachromosomal	circular	Cluster_132
Actinobacteria_gi_419848920	hallmark;refseq	38;11;2;25	Viruses;dsDNA viruses no RNA stage;Caudovirales;Siphoviridae;unclassified;unknown	Bacteria;Actinobacteria;Actinobacteria;Bifidobacteriales;Bifidobacteriaceae;Bifidobacterium	Bifidobacterium longum subsp. longum 1-6B	extrachromosomal	linear	Cluster_421
Actinobacteria_gi_419853350-0-39534	hallmark;refseq	66;17;6;43	Viruses;dsDNA viruses no RNA stage;Caudovirales;Siphoviridae;unknown;unknown	Bacteria;Actinobacteria;Actinobacteria;Bifidobacteriales;Bifidobacteriaceae;Bifidobacterium	Bifidobacterium longum subsp. longum 2-2B	prophage	linear	Cluster_421
Actinobacteria_gi_419859811	hallmark;refseq	42;16;3;23	Viruses;dsDNA viruses no RNA stage;Caudovirales;Siphoviridae;unclassified;unknown	Bacteria;Actinobacteria;Actinobacteria;Actinomycetales;Corynebacteriaceae;Corynebacterium	Corynebacterium diphtheriae bv. intermedius str. NCTC 5011	extrachromosomal	linear	Cluster_383
Actinobacteria_gi_419962223	hallmark;refseq	63;30;5;28	Viruses;dsDNA viruses no RNA stage;Caudovirales;Siphoviridae;unknown;unknown	Bacteria;Actinobacteria;Actinobacteria;Actinomycetales;Nocardiaceae;Rhodococcus	Rhodococcus opacus M213	extrachromosomal	circular	Cluster_445
Actinobacteria_gi_420151093	hallmark	16;6;2;8	Viruses;dsDNA viruses no RNA stage;Caudovirales;Siphoviridae;unknown;unknown	Bacteria;Actinobacteria;Actinobacteria;Actinomycetales;Actinomycetaceae;Actinomyces	Actinomyces georgiae F0490	extrachromosomal	linear	Cluster_394
Actinobacteria_gi_420966112	refseq	31;11;4;16	Viruses;dsDNA viruses no RNA stage;Caudovirales;Siphoviridae;unknown;unknown	Bacteria;Actinobacteria;Actinobacteria;Actinomycetales;Mycobacteriaceae;Mycobacterium	Mycobacterium abscessus 3A-0810-R	extrachromosomal	linear	Cluster_499
Actinobacteria_gi_421010943-4014-41828	hallmark;refseq	50;22;4;24	Viruses;dsDNA viruses no RNA stage;Caudovirales;Siphoviridae;unknown;unknown	Bacteria;Actinobacteria;Actinobacteria;Actinomycetales;Mycobacteriaceae;Mycobacterium	Mycobacterium abscessus 3A-0122-R	prophage	linear	Cluster_362
Actinobacteria_gi_421017314	hallmark;refseq	42;17;4;21	Viruses;dsDNA viruses no RNA stage;Caudovirales;Siphoviridae;unknown;unknown	Bacteria;Actinobacteria;Actinobacteria;Actinomycetales;Mycobacteriaceae;Mycobacterium	Mycobacterium abscessus 3A-0122-S	extrachromosomal	linear	Cluster_499
Actinobacteria_gi_421031946	hallmark;refseq	37;21;1;15	Viruses;dsDNA viruses no RNA stage;Caudovirales;unclassified;unclassified;unknown	Bacteria;Actinobacteria;Actinobacteria;Actinomycetales;Mycobacteriaceae;Mycobacterium	Mycobacterium abscessus 3A-0930-R	extrachromosomal	linear	Cluster_537
Actinobacteria_gi_421037359	hallmark;refseq	22;12;;10	Viruses;dsDNA viruses no RNA stage;Caudovirales;Siphoviridae;Lambdalikevirus;unknown	Bacteria;Actinobacteria;Actinobacteria;Actinomycetales;Mycobacteriaceae;Mycobacterium	Mycobacterium abscessus 3A-0930-S	extrachromosomal	linear	Cluster_537
Actinobacteria_gi_421742321	hallmark;refseq	100;20;7;73	Viruses;dsDNA viruses no RNA stage;Caudovirales;unclassified;unknown;unknown	Bacteria;Actinobacteria;Actinobacteria;Actinomycetales;Streptomycetaceae;Streptomyces	Streptomyces sp. SM8	extrachromosomal	linear	Cluster_539
Actinobacteria_gi_440697762	hallmark	105;20;4;81	Viruses;dsDNA viruses no RNA stage;Caudovirales;Siphoviridae;unclassified;unclassified	Bacteria;Actinobacteria;Actinobacteria;Actinomycetales;Streptomycetaceae;Streptomyces	Streptomyces turgidiscabies Car8	extrachromosomal	linear	Cluster_582
Actinobacteria_gi_440701504-0-33798	hallmark;refseq	46;16;;30	Viruses;dsDNA viruses no RNA stage;Caudovirales;Siphoviridae;unknown;unknown	Bacteria;Actinobacteria;Actinobacteria;Actinomycetales;Streptomycetaceae;Streptomyces	Streptomyces turgidiscabies Car8	prophage	linear	Cluster_240
Actinobacteria_gi_440705562	hallmark	61;5;16;40	Viruses;dsDNA viruses no RNA stage;Caudovirales;Siphoviridae;unknown;unknown	Bacteria;Actinobacteria;Actinobacteria;Actinomycetales;Streptomycetaceae;Streptomyces	Streptomyces turgidiscabies Car8	extrachromosomal	linear	Cluster_602
Actinobacteria_gi_441157011	hallmark	43;4;14;25	Viruses;dsDNA viruses no RNA stage;Caudovirales;Siphoviridae;unclassified;unknown	Bacteria;Actinobacteria;Actinobacteria;Actinomycetales;Streptomycetaceae;Streptomyces	Streptomyces rimosus subsp. rimosus ATCC 10970	extrachromosomal	linear	unclustered
Actinobacteria_gi_444434169	hallmark;refseq	43;20;1;22	Viruses;dsDNA viruses no RNA stage;Caudovirales;Siphoviridae;unknown;unknown	Bacteria;Actinobacteria;Actinobacteria;Actinomycetales;Gordoniaceae;Gordonia	Gordonia soli NBRC 108243	extrachromosomal	linear	Cluster_446
Actinobacteria_gi_444434225	refseq	37;10;2;25	Viruses;dsDNA viruses no RNA stage;Caudovirales;Siphoviridae;unknown;unknown	Bacteria;Actinobacteria;Actinobacteria;Actinomycetales;Gordoniaceae;Gordonia	Gordonia soli NBRC 108243	extrachromosomal	linear	unclustered
Actinobacteria_gi_458793476	hallmark;refseq	68;29;6;33	Viruses;dsDNA viruses no RNA stage;Caudovirales;Siphoviridae;unknown;unknown	Bacteria;Actinobacteria;Actinobacteria;Actinomycetales;Nocardiaceae;Rhodococcus	Rhodococcus ruber BKS 20-38	extrachromosomal	linear	Cluster_155
Actinobacteria_gi_458877862	hallmark;refseq	62;14;4;44	Viruses;dsDNA viruses no RNA stage;Caudovirales;Siphoviridae;unknown;unknown	Bacteria;Actinobacteria;Actinobacteria;Actinomycetales;Streptomycetaceae;Streptomyces	Streptomyces gancidicus BKS 13-15	extrachromosomal	linear	Cluster_539
Actinobacteria_gi_459042216	hallmark;refseq	76;20;21;35	Viruses;dsDNA viruses no RNA stage;Caudovirales;Siphoviridae;unclassified;unknown	Bacteria;Actinobacteria;Actinobacteria;Actinomycetales;Gordoniaceae;Gordonia	Gordonia malaquae NBRC 108250	extrachromosomal	linear	unclustered
Actinobacteria_gi_482922633	refseq;vdb	25;6;1;18	Viruses;dsDNA viruses no RNA stage;Caudovirales;Myoviridae;unknown;unknown	Bacteria;Actinobacteria;Actinobacteria;unknown;unknown;unknown	actinobacterium SCGC AAA024-D14	extrachromosomal	linear	unclustered
Actinobacteria_gi_482936492	hallmark	113;17;8;88	Viruses;dsDNA viruses no RNA stage;Caudovirales;Siphoviridae;unclassified;unknown	Bacteria;Actinobacteria;Actinobacteria;Actinomycetales;Micromonosporaceae;Salinispora	Salinispora pacifica DSM 45548	extrachromosomal	linear	Cluster_240
Actinobacteria_gi_482937413	hallmark;refseq	49;14;2;33	Viruses;dsDNA viruses no RNA stage;Caudovirales;Siphoviridae;unknown;unknown	Bacteria;Actinobacteria;Actinobacteria;Actinomycetales;Micromonosporaceae;Salinispora	Salinispora pacifica DSM 45544	extrachromosomal	linear	Cluster_214
Actinobacteria_gi_483039162	hallmark;refseq	18;7;;11	Viruses;dsDNA viruses no RNA stage;Caudovirales;Siphoviridae;unknown;unknown	Bacteria;Actinobacteria;Actinobacteria;Actinomycetales;Nocardiaceae;Rhodococcus	Rhodococcus rhodochrous BKS6-46	extrachromosomal	linear	Cluster_155
Actinobacteria_gi_483400703-10663-64185	hallmark;refseq	77;53;1;23	Viruses;dsDNA viruses no RNA stage;Caudovirales;Siphoviridae;unclassified;unclassified	Bacteria;Actinobacteria;Actinobacteria;Actinomycetales;Mycobacteriaceae;Mycobacterium	Mycobacterium intracellulare M.i.198	prophage	linear	Cluster_73
Actinobacteria_gi_483435817-13250-63069	hallmark;refseq	83;74;;9	Viruses;dsDNA viruses no RNA stage;Caudovirales;Siphoviridae;unclassified;unclassified	Bacteria;Actinobacteria;Actinobacteria;Actinomycetales;Mycobacteriaceae;Mycobacterium	Mycobacterium hassiacum DSM 44199	prophage	linear	Cluster_103
Actinobacteria_gi_483692900	hallmark;refseq	50;13;2;35	Viruses;dsDNA viruses no RNA stage;Caudovirales;Siphoviridae;unclassified;unknown	Bacteria;Actinobacteria;Actinobacteria;Actinomycetales;Streptomycetaceae;Streptomyces	Streptomyces vitaminophilus DSM 41686	extrachromosomal	linear	Cluster_374
Actinobacteria_gi_483966370	hallmark	100;13;12;75	Viruses;dsDNA viruses no RNA stage;Caudovirales;unclassified;unclassified;unknown	Bacteria;Actinobacteria;Actinobacteria;Actinomycetales;Frankiaceae;Frankia	Frankia sp. BCU110501	extrachromosomal	linear	Cluster_6
Actinobacteria_gi_483969925	hallmark	49;9;3;37	Viruses;dsDNA viruses no RNA stage;Caudovirales;Siphoviridae;unknown;unknown	Bacteria;Actinobacteria;Actinobacteria;Actinomycetales;Streptomycetaceae;Streptomyces	Streptomyces sp. KhCrAH-244	extrachromosomal	linear	Cluster_581
Actinobacteria_gi_483974391	hallmark;refseq	44;23;3;18	Viruses;dsDNA viruses no RNA stage;Caudovirales;Siphoviridae;unclassified;unknown	Bacteria;Actinobacteria;Actinobacteria;Actinomycetales;Streptomycetaceae;Streptomyces	Streptomyces sp. MspMP-M5	extrachromosomal	linear	Cluster_73
Actinobacteria_gi_483986472	refseq	32;13;;19	Viruses;dsDNA viruses no RNA stage;Caudovirales;Siphoviridae;unknown;unknown	Bacteria;Actinobacteria;Actinobacteria;Actinomycetales;Nocardioidaceae;Actinopolymorpha	Actinopolymorpha alba DSM 45243	extrachromosomal	linear	Cluster_19
Actinobacteria_gi_483996828	refseq	22;10;2;10	Viruses;dsDNA viruses no RNA stage;Caudovirales;Siphoviridae;Phic3unalikevirus;unknown	Bacteria;Actinobacteria;Actinobacteria;Actinomycetales;Frankiaceae;Frankia	Frankia sp. BMG5.12	extrachromosomal	circular	Cluster_42
Actinobacteria_gi_483999582	hallmark	61;11;3;47	Viruses;dsDNA viruses no RNA stage;Caudovirales;unclassified;unknown;unknown	Bacteria;Actinobacteria;Actinobacteria;Actinomycetales;Thermomonosporaceae;Actinomadura	Actinomadura flavalba DSM 45200	extrachromosomal	circular	Cluster_286
Actinobacteria_gi_484005549	refseq	34;17;1;16	Viruses;dsDNA viruses no RNA stage;Caudovirales;Siphoviridae;unclassified;unclassified	Bacteria;Actinobacteria;Actinobacteria;Actinomycetales;Pseudonocardiaceae;Actinokineospora	Actinokineospora enzanensis DSM 44649	extrachromosomal	linear	Cluster_103
Actinobacteria_gi_484011519-11339-40355	hallmark;refseq	35;31;2;2	Viruses;dsDNA viruses no RNA stage;Caudovirales;Siphoviridae;unclassified;unknown	Bacteria;Actinobacteria;Actinobacteria;Actinomycetales;Micromonosporaceae;Salinispora	Salinispora pacifica CNS055	prophage	circular	Cluster_272
Actinobacteria_gi_484012116-1226-53285	hallmark;refseq	78;40;2;36	Viruses;dsDNA viruses no RNA stage;Caudovirales;Siphoviridae;unknown;unknown	Bacteria;Actinobacteria;Actinobacteria;Actinomycetales;Mycobacteriaceae;Mycobacterium	Mycobacterium abscessus 9808	prophage	linear	Cluster_391
Actinobacteria_gi_484014952	hallmark;refseq	118;23;5;90	Viruses;dsDNA viruses no RNA stage;Caudovirales;unclassified;unclassified;unknown	Bacteria;Actinobacteria;Actinobacteria;Actinomycetales;Nocardiopsaceae;Nocardiopsis	Nocardiopsis synnemataformans DSM 44143	extrachromosomal	linear	Cluster_581
Actinobacteria_gi_484017447	hallmark;vdb	17;4;2;11	Viruses;dsDNA viruses no RNA stage;Caudovirales;Siphoviridae;unknown;unknown	Bacteria;Actinobacteria;Actinobacteria;Actinomycetales;Nocardiopsaceae;Nocardiopsis	Nocardiopsis valliformis DSM 45023	extrachromosomal	linear	Cluster_286
Actinobacteria_gi_484019805	hallmark;refseq	34;16;1;17	Viruses;dsDNA viruses no RNA stage;Caudovirales;Siphoviridae;unclassified;unknown	Bacteria;Actinobacteria;Actinobacteria;Actinomycetales;Nocardiopsaceae;Nocardiopsis	Nocardiopsis lucentensis DSM 44048	extrachromosomal	linear	Cluster_263
Actinobacteria_gi_484021587	hallmark;refseq	21;11;1;9	Viruses;dsDNA viruses no RNA stage;Caudovirales;Siphoviridae;Lambdalikevirus;unknown	Bacteria;Actinobacteria;Actinobacteria;Actinomycetales;Nocardiopsaceae;Nocardiopsis	Nocardiopsis lucentensis DSM 44048	extrachromosomal	linear	Cluster_263
Actinobacteria_gi_484023173	hallmark;refseq	17;9;;8	Viruses;dsDNA viruses no RNA stage;Caudovirales;Siphoviridae;Phic3unalikevirus;unknown	Bacteria;Actinobacteria;Actinobacteria;Actinomycetales;Nocardiopsaceae;Nocardiopsis	Nocardiopsis salina YIM 90010	extrachromosomal	linear	Cluster_263
Actinobacteria_gi_484023928	hallmark;refseq	49;16;5;28	Viruses;dsDNA viruses no RNA stage;Caudovirales;Siphoviridae;unclassified;unknown	Bacteria;Actinobacteria;Actinobacteria;Actinomycetales;Nocardiopsaceae;Nocardiopsis	Nocardiopsis salina YIM 90010	extrachromosomal	linear	Cluster_263
Actinobacteria_gi_484024199	hallmark	63;16;5;42	Viruses;dsDNA viruses no RNA stage;Caudovirales;Siphoviridae;unclassified;unclassified	Bacteria;Actinobacteria;Actinobacteria;Actinomycetales;Nocardiopsaceae;Nocardiopsis	Nocardiopsis gilva YIM 90087	extrachromosomal	linear	Cluster_286
Actinobacteria_gi_484024972	hallmark;refseq	36;12;4;20	Viruses;dsDNA viruses no RNA stage;Caudovirales;Siphoviridae;L5likevirus;unknown	Bacteria;Actinobacteria;Actinobacteria;Actinomycetales;Nocardiopsaceae;Nocardiopsis	Nocardiopsis gilva YIM 90087	extrachromosomal	linear	Cluster_103
Actinobacteria_gi_484024991	hallmark;refseq	101;24;11;66	Viruses;dsDNA viruses no RNA stage;Caudovirales;unclassified;unclassified;unknown	Bacteria;Actinobacteria;Actinobacteria;Actinomycetales;Nocardiopsaceae;Nocardiopsis	Nocardiopsis gilva YIM 90087	extrachromosomal	linear	Cluster_590
Actinobacteria_gi_484025394	hallmark;refseq	53;19;;34	Viruses;dsDNA viruses no RNA stage;Caudovirales;Siphoviridae;unknown;unknown	Bacteria;Actinobacteria;Actinobacteria;Actinomycetales;Micromonosporaceae;Salinispora	Salinispora arenicola CNP193	extrachromosomal	linear	Cluster_214
Actinobacteria_gi_484031757	hallmark;vdb	12;3;2;7	Viruses;dsDNA viruses no RNA stage;Caudovirales;Siphoviridae;unknown;unknown	Bacteria;Actinobacteria;Actinobacteria;Actinomycetales;Micromonosporaceae;Salinispora	Salinispora arenicola CNY256	extrachromosomal	linear	Cluster_286
Actinobacteria_gi_484032675-42320-77942	hallmark;refseq	52;16;5;31	Viruses;dsDNA viruses no RNA stage;Caudovirales;Siphoviridae;unclassified;unknown	Bacteria;Actinobacteria;Actinobacteria;Actinomycetales;Micromonosporaceae;Salinispora	Salinispora arenicola CNY260	prophage	linear	Cluster_214
Actinobacteria_gi_484033837	hallmark;refseq	38;11;2;25	Viruses;dsDNA viruses no RNA stage;Caudovirales;Siphoviridae;unknown;unknown	Bacteria;Actinobacteria;Actinobacteria;Actinomycetales;Micromonosporaceae;Salinispora	Salinispora arenicola CNY280	extrachromosomal	linear	Cluster_214
Actinobacteria_gi_484033862	hallmark;refseq	39;13;1;25	Viruses;dsDNA viruses no RNA stage;Caudovirales;Siphoviridae;unknown;unknown	Bacteria;Actinobacteria;Actinobacteria;Actinomycetales;Micromonosporaceae;Salinispora	Salinispora arenicola CNY280	extrachromosomal	linear	Cluster_214
Actinobacteria_gi_484035204	hallmark;refseq	33;9;2;22	Viruses;dsDNA viruses no RNA stage;Caudovirales;Siphoviridae;unknown;unknown	Bacteria;Actinobacteria;Actinobacteria;Actinomycetales;Micromonosporaceae;Salinispora	Salinispora pacifica CNQ768	extrachromosomal	linear	Cluster_214
Actinobacteria_gi_484036214	hallmark;refseq	20;9;1;10	Viruses;dsDNA viruses no RNA stage;Caudovirales;Siphoviridae;unknown;unknown	Bacteria;Actinobacteria;Actinobacteria;Actinomycetales;Micromonosporaceae;Salinispora	Salinispora pacifica CNT584	extrachromosomal	linear	Cluster_214
Actinobacteria_gi_484036993	hallmark	31;3;5;23	Viruses;dsDNA viruses no RNA stage;Caudovirales;Siphoviridae;unknown;unknown	Bacteria;Actinobacteria;Actinobacteria;Actinomycetales;Micromonosporaceae;Salinispora	Salinispora pacifica CNT609	extrachromosomal	linear	unclustered
Actinobacteria_gi_484040487	hallmark;refseq	45;12;;33	Viruses;dsDNA viruses no RNA stage;Caudovirales;Siphoviridae;unknown;unknown	Bacteria;Actinobacteria;Actinobacteria;Actinomycetales;Micromonosporaceae;Salinispora	Salinispora pacifica CNY330	extrachromosomal	linear	Cluster_214
Actinobacteria_gi_484042886-11-24134	hallmark;refseq	29;10;2;17	Viruses;dsDNA viruses no RNA stage;Caudovirales;Siphoviridae;unclassified;unclassified	Bacteria;Actinobacteria;Actinobacteria;Actinomycetales;Micromonosporaceae;Salinispora	Salinispora tropica CNR699	prophage	linear	Cluster_155
Actinobacteria_gi_484042948	hallmark	13;5;3;5	Viruses;dsDNA viruses no RNA stage;Caudovirales;Siphoviridae;unknown;unknown	Bacteria;Actinobacteria;Actinobacteria;Actinomycetales;Micromonosporaceae;Salinispora	Salinispora tropica CNR699	extrachromosomal	linear	Cluster_132
Actinobacteria_gi_484042993	hallmark	15;2;1;12	Viruses;dsDNA viruses no RNA stage;Caudovirales;Siphoviridae;unknown;unknown	Bacteria;Actinobacteria;Actinobacteria;Actinomycetales;Micromonosporaceae;Salinispora	Salinispora tropica CNR699	extrachromosomal	linear	unclustered
Actinobacteria_gi_484048409	hallmark;refseq	66;18;5;43	Viruses;dsDNA viruses no RNA stage;Caudovirales;Siphoviridae;unknown;unknown	Bacteria;Actinobacteria;Actinobacteria;Actinomycetales;Corynebacteriaceae;Corynebacterium	Corynebacterium diphtheriae bv. mitis str. NC03529	extrachromosomal	linear	Cluster_446
Actinobacteria_gi_484048417	hallmark;refseq	40;15;4;21	Viruses;dsDNA viruses no RNA stage;Caudovirales;Siphoviridae;unclassified;unknown	Bacteria;Actinobacteria;Actinobacteria;Actinomycetales;Corynebacteriaceae;Corynebacterium	Corynebacterium diphtheriae bv. mitis str. NC03529	extrachromosomal	linear	Cluster_383
Actinobacteria_gi_484063094-9427-43290	hallmark	35;5;13;17	Viruses;dsDNA viruses no RNA stage;Caudovirales;Siphoviridae;Lambdalikevirus;unknown	Bacteria;Actinobacteria;Actinobacteria;Coriobacteriales;Coriobacteriaceae;unknown	Coriobacteriaceae bacterium GD5	prophage	linear	Cluster_576
Actinobacteria_gi_484064923-31-33894	hallmark	35;5;13;17	Viruses;dsDNA viruses no RNA stage;Caudovirales;Siphoviridae;Lambdalikevirus;unknown	Bacteria;Actinobacteria;Actinobacteria;Coriobacteriales;Coriobacteriaceae;Collinsella	Collinsella sp. GD3	prophage	linear	Cluster_576
Actinobacteria_gi_484080795-158098-231781	hallmark;refseq	99;55;4;40	Viruses;dsDNA viruses no RNA stage;Caudovirales;Siphoviridae;unknown;unknown	Bacteria;Actinobacteria;Actinobacteria;Actinomycetales;Mycobacteriaceae;Mycobacterium	Mycobacterium abscessus M115	prophage	linear	Cluster_132
Actinobacteria_gi_484081368	hallmark;refseq	69;32;;37	Viruses;dsDNA viruses no RNA stage;Caudovirales;Siphoviridae;unclassified;unknown	Bacteria;Actinobacteria;Actinobacteria;Actinomycetales;Mycobacteriaceae;Mycobacterium	Mycobacterium abscessus subsp. bolletii M18	extrachromosomal	linear	Cluster_212
Actinobacteria_gi_484126993-2307-14717	hallmark	21;5;;16	Viruses;dsDNA viruses no RNA stage;Caudovirales;Siphoviridae;unclassified;unknown	Bacteria;Actinobacteria;Actinobacteria;Actinomycetales;Corynebacteriaceae;unknown	Corynebacterium-like bacterium B27	prophage	linear	unclustered
Actinobacteria_gi_484176109	hallmark;vdb	15;1;4;10	Viruses;dsDNA viruses no RNA stage;Caudovirales;unclassified;unclassified;unknown	Bacteria;Actinobacteria;Actinobacteria;Actinomycetales;Micrococcaceae;Kocuria	Kocuria atrinae C3-8	extrachromosomal	linear	Cluster_19
Actinobacteria_gi_484231591	hallmark;refseq	80;27;15;38	Viruses;dsDNA viruses no RNA stage;Caudovirales;Siphoviridae;L5likevirus;unknown	Bacteria;Actinobacteria;Actinobacteria;Actinomycetales;Corynebacteriaceae;Corynebacterium	Corynebacterium mastitidis DSM 44356	extrachromosomal	linear	Cluster_446
Actinobacteria_gi_484335802-74-42145	hallmark;refseq	50;20;8;22	Viruses;dsDNA viruses no RNA stage;Caudovirales;Siphoviridae;unknown;unknown	Bacteria;Actinobacteria;Actinobacteria;Actinomycetales;Mycobacteriaceae;Mycobacterium	Mycobacterium abscessus M156	prophage	linear	Cluster_362
Actinobacteria_gi_484336158	refseq	21;11;1;9	Viruses;dsDNA viruses no RNA stage;Caudovirales;Siphoviridae;unclassified;unknown	Bacteria;Actinobacteria;Actinobacteria;Actinomycetales;Mycobacteriaceae;Mycobacterium	Mycobacterium abscessus M148	extrachromosomal	linear	Cluster_362
Actinobacteria_gi_484336207	refseq	22;13;;9	Viruses;dsDNA viruses no RNA stage;Caudovirales;Siphoviridae;unknown;unknown	Bacteria;Actinobacteria;Actinobacteria;Actinomycetales;Mycobacteriaceae;Mycobacterium	Mycobacterium abscessus M148	extrachromosomal	linear	Cluster_132
Actinobacteria_gi_484336292	hallmark;refseq	36;17;2;17	Viruses;dsDNA viruses no RNA stage;Caudovirales;Siphoviridae;unknown;unknown	Bacteria;Actinobacteria;Actinobacteria;Actinomycetales;Mycobacteriaceae;Mycobacterium	Mycobacterium abscessus M148	extrachromosomal	linear	Cluster_155
Actinobacteria_gi_484336387	hallmark;refseq	36;15;;21	Viruses;dsDNA viruses no RNA stage;Caudovirales;Siphoviridae;unknown;unknown	Bacteria;Actinobacteria;Actinobacteria;Actinomycetales;Mycobacteriaceae;Mycobacterium	Mycobacterium abscessus M148	extrachromosomal	linear	Cluster_362
Actinobacteria_gi_484867420	hallmark	34;11;2;21	Viruses;dsDNA viruses no RNA stage;Caudovirales;Siphoviridae;unclassified;unknown	Bacteria;Actinobacteria;Actinobacteria;Actinomycetales;Streptomycetaceae;Streptomyces	Streptomyces sp. TOR3209	extrachromosomal	linear	Cluster_240
Actinobacteria_gi_484867422	refseq	35;10;;25	Viruses;dsDNA viruses no RNA stage;Caudovirales;Siphoviridae;unknown;unknown	Bacteria;Actinobacteria;Actinobacteria;Actinomycetales;Streptomycetaceae;Streptomyces	Streptomyces sp. TOR3209	extrachromosomal	linear	Cluster_457
Actinobacteria_gi_485069185	hallmark;refseq	59;20;12;27	Viruses;dsDNA viruses no RNA stage;Caudovirales;Siphoviridae;unclassified;unknown	Bacteria;Actinobacteria;Actinobacteria;Actinomycetales;Streptomycetaceae;Streptomyces	Streptomyces sp. FxanaD5	extrachromosomal	linear	Cluster_263
Actinobacteria_gi_485070998	hallmark;refseq	32;13;2;17	Viruses;dsDNA viruses no RNA stage;Caudovirales;Siphoviridae;unknown;unknown	Bacteria;Actinobacteria;Actinobacteria;Actinomycetales;Streptomycetaceae;Streptomyces	Streptomyces sulphureus DSM 40104	extrachromosomal	linear	Cluster_132
Actinobacteria_gi_485467442	hallmark;refseq	13;11;;2	Viruses;dsDNA viruses no RNA stage;Caudovirales;Siphoviridae;unclassified;unknown	Bacteria;Actinobacteria;Actinobacteria;Actinomycetales;Mycobacteriaceae;Mycobacterium	Mycobacterium avium subsp. avium Env 77	extrachromosomal	linear	Cluster_567
Actinobacteria_gi_485467562	hallmark;refseq	22;14;;8	Viruses;dsDNA viruses no RNA stage;Caudovirales;Siphoviridae;unknown;unknown	Bacteria;Actinobacteria;Actinobacteria;Actinomycetales;Mycobacteriaceae;Mycobacterium	Mycobacterium avium subsp. avium Env 77	extrachromosomal	linear	Cluster_567
Actinobacteria_gi_485467603	refseq	17;9;1;7	Viruses;dsDNA viruses no RNA stage;Caudovirales;Siphoviridae;unknown;unknown	Bacteria;Actinobacteria;Actinobacteria;Actinomycetales;Mycobacteriaceae;Mycobacterium	Mycobacterium avium subsp. avium Env 77	extrachromosomal	linear	Cluster_78
Actinobacteria_gi_485663315	hallmark;refseq	35;16;2;17	Viruses;dsDNA viruses no RNA stage;Caudovirales;Siphoviridae;Phic3unalikevirus;unknown	Bacteria;Actinobacteria;Actinobacteria;Actinomycetales;Streptomycetaceae;Streptomyces	Streptomyces sp. Wigar10	extrachromosomal	linear	Cluster_286
Actinobacteria_gi_489177658	hallmark	52;9;3;40	Viruses;dsDNA viruses no RNA stage;Caudovirales;Myoviridae;Punalikevirus;unknown	Bacteria;Actinobacteria;Actinobacteria;Actinomycetales;Pseudonocardiaceae;Amycolatopsis	Amycolatopsis vancoresmycina DSM 44592	extrachromosomal	linear	Cluster_467
Actinobacteria_gi_493997464	hallmark	23;5;5;13	Viruses;dsDNA viruses no RNA stage;Caudovirales;Siphoviridae;unclassified;unknown	Bacteria;Actinobacteria;Actinobacteria;Actinomycetales;Nocardiaceae;Rhodococcus	Rhodococcus sp. EsD8	extrachromosomal	linear	unclustered
Actinobacteria_gi_494002731	hallmark;refseq	67;23;4;40	Viruses;unclassified;unclassified;unclassified;unclassified;unknown	Bacteria;Actinobacteria;Actinobacteria;Actinomycetales;Nocardiaceae;Rhodococcus	Rhodococcus sp. EsD8	extrachromosomal	linear	Cluster_354
Actinobacteria_gi_498789487	refseq	18;9;2;7	Viruses;dsDNA viruses no RNA stage;Caudovirales;Siphoviridae;L5likevirus;unknown	Bacteria;Actinobacteria;Actinobacteria;Actinomycetales;Nocardiaceae;Rhodococcus	Rhodococcus rhodnii LMG 5362	extrachromosomal	linear	Cluster_354
Actinobacteria_gi_498789783	hallmark;refseq	42;18;1;23	Viruses;dsDNA viruses no RNA stage;Caudovirales;Siphoviridae;L5likevirus;unknown	Bacteria;Actinobacteria;Actinobacteria;Actinomycetales;Nocardiaceae;Rhodococcus	Rhodococcus rhodnii LMG 5362	extrachromosomal	linear	Cluster_354
Actinobacteria_gi_498790102	hallmark;refseq	45;26;;19	Viruses;dsDNA viruses no RNA stage;Caudovirales;Siphoviridae;unclassified;unknown	Bacteria;Actinobacteria;Actinobacteria;Actinomycetales;Nocardiaceae;Rhodococcus	Rhodococcus rhodnii LMG 5362	extrachromosomal	linear	Cluster_235
Actinobacteria_gi_498792577	hallmark;refseq	22;14;;8	Viruses;dsDNA viruses no RNA stage;Caudovirales;Siphoviridae;unknown;unknown	Bacteria;Actinobacteria;Actinobacteria;Actinomycetales;Nocardiaceae;Rhodococcus	Rhodococcus rhodnii LMG 5362	extrachromosomal	linear	Cluster_235
Actinobacteria_gi_506496126-11321-56319	hallmark;refseq	78;21;3;54	Viruses;dsDNA viruses no RNA stage;Caudovirales;Siphoviridae;unknown;unknown	Bacteria;Actinobacteria;Actinobacteria;Actinomycetales;Microbacteriaceae;Agrococcus	Agrococcus pavilionensis RW1	prophage	linear	Cluster_382
Actinobacteria_gi_512703811-1170088-1228984	hallmark;refseq	70;25;16;29	Viruses;dsDNA viruses no RNA stage;Caudovirales;unclassified;unclassified;unknown	Bacteria;Actinobacteria;Actinobacteria;Coriobacteriales;Coriobacteriaceae;Atopobium	Atopobium sp. oral taxon 199 str. F0494	prophage	linear	Cluster_57
Actinobacteria_gi_514922871	hallmark;refseq	89;33;11;45	Viruses;dsDNA viruses no RNA stage;Caudovirales;Siphoviridae;Phic3unalikevirus;unknown	Bacteria;Actinobacteria;Actinobacteria;Actinomycetales;Streptomycetaceae;Streptomyces	Streptomyces aurantiacus JA 4570	extrachromosomal	linear	Cluster_374
Actinobacteria_gi_515169684	hallmark	20;7;;13	Viruses;dsDNA viruses no RNA stage;Caudovirales;Siphoviridae;unknown;unknown	Bacteria;Actinobacteria;Actinobacteria;Bifidobacteriales;Bifidobacteriaceae;Gardnerella	Gardnerella vaginalis JCP8151B	extrachromosomal	linear	Cluster_508
Actinobacteria_gi_515203431	hallmark;refseq	16;7;;9	Viruses;dsDNA viruses no RNA stage;Caudovirales;Siphoviridae;unknown;unknown	Bacteria;Actinobacteria;Actinobacteria;Bifidobacteriales;Bifidobacteriaceae;Gardnerella	Gardnerella vaginalis JCP8151A	extrachromosomal	linear	Cluster_508
Actinobacteria_gi_515222949	hallmark;refseq	51;20;11;20	Viruses;dsDNA viruses no RNA stage;Caudovirales;Siphoviridae;unclassified;unknown	Bacteria;Actinobacteria;Actinobacteria;Bifidobacteriales;Bifidobacteriaceae;Gardnerella	Gardnerella vaginalis JCP8108	extrachromosomal	linear	Cluster_20
Actinobacteria_gi_523592800	hallmark;refseq	46;18;8;20	Viruses;dsDNA viruses no RNA stage;Caudovirales;Siphoviridae;unclassified;unknown	Bacteria;Actinobacteria;Actinobacteria;Bifidobacteriales;Bifidobacteriaceae;Gardnerella	Gardnerella vaginalis JCP8017B	extrachromosomal	linear	Cluster_20
Actinobacteria_gi_523593728	hallmark;refseq	34;14;4;16	Viruses;dsDNA viruses no RNA stage;Caudovirales;Siphoviridae;Lambdalikevirus;unknown	Bacteria;Actinobacteria;Actinobacteria;Bifidobacteriales;Bifidobacteriaceae;Gardnerella	Gardnerella vaginalis JCP8017A	extrachromosomal	linear	Cluster_20
Actinobacteria_gi_523594143	hallmark;refseq	54;20;16;18	Viruses;dsDNA viruses no RNA stage;Caudovirales;Siphoviridae;unclassified;unknown	Bacteria;Actinobacteria;Actinobacteria;Bifidobacteriales;Bifidobacteriaceae;Gardnerella	Gardnerella vaginalis JCP7719	extrachromosomal	linear	Cluster_20
Actinobacteria_gi_523607311	hallmark;refseq	64;20;17;27	Viruses;dsDNA viruses no RNA stage;Caudovirales;Siphoviridae;unclassified;unknown	Bacteria;Actinobacteria;Actinobacteria;Bifidobacteriales;Bifidobacteriaceae;Gardnerella	Gardnerella vaginalis JCP7276	extrachromosomal	linear	Cluster_20
Actinobacteria_gi_544674883-1159-10410	hallmark;refseq	14;6;1;7	Viruses;dsDNA viruses no RNA stage;Caudovirales;Siphoviridae;unknown;unknown	Bacteria;Actinobacteria;Actinobacteria;Actinomycetales;Propionibacteriaceae;Propionibacterium	Propionibacterium avidum TM16	prophage	linear	Cluster_207
Actinobacteria_gi_544774031	hallmark;refseq	59;21;;38	Viruses;dsDNA viruses no RNA stage;Caudovirales;Siphoviridae;unclassified;unknown	Bacteria;Actinobacteria;Actinobacteria;Actinomycetales;Microbacteriaceae;Microbacterium	Microbacterium maritypicum MF109	extrachromosomal	linear	Cluster_382
Actinobacteria_gi_544775493	hallmark	23;8;;15	Viruses;dsDNA viruses no RNA stage;Caudovirales;Siphoviridae;unclassified;unknown	Bacteria;Actinobacteria;Actinobacteria;Actinomycetales;Microbacteriaceae;Microbacterium	Microbacterium maritypicum MF109	extrachromosomal	circular	Cluster_2
Actinobacteria_gi_544933272	refseq	12;6;2;4	Viruses;dsDNA viruses no RNA stage;Caudovirales;Siphoviridae;unknown;unknown	Bacteria;Actinobacteria;Actinobacteria;Actinomycetales;Pseudonocardiaceae;Saccharopolyspora	Saccharopolyspora erythraea D	extrachromosomal	linear	Cluster_19
Actinobacteria_gi_545333501	hallmark;refseq	37;14;1;22	Viruses;dsDNA viruses no RNA stage;Caudovirales;Siphoviridae;unclassified;unknown	Bacteria;Actinobacteria;Actinobacteria;Actinomycetales;Actinomycetaceae;Actinomyces	Actinomyces johnsonii F0510	extrachromosomal	linear	Cluster_374
Actinobacteria_gi_545352115-20076-47096	hallmark;refseq;vdb	34;11;2;21	Viruses;dsDNA viruses no RNA stage;Caudovirales;Siphoviridae;unknown;unknown	Bacteria;Actinobacteria;Actinobacteria;Actinomycetales;Actinomycetaceae;Actinomyces	Actinomyces sp. oral taxon 877 str. F0543	prophage	linear	Cluster_207
Actinobacteria_gi_545408482	hallmark	33;9;5;19	Viruses;dsDNA viruses no RNA stage;Caudovirales;Siphoviridae;L5likevirus;unknown	Bacteria;Actinobacteria;Actinobacteria;Bifidobacteriales;Bifidobacteriaceae;Bifidobacterium	Bifidobacterium bifidum ATCC 29521 = JCM 1255 = DSM 20456	extrachromosomal	linear	Cluster_207
Actinobacteria_gi_545410648	hallmark;vdb	31;8;3;20	Viruses;dsDNA viruses no RNA stage;Caudovirales;Siphoviridae;unknown;unknown	Bacteria;Actinobacteria;Actinobacteria;Bifidobacteriales;Bifidobacteriaceae;Bifidobacterium	Bifidobacterium breve JCP7499	extrachromosomal	linear	Cluster_207
Actinobacteria_gi_545597125-23523-54898	hallmark;refseq;vdb	54;16;3;35	Viruses;dsDNA viruses no RNA stage;Caudovirales;Siphoviridae;unknown;unknown	Bacteria;Actinobacteria;Actinobacteria;Coriobacteriales;Coriobacteriaceae;Olsenella	Olsenella profusa F0195	prophage	linear	Cluster_197
Actinobacteria_gi_545597997	hallmark;refseq	46;14;5;27	Viruses;dsDNA viruses no RNA stage;Caudovirales;Siphoviridae;unclassified;unknown	Bacteria;Actinobacteria;Actinobacteria;Coriobacteriales;Coriobacteriaceae;Olsenella	Olsenella profusa F0195	extrachromosomal	linear	Cluster_382
Actinobacteria_gi_545611432	hallmark	55;14;5;36	Viruses;dsDNA viruses no RNA stage;Caudovirales;Siphoviridae;Lambdalikevirus;unknown	Bacteria;Actinobacteria;Actinobacteria;Coriobacteriales;Coriobacteriaceae;Atopobium	Atopobium sp. BV3Ac4	extrachromosomal	linear	Cluster_76
Actinobacteria_gi_546862272	hallmark	13;5;1;7	Viruses;dsDNA viruses no RNA stage;Caudovirales;Podoviridae;Phi29likevirus;unknown	Bacteria;Actinobacteria;Actinobacteria;Coriobacteriales;Coriobacteriaceae;Eggerthella	Eggerthella sp. CAG:1427	extrachromosomal	linear	Cluster_182
Actinobacteria_gi_547761680-18542-28527	noncaudo	11;4;1;6	Viruses;unclassified;unclassified;unclassified;unclassified;unknown	Bacteria;Actinobacteria;Actinobacteria;Bifidobacteriales;Bifidobacteriaceae;Bifidobacterium	Bifidobacterium bifidum CAG:234	prophage	linear	unclustered
Actinobacteria_gi_548079438	refseq;vdb	39;12;3;24	Viruses;dsDNA viruses no RNA stage;Caudovirales;Siphoviridae;Lambdalikevirus;unknown	Bacteria;Actinobacteria;Actinobacteria;Coriobacteriales;Coriobacteriaceae;Cryptobacterium	Cryptobacterium sp. CAG:338	extrachromosomal	linear	Cluster_94
Actinobacteria_gi_548163931	hallmark;refseq	30;12;4;14	Viruses;dsDNA viruses no RNA stage;Caudovirales;Siphoviridae;Lambdalikevirus;unknown	Bacteria;Actinobacteria;Actinobacteria;Coriobacteriales;Coriobacteriaceae;Collinsella	Collinsella sp. CAG:289	extrachromosomal	linear	Cluster_426
Actinobacteria_gi_548569677	hallmark	19;6;;13	Viruses;dsDNA viruses no RNA stage;Caudovirales;Siphoviridae;unknown;unknown	Bacteria;Actinobacteria;Actinobacteria;Bifidobacteriales;Bifidobacteriaceae;Bifidobacterium	Bifidobacterium longum subsp. longum CECT 7347	extrachromosomal	linear	Cluster_207
Actinobacteria_gi_550255506	hallmark;refseq	59;57;;2	Viruses;dsDNA viruses no RNA stage;Caudovirales;Siphoviridae;unknown;unknown	Bacteria;Actinobacteria;Actinobacteria;Actinomycetales;Nocardiaceae;Rhodococcus	Rhodococcus equi NBRC 101255 = C 7	extrachromosomal	linear	Cluster_598
Actinobacteria_gi_551236822	hallmark	40;12;3;25	Viruses;dsDNA viruses no RNA stage;Caudovirales;Siphoviridae;unknown;unknown	Bacteria;Actinobacteria;Actinobacteria;Bifidobacteriales;Bifidobacteriaceae;Alloscardovia	Alloscardovia omnicolens DSM 21503	extrachromosomal	circular	Cluster_421
Actinobacteria_gi_551239924	hallmark;refseq	38;10;2;26	Viruses;dsDNA viruses no RNA stage;Caudovirales;unclassified;unclassified;unknown	Bacteria;Actinobacteria;Actinobacteria;Bifidobacteriales;Bifidobacteriaceae;Bifidobacterium	Bifidobacterium magnum DSM 20222	extrachromosomal	linear	Cluster_597
Actinobacteria_gi_551245205	hallmark	22;6;2;14	Viruses;dsDNA viruses no RNA stage;Caudovirales;Siphoviridae;unclassified;unknown	Bacteria;Actinobacteria;Actinobacteria;Actinomycetales;Actinomycetaceae;Varibaculum	Varibaculum cambriense DSM 15806	extrachromosomal	circular	Cluster_394
Actinobacteria_gi_564018020	hallmark	41;7;5;29	Viruses;dsDNA viruses no RNA stage;Caudovirales;Siphoviridae;unclassified;unknown	Bacteria;Actinobacteria;Actinobacteria;Actinomycetales;Frankiaceae;Frankia	Frankia sp. CcI6	extrachromosomal	linear	Cluster_42
Actinobacteria_gi_564945046	refseq	32;14;5;13	Viruses;dsDNA viruses no RNA stage;Caudovirales;Siphoviridae;unknown;unknown	Bacteria;Actinobacteria;Actinobacteria;Actinomycetales;Mycobacteriaceae;Mycobacterium	Mycobacterium avium subsp. hominissuis 10-5606	extrachromosomal	linear	Cluster_391
Actinobacteria_gi_564971081	hallmark;refseq	16;9;;7	Viruses;dsDNA viruses no RNA stage;Caudovirales;Siphoviridae;unknown;unknown	Bacteria;Actinobacteria;Actinobacteria;Actinomycetales;Mycobacteriaceae;Mycobacterium	Mycobacterium avium subsp. hominissuis 10-5606	extrachromosomal	linear	Cluster_209
Actinobacteria_gi_564971092	hallmark	18;4;2;12	Viruses;dsDNA viruses no RNA stage;Caudovirales;Siphoviridae;unclassified;unknown	Bacteria;Actinobacteria;Actinobacteria;Actinomycetales;Mycobacteriaceae;Mycobacterium	Mycobacterium avium subsp. hominissuis 10-5606	extrachromosomal	linear	Cluster_19
Actinobacteria_gi_568063277	hallmark	43;10;5;28	Viruses;dsDNA viruses no RNA stage;Caudovirales;Siphoviridae;Lambdalikevirus;unknown	Bacteria;Actinobacteria;Actinobacteria;Actinomycetales;Streptomycetaceae;Streptomyces	Streptomyces sp. F2	extrachromosomal	linear	Cluster_610
Alphaproteobacteria_gi_146276058-2120630-2161130	hallmark;refseq	57;32;4;21	Viruses;dsDNA viruses no RNA stage;Caudovirales;Siphoviridae;Lambdalikevirus;unknown	Bacteria;Proteobacteria;Alphaproteobacteria;Rhodobacterales;Rhodobacteraceae;Rhodobacter	Rhodobacter sphaeroides ATCC 17025	prophage	linear	Cluster_101
Alphaproteobacteria_gi_163867306-1933082-1971336	hallmark;refseq	47;28;5;14	Viruses;dsDNA viruses no RNA stage;Caudovirales;unclassified;unclassified;unknown	Bacteria;Proteobacteria;Alphaproteobacteria;Rhizobiales;Bartonellaceae;Bartonella	Bartonella tribocorum CIP 105476	prophage	linear	Cluster_101
Alphaproteobacteria_gi_170744977	hallmark	29;4;3;22	Viruses;dsDNA viruses no RNA stage;Caudovirales;unclassified;unknown;unknown	Bacteria;Proteobacteria;Alphaproteobacteria;Rhizobiales;Methylobacteriaceae;Methylobacterium	Methylobacterium radiotolerans JCM 2831	extrachromosomal	linear	Cluster_1
Alphaproteobacteria_gi_188579259	hallmark;vdb	27;7;10;10	Viruses;dsDNA viruses no RNA stage;Caudovirales;Siphoviridae;Lambdalikevirus;unknown	Bacteria;Proteobacteria;Alphaproteobacteria;Rhizobiales;Methylobacteriaceae;Methylobacterium	Methylobacterium populi BJ001	extrachromosomal	linear	Cluster_42
Alphaproteobacteria_gi_224580656-0-35096	hallmark;refseq;vdb	24;10;10;4	Viruses;dsDNA viruses no RNA stage;Caudovirales;unclassified;unclassified;unclassified	Bacteria;Proteobacteria;Alphaproteobacteria;Rickettsiales;Anaplasmataceae;Wolbachia	Wolbachia endosymbiont of Culex quinquefasciatus JHB	prophage	linear	Cluster_181
Alphaproteobacteria_gi_224580657	hallmark	86;16;33;37	Viruses;dsDNA viruses no RNA stage;Caudovirales;Myoviridae;unknown;unknown	Bacteria;Proteobacteria;Alphaproteobacteria;Rickettsiales;Anaplasmataceae;Wolbachia	Wolbachia endosymbiont of Culex quinquefasciatus JHB	extrachromosomal	linear	Cluster_181
Alphaproteobacteria_gi_254505302	hallmark;refseq	53;20;4;29	Viruses;dsDNA viruses no RNA stage;Caudovirales;unclassified;unclassified;unknown	Bacteria;Proteobacteria;Alphaproteobacteria;Rhodobacterales;Rhodobacteraceae;Labrenzia	Labrenzia alexandrii DFL-11	extrachromosomal	linear	Cluster_58
Alphaproteobacteria_gi_260576679	hallmark	60;14;18;28	Viruses;dsDNA viruses no RNA stage;Caudovirales;Siphoviridae;unclassified;unknown	Bacteria;Proteobacteria;Alphaproteobacteria;Rhodobacterales;Rhodobacteraceae;Rhodobacter	Rhodobacter sp. SW2	extrachromosomal	linear	Cluster_136
Alphaproteobacteria_gi_260577034	hallmark	47;12;11;24	Viruses;dsDNA viruses no RNA stage;Caudovirales;Siphoviridae;Lambdalikevirus;unknown	Bacteria;Proteobacteria;Alphaproteobacteria;Rhodobacterales;Rhodobacteraceae;Rhodobacter	Rhodobacter sp. SW2	extrachromosomal	linear	Cluster_136
Alphaproteobacteria_gi_260577346	hallmark;vdb	20;5;5;10	Viruses;dsDNA viruses no RNA stage;Caudovirales;Siphoviridae;Lambdalikevirus;unknown	Bacteria;Proteobacteria;Alphaproteobacteria;Rhodobacterales;Rhodobacteraceae;Rhodobacter	Rhodobacter sp. SW2	extrachromosomal	linear	Cluster_10
Alphaproteobacteria_gi_304393905	hallmark;refseq	91;27;8;56	Viruses;dsDNA viruses no RNA stage;Caudovirales;unclassified;unclassified;unclassified	Bacteria;Proteobacteria;Alphaproteobacteria;Rhodobacterales;Rhodobacteraceae;Ahrensia	Ahrensia sp. R2A130	extrachromosomal	linear	Cluster_3
Alphaproteobacteria_gi_306839375	hallmark;refseq	46;17;11;18	Viruses;dsDNA viruses no RNA stage;Caudovirales;Myoviridae;T4likevirus;unknown	Bacteria;Proteobacteria;Alphaproteobacteria;Rhizobiales;Brucellaceae;Brucella	Brucella sp. NF 2653	extrachromosomal	linear	Cluster_131
Alphaproteobacteria_gi_306840416	hallmark	48;11;4;33	Viruses;dsDNA viruses no RNA stage;Caudovirales;Siphoviridae;Lambdalikevirus;unknown	Bacteria;Proteobacteria;Alphaproteobacteria;Rhizobiales;Brucellaceae;Brucella	Brucella sp. BO2	extrachromosomal	linear	Cluster_4
Alphaproteobacteria_gi_306840426	hallmark;vdb	16;5;1;10	Viruses;dsDNA viruses no RNA stage;Caudovirales;Siphoviridae;unknown;unknown	Bacteria;Proteobacteria;Alphaproteobacteria;Rhizobiales;Brucellaceae;Brucella	Brucella sp. BO2	extrachromosomal	linear	Cluster_4
Alphaproteobacteria_gi_306843026	hallmark	22;8;5;9	Viruses;dsDNA viruses no RNA stage;Caudovirales;Myoviridae;Mulikevirus;unknown	Bacteria;Proteobacteria;Alphaproteobacteria;Rhizobiales;Brucellaceae;Brucella	Brucella sp. BO2	extrachromosomal	linear	Cluster_101
Alphaproteobacteria_gi_306846319	hallmark;refseq	17;15;;2	Viruses;dsDNA viruses no RNA stage;Caudovirales;unclassified;unclassified;unknown	Bacteria;Proteobacteria;Alphaproteobacteria;Rhizobiales;Brucellaceae;Brucella	Brucella inopinata BO1	extrachromosomal	linear	Cluster_42
Alphaproteobacteria_gi_307943872	hallmark;refseq	27;12;3;12	Viruses;dsDNA viruses no RNA stage;Caudovirales;unclassified;unclassified;unknown	Bacteria;Proteobacteria;Alphaproteobacteria;Rhodobacterales;Rhodobacteraceae;Roseibium	Roseibium sp. TrichSKD4	extrachromosomal	linear	Cluster_0
Alphaproteobacteria_gi_307944653	hallmark;refseq	67;21;10;36	Viruses;dsDNA viruses no RNA stage;Caudovirales;unclassified;unclassified;unknown	Bacteria;Proteobacteria;Alphaproteobacteria;Rhodobacterales;Rhodobacteraceae;Roseibium	Roseibium sp. TrichSKD4	extrachromosomal	linear	Cluster_0
Alphaproteobacteria_gi_315121750-175543-216747	hallmark;refseq	48;33;2;13	Viruses;dsDNA viruses no RNA stage;Caudovirales;unclassified;unknown;unknown	Bacteria;Proteobacteria;Alphaproteobacteria;Rhizobiales;Rhizobiaceae;Candidatus Liberibacter	Candidatus Liberibacter solanacearum CLso-ZC1	prophage	linear	Cluster_260
Alphaproteobacteria_gi_329113603	refseq	29;11;10;8	Viruses;dsDNA viruses no RNA stage;Caudovirales;Myoviridae;Mulikevirus;unknown	Bacteria;Proteobacteria;Alphaproteobacteria;Rhodospirillales;Acetobacteraceae;Acetobacter	Acetobacter pomorum DM001	extrachromosomal	linear	Cluster_101
Alphaproteobacteria_gi_329115469	hallmark	33;8;6;19	Viruses;dsDNA viruses no RNA stage;Caudovirales;Siphoviridae;Lambdalikevirus;unknown	Bacteria;Proteobacteria;Alphaproteobacteria;Rhodospirillales;Acetobacteraceae;Acetobacter	Acetobacter pomorum DM001	extrachromosomal	linear	Cluster_376
Alphaproteobacteria_gi_330992627	hallmark	17;3;4;10	Viruses;dsDNA viruses no RNA stage;Caudovirales;Siphoviridae;unknown;unknown	Bacteria;Proteobacteria;Alphaproteobacteria;Rhodospirillales;Acetobacteraceae;Gluconacetobacter	Gluconacetobacter sp. SXCC-1	extrachromosomal	linear	Cluster_395
Alphaproteobacteria_gi_335035758	hallmark	20;7;;13	Viruses;dsDNA viruses no RNA stage;Caudovirales;Podoviridae;unclassified;unknown	Bacteria;Proteobacteria;Alphaproteobacteria;Rhizobiales;Rhizobiaceae;Agrobacterium	Agrobacterium sp. ATCC 31749	extrachromosomal	linear	Cluster_563
Alphaproteobacteria_gi_339021592	hallmark;refseq	24;15;6;3	Viruses;dsDNA viruses no RNA stage;Caudovirales;Myoviridae;unknown;unknown	Bacteria;Proteobacteria;Alphaproteobacteria;Rhodospirillales;Acetobacteraceae;Acetobacter	Acetobacter tropicalis NBRC 101654	extrachromosomal	linear	Cluster_54
Alphaproteobacteria_gi_339021902	hallmark	19;6;;13	Viruses;dsDNA viruses no RNA stage;Caudovirales;Siphoviridae;Lambdalikevirus;unknown	Bacteria;Proteobacteria;Alphaproteobacteria;Rhodospirillales;Acetobacteraceae;Acetobacter	Acetobacter tropicalis NBRC 101654	extrachromosomal	linear	unclustered
Alphaproteobacteria_gi_339021999	refseq	18;11;;7	Viruses;dsDNA viruses no RNA stage;Caudovirales;unclassified;unclassified;unknown	Bacteria;Proteobacteria;Alphaproteobacteria;Rhodospirillales;Acetobacteraceae;Acetobacter	Acetobacter tropicalis NBRC 101654	extrachromosomal	linear	Cluster_54
Alphaproteobacteria_gi_339022256	refseq;vdb	13;5;3;5	Viruses;dsDNA viruses no RNA stage;Caudovirales;Siphoviridae;unclassified;unknown	Bacteria;Proteobacteria;Alphaproteobacteria;Rhodospirillales;Acetobacteraceae;Acetobacter	Acetobacter tropicalis NBRC 101654	extrachromosomal	circular	Cluster_4
Alphaproteobacteria_gi_339022435	hallmark	15;6;1;8	Viruses;dsDNA viruses no RNA stage;Caudovirales;Myoviridae;Mulikevirus;unknown	Bacteria;Proteobacteria;Alphaproteobacteria;Rhodospirillales;Acetobacteraceae;Acetobacter	Acetobacter tropicalis NBRC 101654	extrachromosomal	linear	Cluster_3
Alphaproteobacteria_gi_339959485	hallmark;refseq	18;8;2;8	Viruses;dsDNA viruses no RNA stage;Caudovirales;Siphoviridae;Lambdalikevirus;unknown	Bacteria;Proteobacteria;Alphaproteobacteria;Rhodobacterales;Rhodobacteraceae;Paracoccus	Paracoccus sp. TRP	extrachromosomal	linear	Cluster_218
Alphaproteobacteria_gi_348166658-37040-88255	hallmark;refseq	76;29;4;43	Viruses;dsDNA viruses no RNA stage;Caudovirales;unclassified;unknown;unknown	Bacteria;Proteobacteria;Alphaproteobacteria;Rhodospirillales;Acetobacteraceae;Komagataeibacter	Gluconacetobacter europaeus LMG 18494	prophage	linear	Cluster_54
Alphaproteobacteria_gi_348166710	hallmark	18;4;3;11	Viruses;dsDNA viruses no RNA stage;Caudovirales;Siphoviridae;unknown;unknown	Bacteria;Proteobacteria;Alphaproteobacteria;Rhodospirillales;Acetobacteraceae;Komagataeibacter	Gluconacetobacter europaeus LMG 18494	extrachromosomal	circular	Cluster_6
Alphaproteobacteria_gi_348166900	hallmark	49;15;11;23	Viruses;dsDNA viruses no RNA stage;Caudovirales;unclassified;unclassified;unknown	Bacteria;Proteobacteria;Alphaproteobacteria;Rhodospirillales;Acetobacteraceae;Komagataeibacter	Gluconacetobacter oboediens 174Bp2	extrachromosomal	linear	Cluster_28
Alphaproteobacteria_gi_353025795	hallmark	10;4;3;3	Viruses;dsDNA viruses no RNA stage;Caudovirales;Myoviridae;unknown;unknown	Bacteria;Proteobacteria;Alphaproteobacteria;Rickettsiales;Anaplasmataceae;Wolbachia	Wolbachia endosymbiont wVitB of Nasonia vitripennis	extrachromosomal	linear	Cluster_181
Alphaproteobacteria_gi_354594202	hallmark;refseq;vdb	66;15;22;29	Viruses;dsDNA viruses no RNA stage;Caudovirales;Siphoviridae;Lambdalikevirus;unknown	Bacteria;Proteobacteria;Alphaproteobacteria;Rhodospirillales;Acetobacteraceae;Commensalibacter	Commensalibacter intestini A911	extrachromosomal	linear	Cluster_3
Alphaproteobacteria_gi_354595417	hallmark	46;9;9;28	Viruses;dsDNA viruses no RNA stage;Caudovirales;unclassified;;unknown	Bacteria;Proteobacteria;Alphaproteobacteria;Rhodospirillales;Acetobacteraceae;Commensalibacter	Commensalibacter intestini A911	extrachromosomal	linear	Cluster_82
Alphaproteobacteria_gi_357032483	hallmark	44;14;10;20	Viruses;dsDNA viruses no RNA stage;Caudovirales;Myoviridae;Mulikevirus;unknown	Bacteria;Proteobacteria;Alphaproteobacteria;Rhodospirillales;Acetobacteraceae;Gluconobacter	Gluconobacter morbifer G707	extrachromosomal	linear	Cluster_3
Alphaproteobacteria_gi_359400421	hallmark;refseq	41;21;4;16	Viruses;dsDNA viruses no RNA stage;Caudovirales;Myoviridae;Hpunalikevirus;unknown	Bacteria;Proteobacteria;Alphaproteobacteria;Sphingomonadales;Sphingomonadaceae;Novosphingobium	Novosphingobium pentaromativorans US6-1	extrachromosomal	linear	Cluster_0
Alphaproteobacteria_gi_359789361	refseq	39;13;4;22	Viruses;dsDNA viruses no RNA stage;Caudovirales;Podoviridae;;unknown	Bacteria;Proteobacteria;Alphaproteobacteria;Rhizobiales;Phyllobacteriaceae;Mesorhizobium	Mesorhizobium alhagi CCNWXJ12-2	extrachromosomal	linear	Cluster_205
Alphaproteobacteria_gi_359790220	hallmark;refseq	58;22;7;29	Viruses;dsDNA viruses no RNA stage;Caudovirales;unclassified;unclassified;unclassified	Bacteria;Proteobacteria;Alphaproteobacteria;Rhizobiales;Phyllobacteriaceae;Mesorhizobium	Mesorhizobium alhagi CCNWXJ12-2	extrachromosomal	linear	Cluster_517
Alphaproteobacteria_gi_359790324	hallmark;refseq	34;13;4;17	Viruses;dsDNA viruses no RNA stage;Caudovirales;Siphoviridae;Lambdalikevirus;unknown	Bacteria;Proteobacteria;Alphaproteobacteria;Rhizobiales;Phyllobacteriaceae;Mesorhizobium	Mesorhizobium alhagi CCNWXJ12-2	extrachromosomal	linear	Cluster_218
Alphaproteobacteria_gi_365882891	hallmark;refseq	106;27;27;52	Viruses;dsDNA viruses no RNA stage;Caudovirales;unclassified;unclassified;unknown	Bacteria;Proteobacteria;Alphaproteobacteria;Rhizobiales;Bradyrhizobiaceae;Bradyrhizobium	Bradyrhizobium sp. ORS 375	extrachromosomal	linear	Cluster_0
Alphaproteobacteria_gi_365886390	hallmark	17;3;1;13	Viruses;dsDNA viruses no RNA stage;Caudovirales;Myoviridae;;unknown	Bacteria;Proteobacteria;Alphaproteobacteria;Rhizobiales;Bradyrhizobiaceae;Bradyrhizobium	Bradyrhizobium sp. STM 3809	extrachromosomal	linear	Cluster_19
Alphaproteobacteria_gi_365896721	refseq	13;9;;4	Viruses;dsDNA viruses no RNA stage;Caudovirales;Myoviridae;unknown;unknown	Bacteria;Proteobacteria;Alphaproteobacteria;Rhizobiales;Bradyrhizobiaceae;Bradyrhizobium	Bradyrhizobium sp. STM 3843	extrachromosomal	linear	Cluster_54
Alphaproteobacteria_gi_372137200	hallmark	13;5;;8	Viruses;dsDNA viruses no RNA stage;Caudovirales;Podoviridae;unknown;unknown	Bacteria;Proteobacteria;Alphaproteobacteria;Rhodobacterales;Rhodobacteraceae;Oceanicola	Oceanicola sp. S124	extrachromosomal	linear	Cluster_7
Alphaproteobacteria_gi_372137318-398-37125	hallmark;refseq	48;28;4;16	Viruses;dsDNA viruses no RNA stage;Caudovirales;Siphoviridae;unknown;unknown	Bacteria;Proteobacteria;Alphaproteobacteria;Rhodobacterales;Rhodobacteraceae;Oceanicola	Oceanicola sp. S124	prophage	linear	Cluster_3
Alphaproteobacteria_gi_373449894	hallmark;vdb	13;2;5;6	Viruses;dsDNA viruses no RNA stage;Caudovirales;Siphoviridae;unclassified;unclassified	Bacteria;Proteobacteria;Alphaproteobacteria;Rickettsiales;Anaplasmataceae;Wolbachia	Wolbachia pipientis wAlbB	extrachromosomal	linear	Cluster_181
Alphaproteobacteria_gi_374088007	hallmark	41;9;7;25	Viruses;dsDNA viruses no RNA stage;Caudovirales;Siphoviridae;Lambdalikevirus;unknown	Bacteria;Proteobacteria;Alphaproteobacteria;Rhodospirillales;Acetobacteraceae;unknown	Acetobacteraceae bacterium AT-5844	extrachromosomal	linear	Cluster_376
Alphaproteobacteria_gi_381168833	hallmark;vdb	18;5;3;10	Viruses;dsDNA viruses no RNA stage;Caudovirales;Siphoviridae;Lambdalikevirus;unknown	Bacteria;Proteobacteria;Alphaproteobacteria;Rhodospirillales;Rhodospirillaceae;Phaeospirillum	Phaeospirillum molischianum DSM 120	extrachromosomal	linear	Cluster_571
Alphaproteobacteria_gi_381414274	hallmark	29;8;3;18	Viruses;dsDNA viruses no RNA stage;Caudovirales;Myoviridae;unknown;unknown	Bacteria;Proteobacteria;Alphaproteobacteria;Sphingomonadales;Sphingomonadaceae;Sphingomonas	Sphingomonas elodea ATCC 31461	extrachromosomal	linear	Cluster_0
Alphaproteobacteria_gi_381414287	hallmark;refseq	29;18;2;9	Viruses;dsDNA viruses no RNA stage;Caudovirales;Myoviridae;Hpunalikevirus;unknown	Bacteria;Proteobacteria;Alphaproteobacteria;Sphingomonadales;Sphingomonadaceae;Sphingomonas	Sphingomonas elodea ATCC 31461	extrachromosomal	linear	Cluster_0
Alphaproteobacteria_gi_384917524	hallmark;vdb	34;6;15;13	Viruses;dsDNA viruses no RNA stage;Caudovirales;Siphoviridae;Yualikevirus;unknown	Bacteria;Proteobacteria;Alphaproteobacteria;Rhodobacterales;Rhodobacteraceae;Citreicella	Citreicella sp. 357	extrachromosomal	linear	Cluster_136
Alphaproteobacteria_gi_390168193	hallmark	21;3;1;17	Viruses;dsDNA viruses no RNA stage;Caudovirales;Podoviridae;;unknown	Bacteria;Proteobacteria;Alphaproteobacteria;Sphingomonadales;Sphingomonadaceae;Sphingobium	Sphingobium indicum B90A	extrachromosomal	linear	unclustered
Alphaproteobacteria_gi_393764654	hallmark;refseq	67;24;1;42	Viruses;dsDNA viruses no RNA stage;Caudovirales;unclassified;unclassified;unknown	Bacteria;Proteobacteria;Alphaproteobacteria;Rhizobiales;Methylobacteriaceae;Methylobacterium	Methylobacterium sp. GXF4	extrachromosomal	linear	Cluster_587
Alphaproteobacteria_gi_397770497-26002-77127	hallmark;refseq;vdb	62;25;14;23	Viruses;dsDNA viruses no RNA stage;Caudovirales;Myoviridae;unclassified;unknown	Bacteria;Proteobacteria;Alphaproteobacteria;Rhizobiales;Bartonellaceae;Bartonella	Bartonella sp. DB5-6	prophage	linear	Cluster_203
Alphaproteobacteria_gi_397770507	hallmark;refseq	17;10;3;4	Viruses;dsDNA viruses no RNA stage;Caudovirales;Myoviridae;unknown;unknown	Bacteria;Proteobacteria;Alphaproteobacteria;Rhizobiales;Bartonellaceae;Bartonella	Bartonella sp. DB5-6	extrachromosomal	linear	Cluster_0
Alphaproteobacteria_gi_397770508	hallmark	24;4;2;18	Viruses;dsDNA viruses no RNA stage;Caudovirales;Myoviridae;unknown;unknown	Bacteria;Proteobacteria;Alphaproteobacteria;Rhizobiales;Bartonellaceae;Bartonella	Bartonella sp. DB5-6	extrachromosomal	linear	Cluster_101
Alphaproteobacteria_gi_397770509	hallmark;vdb	19;2;7;10	Viruses;dsDNA viruses no RNA stage;Caudovirales;Siphoviridae;Lambdalikevirus;unknown	Bacteria;Proteobacteria;Alphaproteobacteria;Rhizobiales;Bartonellaceae;Bartonella	Bartonella sp. DB5-6	extrachromosomal	linear	Cluster_203
Alphaproteobacteria_gi_397770539	hallmark	37;13;7;17	Viruses;dsDNA viruses no RNA stage;Caudovirales;Myoviridae;unknown;unknown	Bacteria;Proteobacteria;Alphaproteobacteria;Rhizobiales;Bartonellaceae;Bartonella	Bartonella washoensis 085-0475	extrachromosomal	linear	Cluster_0
Alphaproteobacteria_gi_398379397-12555-50951	hallmark;refseq	50;14;1;35	Viruses;dsDNA viruses no RNA stage;Caudovirales;Podoviridae;unclassified;unknown	Bacteria;Proteobacteria;Alphaproteobacteria;Rhizobiales;Rhizobiaceae;Rhizobium	Rhizobium sp. AP16	prophage	linear	Cluster_454
Alphaproteobacteria_gi_398386603	hallmark	30;4;10;16	Viruses;dsDNA viruses no RNA stage;Caudovirales;Myoviridae;unknown;unknown	Bacteria;Proteobacteria;Alphaproteobacteria;Sphingomonadales;Sphingomonadaceae;Sphingobium	Sphingobium sp. AP49	extrachromosomal	linear	Cluster_531
Alphaproteobacteria_gi_398820691	hallmark	43;10;1;32	Viruses;dsDNA viruses no RNA stage;Caudovirales;Siphoviridae;unknown;unknown	Bacteria;Proteobacteria;Alphaproteobacteria;Rhizobiales;Bradyrhizobiaceae;Bradyrhizobium	Bradyrhizobium sp. YR681	extrachromosomal	linear	Cluster_5
Alphaproteobacteria_gi_398823709	hallmark;refseq	117;28;24;65	Viruses;dsDNA viruses no RNA stage;Caudovirales;unclassified;unclassified;unclassified	Bacteria;Proteobacteria;Alphaproteobacteria;Rhizobiales;Bradyrhizobiaceae;Bradyrhizobium	Bradyrhizobium sp. YR681	extrachromosomal	linear	Cluster_517
Alphaproteobacteria_gi_399063385	hallmark;refseq	18;7;2;9	Viruses;dsDNA viruses no RNA stage;Caudovirales;Siphoviridae;Lambdalikevirus;unknown	Bacteria;Proteobacteria;Alphaproteobacteria;Sphingomonadales;Sphingomonadaceae;Novosphingobium	Novosphingobium sp. AP12	extrachromosomal	linear	Cluster_342
Alphaproteobacteria_gi_402821110-8504-33206	hallmark	43;15;;28	Viruses;dsDNA viruses no RNA stage;Caudovirales;Siphoviridae;unclassified;unknown	Bacteria;Proteobacteria;Alphaproteobacteria;Sphingomonadales;Sphingomonadaceae;Sphingomonas	Sphingomonas sp. LH128	prophage	linear	Cluster_432
Alphaproteobacteria_gi_402821324	hallmark;refseq	43;15;2;26	Viruses;dsDNA viruses no RNA stage;Caudovirales;Podoviridae;unknown;unknown	Bacteria;Proteobacteria;Alphaproteobacteria;Sphingomonadales;Sphingomonadaceae;Sphingomonas	Sphingomonas sp. LH128	extrachromosomal	linear	Cluster_7
Alphaproteobacteria_gi_402850157	hallmark	51;13;6;32	Viruses;dsDNA viruses no RNA stage;Caudovirales;Podoviridae;P22likevirus;unknown	Bacteria;Proteobacteria;Alphaproteobacteria;Rhodobacterales;Rhodobacteraceae;Rhodovulum	Rhodovulum sp. PH10	extrachromosomal	linear	Cluster_570
Alphaproteobacteria_gi_407780245	hallmark	76;16;14;46	Viruses;dsDNA viruses no RNA stage;Caudovirales;Siphoviridae;Lambdalikevirus;unknown	Bacteria;Proteobacteria;Alphaproteobacteria;Rhizobiales;Phyllobacteriaceae;Nitratireductor	Nitratireductor pacificus pht-3B	extrachromosomal	linear	Cluster_201
Alphaproteobacteria_gi_407780934-153693-193855	hallmark;refseq;vdb	59;23;8;28	Viruses;dsDNA viruses no RNA stage;Caudovirales;Myoviridae;Mulikevirus;unknown	Bacteria;Proteobacteria;Alphaproteobacteria;Rhodospirillales;Rhodospirillaceae;Oceanibaculum	Oceanibaculum indicum P24	prophage	linear	Cluster_3
Alphaproteobacteria_gi_407783993	hallmark;refseq	41;19;4;18	Viruses;dsDNA viruses no RNA stage;Caudovirales;Siphoviridae;unclassified;unknown	Bacteria;Proteobacteria;Alphaproteobacteria;Rhodospirillales;Rhodospirillaceae;Oceanibaculum	Oceanibaculum indicum P24	extrachromosomal	linear	Cluster_20
Alphaproteobacteria_gi_407800646	hallmark	17;4;4;9	Viruses;dsDNA viruses no RNA stage;Caudovirales;Siphoviridae;Lambdalikevirus;unknown	Bacteria;Proteobacteria;Alphaproteobacteria;Rhodobacterales;Rhodobacteraceae;Oceaniovalibus	Oceaniovalibus guishaninsula JLT2003	extrachromosomal	linear	Cluster_136
Alphaproteobacteria_gi_407977313	hallmark;refseq	21;12;1;8	Viruses;dsDNA viruses no RNA stage;Caudovirales;Siphoviridae;Lambdalikevirus;unknown	Bacteria;Proteobacteria;Alphaproteobacteria;Rhizobiales;Phyllobacteriaceae;Nitratireductor	Nitratireductor indicus C115	extrachromosomal	linear	Cluster_4
Alphaproteobacteria_gi_407977335	hallmark;refseq	20;10;2;8	Viruses;dsDNA viruses no RNA stage;Caudovirales;Siphoviridae;Lambdalikevirus;unknown	Bacteria;Proteobacteria;Alphaproteobacteria;Rhizobiales;Phyllobacteriaceae;Nitratireductor	Nitratireductor indicus C115	extrachromosomal	linear	Cluster_218
Alphaproteobacteria_gi_410651360	hallmark	47;12;5;30	Viruses;dsDNA viruses no RNA stage;Caudovirales;Siphoviridae;Lambdalikevirus;unknown	Bacteria;Proteobacteria;Alphaproteobacteria;Rhodospirillales;Acetobacteraceae;Gluconobacter	Gluconobacter frateurii NBRC 101659	extrachromosomal	linear	Cluster_376
Alphaproteobacteria_gi_418057449	hallmark;refseq	114;28;17;69	Viruses;dsDNA viruses no RNA stage;Caudovirales;unclassified;unknown;unknown	Bacteria;Proteobacteria;Alphaproteobacteria;Rhizobiales;Methylobacteriaceae;Methylobacterium	Methylobacterium extorquens DSM 13060	extrachromosomal	linear	Cluster_177
Alphaproteobacteria_gi_418061159	hallmark	21;6;7;8	Viruses;dsDNA viruses no RNA stage;Caudovirales;Myoviridae;unknown;unknown	Bacteria;Proteobacteria;Alphaproteobacteria;Rhizobiales;Methylobacteriaceae;Methylobacterium	Methylobacterium extorquens DSM 13060	extrachromosomal	linear	Cluster_19
Alphaproteobacteria_gi_418403387-0-30091	hallmark;refseq	36;16;2;18	Viruses;dsDNA viruses no RNA stage;unclassified;unclassified;unclassified;unknown	Bacteria;Proteobacteria;Alphaproteobacteria;Rhizobiales;Rhizobiaceae;Sinorhizobium	Sinorhizobium meliloti CCNWSX0020	prophage	linear	Cluster_352
Alphaproteobacteria_gi_418938031-6048-43633	hallmark	58;18;10;30	Viruses;dsDNA viruses no RNA stage;Caudovirales;unclassified;unclassified;unknown	Bacteria;Proteobacteria;Alphaproteobacteria;Rhizobiales;Rhizobiaceae;Rhizobium	Rhizobium sp. PDO1-076	prophage	linear	Cluster_3
Alphaproteobacteria_gi_421760367	hallmark	41;7;10;24	Viruses;dsDNA viruses no RNA stage;Caudovirales;unclassified;unclassified;unclassified	Bacteria;Proteobacteria;Alphaproteobacteria;Rhizobiales;Bartonellaceae;Bartonella	Bartonella bacilliformis INS	extrachromosomal	linear	Cluster_203
Alphaproteobacteria_gi_421853582	hallmark	30;9;10;11	Viruses;dsDNA viruses no RNA stage;Caudovirales;Siphoviridae;Lambdalikevirus;unknown	Bacteria;Proteobacteria;Alphaproteobacteria;Rhodospirillales;Acetobacteraceae;Acetobacter	Acetobacter pasteurianus subsp. pasteurianus LMG 1262 = NBRC 106471	extrachromosomal	linear	Cluster_1
Alphaproteobacteria_gi_444308382	hallmark	55;14;5;36	Viruses;dsDNA viruses no RNA stage;Caudovirales;unclassified;unclassified;unknown	Bacteria;Proteobacteria;Alphaproteobacteria;Rhizobiales;Brucellaceae;Ochrobactrum	Ochrobactrum intermedium M86	extrachromosomal	linear	Cluster_507
Alphaproteobacteria_gi_444310867	hallmark	35;8;1;26	Viruses;dsDNA viruses no RNA stage;Caudovirales;Myoviridae;unknown;unknown	Bacteria;Proteobacteria;Alphaproteobacteria;Rhizobiales;Brucellaceae;Ochrobactrum	Ochrobactrum intermedium M86	extrachromosomal	linear	Cluster_507
Alphaproteobacteria_gi_444312596	hallmark	71;18;6;47	Viruses;dsDNA viruses no RNA stage;Caudovirales;Siphoviridae;Tunalikevirus;unknown	Bacteria;Proteobacteria;Alphaproteobacteria;Rhizobiales;Brucellaceae;Ochrobactrum	Ochrobactrum intermedium M86	extrachromosomal	linear	Cluster_177
Alphaproteobacteria_gi_451941309-854790-896321	hallmark;refseq	48;28;7;13	Viruses;dsDNA viruses no RNA stage;Caudovirales;unclassified;unclassified;unknown	Bacteria;Proteobacteria;Alphaproteobacteria;Rhizobiales;Bartonellaceae;Bartonella	Bartonella vinsonii subsp. berkhoffii str. Winnie	prophage	linear	Cluster_101
Alphaproteobacteria_gi_458907243	hallmark	75;17;26;32	Viruses;dsDNA viruses no RNA stage;Caudovirales;unclassified;unclassified;unclassified	Bacteria;Proteobacteria;Alphaproteobacteria;Rhodospirillales;Rhodospirillaceae;Magnetospirillum	Magnetospirillum sp. SO-1	extrachromosomal	linear	Cluster_168
Alphaproteobacteria_gi_458920821	hallmark;vdb	14;2;4;8	Viruses;dsDNA viruses no RNA stage;Caudovirales;Siphoviridae;Lambdalikevirus;unknown	Bacteria;Proteobacteria;Alphaproteobacteria;Rhodospirillales;Rhodospirillaceae;Magnetospirillum	Magnetospirillum sp. SO-1	extrachromosomal	linear	Cluster_136
Alphaproteobacteria_gi_458921628	hallmark	21;3;5;13	Viruses;dsDNA viruses no RNA stage;Caudovirales;unclassified;unclassified;unknown	Bacteria;Proteobacteria;Alphaproteobacteria;Rhodospirillales;Rhodospirillaceae;Magnetospirillum	Magnetospirillum sp. SO-1	extrachromosomal	linear	Cluster_571
Alphaproteobacteria_gi_459021726-69921-90619	hallmark;vdb	23;7;6;10	Viruses;dsDNA viruses no RNA stage;Caudovirales;Siphoviridae;Lambdalikevirus;unknown	Bacteria;Proteobacteria;Alphaproteobacteria;Rhodospirillales;Acetobacteraceae;Gluconobacter	Gluconobacter thailandicus NBRC 3255	prophage	linear	Cluster_3
Alphaproteobacteria_gi_459785094	hallmark;refseq	48;24;5;19	Viruses;dsDNA viruses no RNA stage;Caudovirales;unclassified;unclassified;unknown	Bacteria;Proteobacteria;Alphaproteobacteria;Rhizobiales;Brucellaceae;Ochrobactrum	Ochrobactrum sp. CDB2	extrachromosomal	linear	Cluster_218
Alphaproteobacteria_gi_476522928	hallmark;refseq	11;9;;2	Viruses;dsDNA viruses no RNA stage;Caudovirales;Podoviridae;unknown;unknown	Bacteria;Proteobacteria;Alphaproteobacteria;Rhizobiales;Rhizobiaceae;Candidatus Liberibacter	Candidatus Liberibacter americanus PW_SP	extrachromosomal	linear	Cluster_260
Alphaproteobacteria_gi_476522950	hallmark;refseq	7;7;;	Viruses;dsDNA viruses no RNA stage;Caudovirales;Podoviridae;unknown;unknown	Bacteria;Proteobacteria;Alphaproteobacteria;Rhizobiales;Rhizobiaceae;Candidatus Liberibacter	Candidatus Liberibacter americanus PW_SP	extrachromosomal	linear	Cluster_260
Alphaproteobacteria_gi_476522964	refseq	7;5;;2	Viruses;dsDNA viruses no RNA stage;Caudovirales;Podoviridae;unknown;unknown	Bacteria;Proteobacteria;Alphaproteobacteria;Rhizobiales;Rhizobiaceae;Candidatus Liberibacter	Candidatus Liberibacter americanus PW_SP	extrachromosomal	linear	Cluster_260
Alphaproteobacteria_gi_482743784	hallmark	42;7;3;32	Viruses;dsDNA viruses no RNA stage;Caudovirales;unclassified;unclassified;unknown	Bacteria;Proteobacteria;Alphaproteobacteria;Sphingomonadales;Sphingomonadaceae;Sphingomonas	Sphingomonas wittichii DP58	extrachromosomal	linear	Cluster_379
Alphaproteobacteria_gi_482759443	hallmark	57;14;;43	Viruses;dsDNA viruses no RNA stage;Caudovirales;Podoviridae;unknown;unknown	Bacteria;Proteobacteria;Alphaproteobacteria;Sphingomonadales;Sphingomonadaceae;Sphingomonas	Sphingomonas wittichii DP58	extrachromosomal	linear	Cluster_547
Alphaproteobacteria_gi_482992239	hallmark;vdb	26;1;7;18	Viruses;dsDNA viruses no RNA stage;Caudovirales;Siphoviridae;Lambdalikevirus;unknown	Bacteria;Proteobacteria;Alphaproteobacteria;Rhizobiales;Methylobacteriaceae;Methylobacterium	Methylobacterium sp. WSM2598	extrachromosomal	circular	Cluster_1
Alphaproteobacteria_gi_483319666	hallmark	14;1;3;10	Viruses;dsDNA viruses no RNA stage;Caudovirales;Siphoviridae;Tunalikevirus;unknown	Bacteria;Proteobacteria;Alphaproteobacteria;Rhizobiales;Bradyrhizobiaceae;Bradyrhizobium	Bradyrhizobium japonicum WSM2793	extrachromosomal	linear	Cluster_510
Alphaproteobacteria_gi_483807038	hallmark	69;14;14;41	Viruses;dsDNA viruses no RNA stage;Caudovirales;Siphoviridae;Lambdalikevirus;unknown	Bacteria;Proteobacteria;Alphaproteobacteria;Rhodospirillales;Acetobacteraceae;Komagataeibacter	Gluconacetobacter europaeus LMG 18890	extrachromosomal	circular	Cluster_3
Alphaproteobacteria_gi_483831584	hallmark	15;3;1;11	Viruses;dsDNA viruses no RNA stage;Caudovirales;Myoviridae;Punalikevirus;unknown	Bacteria;Proteobacteria;Alphaproteobacteria;Rhodospirillales;Acetobacteraceae;Acetobacter	Acetobacter pasteurianus 3P3	extrachromosomal	linear	Cluster_395
Alphaproteobacteria_gi_483832087	hallmark	12;5;;7	Viruses;dsDNA viruses no RNA stage;Caudovirales;Siphoviridae;Lambdalikevirus;unknown	Bacteria;Proteobacteria;Alphaproteobacteria;Rhodospirillales;Acetobacteraceae;Acetobacter	Acetobacter pasteurianus 3P3	extrachromosomal	linear	Cluster_376
Alphaproteobacteria_gi_483839584	hallmark	46;5;8;33	Viruses;dsDNA viruses no RNA stage;Caudovirales;Siphoviridae;unknown;unknown	Bacteria;Proteobacteria;Alphaproteobacteria;Rhodospirillales;Acetobacteraceae;Komagataeibacter	Gluconacetobacter europaeus 5P3	extrachromosomal	linear	Cluster_395
Alphaproteobacteria_gi_483839739	hallmark	56;7;5;44	Viruses;dsDNA viruses no RNA stage;Caudovirales;unclassified;unclassified;unclassified	Bacteria;Proteobacteria;Alphaproteobacteria;Rhodospirillales;Acetobacteraceae;Komagataeibacter	Gluconacetobacter europaeus 5P3	extrachromosomal	linear	Cluster_395
Alphaproteobacteria_gi_483995603	hallmark	39;9;8;22	Viruses;dsDNA viruses no RNA stage;Caudovirales;Siphoviridae;unclassified;unknown	Bacteria;Proteobacteria;Alphaproteobacteria;Rhizobiales;Methylobacteriaceae;Meganema	Meganema perideroedes DSM 15528	extrachromosomal	circular	Cluster_126
Alphaproteobacteria_gi_483997032	hallmark	61;15;7;39	Viruses;dsDNA viruses no RNA stage;Caudovirales;Siphoviridae;unknown;unknown	Bacteria;Proteobacteria;Alphaproteobacteria;unknown;unknown;unknown	alpha proteobacterium LLX12A	extrachromosomal	linear	Cluster_4
Alphaproteobacteria_gi_483997090	hallmark	41;7;16;18	Viruses;dsDNA viruses no RNA stage;Caudovirales;unclassified;unclassified;unknown	Bacteria;Proteobacteria;Alphaproteobacteria;unknown;unknown;unknown	alpha proteobacterium LLX12A	extrachromosomal	linear	Cluster_531
Alphaproteobacteria_gi_483997275	hallmark;refseq	20;7;4;9	Viruses;dsDNA viruses no RNA stage;Caudovirales;Siphoviridae;Lambdalikevirus;unknown	Bacteria;Proteobacteria;Alphaproteobacteria;unknown;unknown;unknown	alpha proteobacterium LLX12A	extrachromosomal	linear	Cluster_3
Alphaproteobacteria_gi_484006205	refseq	5;4;1;	Viruses;dsDNA viruses no RNA stage;Caudovirales;unclassified;;unclassified	Bacteria;Proteobacteria;Alphaproteobacteria;Rickettsiales;Anaplasmataceae;Wolbachia	Wolbachia endosymbiont of Diaphorina citri	extrachromosomal	linear	Cluster_181
Alphaproteobacteria_gi_484041859	hallmark;refseq	30;17;6;7	Viruses;dsDNA viruses no RNA stage;Caudovirales;unclassified;unclassified;unknown	Bacteria;Proteobacteria;Alphaproteobacteria;Rhizobiales;Bartonellaceae;Bartonella	Bartonella rattaustraliani AUST/NH4	extrachromosomal	linear	Cluster_101
Alphaproteobacteria_gi_484042143	hallmark	23;8;3;12	Viruses;dsDNA viruses no RNA stage;Caudovirales;Siphoviridae;unknown;unknown	Bacteria;Proteobacteria;Alphaproteobacteria;Rhizobiales;Bartonellaceae;Bartonella	Bartonella rattaustraliani AUST/NH4	extrachromosomal	linear	Cluster_136
Alphaproteobacteria_gi_484042176	hallmark;refseq	26;14;6;6	Viruses;dsDNA viruses no RNA stage;Caudovirales;Myoviridae;unknown;unknown	Bacteria;Proteobacteria;Alphaproteobacteria;Rhizobiales;Bartonellaceae;Bartonella	Bartonella rattaustraliani AUST/NH4	extrachromosomal	linear	Cluster_0
Alphaproteobacteria_gi_484042631	hallmark	44;12;12;20	Viruses;dsDNA viruses no RNA stage;Caudovirales;unclassified;unclassified;unclassified	Bacteria;Proteobacteria;Alphaproteobacteria;Rhizobiales;Bartonellaceae;Bartonella	Bartonella rattimassiliensis 15908	extrachromosomal	linear	Cluster_203
Alphaproteobacteria_gi_484042655	hallmark;refseq	35;20;3;12	Viruses;dsDNA viruses no RNA stage;Caudovirales;unclassified;unclassified;unknown	Bacteria;Proteobacteria;Alphaproteobacteria;Rhizobiales;Bartonellaceae;Bartonella	Bartonella rattimassiliensis 15908	extrachromosomal	linear	Cluster_101
Alphaproteobacteria_gi_484042709	hallmark	22;9;6;7	Viruses;dsDNA viruses no RNA stage;Caudovirales;Myoviridae;unclassified;unknown	Bacteria;Proteobacteria;Alphaproteobacteria;Rhizobiales;Bartonellaceae;Bartonella	Bartonella rattimassiliensis 15908	extrachromosomal	linear	Cluster_203
Alphaproteobacteria_gi_484075156-0-39986	hallmark;refseq	60;28;4;28	Viruses;dsDNA viruses no RNA stage;Caudovirales;unclassified;unknown;unknown	Bacteria;Proteobacteria;Alphaproteobacteria;Rhodospirillales;Acetobacteraceae;Saccharibacter	Saccharibacter floricola DSM 15669	prophage	linear	Cluster_54
Alphaproteobacteria_gi_484075262	hallmark	54;3;3;48	Viruses;dsDNA viruses no RNA stage;Caudovirales;Myoviridae;;unknown	Bacteria;Proteobacteria;Alphaproteobacteria;Rhodospirillales;Acetobacteraceae;Saccharibacter	Saccharibacter floricola DSM 15669	extrachromosomal	linear	Cluster_259
Alphaproteobacteria_gi_484075274	hallmark	48;8;15;25	Viruses;dsDNA viruses no RNA stage;Caudovirales;unclassified;unclassified;unknown	Bacteria;Proteobacteria;Alphaproteobacteria;Rhodospirillales;Acetobacteraceae;Saccharibacter	Saccharibacter floricola DSM 15669	extrachromosomal	linear	Cluster_3
Alphaproteobacteria_gi_484115409	hallmark	13;5;2;6	Viruses;dsDNA viruses no RNA stage;Caudovirales;Siphoviridae;Phic3unalikevirus;unknown	Bacteria;Proteobacteria;Alphaproteobacteria;Sphingomonadales;Sphingomonadaceae;unknown	Sphingomonas-like bacterium B12	extrachromosomal	linear	Cluster_136
Alphaproteobacteria_gi_484132260	hallmark;refseq	11;7;1;3	Viruses;dsDNA viruses no RNA stage;Caudovirales;Myoviridae;Mulikevirus;unknown	Bacteria;Proteobacteria;Alphaproteobacteria;Rhizobiales;Bradyrhizobiaceae;Rhodopseudomonas	Rhodopseudomonas sp. B29	extrachromosomal	linear	Cluster_3
Alphaproteobacteria_gi_484132262	hallmark	22;7;5;10	Viruses;dsDNA viruses no RNA stage;Caudovirales;unclassified;unclassified;unknown	Bacteria;Proteobacteria;Alphaproteobacteria;Rhizobiales;Bradyrhizobiaceae;Rhodopseudomonas	Rhodopseudomonas sp. B29	extrachromosomal	linear	Cluster_301
Alphaproteobacteria_gi_484196661	hallmark	25;5;8;12	Viruses;dsDNA viruses no RNA stage;Caudovirales;Siphoviridae;Lambdalikevirus;unknown	Bacteria;Proteobacteria;Alphaproteobacteria;Rhodobacterales;Rhodobacteraceae;Loktanella	Loktanella hongkongensis DSM 17492	extrachromosomal	circular	Cluster_20
Alphaproteobacteria_gi_484205927	refseq	19;8;;11	Viruses;dsDNA viruses no RNA stage;Caudovirales;Siphoviridae;unknown;unknown	Bacteria;Proteobacteria;Alphaproteobacteria;Rhizobiales;Rhizobiaceae;Sinorhizobium	Sinorhizobium medicae WSM1369	extrachromosomal	linear	Cluster_137
Alphaproteobacteria_gi_484205957	refseq	22;11;;11	Viruses;dsDNA viruses no RNA stage;Caudovirales;unclassified;unclassified;unknown	Bacteria;Proteobacteria;Alphaproteobacteria;Rhizobiales;Rhizobiaceae;Sinorhizobium	Sinorhizobium medicae WSM1369	extrachromosomal	linear	Cluster_301
Alphaproteobacteria_gi_484205980	hallmark	22;7;3;12	Viruses;dsDNA viruses no RNA stage;unclassified;unclassified;unknown;unknown	Bacteria;Proteobacteria;Alphaproteobacteria;Rhizobiales;Rhizobiaceae;Sinorhizobium	Sinorhizobium medicae WSM1369	extrachromosomal	linear	Cluster_177
Alphaproteobacteria_gi_484225362-0-14781	refseq	24;11;3;10	Viruses;dsDNA viruses no RNA stage;Caudovirales;Siphoviridae;unknown;unknown	Bacteria;Proteobacteria;Alphaproteobacteria;Caulobacterales;Caulobacteraceae;Caulobacter	Caulobacter sp. JGI 0001013-O16	prophage	linear	unclustered
Alphaproteobacteria_gi_484225386-4307-26230	hallmark;vdb	27;6;3;18	Viruses;dsDNA viruses no RNA stage;Caudovirales;Siphoviridae;Lambdalikevirus;unknown	Bacteria;Proteobacteria;Alphaproteobacteria;Caulobacterales;Caulobacteraceae;Caulobacter	Caulobacter sp. JGI 0001013-O16	prophage	linear	Cluster_1
Alphaproteobacteria_gi_484226341-0-28070	hallmark;refseq	36;20;5;11	Viruses;dsDNA viruses no RNA stage;Caudovirales;Myoviridae;Hpunalikevirus;unknown	Bacteria;Proteobacteria;Alphaproteobacteria;Sphingomonadales;Sphingomonadaceae;Novosphingobium	Novosphingobium nitrogenifigens DSM 19370	prophage	linear	Cluster_0
Alphaproteobacteria_gi_484235208	hallmark	62;15;5;42	Viruses;dsDNA viruses no RNA stage;Caudovirales;Podoviridae;P22likevirus;unknown	Bacteria;Proteobacteria;Alphaproteobacteria;Rhizobiales;Rhizobiaceae;Kaistia	Kaistia granuli DSM 23481	extrachromosomal	circular	Cluster_570
Alphaproteobacteria_gi_484345497	hallmark	49;13;10;26	Viruses;dsDNA viruses no RNA stage;Caudovirales;Siphoviridae;Lambdalikevirus;unknown	Bacteria;Proteobacteria;Alphaproteobacteria;Rhizobiales;Rhizobiaceae;Sinorhizobium	Sinorhizobium meliloti H1	extrachromosomal	linear	Cluster_201
Alphaproteobacteria_gi_484345843	hallmark	49;13;10;26	Viruses;dsDNA viruses no RNA stage;Caudovirales;Siphoviridae;Lambdalikevirus;unknown	Bacteria;Proteobacteria;Alphaproteobacteria;Rhizobiales;Rhizobiaceae;Sinorhizobium	Sinorhizobium meliloti H1	extrachromosomal	linear	Cluster_201
Alphaproteobacteria_gi_484345884	hallmark;refseq	28;11;4;13	Viruses;dsDNA viruses no RNA stage;Caudovirales;Myoviridae;unknown;unknown	Bacteria;Proteobacteria;Alphaproteobacteria;Rhizobiales;Rhizobiaceae;Sinorhizobium	Sinorhizobium meliloti C0438LL	extrachromosomal	linear	Cluster_177
Alphaproteobacteria_gi_484346346-99-20515	hallmark;refseq	29;16;2;11	Viruses;dsDNA viruses no RNA stage;Caudovirales;unclassified;unclassified;unknown	Bacteria;Proteobacteria;Alphaproteobacteria;Rhizobiales;Rhizobiaceae;Sinorhizobium	Sinorhizobium meliloti C0438LL	prophage	linear	Cluster_301
Alphaproteobacteria_gi_484346722	hallmark	19;4;4;11	Viruses;dsDNA viruses no RNA stage;Caudovirales;Siphoviridae;unknown;unknown	Bacteria;Proteobacteria;Alphaproteobacteria;Rhizobiales;Rhizobiaceae;Sinorhizobium	Sinorhizobium meliloti C0431A	extrachromosomal	linear	Cluster_201
Alphaproteobacteria_gi_484347313-2-32895	hallmark;refseq	42;12;4;26	Viruses;dsDNA viruses no RNA stage;Caudovirales;Podoviridae;unclassified;unknown	Bacteria;Proteobacteria;Alphaproteobacteria;Rhizobiales;Rhizobiaceae;Sinorhizobium	Sinorhizobium meliloti C0431A	prophage	linear	Cluster_563
Alphaproteobacteria_gi_484348689	hallmark;refseq	52;20;;32	Viruses;dsDNA viruses no RNA stage;unclassified;unclassified;unclassified;unknown	Bacteria;Proteobacteria;Alphaproteobacteria;Rhizobiales;Rhizobiaceae;Sinorhizobium	Sinorhizobium meliloti AK75	extrachromosomal	linear	Cluster_352
Alphaproteobacteria_gi_484349127	hallmark;vdb	18;2;6;10	Viruses;dsDNA viruses no RNA stage;Caudovirales;Siphoviridae;Lambdalikevirus;unknown	Bacteria;Proteobacteria;Alphaproteobacteria;Rhizobiales;Rhizobiaceae;Sinorhizobium	Sinorhizobium meliloti AK11	extrachromosomal	linear	Cluster_42
Alphaproteobacteria_gi_484349863	hallmark	78;16;13;49	Viruses;dsDNA viruses no RNA stage;Caudovirales;Siphoviridae;Lambdalikevirus;unknown	Bacteria;Proteobacteria;Alphaproteobacteria;Rhizobiales;Rhizobiaceae;Sinorhizobium	Sinorhizobium meliloti AE608H	extrachromosomal	linear	Cluster_349
Alphaproteobacteria_gi_484350062	hallmark	18;4;5;9	Viruses;dsDNA viruses no RNA stage;Caudovirales;Siphoviridae;Lambdalikevirus;unknown	Bacteria;Proteobacteria;Alphaproteobacteria;Rhizobiales;Rhizobiaceae;Sinorhizobium	Sinorhizobium meliloti AE608H	extrachromosomal	linear	Cluster_201
Alphaproteobacteria_gi_484350120	hallmark;refseq	23;9;5;9	Viruses;dsDNA viruses no RNA stage;Caudovirales;Myoviridae;unknown;unknown	Bacteria;Proteobacteria;Alphaproteobacteria;Rhizobiales;Rhizobiaceae;Sinorhizobium	Sinorhizobium meliloti AE608H	extrachromosomal	linear	Cluster_177
Alphaproteobacteria_gi_484350290	hallmark;refseq	33;11;4;18	Viruses;dsDNA viruses no RNA stage;Caudovirales;Siphoviridae;unknown;unknown	Bacteria;Proteobacteria;Alphaproteobacteria;Rhizobiales;Rhizobiaceae;Sinorhizobium	Sinorhizobium meliloti AE608H	extrachromosomal	linear	Cluster_432
Alphaproteobacteria_gi_484350991	hallmark	16;5;4;7	Viruses;dsDNA viruses no RNA stage;Caudovirales;Siphoviridae;Lambdalikevirus;unknown	Bacteria;Proteobacteria;Alphaproteobacteria;Rhizobiales;Rhizobiaceae;Sinorhizobium	Sinorhizobium meliloti A0643DD	extrachromosomal	linear	Cluster_201
Alphaproteobacteria_gi_484351058	hallmark	16;5;4;7	Viruses;dsDNA viruses no RNA stage;Caudovirales;Siphoviridae;Lambdalikevirus;unknown	Bacteria;Proteobacteria;Alphaproteobacteria;Rhizobiales;Rhizobiaceae;Sinorhizobium	Sinorhizobium meliloti A0643DD	extrachromosomal	linear	Cluster_201
Alphaproteobacteria_gi_484351429	hallmark	15;5;;10	Viruses;dsDNA viruses no RNA stage;Caudovirales;Siphoviridae;Lambdalikevirus;unknown	Bacteria;Proteobacteria;Alphaproteobacteria;Rhizobiales;Rhizobiaceae;Sinorhizobium	Sinorhizobium meliloti A0641M	extrachromosomal	linear	Cluster_436
Alphaproteobacteria_gi_484351531-3486-47539	hallmark	51;12;9;30	Viruses;dsDNA viruses no RNA stage;Caudovirales;Siphoviridae;Lambdalikevirus;unknown	Bacteria;Proteobacteria;Alphaproteobacteria;Rhizobiales;Rhizobiaceae;Sinorhizobium	Sinorhizobium meliloti A0641M	prophage	linear	Cluster_349
Alphaproteobacteria_gi_484351542	hallmark	15;5;;10	Viruses;dsDNA viruses no RNA stage;Caudovirales;Siphoviridae;Lambdalikevirus;unknown	Bacteria;Proteobacteria;Alphaproteobacteria;Rhizobiales;Rhizobiaceae;Sinorhizobium	Sinorhizobium meliloti A0641M	extrachromosomal	linear	Cluster_436
Alphaproteobacteria_gi_484351824	hallmark;refseq	37;13;3;21	Viruses;dsDNA viruses no RNA stage;Caudovirales;unclassified;unknown;unknown	Bacteria;Proteobacteria;Alphaproteobacteria;Rhizobiales;Rhizobiaceae;Sinorhizobium	Sinorhizobium meliloti A0641M	extrachromosomal	linear	Cluster_432
Alphaproteobacteria_gi_484351870	hallmark;refseq	16;7;;9	Viruses;dsDNA viruses no RNA stage;Caudovirales;Siphoviridae;Lambdalikevirus;unknown	Bacteria;Proteobacteria;Alphaproteobacteria;Rhizobiales;Rhizobiaceae;Sinorhizobium	Sinorhizobium meliloti A0641M	extrachromosomal	linear	Cluster_4
Alphaproteobacteria_gi_484351963	hallmark	45;8;10;27	Viruses;dsDNA viruses no RNA stage;Caudovirales;Siphoviridae;Lambdalikevirus;unknown	Bacteria;Proteobacteria;Alphaproteobacteria;Rhizobiales;Rhizobiaceae;Sinorhizobium	Sinorhizobium meliloti A0641M	extrachromosomal	linear	Cluster_349
Alphaproteobacteria_gi_484352290	hallmark	24;9;4;11	Viruses;dsDNA viruses no RNA stage;Caudovirales;Myoviridae;unknown;unknown	Bacteria;Proteobacteria;Alphaproteobacteria;Rhizobiales;Rhizobiaceae;Sinorhizobium	Sinorhizobium meliloti 5A14	extrachromosomal	linear	Cluster_177
Alphaproteobacteria_gi_484352338	hallmark	24;9;4;11	Viruses;dsDNA viruses no RNA stage;Caudovirales;Myoviridae;unknown;unknown	Bacteria;Proteobacteria;Alphaproteobacteria;Rhizobiales;Rhizobiaceae;Sinorhizobium	Sinorhizobium meliloti 5A14	extrachromosomal	linear	Cluster_177
Alphaproteobacteria_gi_484352401	hallmark	21;8;3;10	Viruses;dsDNA viruses no RNA stage;unclassified;unclassified;unknown;unknown	Bacteria;Proteobacteria;Alphaproteobacteria;Rhizobiales;Rhizobiaceae;Sinorhizobium	Sinorhizobium meliloti 5A14	extrachromosomal	linear	Cluster_177
Alphaproteobacteria_gi_484352444	hallmark	11;2;1;8	Viruses;dsDNA viruses no RNA stage;Caudovirales;Siphoviridae;Lambdalikevirus;unknown	Bacteria;Proteobacteria;Alphaproteobacteria;Rhizobiales;Rhizobiaceae;Sinorhizobium	Sinorhizobium meliloti 5A14	extrachromosomal	linear	Cluster_349
Alphaproteobacteria_gi_484352467-8296-37690	hallmark	34;10;2;22	Viruses;dsDNA viruses no RNA stage;Caudovirales;Podoviridae;unknown;unknown	Bacteria;Proteobacteria;Alphaproteobacteria;Rhizobiales;Rhizobiaceae;Sinorhizobium	Sinorhizobium meliloti 5A14	prophage	linear	Cluster_352
Alphaproteobacteria_gi_484352955-0-41431	hallmark;refseq	55;17;5;33	Viruses;dsDNA viruses no RNA stage;unclassified;unclassified;unclassified;unknown	Bacteria;Proteobacteria;Alphaproteobacteria;Rhizobiales;Rhizobiaceae;Sinorhizobium	Sinorhizobium meliloti 1A42	prophage	linear	Cluster_352
Alphaproteobacteria_gi_484353035	hallmark;vdb	16;3;1;12	Viruses;dsDNA viruses no RNA stage;Caudovirales;unclassified;;unclassified	Bacteria;Proteobacteria;Alphaproteobacteria;Rhizobiales;Rhizobiaceae;Sinorhizobium	Sinorhizobium meliloti 1A42	extrachromosomal	linear	unclustered
Alphaproteobacteria_gi_485046112-0-21388	hallmark	35;11;;24	Viruses;dsDNA viruses no RNA stage;Caudovirales;Siphoviridae;Lambdalikevirus;unknown	Bacteria;Proteobacteria;Alphaproteobacteria;Sphingomonadales;Sphingomonadaceae;Sphingomonas	Sphingomonas sp. ATCC 31555	prophage	linear	Cluster_4
Alphaproteobacteria_gi_485050827-10807-62500	hallmark;vdb	63;17;7;39	Viruses;dsDNA viruses no RNA stage;Caudovirales;Siphoviridae;unknown;unknown	Bacteria;Proteobacteria;Alphaproteobacteria;Rhizobiales;Beijerinckiaceae;Chelatococcus	Chelatococcus sp. GW1	prophage	linear	Cluster_17
Alphaproteobacteria_gi_485068261	hallmark;refseq	46;24;4;18	Viruses;dsDNA viruses no RNA stage;Caudovirales;Myoviridae;Hpunalikevirus;unknown	Bacteria;Proteobacteria;Alphaproteobacteria;Sphingomonadales;Sphingomonadaceae;Sphingomonas	Sphingomonas sp. Mn802worker	extrachromosomal	linear	Cluster_0
Alphaproteobacteria_gi_485071565	hallmark;refseq	90;42;7;41	Viruses;dsDNA viruses no RNA stage;Caudovirales;Siphoviridae;unclassified;unknown	Bacteria;Proteobacteria;Alphaproteobacteria;Rhizobiales;Rhizobiaceae;Agrobacterium	Agrobacterium sp. 10MFCol1.1	extrachromosomal	circular	Cluster_218
Alphaproteobacteria_gi_485071566	hallmark	71;10;5;56	Viruses;dsDNA viruses no RNA stage;Caudovirales;Podoviridae;P22likevirus;unknown	Bacteria;Proteobacteria;Alphaproteobacteria;Rhizobiales;Rhizobiaceae;Agrobacterium	Agrobacterium sp. 10MFCol1.1	extrachromosomal	circular	Cluster_203
Alphaproteobacteria_gi_485091527-14351-46301	hallmark;refseq	45;23;7;15	Viruses;dsDNA viruses no RNA stage;Caudovirales;Myoviridae;unclassified;unknown	Bacteria;Proteobacteria;Alphaproteobacteria;Rhodospirillales;Rhodospirillaceae;Novispirillum	Novispirillum itersonii subsp. itersonii ATCC 12639	prophage	linear	Cluster_0
Alphaproteobacteria_gi_485099451	hallmark	68;12;19;37	Viruses;dsDNA viruses no RNA stage;Caudovirales;Siphoviridae;unclassified;unknown	Bacteria;Proteobacteria;Alphaproteobacteria;Rhodobacterales;Rhodobacteraceae;Loktanella	Loktanella vestfoldensis DSM 16212	extrachromosomal	linear	Cluster_136
Alphaproteobacteria_gi_486307128-0-45017	hallmark	77;15;3;59	Viruses;dsDNA viruses no RNA stage;Caudovirales;unclassified;unclassified;unknown	Bacteria;Proteobacteria;Alphaproteobacteria;Caulobacterales;Caulobacteraceae;Caulobacter	Caulobacter sp. JGI 0001010-J14	prophage	linear	Cluster_455
Alphaproteobacteria_gi_486351604	refseq;vdb	35;10;6;19	Viruses;unclassified;unclassified;unclassified;unclassified;unknown	Bacteria;Proteobacteria;Alphaproteobacteria;unknown;unknown;unknown	alpha proteobacterium SCGC AAA300-J04	extrachromosomal	linear	unclustered
Alphaproteobacteria_gi_486400337-6784-43731	hallmark	50;12;6;32	Viruses;dsDNA viruses no RNA stage;Caudovirales;unclassified;unclassified;unknown	Bacteria;Proteobacteria;Alphaproteobacteria;Rhizobiales;Aurantimonadaceae;Aureimonas	Aureimonas ureilytica DSM 18598	prophage	linear	Cluster_0
Alphaproteobacteria_gi_486400373	hallmark;refseq	46;13;3;30	Viruses;dsDNA viruses no RNA stage;Caudovirales;Siphoviridae;Lambdalikevirus;unknown	Bacteria;Proteobacteria;Alphaproteobacteria;Rhizobiales;Aurantimonadaceae;Aureimonas	Aureimonas ureilytica DSM 18598	extrachromosomal	linear	Cluster_342
Alphaproteobacteria_gi_486400801-1185-10398	refseq	15;8;2;5	Viruses;dsDNA viruses no RNA stage;Caudovirales;Siphoviridae;unknown;unknown	Bacteria;Proteobacteria;Alphaproteobacteria;Rhizobiales;Aurantimonadaceae;Aureimonas	Aureimonas ureilytica DSM 18598	prophage	linear	Cluster_218
Alphaproteobacteria_gi_486421658	refseq	28;12;;16	Viruses;dsDNA viruses no RNA stage;Caudovirales;unclassified;unclassified;unclassified	Bacteria;Proteobacteria;Alphaproteobacteria;unknown;unknown;unknown	alpha proteobacterium SCGC AAA160-J14	extrachromosomal	linear	unclustered
Alphaproteobacteria_gi_487379952	hallmark	82;21;2;59	Viruses;dsDNA viruses no RNA stage;Caudovirales;unclassified;unclassified;unknown	Bacteria;Proteobacteria;Alphaproteobacteria;Rhizobiales;Methylobacteriaceae;Methylobacterium	Methylobacterium sp. 285MFTsu5.1	extrachromosomal	linear	Cluster_587
Alphaproteobacteria_gi_487380020	hallmark	72;6;3;63	Viruses;dsDNA viruses no RNA stage;Caudovirales;unclassified;unknown;unknown	Bacteria;Proteobacteria;Alphaproteobacteria;Rhizobiales;Methylobacteriaceae;Methylobacterium	Methylobacterium sp. 285MFTsu5.1	extrachromosomal	linear	unclustered
Alphaproteobacteria_gi_487404945-2532390-2577293	hallmark;refseq	59;26;6;27	Viruses;dsDNA viruses no RNA stage;Caudovirales;Myoviridae;Mulikevirus;unknown	Bacteria;Proteobacteria;Alphaproteobacteria;Rhizobiales;Methylocystaceae;Methylopila	Methylopila sp. M107	prophage	linear	Cluster_101
Alphaproteobacteria_gi_491810426	hallmark	23;8;2;13	Viruses;dsDNA viruses no RNA stage;Caudovirales;Siphoviridae;unclassified;unknown	Bacteria;Proteobacteria;Alphaproteobacteria;Rhodobacterales;Rhodobacteraceae;Ruegeria	Ruegeria mobilis F1926	extrachromosomal	linear	Cluster_2
Alphaproteobacteria_gi_491815706	hallmark;refseq	28;12;4;12	Viruses;dsDNA viruses no RNA stage;Caudovirales;unclassified;unclassified;unknown	Bacteria;Proteobacteria;Alphaproteobacteria;Rhodobacterales;Rhodobacteraceae;Ruegeria	Ruegeria mobilis F1926	extrachromosomal	linear	Cluster_101
Alphaproteobacteria_gi_494011385	hallmark;noncaudo	4;2;;2	Viruses;ssDNA viruses;unknown;Microviridae;Chlamydiamicrovirus;unknown	Bacteria;Proteobacteria;Alphaproteobacteria;Sphingomonadales;Sphingomonadaceae;Sphingobium	Sphingobium japonicum BiD32	extrachromosomal	linear	Cluster_140
Alphaproteobacteria_gi_511098063	hallmark;refseq	53;27;9;17	Viruses;dsDNA viruses no RNA stage;Caudovirales;Myoviridae;unclassified;unknown	Bacteria;Proteobacteria;Alphaproteobacteria;Rhizobiales;Bartonellaceae;Bartonella	Bartonella vinsonii subsp. berkhoffii str. Tweed	extrachromosomal	linear	Cluster_101
Alphaproteobacteria_gi_511098065	hallmark;refseq	51;27;9;15	Viruses;dsDNA viruses no RNA stage;Caudovirales;unclassified;unclassified;unknown	Bacteria;Proteobacteria;Alphaproteobacteria;Rhizobiales;Bartonellaceae;Bartonella	Bartonella vinsonii subsp. berkhoffii str. Tweed	extrachromosomal	linear	Cluster_101
Alphaproteobacteria_gi_511098066-102560-145358	hallmark;refseq;vdb	52;27;10;15	Viruses;dsDNA viruses no RNA stage;Caudovirales;unclassified;unclassified;unknown	Bacteria;Proteobacteria;Alphaproteobacteria;Rhizobiales;Bartonellaceae;Bartonella	Bartonella vinsonii subsp. berkhoffii str. Tweed	prophage	linear	Cluster_101
Alphaproteobacteria_gi_511098067	hallmark;refseq	56;28;9;19	Viruses;dsDNA viruses no RNA stage;Caudovirales;unclassified;unclassified;unknown	Bacteria;Proteobacteria;Alphaproteobacteria;Rhizobiales;Bartonellaceae;Bartonella	Bartonella vinsonii subsp. berkhoffii str. Tweed	extrachromosomal	linear	Cluster_101
Alphaproteobacteria_gi_511098068-31297-62538	hallmark;refseq	41;14;9;18	Viruses;dsDNA viruses no RNA stage;Caudovirales;Myoviridae;;unknown	Bacteria;Proteobacteria;Alphaproteobacteria;Rhizobiales;Bartonellaceae;Bartonella	Bartonella vinsonii subsp. berkhoffii str. Tweed	prophage	linear	Cluster_203
Alphaproteobacteria_gi_511098068-381-17654	hallmark;refseq	25;14;2;9	Viruses;dsDNA viruses no RNA stage;Caudovirales;unclassified;unclassified;unknown	Bacteria;Proteobacteria;Alphaproteobacteria;Rhizobiales;Bartonellaceae;Bartonella	Bartonella vinsonii subsp. berkhoffii str. Tweed	prophage	linear	Cluster_101
Alphaproteobacteria_gi_511098069	hallmark;refseq	52;27;9;16	Viruses;dsDNA viruses no RNA stage;Caudovirales;unclassified;unclassified;unknown	Bacteria;Proteobacteria;Alphaproteobacteria;Rhizobiales;Bartonellaceae;Bartonella	Bartonella vinsonii subsp. berkhoffii str. Tweed	extrachromosomal	linear	Cluster_101
Alphaproteobacteria_gi_511767980	hallmark	22;4;1;17	Viruses;dsDNA viruses no RNA stage;Caudovirales;Siphoviridae;unknown;unknown	Bacteria;Proteobacteria;Alphaproteobacteria;Rhizobiales;Brucellaceae;Pseudochrobactrum	Pseudochrobactrum sp. AO18b	extrachromosomal	linear	Cluster_201
Alphaproteobacteria_gi_513139191	hallmark;refseq	28;14;4;10	Viruses;dsDNA viruses no RNA stage;Caudovirales;Siphoviridae;Lambdalikevirus;unknown	Bacteria;Proteobacteria;Alphaproteobacteria;Rhodobacterales;Hyphomonadaceae;Maricaulis	Maricaulis sp. JL2009	extrachromosomal	linear	Cluster_42
Alphaproteobacteria_gi_514075839	hallmark	62;18;4;40	Viruses;dsDNA viruses no RNA stage;Caudovirales;unclassified;unclassified;unclassified	Bacteria;Proteobacteria;Alphaproteobacteria;Sphingomonadales;Sphingomonadaceae;Sphingobium	Sphingobium sp. YL23	extrachromosomal	linear	Cluster_183
Alphaproteobacteria_gi_523692486	hallmark;refseq	60;21;11;28	Viruses;dsDNA viruses no RNA stage;Caudovirales;unclassified;;unclassified	Bacteria;Proteobacteria;Alphaproteobacteria;Rhizobiales;Rhizobiaceae;Agrobacterium	Agrobacterium radiobacter DSM 30147	extrachromosomal	linear	Cluster_0
Alphaproteobacteria_gi_523699749-22568-54642	hallmark	39;5;5;29	Viruses;dsDNA viruses no RNA stage;Caudovirales;Myoviridae;;unknown	Bacteria;Proteobacteria;Alphaproteobacteria;Sphingomonadales;Sphingomonadaceae;Sphingobium	Sphingobium chinhatense IP26	prophage	linear	Cluster_326
Alphaproteobacteria_gi_523700511	refseq;vdb	9;1;4;4	Viruses;dsDNA viruses no RNA stage;Caudovirales;Siphoviridae;unknown;unknown	Bacteria;Proteobacteria;Alphaproteobacteria;Sphingomonadales;Sphingomonadaceae;Sphingobium	Sphingobium chinhatense IP26	extrachromosomal	linear	Cluster_42
Alphaproteobacteria_gi_523701341	hallmark;refseq	16;7;1;8	Viruses;dsDNA viruses no RNA stage;Caudovirales;Siphoviridae;Yualikevirus;unknown	Bacteria;Proteobacteria;Alphaproteobacteria;Sphingomonadales;Sphingomonadaceae;Sphingobium	Sphingobium chinhatense IP26	extrachromosomal	linear	Cluster_326
Alphaproteobacteria_gi_523701355	hallmark;refseq	16;7;1;8	Viruses;dsDNA viruses no RNA stage;Caudovirales;Siphoviridae;Yualikevirus;unknown	Bacteria;Proteobacteria;Alphaproteobacteria;Sphingomonadales;Sphingomonadaceae;Sphingobium	Sphingobium chinhatense IP26	extrachromosomal	linear	Cluster_326
Alphaproteobacteria_gi_523702149	hallmark	18;3;5;10	Viruses;dsDNA viruses no RNA stage;Caudovirales;Siphoviridae;Lambdalikevirus;unknown	Bacteria;Proteobacteria;Alphaproteobacteria;Sphingomonadales;Sphingomonadaceae;Sphingobium	Sphingobium chinhatense IP26	extrachromosomal	linear	unclustered
Alphaproteobacteria_gi_523703156	hallmark	13;5;;8	Viruses;dsDNA viruses no RNA stage;Caudovirales;Myoviridae;;unknown	Bacteria;Proteobacteria;Alphaproteobacteria;Sphingomonadales;Sphingomonadaceae;Sphingobium	Sphingobium chinhatense IP26	extrachromosomal	linear	Cluster_326
Alphaproteobacteria_gi_544701511	hallmark	42;10;10;22	Viruses;dsDNA viruses no RNA stage;Caudovirales;unclassified;unclassified;unknown	Bacteria;Proteobacteria;Alphaproteobacteria;Rhodospirillales;Rhodospirillaceae;Phaeospirillum	Phaeospirillum fulvum MGU-K5	extrachromosomal	linear	Cluster_3
Alphaproteobacteria_gi_544702032	hallmark;refseq	32;14;9;9	Viruses;dsDNA viruses no RNA stage;Caudovirales;unclassified;unclassified;unknown	Bacteria;Proteobacteria;Alphaproteobacteria;Rhodospirillales;Rhodospirillaceae;Phaeospirillum	Phaeospirillum fulvum MGU-K5	extrachromosomal	linear	Cluster_3
Alphaproteobacteria_gi_544702296	hallmark	21;7;;14	Viruses;dsDNA viruses no RNA stage;Caudovirales;Siphoviridae;unclassified;unclassified	Bacteria;Proteobacteria;Alphaproteobacteria;Rhodospirillales;Rhodospirillaceae;Phaeospirillum	Phaeospirillum fulvum MGU-K5	extrachromosomal	linear	unclustered
Alphaproteobacteria_gi_544818519	hallmark	22;4;2;16	Viruses;dsDNA viruses no RNA stage;Caudovirales;Podoviridae;T7likevirus;unknown	Bacteria;Proteobacteria;Alphaproteobacteria;Sphingomonadales;Sphingomonadaceae;Novosphingobium	Novosphingobium lindaniclasticum LE124	extrachromosomal	linear	Cluster_9
Alphaproteobacteria_gi_544818927-6137-37414	hallmark;vdb	40;16;3;21	Viruses;dsDNA viruses no RNA stage;Caudovirales;Podoviridae;T7likevirus;unknown	Bacteria;Proteobacteria;Alphaproteobacteria;Sphingomonadales;Sphingomonadaceae;Novosphingobium	Novosphingobium lindaniclasticum LE124	prophage	linear	Cluster_58
Alphaproteobacteria_gi_544908096	hallmark	19;6;6;7	Viruses;dsDNA viruses no RNA stage;Caudovirales;Myoviridae;Mulikevirus;unknown	Bacteria;Proteobacteria;Alphaproteobacteria;Sphingomonadales;Sphingomonadaceae;Sphingobium	Sphingobium ummariense RL-3	extrachromosomal	linear	Cluster_3
Alphaproteobacteria_gi_544909599	hallmark	40;8;5;27	Viruses;dsDNA viruses no RNA stage;Caudovirales;Siphoviridae;unclassified;unknown	Bacteria;Proteobacteria;Alphaproteobacteria;Sphingomonadales;Sphingomonadaceae;Sphingobium	Sphingobium ummariense RL-3	extrachromosomal	linear	Cluster_326
Alphaproteobacteria_gi_547459329	hallmark	15;3;;12	Viruses;dsDNA viruses no RNA stage;Caudovirales;Podoviridae;unknown;unknown	Bacteria;Proteobacteria;Alphaproteobacteria;Rhodospirillales;Acetobacteraceae;Acetobacter	Acetobacter sp. CAG:267	extrachromosomal	linear	Cluster_313
Alphaproteobacteria_gi_547776269-554-11103	hallmark;refseq;vdb	14;11;;3	Viruses;dsDNA viruses no RNA stage;Caudovirales;Podoviridae;unknown;unknown	Bacteria;Proteobacteria;Alphaproteobacteria;Rhodospirillales;Rhodospirillaceae;Azospirillum	Azospirillum sp. CAG:260	prophage	linear	Cluster_7
Alphaproteobacteria_gi_547784706	hallmark;refseq;vdb	17;8;3;6	Viruses;dsDNA viruses no RNA stage;Caudovirales;Siphoviridae;Lambdalikevirus;unknown	Bacteria;Proteobacteria;Alphaproteobacteria;Rhodospirillales;Rhodospirillaceae;Azospirillum	Azospirillum sp. CAG:239	extrachromosomal	linear	Cluster_0
Alphaproteobacteria_gi_547785573-39959-52534	hallmark	19;5;1;13	Viruses;dsDNA viruses no RNA stage;Caudovirales;Podoviridae;unknown;unknown	Bacteria;Proteobacteria;Alphaproteobacteria;Rhodospirillales;Rhodospirillaceae;Azospirillum	Azospirillum sp. CAG:239	prophage	linear	Cluster_114
Alphaproteobacteria_gi_549951343	hallmark	46;14;5;27	Viruses;dsDNA viruses no RNA stage;Caudovirales;Siphoviridae;unknown;unknown	Bacteria;Proteobacteria;Alphaproteobacteria;Rhizobiales;Brucellaceae;Ochrobactrum	Ochrobactrum intermedium 229E	extrachromosomal	linear	Cluster_26
Alphaproteobacteria_gi_550978692	hallmark	28;4;11;13	Viruses;dsDNA viruses no RNA stage;Caudovirales;Siphoviridae;Yualikevirus;unknown	Bacteria;Proteobacteria;Alphaproteobacteria;Rhodospirillales;Rhodospirillaceae;Fodinicurvata	Fodinicurvata sediminis DSM 21159	extrachromosomal	linear	unclustered
Alphaproteobacteria_gi_557832083	hallmark;refseq	15;12;1;2	Viruses;dsDNA viruses no RNA stage;Caudovirales;Siphoviridae;Lambdalikevirus;unknown	Bacteria;Proteobacteria;Alphaproteobacteria;Caulobacterales;Caulobacteraceae;Asticcacaulis	Asticcacaulis sp. AC466	extrachromosomal	linear	Cluster_149
Alphaproteobacteria_gi_557832156	refseq	76;25;;51	Viruses;dsDNA viruses no RNA stage;Caudovirales;Siphoviridae;unclassified;unknown	Bacteria;Proteobacteria;Alphaproteobacteria;Caulobacterales;Caulobacteraceae;Asticcacaulis	Asticcacaulis sp. AC466	extrachromosomal	linear	Cluster_149
Alphaproteobacteria_gi_558562543-24663-106868	hallmark	78;23;30;25	Viruses;dsDNA viruses no RNA stage;Caudovirales;Siphoviridae;Lambdalikevirus;unknown	Bacteria;Proteobacteria;Alphaproteobacteria;Rickettsiales;Anaplasmataceae;Wolbachia	Wolbachia pipientis wMelPop	prophage	linear	Cluster_181
Alphaproteobacteria_gi_560138247	hallmark;refseq	48;22;7;19	Viruses;dsDNA viruses no RNA stage;Caudovirales;Myoviridae;Hpunalikevirus;unknown	Bacteria;Proteobacteria;Alphaproteobacteria;Sphingomonadales;Sphingomonadaceae;Zymomonas	Zymomonas mobilis subsp. mobilis str. CP4 = NRRL B-14023	extrachromosomal	linear	Cluster_0
Alphaproteobacteria_gi_563528539	hallmark	23;5;;18	Viruses;dsDNA viruses no RNA stage;Caudovirales;Podoviridae;unknown;unknown	Bacteria;Proteobacteria;Alphaproteobacteria;Rhizobiales;Phyllobacteriaceae;Mesorhizobium	Mesorhizobium sp. LNJC403B00	extrachromosomal	linear	Cluster_313
Alphaproteobacteria_gi_563537402	hallmark	21;4;;17	Viruses;dsDNA viruses no RNA stage;Caudovirales;Podoviridae;unknown;unknown	Bacteria;Proteobacteria;Alphaproteobacteria;Rhizobiales;Phyllobacteriaceae;Mesorhizobium	Mesorhizobium sp. LNJC395A00	extrachromosomal	linear	Cluster_313
Alphaproteobacteria_gi_563543012	hallmark	9;2;;7	Viruses;dsDNA viruses no RNA stage;Caudovirales;Podoviridae;unknown;unknown	Bacteria;Proteobacteria;Alphaproteobacteria;Rhizobiales;Phyllobacteriaceae;Mesorhizobium	Mesorhizobium sp. LNJC391B00	extrachromosomal	linear	unclustered
Alphaproteobacteria_gi_563543678	hallmark	24;3;6;15	Viruses;dsDNA viruses no RNA stage;Caudovirales;Siphoviridae;;unknown	Bacteria;Proteobacteria;Alphaproteobacteria;Rhizobiales;Phyllobacteriaceae;Mesorhizobium	Mesorhizobium sp. LNJC386A00	extrachromosomal	linear	unclustered
Alphaproteobacteria_gi_563543685	hallmark	15;4;;11	Viruses;dsDNA viruses no RNA stage;Caudovirales;Podoviridae;unknown;unknown	Bacteria;Proteobacteria;Alphaproteobacteria;Rhizobiales;Phyllobacteriaceae;Mesorhizobium	Mesorhizobium sp. LNJC386A00	extrachromosomal	linear	Cluster_313
Alphaproteobacteria_gi_563545195	hallmark	18;5;;13	Viruses;dsDNA viruses no RNA stage;Caudovirales;unclassified;unclassified;unclassified	Bacteria;Proteobacteria;Alphaproteobacteria;Rhizobiales;Phyllobacteriaceae;Mesorhizobium	Mesorhizobium sp. LNJC384A00	extrachromosomal	linear	Cluster_313
Alphaproteobacteria_gi_563575800	refseq	24;9;2;13	Viruses;dsDNA viruses no RNA stage;Caudovirales;Siphoviridae;Phic3unalikevirus;unknown	Bacteria;Proteobacteria;Alphaproteobacteria;Rhizobiales;Phyllobacteriaceae;Mesorhizobium	Mesorhizobium sp. LNHC221B00	extrachromosomal	linear	Cluster_301
Alphaproteobacteria_gi_564007046	hallmark	13;2;2;9	Viruses;dsDNA viruses no RNA stage;Caudovirales;Siphoviridae;unknown;unknown	Bacteria;Proteobacteria;Alphaproteobacteria;Rhizobiales;Phyllobacteriaceae;Mesorhizobium	Mesorhizobium sp. L103C119B0	extrachromosomal	linear	Cluster_510
Alphaproteobacteria_gi_564013440-0-38639	hallmark;refseq	47;26;2;19	Viruses;dsDNA viruses no RNA stage;Caudovirales;Myoviridae;unclassified;unknown	Bacteria;Proteobacteria;Alphaproteobacteria;Sphingomonadales;Sphingomonadaceae;Blastomonas	Blastomonas sp. CACIA14H2	prophage	linear	Cluster_0
Alphaproteobacteria_gi_565826716	hallmark	44;10;10;24	Viruses;dsDNA viruses no RNA stage;Caudovirales;Siphoviridae;unclassified;unknown	Bacteria;Proteobacteria;Alphaproteobacteria;Rhodobacterales;Rhodobacteraceae;Rhodobacter	Rhodobacter capsulatus DE442	extrachromosomal	linear	Cluster_136
Alphaproteobacteria_gi_565828300-11201-39437	hallmark;vdb	37;12;10;15	Viruses;dsDNA viruses no RNA stage;Caudovirales;Siphoviridae;Lambdalikevirus;unknown	Bacteria;Proteobacteria;Alphaproteobacteria;Rhodobacterales;Rhodobacteraceae;Rhodobacter	Rhodobacter capsulatus YW1	prophage	linear	Cluster_126
Alphaproteobacteria_gi_565828556	hallmark	19;5;3;11	Viruses;dsDNA viruses no RNA stage;Caudovirales;Siphoviridae;Lambdalikevirus;unknown	Bacteria;Proteobacteria;Alphaproteobacteria;Rhodobacterales;Rhodobacteraceae;Rhodobacter	Rhodobacter capsulatus YW1	extrachromosomal	linear	Cluster_136
Alphaproteobacteria_gi_565828729	hallmark;refseq	121;71;15;35	Viruses;dsDNA viruses no RNA stage;Caudovirales;Siphoviridae;unknown;unknown	Bacteria;Proteobacteria;Alphaproteobacteria;Rhodobacterales;Rhodobacteraceae;Rhodobacter	Rhodobacter capsulatus YW1	extrachromosomal	linear	Cluster_3
Alphaproteobacteria_gi_565833173-67658-102706	hallmark	40;10;7;23	Viruses;dsDNA viruses no RNA stage;Caudovirales;Siphoviridae;unclassified;unknown	Bacteria;Proteobacteria;Alphaproteobacteria;Rhodobacterales;Rhodobacteraceae;Rhodobacter	Rhodobacter capsulatus YW2	prophage	linear	Cluster_136
Alphaproteobacteria_gi_565842009	hallmark	44;10;10;24	Viruses;dsDNA viruses no RNA stage;Caudovirales;Siphoviridae;unclassified;unknown	Bacteria;Proteobacteria;Alphaproteobacteria;Rhodobacterales;Rhodobacteraceae;Rhodobacter	Rhodobacter capsulatus Y262	extrachromosomal	linear	Cluster_136
Alphaproteobacteria_gi_565843078	hallmark	44;10;10;24	Viruses;dsDNA viruses no RNA stage;Caudovirales;Siphoviridae;unclassified;unknown	Bacteria;Proteobacteria;Alphaproteobacteria;Rhodobacterales;Rhodobacteraceae;Rhodobacter	Rhodobacter capsulatus R121	extrachromosomal	linear	Cluster_136
Alphaproteobacteria_gi_567406774	hallmark	46;14;3;29	Viruses;dsDNA viruses no RNA stage;Caudovirales;Siphoviridae;unknown;unknown	Bacteria;Proteobacteria;Alphaproteobacteria;Sphingomonadales;Sphingomonadaceae;Sphingobium	Sphingobium sp. C100	extrachromosomal	linear	Cluster_342
Alphaproteobacteria_gi_568305927	hallmark	55;15;6;34	Viruses;dsDNA viruses no RNA stage;Caudovirales;Siphoviridae;Lambdalikevirus;unknown	Bacteria;Proteobacteria;Alphaproteobacteria;Rhodobacterales;Rhodobacteraceae;Phaeobacter	Phaeobacter gallaeciensis DSM 26640	extrachromosomal	linear	Cluster_436
Alphaproteobacteria_gi_584596132	hallmark;vdb	12;2;4;6	Viruses;dsDNA viruses no RNA stage;Caudovirales;unclassified;unclassified;unknown	Bacteria;Proteobacteria;Alphaproteobacteria;Rickettsiales;Holosporaceae;Holospora	Holospora undulata HU1	extrachromosomal	linear	Cluster_42
Alphaproteobacteria_gi_584596366-8919-59450	hallmark;refseq	65;16;23;26	Viruses;dsDNA viruses no RNA stage;Caudovirales;unclassified;unclassified;unknown	Bacteria;Proteobacteria;Alphaproteobacteria;Rickettsiales;Holosporaceae;Holospora	Holospora undulata HU1	prophage	linear	Cluster_181
Alphaproteobacteria_gi_83309099-2600211-2620488	noncaudo	42;6;;36	Viruses;unclassified;unclassified;unclassified;unclassified;unknown	Bacteria;Proteobacteria;Alphaproteobacteria;Rhodospirillales;Rhodospirillaceae;Magnetospirillum	Magnetospirillum magneticum AMB-1	prophage	linear	unclustered
Bacilli_gi_116510843-1036732-1072360	hallmark;refseq	59;49;4;6	Viruses;dsDNA viruses no RNA stage;Caudovirales;Siphoviridae;Lambdalikevirus;unknown	Bacteria;Firmicutes;Bacilli;Lactobacillales;Streptococcaceae;Lactococcus	Lactococcus lactis subsp. cremoris SK11	prophage	linear	Cluster_159
Bacilli_gi_116628683-612264-680268	hallmark;refseq	100;94;;6	Viruses;dsDNA viruses no RNA stage;Caudovirales;unclassified;unclassified;unclassified	Bacteria;Firmicutes;Bacilli;Lactobacillales;Lactobacillaceae;Lactobacillus	Lactobacillus gasseri ATCC 33323	prophage	linear	Cluster_141
Bacilli_gi_118445179	hallmark;refseq	80;33;21;26	Viruses;dsDNA viruses no RNA stage;Caudovirales;Siphoviridae;unknown;unknown	Bacteria;Firmicutes;Bacilli;Bacillales;Bacillaceae;Bacillus	Bacillus thuringiensis str. Al Hakam	extrachromosomal	linear	Cluster_268
Bacilli_gi_125622882-779007-819130	hallmark;refseq	61;49;4;8	Viruses;dsDNA viruses no RNA stage;Caudovirales;Siphoviridae;unknown;unknown	Bacteria;Firmicutes;Bacilli;Lactobacillales;Streptococcaceae;Lactococcus	Lactococcus lactis subsp. cremoris MG1363	prophage	linear	Cluster_195
Bacilli_gi_126652723-0-48258	hallmark	66;19;14;33	Viruses;dsDNA viruses no RNA stage;Caudovirales;Siphoviridae;unknown;unknown	Bacteria;Firmicutes;Bacilli;Bacillales;Bacillaceae;Bacillus	Bacillus sp. B14905	prophage	linear	Cluster_19
Bacilli_gi_139472888-1271278-1308146	hallmark;refseq	58;50;1;7	Viruses;dsDNA viruses no RNA stage;Caudovirales;Siphoviridae;unknown;unknown	Bacteria;Firmicutes;Bacilli;Lactobacillales;Streptococcaceae;Streptococcus	Streptococcus pyogenes str. Manfredo	prophage	linear	Cluster_68
Bacilli_gi_139472888-654135-687352	hallmark;refseq	55;50;1;4	Viruses;unclassified;unclassified;unclassified;unknown;unknown	Bacteria;Firmicutes;Bacilli;Lactobacillales;Streptococcaceae;Streptococcus	Streptococcus pyogenes str. Manfredo	prophage	linear	Cluster_57
Bacilli_gi_148266447-1076286-1121209	hallmark;refseq	63;59;3;1	Viruses;dsDNA viruses no RNA stage;Caudovirales;Siphoviridae;unclassified;unknown	Bacteria;Firmicutes;Bacilli;Bacillales;Staphylococcaceae;Staphylococcus	Staphylococcus aureus subsp. aureus JH9	prophage	linear	Cluster_6
Bacilli_gi_148266447-361134-403447	hallmark;refseq	65;61;4;	Viruses;dsDNA viruses no RNA stage;Caudovirales;Siphoviridae;unclassified;unknown	Bacteria;Firmicutes;Bacilli;Bacillales;Staphylococcaceae;Staphylococcus	Staphylococcus aureus subsp. aureus JH9	prophage	linear	Cluster_8
Bacilli_gi_148986114	hallmark;refseq	42;34;;8	Viruses;dsDNA viruses no RNA stage;Caudovirales;Siphoviridae;unclassified;unknown	Bacteria;Firmicutes;Bacilli;Lactobacillales;Streptococcaceae;Streptococcus	Streptococcus pneumoniae SP3-BS71	extrachromosomal	linear	Cluster_31
Bacilli_gi_148990169-4745-39384	hallmark;refseq	55;37;5;13	Viruses;dsDNA viruses no RNA stage;Caudovirales;Siphoviridae;unknown;unknown	Bacteria;Firmicutes;Bacilli;Lactobacillales;Streptococcaceae;Streptococcus	Streptococcus pneumoniae SP6-BS73	prophage	linear	Cluster_50
Bacilli_gi_148998951	hallmark;refseq	48;35;3;10	Viruses;dsDNA viruses no RNA stage;Caudovirales;Siphoviridae;unknown;unknown	Bacteria;Firmicutes;Bacilli;Lactobacillales;Streptococcaceae;Streptococcus	Streptococcus pneumoniae SP11-BS70	extrachromosomal	linear	Cluster_30
Bacilli_gi_149004075	hallmark;refseq	46;28;3;15	Viruses;dsDNA viruses no RNA stage;Caudovirales;Siphoviridae;unknown;unknown	Bacteria;Firmicutes;Bacilli;Lactobacillales;Streptococcaceae;Streptococcus	Streptococcus pneumoniae SP14-BS69	extrachromosomal	linear	Cluster_30
Bacilli_gi_149004357	hallmark;refseq	21;13;1;7	Viruses;dsDNA viruses no RNA stage;Caudovirales;Siphoviridae;unknown;unknown	Bacteria;Firmicutes;Bacilli;Lactobacillales;Streptococcaceae;Streptococcus	Streptococcus pneumoniae SP14-BS69	extrachromosomal	linear	Cluster_50
Bacilli_gi_149004388	hallmark;refseq	37;27;3;7	Viruses;dsDNA viruses no RNA stage;Caudovirales;Siphoviridae;unknown;unknown	Bacteria;Firmicutes;Bacilli;Lactobacillales;Streptococcaceae;Streptococcus	Streptococcus pneumoniae SP14-BS69	extrachromosomal	linear	Cluster_50
Bacilli_gi_149008029	hallmark;refseq	53;52;1;	Viruses;dsDNA viruses no RNA stage;Caudovirales;Siphoviridae;unclassified;unknown	Bacteria;Firmicutes;Bacilli;Lactobacillales;Streptococcaceae;Streptococcus	Streptococcus pneumoniae SP18-BS74	extrachromosomal	linear	Cluster_52
Bacilli_gi_149012670-25250-58304	hallmark;refseq	52;36;4;12	Viruses;dsDNA viruses no RNA stage;Caudovirales;Siphoviridae;unknown;unknown	Bacteria;Firmicutes;Bacilli;Lactobacillales;Streptococcaceae;Streptococcus	Streptococcus pneumoniae SP19-BS75	prophage	linear	Cluster_50
Bacilli_gi_150392480-1076160-1121083	hallmark;refseq	63;59;3;1	Viruses;dsDNA viruses no RNA stage;Caudovirales;Siphoviridae;unclassified;unknown	Bacteria;Firmicutes;Bacilli;Bacillales;Staphylococcaceae;Staphylococcus	Staphylococcus aureus subsp. aureus JH1	prophage	linear	Cluster_6
Bacilli_gi_150392480-361204-403517	hallmark;refseq	65;61;4;	Viruses;dsDNA viruses no RNA stage;Caudovirales;Siphoviridae;unclassified;unknown	Bacteria;Firmicutes;Bacilli;Bacillales;Staphylococcaceae;Staphylococcus	Staphylococcus aureus subsp. aureus JH1	prophage	linear	Cluster_8
Bacilli_gi_151220212-1098873-1141372	hallmark;refseq	66;63;3;	Viruses;dsDNA viruses no RNA stage;Caudovirales;Siphoviridae;unclassified;unknown	Bacteria;Firmicutes;Bacilli;Bacillales;Staphylococcaceae;Staphylococcus	Staphylococcus aureus subsp. aureus str. Newman	prophage	linear	Cluster_8
Bacilli_gi_151220212-320821-363215	hallmark;refseq	68;68;;	Viruses;dsDNA viruses no RNA stage;Caudovirales;Siphoviridae;unclassified;unknown	Bacteria;Firmicutes;Bacilli;Bacillales;Staphylococcaceae;Staphylococcus	Staphylococcus aureus subsp. aureus str. Newman	prophage	linear	Cluster_8
Bacilli_gi_15671982-1414087-1456974	hallmark;refseq	60;57;3;	Viruses;dsDNA viruses no RNA stage;Caudovirales;Siphoviridae;unknown;unknown	Bacteria;Firmicutes;Bacilli;Lactobacillales;Streptococcaceae;Lactococcus	Lactococcus lactis subsp. lactis Il1403	prophage	linear	Cluster_32
Bacilli_gi_15671982-450396-517339	hallmark;refseq	99;76;20;3	Viruses;dsDNA viruses no RNA stage;Caudovirales;Siphoviridae;unclassified;unknown	Bacteria;Firmicutes;Bacilli;Lactobacillales;Streptococcaceae;Lactococcus	Lactococcus lactis subsp. lactis Il1403	prophage	linear	Cluster_199
Bacilli_gi_15674250-529606-568538	hallmark;refseq	47;41;1;5	Viruses;unclassified;unclassified;unclassified;unknown;unknown	Bacteria;Firmicutes;Bacilli;Lactobacillales;Streptococcaceae;Streptococcus	Streptococcus pyogenes M1 GAS	prophage	linear	Cluster_90
Bacilli_gi_15674250-775777-819888	hallmark;refseq	66;45;9;12	Viruses;unclassified;unclassified;unclassified;unknown;unknown	Bacteria;Firmicutes;Bacilli;Lactobacillales;Streptococcaceae;Streptococcus	Streptococcus pyogenes M1 GAS	prophage	linear	Cluster_115
Bacilli_gi_161508266-1559658-1607107	hallmark;refseq	66;63;2;1	Viruses;dsDNA viruses no RNA stage;Caudovirales;Siphoviridae;unclassified;unknown	Bacteria;Firmicutes;Bacilli;Bacillales;Staphylococcaceae;Staphylococcus	Staphylococcus aureus subsp. aureus USA300_TCH1516	prophage	linear	Cluster_6
Bacilli_gi_163791513	hallmark;refseq	23;16;3;4	Viruses;unclassified;unclassified;unclassified;unclassified;unknown	Bacteria;Firmicutes;Bacilli;Lactobacillales;Carnobacteriaceae;Carnobacterium	Carnobacterium sp. AT7	extrachromosomal	linear	Cluster_145
Bacilli_gi_163805793	hallmark;refseq	55;42;1;12	Viruses;dsDNA viruses no RNA stage;Caudovirales;Siphoviridae;unknown;unknown	Bacteria;Firmicutes;Bacilli;Lactobacillales;Streptococcaceae;Streptococcus	Streptococcus pneumoniae CDC3059-06	extrachromosomal	linear	Cluster_31
Bacilli_gi_163805794	hallmark;refseq	57;44;1;12	Viruses;dsDNA viruses no RNA stage;Caudovirales;Siphoviridae;unknown;unknown	Bacteria;Firmicutes;Bacilli;Lactobacillales;Streptococcaceae;Streptococcus	Streptococcus pneumoniae CDC3059-06	extrachromosomal	linear	Cluster_31
Bacilli_gi_163805795	hallmark;refseq	51;35;4;12	Viruses;dsDNA viruses no RNA stage;Caudovirales;Siphoviridae;unknown;unknown	Bacteria;Firmicutes;Bacilli;Lactobacillales;Streptococcaceae;Streptococcus	Streptococcus pneumoniae CDC3059-06	extrachromosomal	linear	Cluster_31
Bacilli_gi_163805796	hallmark;refseq	47;35;1;11	Viruses;dsDNA viruses no RNA stage;Caudovirales;Siphoviridae;unknown;unknown	Bacteria;Firmicutes;Bacilli;Lactobacillales;Streptococcaceae;Streptococcus	Streptococcus pneumoniae CDC3059-06	extrachromosomal	linear	Cluster_31
Bacilli_gi_163805865	hallmark;refseq	56;42;3;11	Viruses;dsDNA viruses no RNA stage;Caudovirales;Siphoviridae;unknown;unknown	Bacteria;Firmicutes;Bacilli;Lactobacillales;Streptococcaceae;Streptococcus	Streptococcus pneumoniae SP195	extrachromosomal	linear	Cluster_31
Bacilli_gi_163806165-83466-125628	hallmark;refseq	61;40;11;10	Viruses;dsDNA viruses no RNA stage;Caudovirales;Siphoviridae;unknown;unknown	Bacteria;Firmicutes;Bacilli;Lactobacillales;Streptococcaceae;Streptococcus	Streptococcus pneumoniae CDC1873-00	prophage	linear	Cluster_30
Bacilli_gi_163806179	hallmark;refseq	44;30;5;9	Viruses;dsDNA viruses no RNA stage;Caudovirales;Siphoviridae;unknown;unknown	Bacteria;Firmicutes;Bacilli;Lactobacillales;Streptococcaceae;Streptococcus	Streptococcus pneumoniae CDC1873-00	extrachromosomal	linear	Cluster_30
Bacilli_gi_163806182	hallmark;refseq	43;28;5;10	Viruses;dsDNA viruses no RNA stage;Caudovirales;Siphoviridae;unknown;unknown	Bacteria;Firmicutes;Bacilli;Lactobacillales;Streptococcaceae;Streptococcus	Streptococcus pneumoniae CDC1873-00	extrachromosomal	linear	Cluster_30
Bacilli_gi_163937865	hallmark;refseq	85;29;8;48	Viruses;dsDNA viruses no RNA stage;Caudovirales;Siphoviridae;unclassified;unknown	Bacteria;Firmicutes;Bacilli;Bacillales;Bacillaceae;Bacillus	Bacillus weihenstephanensis KBAB4	extrachromosomal	linear	Cluster_365
Bacilli_gi_163937941	hallmark;refseq	71;37;11;23	Viruses;dsDNA viruses no RNA stage;Caudovirales;Siphoviridae;unknown;unknown	Bacteria;Firmicutes;Bacilli;Bacillales;Bacillaceae;Bacillus	Bacillus weihenstephanensis KBAB4	extrachromosomal	linear	Cluster_76
Bacilli_gi_165873068	hallmark;refseq	28;21;3;4	Viruses;dsDNA viruses no RNA stage;Caudovirales;Siphoviridae;unknown;unknown	Bacteria;Firmicutes;Bacilli;Bacillales;Bacillaceae;Bacillus	Bacillus anthracis str. A0488	extrachromosomal	linear	Cluster_76
Bacilli_gi_167636592	hallmark;refseq	27;20;3;4	Viruses;dsDNA viruses no RNA stage;Caudovirales;Siphoviridae;unclassified;unknown	Bacteria;Firmicutes;Bacilli;Bacillales;Bacillaceae;Bacillus	Bacillus anthracis str. A0442	extrachromosomal	linear	Cluster_76
Bacilli_gi_167641861	hallmark;refseq	31;21;5;5	Viruses;dsDNA viruses no RNA stage;Caudovirales;Siphoviridae;unclassified;unknown	Bacteria;Firmicutes;Bacilli;Bacillales;Bacillaceae;Bacillus	Bacillus anthracis str. A0193	extrachromosomal	linear	Cluster_76
Bacilli_gi_16799079-2406683-2445916	hallmark;refseq	64;46;9;9	Viruses;dsDNA viruses no RNA stage;Caudovirales;Siphoviridae;unknown;unknown	Bacteria;Firmicutes;Bacilli;Bacillales;Listeriaceae;Listeria	Listeria innocua Clip11262	prophage	linear	Cluster_94
Bacilli_gi_16799079-2587855-2625832	hallmark;refseq	62;46;5;11	Viruses;dsDNA viruses no RNA stage;Caudovirales;Siphoviridae;unclassified;unknown	Bacteria;Firmicutes;Bacilli;Bacillales;Listeriaceae;Listeria	Listeria innocua Clip11262	prophage	linear	Cluster_31
Bacilli_gi_16802048-2360689-2402391	hallmark;refseq	67;48;10;9	Viruses;dsDNA viruses no RNA stage;Caudovirales;Siphoviridae;Lambdalikevirus;unknown	Bacteria;Firmicutes;Bacilli;Bacillales;Listeriaceae;Listeria	Listeria monocytogenes EGD-e	prophage	linear	Cluster_185
Bacilli_gi_169832377-24791-58003	hallmark;refseq	42;30;3;9	Viruses;dsDNA viruses no RNA stage;Caudovirales;Siphoviridae;unknown;unknown	Bacteria;Firmicutes;Bacilli;Lactobacillales;Streptococcaceae;Streptococcus	Streptococcus pneumoniae Hungary19A-6	prophage	linear	Cluster_30
Bacilli_gi_169832377-58228-99038	hallmark;refseq	52;50;2;	Viruses;dsDNA viruses no RNA stage;Caudovirales;Siphoviridae;C2likevirus;unknown	Bacteria;Firmicutes;Bacilli;Lactobacillales;Streptococcaceae;Streptococcus	Streptococcus pneumoniae Hungary19A-6	prophage	linear	Cluster_52
Bacilli_gi_170689508	hallmark;refseq	27;20;3;4	Viruses;dsDNA viruses no RNA stage;Caudovirales;Siphoviridae;unknown;unknown	Bacteria;Firmicutes;Bacilli;Bacillales;Bacillaceae;Bacillus	Bacillus anthracis str. A0465	extrachromosomal	linear	Cluster_76
Bacilli_gi_170709180	hallmark;refseq	28;21;3;4	Viruses;dsDNA viruses no RNA stage;Caudovirales;Siphoviridae;unclassified;unknown	Bacteria;Firmicutes;Bacilli;Bacillales;Bacillaceae;Bacillus	Bacillus anthracis str. A0389	extrachromosomal	linear	Cluster_76
Bacilli_gi_177654952-9433-40354	hallmark;refseq	49;31;7;11	Viruses;dsDNA viruses no RNA stage;Caudovirales;Siphoviridae;unclassified;unknown	Bacteria;Firmicutes;Bacilli;Bacillales;Bacillaceae;Bacillus	Bacillus anthracis str. A0174	prophage	linear	Cluster_76
Bacilli_gi_177655428	hallmark;refseq	28;21;3;4	Viruses;dsDNA viruses no RNA stage;Caudovirales;Siphoviridae;unknown;unknown	Bacteria;Firmicutes;Bacilli;Bacillales;Bacillaceae;Bacillus	Bacillus anthracis str. A0174	extrachromosomal	linear	Cluster_76
Bacilli_gi_190569304	hallmark;refseq	27;21;3;3	Viruses;dsDNA viruses no RNA stage;Caudovirales;Siphoviridae;unclassified;unknown	Bacteria;Firmicutes;Bacilli;Bacillales;Bacillaceae;Bacillus	Bacillus anthracis str. Tsiankovskii-I	extrachromosomal	linear	Cluster_76
Bacilli_gi_191636824-1043463-1078200	hallmark;refseq	50;35;3;12	Viruses;dsDNA viruses no RNA stage;Caudovirales;Siphoviridae;unclassified;unknown	Bacteria;Firmicutes;Bacilli;Lactobacillales;Lactobacillaceae;Lactobacillus	Lactobacillus casei BL23	prophage	linear	Cluster_363
Bacilli_gi_194045650	hallmark;refseq	30;30;;	Viruses;dsDNA viruses no RNA stage;Caudovirales;Siphoviridae;unknown;unknown	Bacteria;Firmicutes;Bacilli;Bacillales;Staphylococcaceae;Staphylococcus	Staphylococcus aureus subsp. aureus str. JKD6009	extrachromosomal	linear	Cluster_40
Bacilli_gi_196037087-0-45570	hallmark;refseq	67;30;19;18	Viruses;dsDNA viruses no RNA stage;Caudovirales;Siphoviridae;unknown;unknown	Bacteria;Firmicutes;Bacilli;Bacillales;Bacillaceae;Bacillus	Bacillus cereus W	prophage	linear	Cluster_268
Bacilli_gi_196042459-4851-52747	hallmark;refseq	79;44;9;26	Viruses;dsDNA viruses no RNA stage;Caudovirales;Siphoviridae;unknown;unknown	Bacteria;Firmicutes;Bacilli;Bacillales;Bacillaceae;Bacillus	Bacillus cereus NVH0597-99	prophage	linear	Cluster_186
Bacilli_gi_196047581	hallmark;refseq	34;15;11;8	Viruses;dsDNA viruses no RNA stage;Caudovirales;Siphoviridae;unknown;unknown	Bacteria;Firmicutes;Bacilli;Bacillales;Bacillaceae;Bacillus	Bacillus cereus 03BB108	extrachromosomal	linear	Cluster_268
Bacilli_gi_196048419	hallmark;refseq	70;37;6;27	Viruses;dsDNA viruses no RNA stage;Caudovirales;unclassified;unclassified;unknown	Bacteria;Firmicutes;Bacilli;Bacillales;Bacillaceae;Bacillus	Bacillus cereus 03BB108	extrachromosomal	linear	Cluster_116
Bacilli_gi_196251034-0-31481	hallmark;refseq	44;27;1;16	Viruses;dsDNA viruses no RNA stage;Caudovirales;Siphoviridae;unclassified;unknown	Bacteria;Firmicutes;Bacilli;Bacillales;Bacillaceae;Geobacillus	Geobacillus sp. G11MC16	prophage	linear	Cluster_150
Bacilli_gi_197326955-40906-83132	hallmark;refseq	73;52;11;10	Viruses;dsDNA viruses no RNA stage;Caudovirales;Siphoviridae;Lambdalikevirus;unknown	Bacteria;Firmicutes;Bacilli;Bacillales;Listeriaceae;Listeria	Listeria monocytogenes FSL J1-194	prophage	linear	Cluster_185
Bacilli_gi_197327012	refseq	20;11;4;5	Viruses;dsDNA viruses no RNA stage;Caudovirales;Siphoviridae;unknown;unknown	Bacteria;Firmicutes;Bacilli;Bacillales;Listeriaceae;Listeria	Listeria monocytogenes FSL R2-503	extrachromosomal	linear	Cluster_94
Bacilli_gi_19745201-1041255-1087764	hallmark;refseq	72;55;8;9	Viruses;unclassified;unclassified;unclassified;unknown;unknown	Bacteria;Firmicutes;Bacilli;Lactobacillales;Streptococcaceae;Streptococcus	Streptococcus pyogenes MGAS8232	prophage	linear	Cluster_115
Bacilli_gi_19745201-1451819-1493398	hallmark;refseq	64;58;;6	Viruses;unclassified;unclassified;unclassified;unknown;unknown	Bacteria;Firmicutes;Bacilli;Lactobacillales;Streptococcaceae;Streptococcus	Streptococcus pyogenes MGAS8232	prophage	linear	Cluster_106
Bacilli_gi_19745201-293857-332337	hallmark;refseq	56;53;;3	Viruses;dsDNA viruses no RNA stage;Caudovirales;Siphoviridae;unknown;unknown	Bacteria;Firmicutes;Bacilli;Lactobacillales;Streptococcaceae;Streptococcus	Streptococcus pyogenes MGAS8232	prophage	linear	Cluster_30
Bacilli_gi_19745201-578068-617146	hallmark;refseq	61;51;2;8	Viruses;dsDNA viruses no RNA stage;Caudovirales;Siphoviridae;unknown;unknown	Bacteria;Firmicutes;Bacilli;Lactobacillales;Streptococcaceae;Streptococcus	Streptococcus pyogenes MGAS8232	prophage	linear	Cluster_68
Bacilli_gi_197918280	hallmark;refseq	17;11;2;4	Viruses;dsDNA viruses no RNA stage;Caudovirales;unclassified;unclassified;unknown	Bacteria;Firmicutes;Bacilli;Bacillales;Listeriaceae;Listeria	Listeria monocytogenes FSL J1-175	extrachromosomal	linear	Cluster_94
Bacilli_gi_197918293	hallmark;refseq	22;19;;3	Viruses;dsDNA viruses no RNA stage;Caudovirales;Siphoviridae;unknown;unknown	Bacteria;Firmicutes;Bacilli;Bacillales;Listeriaceae;Listeria	Listeria monocytogenes FSL J1-175	extrachromosomal	linear	Cluster_40
Bacilli_gi_197918713	hallmark;refseq	35;17;9;9	Viruses;dsDNA viruses no RNA stage;Caudovirales;Siphoviridae;unclassified;unknown	Bacteria;Firmicutes;Bacilli;Bacillales;Listeriaceae;Listeria	Listeria monocytogenes FSL J2-003	extrachromosomal	linear	Cluster_94
Bacilli_gi_197919513	hallmark;refseq	31;22;1;8	Viruses;dsDNA viruses no RNA stage;Caudovirales;Siphoviridae;unknown;unknown	Bacteria;Firmicutes;Bacilli;Bacillales;Listeriaceae;Listeria	Listeria monocytogenes FSL J2-064	extrachromosomal	linear	Cluster_162
Bacilli_gi_197919527	hallmark;refseq	17;12;2;3	Viruses;dsDNA viruses no RNA stage;Caudovirales;unclassified;;unclassified	Bacteria;Firmicutes;Bacilli;Bacillales;Listeriaceae;Listeria	Listeria monocytogenes FSL J2-064	extrachromosomal	linear	Cluster_94
Bacilli_gi_197920088-489040-524185	hallmark;refseq	53;40;10;3	Viruses;dsDNA viruses no RNA stage;Caudovirales;Siphoviridae;Lambdalikevirus;unknown	Bacteria;Firmicutes;Bacilli;Bacillales;Listeriaceae;Listeria	Listeria monocytogenes F6900	prophage	linear	Cluster_185
Bacilli_gi_197920144-35141-71365	hallmark;refseq;vdb	59;43;5;11	Viruses;dsDNA viruses no RNA stage;Caudovirales;Siphoviridae;unknown;unknown	Bacteria;Firmicutes;Bacilli;Bacillales;Listeriaceae;Listeria	Listeria monocytogenes J2818	prophage	linear	Cluster_94
Bacilli_gi_197920146	hallmark;refseq	69;52;9;8	Viruses;dsDNA viruses no RNA stage;Caudovirales;Siphoviridae;Lambdalikevirus;unknown	Bacteria;Firmicutes;Bacilli;Bacillales;Listeriaceae;Listeria	Listeria monocytogenes J2818	extrachromosomal	linear	Cluster_185
Bacilli_gi_197921361	hallmark;refseq	35;28;;7	Viruses;dsDNA viruses no RNA stage;Caudovirales;Siphoviridae;unknown;unknown	Bacteria;Firmicutes;Bacilli;Bacillales;Listeriaceae;Listeria	Listeria monocytogenes HPB2262	extrachromosomal	linear	Cluster_162
Bacilli_gi_197921362	hallmark;refseq	19;18;1;	Viruses;dsDNA viruses no RNA stage;Caudovirales;Siphoviridae;unknown;unknown	Bacteria;Firmicutes;Bacilli;Bacillales;Listeriaceae;Listeria	Listeria monocytogenes HPB2262	extrachromosomal	linear	Cluster_94
Bacilli_gi_199598923	hallmark;refseq	57;52;;5	Viruses;dsDNA viruses no RNA stage;Caudovirales;Siphoviridae;unclassified;unknown	Bacteria;Firmicutes;Bacilli;Lactobacillales;Lactobacillaceae;Lactobacillus	Lactobacillus rhamnosus HN001	extrachromosomal	linear	Cluster_127
Bacilli_gi_21281729-1528922-1576884	hallmark;refseq	66;63;2;1	Viruses;dsDNA viruses no RNA stage;Caudovirales;Siphoviridae;unclassified;unknown	Bacteria;Firmicutes;Bacilli;Bacillales;Staphylococcaceae;Staphylococcus	Staphylococcus aureus subsp. aureus MW2	prophage	linear	Cluster_6
Bacilli_gi_217963303-1387838-1431243	hallmark;refseq	68;57;4;7	Viruses;dsDNA viruses no RNA stage;Caudovirales;Siphoviridae;unclassified;unknown	Bacteria;Firmicutes;Bacilli;Bacillales;Listeriaceae;Listeria	Listeria monocytogenes HCC23	prophage	linear	Cluster_412
Bacilli_gi_218230750-2507426-2547955	hallmark;refseq	54;40;6;8	Viruses;dsDNA viruses no RNA stage;Caudovirales;Siphoviridae;unknown;unknown	Bacteria;Firmicutes;Bacilli;Bacillales;Bacillaceae;Bacillus	Bacillus cereus B4264	prophage	linear	Cluster_55
Bacilli_gi_218290702	hallmark	66;17;12;37	Viruses;dsDNA viruses no RNA stage;Caudovirales;Siphoviridae;unclassified;unknown	Bacteria;Firmicutes;Bacilli;Bacillales;Alicyclobacillaceae;Alicyclobacillus	Alicyclobacillus acidocaldarius LAA1	extrachromosomal	linear	Cluster_467
Bacilli_gi_218847808	hallmark;refseq	116;32;15;69	Viruses;dsDNA viruses no RNA stage;Caudovirales;Siphoviridae;unclassified;unclassified	Bacteria;Firmicutes;Bacilli;Bacillales;Bacillaceae;Bacillus	Bacillus cereus G9842	extrachromosomal	linear	Cluster_393
Bacilli_gi_218895141-2470312-2513147	hallmark;refseq	54;36;7;11	Viruses;dsDNA viruses no RNA stage;Caudovirales;Siphoviridae;unknown;unknown	Bacteria;Firmicutes;Bacilli;Bacillales;Bacillaceae;Bacillus	Bacillus cereus G9842	prophage	linear	Cluster_76
Bacilli_gi_21909536-1137718-1172256	hallmark;refseq	55;52;2;1	Viruses;unclassified;unclassified;unclassified;unknown;unknown	Bacteria;Firmicutes;Bacilli;Lactobacillales;Streptococcaceae;Streptococcus	Streptococcus pyogenes MGAS315	prophage	linear	Cluster_57
Bacilli_gi_21909536-1230279-1271840	hallmark;refseq	64;62;;2	Viruses;unclassified;unclassified;unclassified;unknown;unknown	Bacteria;Firmicutes;Bacilli;Lactobacillales;Streptococcaceae;Streptococcus	Streptococcus pyogenes MGAS315	prophage	linear	Cluster_106
Bacilli_gi_21909536-1313257-1351275	hallmark;refseq	60;57;1;2	Viruses;dsDNA viruses no RNA stage;Caudovirales;Siphoviridae;unclassified;unknown	Bacteria;Firmicutes;Bacilli;Lactobacillales;Streptococcaceae;Streptococcus	Streptococcus pyogenes MGAS315	prophage	linear	Cluster_196
Bacilli_gi_21909536-749188-788201	hallmark;refseq	57;55;;2	Viruses;dsDNA viruses no RNA stage;Caudovirales;Siphoviridae;unknown;unknown	Bacteria;Firmicutes;Bacilli;Lactobacillales;Streptococcaceae;Streptococcus	Streptococcus pyogenes MGAS315	prophage	linear	Cluster_30
Bacilli_gi_21909536-977412-1016695	hallmark;refseq	58;57;1;	Viruses;dsDNA viruses no RNA stage;Caudovirales;Siphoviridae;unknown;unknown	Bacteria;Firmicutes;Bacilli;Lactobacillales;Streptococcaceae;Streptococcus	Streptococcus pyogenes MGAS315	prophage	linear	Cluster_68
Bacilli_gi_221079686	hallmark;refseq	25;25;;	Viruses;dsDNA viruses no RNA stage;Caudovirales;Siphoviridae;unclassified;unknown	Bacteria;Firmicutes;Bacilli;Bacillales;Staphylococcaceae;Staphylococcus	Staphylococcus aureus subsp. aureus str. CF-Marseille	extrachromosomal	linear	Cluster_49
Bacilli_gi_221079725	hallmark;refseq	36;34;2;	Viruses;dsDNA viruses no RNA stage;Caudovirales;Siphoviridae;unclassified;unknown	Bacteria;Firmicutes;Bacilli;Bacillales;Staphylococcaceae;Staphylococcus	Staphylococcus aureus subsp. aureus str. CF-Marseille	extrachromosomal	linear	Cluster_6
Bacilli_gi_221079795	hallmark;refseq	19;19;;	Viruses;dsDNA viruses no RNA stage;Caudovirales;Siphoviridae;unknown;unknown	Bacteria;Firmicutes;Bacilli;Bacillales;Staphylococcaceae;Staphylococcus	Staphylococcus aureus subsp. aureus str. CF-Marseille	extrachromosomal	linear	Cluster_40
Bacilli_gi_221079809	refseq	20;18;2;	Viruses;dsDNA viruses no RNA stage;Caudovirales;Siphoviridae;unknown;unknown	Bacteria;Firmicutes;Bacilli;Bacillales;Staphylococcaceae;Staphylococcus	Staphylococcus aureus subsp. aureus str. CF-Marseille	extrachromosomal	linear	Cluster_6
Bacilli_gi_221230948-1487839-1526889	hallmark;refseq	52;51;1;	Viruses;dsDNA viruses no RNA stage;Caudovirales;Siphoviridae;C2likevirus;unknown	Bacteria;Firmicutes;Bacilli;Lactobacillales;Streptococcaceae;Streptococcus	Streptococcus pneumoniae ATCC 700669	prophage	linear	Cluster_52
Bacilli_gi_221316922	hallmark	74;24;10;40	Viruses;dsDNA viruses no RNA stage;Caudovirales;Siphoviridae;unclassified;unknown	Bacteria;Firmicutes;Bacilli;Bacillales;Bacillaceae;Bacillus	Bacillus cereus Q1	extrachromosomal	linear	Cluster_150
Bacilli_gi_223044298	hallmark;refseq	59;47;4;8	Viruses;dsDNA viruses no RNA stage;Caudovirales;Siphoviridae;unclassified;unknown	Bacteria;Firmicutes;Bacilli;Bacillales;Staphylococcaceae;Staphylococcus	Staphylococcus capitis SK14	extrachromosomal	linear	Cluster_35
Bacilli_gi_223933165-0-37690	hallmark;refseq	56;33;9;14	Viruses;dsDNA viruses no RNA stage;Caudovirales;Siphoviridae;unknown;unknown	Bacteria;Firmicutes;Bacilli;Lactobacillales;Streptococcaceae;Streptococcus	Streptococcus suis 89/1591	prophage	linear	Cluster_50
Bacilli_gi_223933546	hallmark;refseq	41;26;4;11	Viruses;dsDNA viruses no RNA stage;Caudovirales;Siphoviridae;unknown;unknown	Bacteria;Firmicutes;Bacilli;Lactobacillales;Streptococcaceae;Streptococcus	Streptococcus suis 89/1591	extrachromosomal	linear	Cluster_57
Bacilli_gi_224580166-104901-142362	hallmark;refseq;vdb	54;38;3;13	Viruses;dsDNA viruses no RNA stage;Caudovirales;Siphoviridae;unknown;unknown	Bacteria;Firmicutes;Bacilli;Lactobacillales;Streptococcaceae;Streptococcus	Streptococcus infantarius subsp. infantarius ATCC BAA-102	prophage	linear	Cluster_57
Bacilli_gi_22536185-1833293-1867142	hallmark;refseq	49;35;5;9	Viruses;dsDNA viruses no RNA stage;Caudovirales;Siphoviridae;unknown;unknown	Bacteria;Firmicutes;Bacilli;Lactobacillales;Streptococcaceae;Streptococcus	Streptococcus agalactiae 2603V/R	prophage	linear	Cluster_30
Bacilli_gi_22536185-558801-608722	hallmark;refseq;vdb	78;40;18;20	Viruses;dsDNA viruses no RNA stage;Caudovirales;Siphoviridae;unclassified;unknown	Bacteria;Firmicutes;Bacilli;Lactobacillales;Streptococcaceae;Streptococcus	Streptococcus agalactiae 2603V/R	prophage	linear	Cluster_62
Bacilli_gi_225855735-24325-60932	hallmark;refseq	60;47;4;9	Viruses;dsDNA viruses no RNA stage;Caudovirales;Siphoviridae;unclassified;unknown	Bacteria;Firmicutes;Bacilli;Lactobacillales;Streptococcaceae;Streptococcus	Streptococcus pneumoniae P1031	prophage	linear	Cluster_31
Bacilli_gi_225869487-1742324-1775791	hallmark;refseq	43;32;4;7	Viruses;unclassified phages;;;unknown;unknown	Bacteria;Firmicutes;Bacilli;Lactobacillales;Streptococcaceae;Streptococcus	Streptococcus equi subsp. equi 4047	prophage	linear	Cluster_115
Bacilli_gi_238801476-3248097-3274994	hallmark;refseq	35;28;3;4	Viruses;dsDNA viruses no RNA stage;Caudovirales;Siphoviridae;unclassified;unknown	Bacteria;Firmicutes;Bacilli;Bacillales;Bacillaceae;Bacillus	Bacillus cereus BDRD-ST26	prophage	linear	Cluster_55
Bacilli_gi_238801489-3326471-3348798	hallmark;refseq	27;21;4;2	Viruses;dsDNA viruses no RNA stage;Caudovirales;Siphoviridae;unknown;unknown	Bacteria;Firmicutes;Bacilli;Bacillales;Bacillaceae;Bacillus	Bacillus cereus AH603	prophage	linear	Cluster_76
Bacilli_gi_238801498-3721238-3752580	hallmark;refseq	47;32;5;10	Viruses;dsDNA viruses no RNA stage;Caudovirales;Siphoviridae;unknown;unknown	Bacteria;Firmicutes;Bacilli;Bacillales;Bacillaceae;Bacillus	Bacillus thuringiensis serovar tochigiensis BGSC 4Y1	prophage	linear	Cluster_55
Bacilli_gi_238801502-3570308-3596189	hallmark;refseq	31;23;2;6	Viruses;dsDNA viruses no RNA stage;Caudovirales;Siphoviridae;unclassified;unknown	Bacteria;Firmicutes;Bacilli;Bacillales;Bacillaceae;Bacillus	Bacillus thuringiensis serovar pakistani str. T13001	prophage	linear	Cluster_76
Bacilli_gi_238801511-375045-392169	hallmark;refseq	30;27;;3	Viruses;dsDNA viruses no RNA stage;Caudovirales;Siphoviridae;Lambdalikevirus;unknown	Bacteria;Firmicutes;Bacilli;Bacillales;Bacillaceae;Bacillus	Bacillus thuringiensis IBL 4222	prophage	linear	Cluster_55
Bacilli_gi_238801511-6544650-6563909	hallmark;refseq	31;26;4;1	Viruses;dsDNA viruses no RNA stage;unknown;Tectiviridae;Tectivirus;unknown	Bacteria;Firmicutes;Bacilli;Bacillales;Bacillaceae;Bacillus	Bacillus thuringiensis IBL 4222	prophage	linear	Cluster_125
Bacilli_gi_238854975	hallmark;refseq	62;42;6;14	Viruses;dsDNA viruses no RNA stage;Caudovirales;Siphoviridae;unknown;unknown	Bacteria;Firmicutes;Bacilli;Lactobacillales;Lactobacillaceae;Lactobacillus	Lactobacillus jensenii 269-3	extrachromosomal	linear	Cluster_473
Bacilli_gi_239633784-516453-546930	hallmark;refseq;vdb	42;27;7;8	Viruses;dsDNA viruses no RNA stage;Caudovirales;Siphoviridae;unknown;unknown	Bacteria;Firmicutes;Bacilli;Lactobacillales;Enterococcaceae;Enterococcus	Enterococcus faecium Com12	prophage	linear	Cluster_90
Bacilli_gi_239948566-843944-882994	hallmark;refseq	61;43;6;12	Viruses;dsDNA viruses no RNA stage;Caudovirales;Siphoviridae;unknown;unknown	Bacteria;Firmicutes;Bacilli;Lactobacillales;Enterococcaceae;Enterococcus	Enterococcus faecalis T1	prophage	linear	Cluster_178
Bacilli_gi_239948577-632907-671957	hallmark;refseq	62;43;6;13	Viruses;dsDNA viruses no RNA stage;Caudovirales;Siphoviridae;unknown;unknown	Bacteria;Firmicutes;Bacilli;Lactobacillales;Enterococcaceae;Enterococcus	Enterococcus faecalis T3	prophage	linear	Cluster_178
Bacilli_gi_239948585-620256-656470	hallmark;refseq	55;39;4;12	Viruses;dsDNA viruses no RNA stage;Caudovirales;Siphoviridae;unknown;unknown	Bacteria;Firmicutes;Bacilli;Lactobacillales;Enterococcaceae;Enterococcus	Enterococcus faecalis ATCC 4200	prophage	linear	Cluster_41
Bacilli_gi_242355587-478649-518482	hallmark;refseq	64;50;5;9	Viruses;dsDNA viruses no RNA stage;Caudovirales;Siphoviridae;unknown;unknown	Bacteria;Firmicutes;Bacilli;Lactobacillales;Enterococcaceae;Enterococcus	Enterococcus faecalis X98	prophage	linear	Cluster_41
Bacilli_gi_242355587-843387-883784	hallmark;refseq	65;45;7;13	Viruses;dsDNA viruses no RNA stage;Caudovirales;Siphoviridae;unknown;unknown	Bacteria;Firmicutes;Bacilli;Lactobacillales;Enterococcaceae;Enterococcus	Enterococcus faecalis X98	prophage	linear	Cluster_178
Bacilli_gi_242355652-20677-52016	hallmark;refseq	47;24;6;17	Viruses;dsDNA viruses no RNA stage;Caudovirales;Myoviridae;Punalikevirus;unknown	Bacteria;Firmicutes;Bacilli;Lactobacillales;Enterococcaceae;Enterococcus	Enterococcus faecium 1,231,502	prophage	linear	Cluster_250
Bacilli_gi_242361992	hallmark;refseq	47;42;1;4	Viruses;unclassified phages;unknown;unknown;unknown;unknown	Bacteria;Firmicutes;Bacilli;Lactobacillales;Enterococcaceae;Enterococcus	Enterococcus faecalis HIP11704	extrachromosomal	linear	Cluster_107
Bacilli_gi_242362035-373302-413505	hallmark;refseq	62;44;3;15	Viruses;dsDNA viruses no RNA stage;Caudovirales;Siphoviridae;unknown;unknown	Bacteria;Firmicutes;Bacilli;Lactobacillales;Enterococcaceae;Enterococcus	Enterococcus faecalis E1Sol	prophage	linear	Cluster_41
Bacilli_gi_242364200	hallmark;refseq	48;38;1;9	Viruses;unclassified phages;unknown;unknown;unknown;unknown	Bacteria;Firmicutes;Bacilli;Lactobacillales;Enterococcaceae;Enterococcus	Enterococcus faecalis T2	extrachromosomal	linear	Cluster_107
Bacilli_gi_242364220	hallmark;refseq	21;13;2;6	Viruses;dsDNA viruses no RNA stage;Caudovirales;Siphoviridae;unclassified;unknown	Bacteria;Firmicutes;Bacilli;Lactobacillales;Enterococcaceae;Enterococcus	Enterococcus faecalis DS5	extrachromosomal	linear	Cluster_17
Bacilli_gi_242364291-479779-521001	hallmark;refseq	55;49;;6	Viruses;dsDNA viruses no RNA stage;Caudovirales;Siphoviridae;unknown;unknown	Bacteria;Firmicutes;Bacilli;Lactobacillales;Enterococcaceae;Enterococcus	Enterococcus faecalis Merz96	prophage	linear	Cluster_41
Bacilli_gi_242364322-195-41921	hallmark;refseq	59;50;;9	Viruses;dsDNA viruses no RNA stage;Caudovirales;Siphoviridae;unclassified;unknown	Bacteria;Firmicutes;Bacilli;Lactobacillales;Lactobacillaceae;Lactobacillus	Lactobacillus rhamnosus LMS2-1	prophage	linear	Cluster_133
Bacilli_gi_251781468-1569185-1604459	hallmark;refseq	59;49;1;9	Viruses;dsDNA viruses no RNA stage;Caudovirales;Siphoviridae;unclassified;unknown	Bacteria;Firmicutes;Bacilli;Lactobacillales;Streptococcaceae;Streptococcus	Streptococcus dysgalactiae subsp. equisimilis GGS_124	prophage	linear	Cluster_196
Bacilli_gi_251833060	hallmark;refseq	64;25;3;36	Viruses;dsDNA viruses no RNA stage;Caudovirales;Siphoviridae;Phic3unalikevirus;unknown	Bacteria;Firmicutes;Bacilli;Lactobacillales;Lactobacillaceae;Lactobacillus	Lactobacillus vaginalis ATCC 49540	extrachromosomal	linear	Cluster_32
Bacilli_gi_251833322	hallmark	42;12;17;13	Viruses;dsDNA viruses no RNA stage;Caudovirales;Siphoviridae;unclassified;unknown	Bacteria;Firmicutes;Bacilli;Lactobacillales;Lactobacillaceae;Lactobacillus	Lactobacillus reuteri CF48-3A	extrachromosomal	linear	Cluster_42
Bacilli_gi_251833402-71867-102264	hallmark;refseq	32;15;5;12	Viruses;dsDNA viruses no RNA stage;Caudovirales;Siphoviridae;unclassified;unknown	Bacteria;Firmicutes;Bacilli;Lactobacillales;Lactobacillaceae;Lactobacillus	Lactobacillus reuteri MM2-3	prophage	linear	Cluster_32
Bacilli_gi_251833405	hallmark	37;11;5;21	Viruses;dsDNA viruses no RNA stage;Caudovirales;Siphoviridae;unclassified;unknown	Bacteria;Firmicutes;Bacilli;Lactobacillales;Lactobacillaceae;Lactobacillus	Lactobacillus reuteri MM2-3	extrachromosomal	linear	Cluster_32
Bacilli_gi_254036981-363884-405812	hallmark;refseq	67;65;2;	Viruses;dsDNA viruses no RNA stage;Caudovirales;Siphoviridae;unclassified;unknown	Bacteria;Firmicutes;Bacilli;Bacillales;Staphylococcaceae;Staphylococcus	Staphylococcus aureus subsp. aureus 132	prophage	linear	Cluster_8
Bacilli_gi_254036985-101925-147819	hallmark;refseq	62;58;4;	Viruses;dsDNA viruses no RNA stage;Caudovirales;Siphoviridae;unclassified;unknown	Bacteria;Firmicutes;Bacilli;Bacillales;Staphylococcaceae;Staphylococcus	Staphylococcus aureus subsp. aureus 132	prophage	linear	Cluster_6
Bacilli_gi_254555169-1024403-1064133	hallmark;refseq	53;36;2;15	Viruses;dsDNA viruses no RNA stage;Caudovirales;Siphoviridae;unknown;unknown	Bacteria;Firmicutes;Bacilli;Lactobacillales;Lactobacillaceae;Lactobacillus	Lactobacillus plantarum JDM1	prophage	linear	Cluster_32
Bacilli_gi_255926317-326405-368856	hallmark;refseq	66;64;;2	Viruses;dsDNA viruses no RNA stage;Caudovirales;Siphoviridae;unclassified;unknown	Bacteria;Firmicutes;Bacilli;Bacillales;Staphylococcaceae;Staphylococcus	Staphylococcus aureus subsp. aureus USA300_TCH959	prophage	linear	Cluster_8
Bacilli_gi_256402468	hallmark;refseq	24;23;1;	Viruses;dsDNA viruses no RNA stage;Caudovirales;Siphoviridae;unclassified;unknown	Bacteria;Firmicutes;Bacilli;Bacillales;Staphylococcaceae;Staphylococcus	Staphylococcus aureus A9781	extrachromosomal	linear	Cluster_35
Bacilli_gi_257427710-567989-612181	hallmark;refseq	64;58;5;1	Viruses;dsDNA viruses no RNA stage;Caudovirales;Siphoviridae;unclassified;unknown	Bacteria;Firmicutes;Bacilli;Bacillales;Staphylococcaceae;Staphylococcus	Staphylococcus aureus subsp. aureus 65-1322	prophage	linear	Cluster_6
Bacilli_gi_257430852-0-34240	hallmark;refseq	58;55;1;2	Viruses;dsDNA viruses no RNA stage;Caudovirales;Siphoviridae;unknown;unknown	Bacteria;Firmicutes;Bacilli;Bacillales;Staphylococcaceae;Staphylococcus	Staphylococcus aureus subsp. aureus 68-397	prophage	linear	Cluster_56
Bacilli_gi_257431371-0-33726	hallmark;refseq	57;51;3;3	Viruses;dsDNA viruses no RNA stage;Caudovirales;Siphoviridae;unclassified;unknown	Bacteria;Firmicutes;Bacilli;Bacillales;Staphylococcaceae;Staphylococcus	Staphylococcus aureus subsp. aureus 68-397	prophage	linear	Cluster_8
Bacilli_gi_257433049-139222-180874	hallmark;refseq	63;57;4;2	Viruses;dsDNA viruses no RNA stage;Caudovirales;Siphoviridae;unclassified;unknown	Bacteria;Firmicutes;Bacilli;Bacillales;Staphylococcaceae;Staphylococcus	Staphylococcus aureus subsp. aureus E1410	prophage	linear	Cluster_8
Bacilli_gi_257436456-0-37773	hallmark;refseq	59;54;1;4	Viruses;dsDNA viruses no RNA stage;Caudovirales;Siphoviridae;unknown;unknown	Bacteria;Firmicutes;Bacilli;Bacillales;Staphylococcaceae;Staphylococcus	Staphylococcus aureus subsp. aureus M876	prophage	linear	Cluster_56
Bacilli_gi_257436992-0-34673	hallmark;refseq	57;51;3;3	Viruses;dsDNA viruses no RNA stage;Caudovirales;Siphoviridae;unclassified;unknown	Bacteria;Firmicutes;Bacilli;Bacillales;Staphylococcaceae;Staphylococcus	Staphylococcus aureus subsp. aureus M876	prophage	linear	Cluster_8
Bacilli_gi_258420277	hallmark;refseq	32;31;1;	Viruses;dsDNA viruses no RNA stage;Caudovirales;Siphoviridae;unclassified;unknown	Bacteria;Firmicutes;Bacilli;Bacillales;Staphylococcaceae;Staphylococcus	Staphylococcus aureus A9719	extrachromosomal	linear	Cluster_6
Bacilli_gi_258421696	hallmark;refseq	24;24;;	Viruses;dsDNA viruses no RNA stage;Caudovirales;Siphoviridae;unclassified;unknown	Bacteria;Firmicutes;Bacilli;Bacillales;Staphylococcaceae;Staphylococcus	Staphylococcus aureus A9719	extrachromosomal	linear	Cluster_35
Bacilli_gi_258427119	hallmark;refseq	33;32;1;	Viruses;dsDNA viruses no RNA stage;Caudovirales;Siphoviridae;unclassified;unknown	Bacteria;Firmicutes;Bacilli;Bacillales;Staphylococcaceae;Staphylococcus	Staphylococcus aureus A9299	extrachromosomal	linear	Cluster_6
Bacilli_gi_258428675	refseq	27;24;3;	Viruses;dsDNA viruses no RNA stage;Caudovirales;Siphoviridae;unknown;unknown	Bacteria;Firmicutes;Bacilli;Bacillales;Staphylococcaceae;Staphylococcus	Staphylococcus aureus A9299	extrachromosomal	linear	Cluster_6
Bacilli_gi_258428979	hallmark;refseq	31;30;1;	Viruses;dsDNA viruses no RNA stage;Caudovirales;Siphoviridae;Lambdalikevirus;unknown	Bacteria;Firmicutes;Bacilli;Bacillales;Staphylococcaceae;Staphylococcus	Staphylococcus aureus A9299	extrachromosomal	linear	Cluster_35
Bacilli_gi_258440728	hallmark;refseq	37;36;1;	Viruses;dsDNA viruses no RNA stage;Caudovirales;Siphoviridae;unclassified;unknown	Bacteria;Firmicutes;Bacilli;Bacillales;Staphylococcaceae;Staphylococcus	Staphylococcus aureus A8115	extrachromosomal	linear	Cluster_8
Bacilli_gi_258443244	hallmark;refseq	35;35;;	Viruses;dsDNA viruses no RNA stage;Caudovirales;Siphoviridae;unknown;unknown	Bacteria;Firmicutes;Bacilli;Bacillales;Staphylococcaceae;Staphylococcus	Staphylococcus aureus A8115	extrachromosomal	linear	Cluster_56
Bacilli_gi_258445228	hallmark;refseq	24;22;1;1	Viruses;dsDNA viruses no RNA stage;Caudovirales;Siphoviridae;Lambdalikevirus;unknown	Bacteria;Firmicutes;Bacilli;Bacillales;Staphylococcaceae;Staphylococcus	Staphylococcus aureus A6300	extrachromosomal	linear	Cluster_49
Bacilli_gi_258445554	hallmark;refseq	36;34;2;	Viruses;dsDNA viruses no RNA stage;Caudovirales;Siphoviridae;unclassified;unknown	Bacteria;Firmicutes;Bacilli;Bacillales;Staphylococcaceae;Staphylococcus	Staphylococcus aureus A6300	extrachromosomal	linear	Cluster_6
Bacilli_gi_258446363	hallmark;refseq	28;26;2;	Viruses;dsDNA viruses no RNA stage;Caudovirales;Siphoviridae;Lambdalikevirus;unknown	Bacteria;Firmicutes;Bacilli;Bacillales;Staphylococcaceae;Staphylococcus	Staphylococcus aureus A6300	extrachromosomal	linear	Cluster_49
Bacilli_gi_258447767	hallmark;refseq	22;21;1;	Viruses;dsDNA viruses no RNA stage;Caudovirales;Siphoviridae;Lambdalikevirus;unknown	Bacteria;Firmicutes;Bacilli;Bacillales;Staphylococcaceae;Staphylococcus	Staphylococcus aureus A6224	extrachromosomal	linear	Cluster_49
Bacilli_gi_258448816	hallmark;refseq	66;62;4;	Viruses;dsDNA viruses no RNA stage;Caudovirales;Siphoviridae;unclassified;unknown	Bacteria;Firmicutes;Bacilli;Bacillales;Staphylococcaceae;Staphylococcus	Staphylococcus aureus A6224	extrachromosomal	linear	Cluster_6
Bacilli_gi_258448883-0-41097	hallmark;refseq	65;57;8;	Viruses;dsDNA viruses no RNA stage;Caudovirales;Siphoviridae;Lambdalikevirus;unknown	Bacteria;Firmicutes;Bacilli;Bacillales;Staphylococcaceae;Staphylococcus	Staphylococcus aureus A6224	prophage	linear	Cluster_8
Bacilli_gi_258455538	hallmark;refseq	68;61;7;	Viruses;dsDNA viruses no RNA stage;Caudovirales;Siphoviridae;unclassified;unknown	Bacteria;Firmicutes;Bacilli;Bacillales;Staphylococcaceae;Staphylococcus	Staphylococcus aureus A5937	extrachromosomal	linear	Cluster_6
Bacilli_gi_260663785	hallmark;refseq	31;19;3;9	Viruses;dsDNA viruses no RNA stage;Caudovirales;Siphoviridae;unknown;unknown	Bacteria;Firmicutes;Bacilli;Lactobacillales;Lactobacillaceae;Lactobacillus	Lactobacillus fermentum 28-3-CHN	extrachromosomal	linear	Cluster_41
Bacilli_gi_260667551	hallmark;refseq	51;30;2;19	Viruses;dsDNA viruses no RNA stage;Caudovirales;Siphoviridae;unclassified;unknown	Bacteria;Firmicutes;Bacilli;Bacillales;Staphylococcaceae;Staphylococcus	Staphylococcus aureus	extrachromosomal	linear	Cluster_56
Bacilli_gi_262046743-72999-126896	hallmark;refseq	84;39;7;38	Viruses;dsDNA viruses no RNA stage;Caudovirales;Siphoviridae;unclassified;unknown	Bacteria;Firmicutes;Bacilli;Lactobacillales;Lactobacillaceae;Lactobacillus	Lactobacillus crispatus MV-3A-US	prophage	linear	Cluster_206
Bacilli_gi_262047904	hallmark;refseq	15;10;1;4	Viruses;dsDNA viruses no RNA stage;Caudovirales;Siphoviridae;Phic3unalikevirus;unknown	Bacteria;Firmicutes;Bacilli;Lactobacillales;Lactobacillaceae;Lactobacillus	Lactobacillus crispatus MV-3A-US	extrachromosomal	linear	Cluster_528
Bacilli_gi_262047917	hallmark;refseq	15;10;;5	Viruses;dsDNA viruses no RNA stage;Caudovirales;Siphoviridae;Phic3unalikevirus;unknown	Bacteria;Firmicutes;Bacilli;Lactobacillales;Lactobacillaceae;Lactobacillus	Lactobacillus crispatus MV-3A-US	extrachromosomal	linear	Cluster_528
Bacilli_gi_262049860	hallmark;refseq	62;58;4;	Viruses;dsDNA viruses no RNA stage;Caudovirales;Siphoviridae;unclassified;unknown	Bacteria;Firmicutes;Bacilli;Bacillales;Staphylococcaceae;Staphylococcus	Staphylococcus aureus D30	extrachromosomal	linear	Cluster_6
Bacilli_gi_262052887	hallmark;refseq	29;27;1;1	Viruses;dsDNA viruses no RNA stage;Caudovirales;Siphoviridae;unclassified;unknown	Bacteria;Firmicutes;Bacilli;Bacillales;Staphylococcaceae;Staphylococcus	Staphylococcus aureus 930918-3	extrachromosomal	linear	Cluster_6
Bacilli_gi_262052910	hallmark;refseq	29;26;1;2	Viruses;dsDNA viruses no RNA stage;Caudovirales;Siphoviridae;unclassified;unknown	Bacteria;Firmicutes;Bacilli;Bacillales;Staphylococcaceae;Staphylococcus	Staphylococcus aureus 930918-3	extrachromosomal	linear	Cluster_49
Bacilli_gi_262053142	hallmark;refseq	10;10;;	Viruses;dsDNA viruses no RNA stage;Caudovirales;Siphoviridae;unknown;unknown	Bacteria;Firmicutes;Bacilli;Bacillales;Staphylococcaceae;Staphylococcus	Staphylococcus aureus 930918-3	extrachromosomal	linear	Cluster_56
Bacilli_gi_268318562-730561-765995	hallmark;refseq	51;35;2;14	Viruses;dsDNA viruses no RNA stage;Caudovirales;Siphoviridae;unknown;unknown	Bacteria;Firmicutes;Bacilli;Lactobacillales;Lactobacillaceae;Lactobacillus	Lactobacillus johnsonii FI9785	prophage	linear	Cluster_41
Bacilli_gi_269201690-2044749-2087988	hallmark;refseq	63;57;1;5	Viruses;dsDNA viruses no RNA stage;Caudovirales;Siphoviridae;Lambdalikevirus;unknown	Bacteria;Firmicutes;Bacilli;Bacillales;Staphylococcaceae;Staphylococcus	Staphylococcus aureus subsp. aureus ED98	prophage	linear	Cluster_6
Bacilli_gi_282904457-0-30668	hallmark;refseq	49;45;3;1	Viruses;dsDNA viruses no RNA stage;Caudovirales;Siphoviridae;Lambdalikevirus;unknown	Bacteria;Firmicutes;Bacilli;Bacillales;Staphylococcaceae;Staphylococcus	Staphylococcus aureus subsp. aureus C160	prophage	linear	Cluster_8
Bacilli_gi_282905315-580508-628042	hallmark;refseq	64;58;4;2	Viruses;dsDNA viruses no RNA stage;Caudovirales;Siphoviridae;unclassified;unknown	Bacteria;Firmicutes;Bacilli;Bacillales;Staphylococcaceae;Staphylococcus	Staphylococcus aureus subsp. aureus Btn1260	prophage	linear	Cluster_6
Bacilli_gi_282910944-156063-204266	hallmark;refseq	64;62;1;1	Viruses;dsDNA viruses no RNA stage;Caudovirales;Siphoviridae;unclassified;unknown	Bacteria;Firmicutes;Bacilli;Bacillales;Staphylococcaceae;Staphylococcus	Staphylococcus aureus subsp. aureus WBG10049	prophage	linear	Cluster_6
Bacilli_gi_282914756	hallmark;refseq	48;47;1;	Viruses;dsDNA viruses no RNA stage;Caudovirales;Siphoviridae;unknown;unknown	Bacteria;Firmicutes;Bacilli;Bacillales;Staphylococcaceae;Staphylococcus	Staphylococcus aureus subsp. aureus M899	extrachromosomal	linear	Cluster_56
Bacilli_gi_282914805	hallmark;refseq	17;17;;	Viruses;dsDNA viruses no RNA stage;Caudovirales;Siphoviridae;unclassified;unknown	Bacteria;Firmicutes;Bacilli;Bacillales;Staphylococcaceae;Staphylococcus	Staphylococcus aureus subsp. aureus M899	extrachromosomal	linear	Cluster_40
Bacilli_gi_282919869-0-28714	hallmark;refseq	37;35;2;	Viruses;dsDNA viruses no RNA stage;Caudovirales;Siphoviridae;unclassified;unknown	Bacteria;Firmicutes;Bacilli;Bacillales;Staphylococcaceae;Staphylococcus	Staphylococcus aureus A9765	prophage	linear	Cluster_35
Bacilli_gi_282921678-84843-117175	hallmark;refseq	39;37;1;1	Viruses;dsDNA viruses no RNA stage;Caudovirales;Siphoviridae;unclassified;unknown	Bacteria;Firmicutes;Bacilli;Bacillales;Staphylococcaceae;Staphylococcus	Staphylococcus aureus A9765	prophage	linear	Cluster_6
Bacilli_gi_282924532-0-34588	hallmark;refseq	56;54;1;1	Viruses;dsDNA viruses no RNA stage;Caudovirales;Siphoviridae;unknown;unknown	Bacteria;Firmicutes;Bacilli;Bacillales;Staphylococcaceae;Staphylococcus	Staphylococcus aureus subsp. aureus C101	prophage	linear	Cluster_56
Bacilli_gi_282925249	hallmark;refseq	17;17;;	Viruses;dsDNA viruses no RNA stage;Caudovirales;Siphoviridae;unclassified;unknown	Bacteria;Firmicutes;Bacilli;Bacillales;Staphylococcaceae;Staphylococcus	Staphylococcus aureus subsp. aureus C101	extrachromosomal	linear	Cluster_40
Bacilli_gi_282926077	hallmark;refseq	42;40;1;1	Viruses;dsDNA viruses no RNA stage;Caudovirales;Siphoviridae;unknown;unknown	Bacteria;Firmicutes;Bacilli;Bacillales;Staphylococcaceae;Staphylococcus	Staphylococcus aureus A9765	extrachromosomal	linear	Cluster_56
Bacilli_gi_282929075	hallmark;refseq	47;37;8;2	Viruses;dsDNA viruses no RNA stage;Caudovirales;Siphoviridae;unclassified;unknown	Bacteria;Firmicutes;Bacilli;Bacillales;Staphylococcaceae;Staphylococcus	Staphylococcus aureus A10102	extrachromosomal	linear	Cluster_8
Bacilli_gi_284800255-1291115-1335717	hallmark;refseq	67;51;4;12	Viruses;dsDNA viruses no RNA stage;Caudovirales;Siphoviridae;unclassified;unknown	Bacteria;Firmicutes;Bacilli;Bacillales;Listeriaceae;Listeria	Listeria monocytogenes 08-5578	prophage	linear	Cluster_162
Bacilli_gi_284800255-2477841-2512950	hallmark;refseq	58;45;9;4	Viruses;dsDNA viruses no RNA stage;Caudovirales;Siphoviridae;unknown;unknown	Bacteria;Firmicutes;Bacilli;Bacillales;Listeriaceae;Listeria	Listeria monocytogenes 08-5578	prophage	linear	Cluster_94
Bacilli_gi_284993440-1257819-1302421	hallmark;refseq	67;51;4;12	Viruses;dsDNA viruses no RNA stage;Caudovirales;Siphoviridae;unclassified;unknown	Bacteria;Firmicutes;Bacilli;Bacillales;Listeriaceae;Listeria	Listeria monocytogenes 08-5923	prophage	linear	Cluster_162
Bacilli_gi_284993440-2444572-2479681	hallmark;refseq	58;45;9;4	Viruses;dsDNA viruses no RNA stage;Caudovirales;Siphoviridae;unknown;unknown	Bacteria;Firmicutes;Bacilli;Bacillales;Listeriaceae;Listeria	Listeria monocytogenes 08-5923	prophage	linear	Cluster_94
Bacilli_gi_288904223-449737-494815	hallmark;refseq;vdb	58;41;4;13	Viruses;dsDNA viruses no RNA stage;Caudovirales;Siphoviridae;unknown;unknown	Bacteria;Firmicutes;Bacilli;Lactobacillales;Streptococcaceae;Streptococcus	Streptococcus gallolyticus UCN34	prophage	linear	Cluster_88
Bacilli_gi_28894912-1107932-1147568	hallmark;refseq	57;55;;2	Viruses;dsDNA viruses no RNA stage;Caudovirales;Siphoviridae;unknown;unknown	Bacteria;Firmicutes;Bacilli;Lactobacillales;Streptococcaceae;Streptococcus	Streptococcus pyogenes SSI-1	prophage	linear	Cluster_30
Bacilli_gi_28894912-545611-583628	hallmark;refseq	60;57;1;2	Viruses;dsDNA viruses no RNA stage;Caudovirales;Siphoviridae;unclassified;unknown	Bacteria;Firmicutes;Bacilli;Lactobacillales;Streptococcaceae;Streptococcus	Streptococcus pyogenes SSI-1	prophage	linear	Cluster_196
Bacilli_gi_28894912-625045-666606	hallmark;refseq	64;62;;2	Viruses;unclassified;unclassified;unclassified;unknown;unknown	Bacteria;Firmicutes;Bacilli;Lactobacillales;Streptococcaceae;Streptococcus	Streptococcus pyogenes SSI-1	prophage	linear	Cluster_106
Bacilli_gi_28894912-724628-759166	hallmark;refseq	55;52;2;1	Viruses;unclassified;unclassified;unclassified;unknown;unknown	Bacteria;Firmicutes;Bacilli;Lactobacillales;Streptococcaceae;Streptococcus	Streptococcus pyogenes SSI-1	prophage	linear	Cluster_57
Bacilli_gi_28894912-880188-919089	hallmark;refseq	60;58;1;1	Viruses;dsDNA viruses no RNA stage;Caudovirales;Siphoviridae;unknown;unknown	Bacteria;Firmicutes;Bacilli;Lactobacillales;Streptococcaceae;Streptococcus	Streptococcus pyogenes SSI-1	prophage	linear	Cluster_68
Bacilli_gi_289166909-398200-442838	hallmark;refseq	74;56;4;14	Viruses;dsDNA viruses no RNA stage;Caudovirales;Siphoviridae;unclassified;unknown	Bacteria;Firmicutes;Bacilli;Lactobacillales;Streptococcaceae;Streptococcus	Streptococcus mitis B6	prophage	linear	Cluster_15
Bacilli_gi_289166909-738608-743776	noncaudo	4;3;1;	Viruses;ssDNA viruses;unknown;Inoviridae;Plectrovirus;unknown	Bacteria;Firmicutes;Bacilli;Lactobacillales;Streptococcaceae;Streptococcus	Streptococcus mitis B6	prophage	linear	Cluster_143
Bacilli_gi_289566704	hallmark;refseq	27;16;3;8	Viruses;dsDNA viruses no RNA stage;Caudovirales;Siphoviridae;unclassified;unknown	Bacteria;Firmicutes;Bacilli;Lactobacillales;Enterococcaceae;Enterococcus	Enterococcus faecium D344SRF	extrachromosomal	linear	Cluster_6
Bacilli_gi_289566803	hallmark;refseq	22;20;;2	Viruses;dsDNA viruses no RNA stage;Caudovirales;Siphoviridae;unknown;unknown	Bacteria;Firmicutes;Bacilli;Lactobacillales;Enterococcaceae;Enterococcus	Enterococcus faecium D344SRF	extrachromosomal	linear	Cluster_119
Bacilli_gi_289567068	hallmark;refseq	17;16;;1	Viruses;dsDNA viruses no RNA stage;Caudovirales;Siphoviridae;unclassified;unknown	Bacteria;Firmicutes;Bacilli;Lactobacillales;Enterococcaceae;Enterococcus	Enterococcus faecium D344SRF	extrachromosomal	linear	Cluster_41
Bacilli_gi_289567086	hallmark;refseq	18;11;2;5	Viruses;dsDNA viruses no RNA stage;Caudovirales;Myoviridae;Punalikevirus;unknown	Bacteria;Firmicutes;Bacilli;Lactobacillales;Enterococcaceae;Enterococcus	Enterococcus faecium D344SRF	extrachromosomal	linear	Cluster_222
Bacilli_gi_289567104	refseq;vdb	12;6;4;2	Viruses;dsDNA viruses no RNA stage;Caudovirales;unclassified;unknown;unknown	Bacteria;Firmicutes;Bacilli;Lactobacillales;Enterococcaceae;Enterococcus	Enterococcus faecium D344SRF	extrachromosomal	linear	Cluster_350
Bacilli_gi_289567117	hallmark;refseq	17;14;1;2	Viruses;unclassified;unclassified;unclassified;unclassified;unknown	Bacteria;Firmicutes;Bacilli;Lactobacillales;Enterococcaceae;Enterococcus	Enterococcus faecium D344SRF	extrachromosomal	linear	Cluster_145
Bacilli_gi_290891479	hallmark;refseq	46;28;4;14	Viruses;dsDNA viruses no RNA stage;Caudovirales;Siphoviridae;unknown;unknown	Bacteria;Firmicutes;Bacilli;Lactobacillales;Leuconostocaceae;Oenococcus	Oenococcus oeni AWRIB429	extrachromosomal	linear	Cluster_32
Bacilli_gi_290891529	hallmark;refseq	51;49;;2	Viruses;dsDNA viruses no RNA stage;Caudovirales;Siphoviridae;unknown;unknown	Bacteria;Firmicutes;Bacilli;Lactobacillales;Leuconostocaceae;Oenococcus	Oenococcus oeni AWRIB429	extrachromosomal	linear	Cluster_32
Bacilli_gi_290891575	hallmark;refseq	19;15;1;3	Viruses;dsDNA viruses no RNA stage;Caudovirales;Siphoviridae;unknown;unknown	Bacteria;Firmicutes;Bacilli;Lactobacillales;Leuconostocaceae;Oenococcus	Oenococcus oeni AWRIB429	extrachromosomal	linear	Cluster_157
Bacilli_gi_293379989	hallmark;refseq	52;22;5;25	Viruses;dsDNA viruses no RNA stage;Caudovirales;Siphoviridae;unknown;unknown	Bacteria;Firmicutes;Bacilli;Lactobacillales;Lactobacillaceae;Lactobacillus	Lactobacillus crispatus 214-1	extrachromosomal	linear	Cluster_206
Bacilli_gi_293380154	hallmark;refseq	17;9;2;6	Viruses;dsDNA viruses no RNA stage;Caudovirales;Siphoviridae;unknown;unknown	Bacteria;Firmicutes;Bacilli;Lactobacillales;Lactobacillaceae;Lactobacillus	Lactobacillus crispatus 214-1	extrachromosomal	linear	Cluster_206
Bacilli_gi_293510791	hallmark;refseq	17;17;;	Viruses;dsDNA viruses no RNA stage;Caudovirales;Siphoviridae;unclassified;unknown	Bacteria;Firmicutes;Bacilli;Bacillales;Staphylococcaceae;Staphylococcus	Staphylococcus aureus subsp. aureus M809	extrachromosomal	linear	Cluster_40
Bacilli_gi_293530869-0-34116	hallmark;refseq	56;54;1;1	Viruses;dsDNA viruses no RNA stage;Caudovirales;Siphoviridae;unknown;unknown	Bacteria;Firmicutes;Bacilli;Bacillales;Staphylococcaceae;Staphylococcus	Staphylococcus aureus subsp. aureus M1015	prophage	linear	Cluster_56
Bacilli_gi_293545390	hallmark;refseq	17;17;;	Viruses;dsDNA viruses no RNA stage;Caudovirales;Siphoviridae;unclassified;unknown	Bacteria;Firmicutes;Bacilli;Bacillales;Staphylococcaceae;Staphylococcus	Staphylococcus aureus subsp. aureus M1015	extrachromosomal	linear	Cluster_40
Bacilli_gi_293553367	hallmark;refseq	31;19;6;6	Viruses;dsDNA viruses no RNA stage;Caudovirales;Siphoviridae;unknown;unknown	Bacteria;Firmicutes;Bacilli;Lactobacillales;Enterococcaceae;Enterococcus	Enterococcus faecium E1039	extrachromosomal	linear	Cluster_90
Bacilli_gi_293553727	hallmark;refseq	31;19;2;10	Viruses;dsDNA viruses no RNA stage;Caudovirales;Siphoviridae;Lambdalikevirus;unknown	Bacteria;Firmicutes;Bacilli;Lactobacillales;Enterococcaceae;Enterococcus	Enterococcus faecium E1039	extrachromosomal	linear	Cluster_41
Bacilli_gi_293570856	hallmark;refseq	44;23;11;10	Viruses;dsDNA viruses no RNA stage;Caudovirales;Siphoviridae;Lambdalikevirus;unknown	Bacteria;Firmicutes;Bacilli;Lactobacillales;Enterococcaceae;Enterococcus	Enterococcus faecium E980	extrachromosomal	linear	Cluster_32
Bacilli_gi_293572592	hallmark;refseq	48;25;9;14	Viruses;dsDNA viruses no RNA stage;Caudovirales;Siphoviridae;unclassified;unknown	Bacteria;Firmicutes;Bacilli;Lactobacillales;Enterococcaceae;Enterococcus	Enterococcus faecium E980	extrachromosomal	linear	Cluster_41
Bacilli_gi_29374661-289329-326210	hallmark;refseq	55;50;1;4	Viruses;dsDNA viruses no RNA stage;Caudovirales;Siphoviridae;unknown;unknown	Bacteria;Firmicutes;Bacilli;Lactobacillales;Enterococcaceae;Enterococcus	Enterococcus faecalis V583	prophage	linear	Cluster_17
Bacilli_gi_294614749	hallmark;refseq	28;14;5;9	Viruses;dsDNA viruses no RNA stage;Caudovirales;Myoviridae;Punalikevirus;unknown	Bacteria;Firmicutes;Bacilli;Lactobacillales;Enterococcaceae;Enterococcus	Enterococcus faecium E1636	extrachromosomal	linear	Cluster_222
Bacilli_gi_294616019	hallmark;refseq	23;19;;4	Viruses;dsDNA viruses no RNA stage;Caudovirales;Siphoviridae;unknown;unknown	Bacteria;Firmicutes;Bacilli;Lactobacillales;Enterococcaceae;Enterococcus	Enterococcus faecium E1636	extrachromosomal	linear	Cluster_119
Bacilli_gi_294617236	hallmark;refseq	18;12;2;4	Viruses;dsDNA viruses no RNA stage;Caudovirales;Siphoviridae;unknown;unknown	Bacteria;Firmicutes;Bacilli;Lactobacillales;Enterococcaceae;Enterococcus	Enterococcus faecium E1679	extrachromosomal	linear	Cluster_52
Bacilli_gi_294617253	refseq	8;5;3;	Viruses;dsDNA viruses no RNA stage;Caudovirales;Siphoviridae;unknown;unknown	Bacteria;Firmicutes;Bacilli;Lactobacillales;Enterococcaceae;Enterococcus	Enterococcus faecium E1679	extrachromosomal	linear	Cluster_90
Bacilli_gi_294619674	refseq	27;13;4;10	Viruses;dsDNA viruses no RNA stage;Caudovirales;Siphoviridae;unknown;unknown	Bacteria;Firmicutes;Bacilli;Lactobacillales;Enterococcaceae;Enterococcus	Enterococcus faecium E1679	extrachromosomal	linear	Cluster_30
Bacilli_gi_294622454	hallmark;refseq	51;24;11;16	Viruses;dsDNA viruses no RNA stage;Caudovirales;Myoviridae;Punalikevirus;unknown	Bacteria;Firmicutes;Bacilli;Lactobacillales;Enterococcaceae;Enterococcus	Enterococcus faecium U0317	extrachromosomal	linear	Cluster_250
Bacilli_gi_294780266-5960-38382	hallmark;refseq	49;33;2;14	Viruses;dsDNA viruses no RNA stage;Caudovirales;Siphoviridae;unknown;unknown	Bacteria;Firmicutes;Bacilli;Lactobacillales;Enterococcaceae;Enterococcus	Enterococcus faecalis PC1.1	prophage	linear	Cluster_30
Bacilli_gi_294848397-86711-134161	hallmark;refseq	67;64;2;1	Viruses;dsDNA viruses no RNA stage;Caudovirales;Siphoviridae;unclassified;unknown	Bacteria;Firmicutes;Bacilli;Bacillales;Staphylococcaceae;Staphylococcus	Staphylococcus aureus A9754	prophage	linear	Cluster_6
Bacilli_gi_295406379-166170-200939	hallmark;refseq	59;58;1;	Viruses;dsDNA viruses no RNA stage;Caudovirales;Siphoviridae;Lambdalikevirus;unknown	Bacteria;Firmicutes;Bacilli;Bacillales;Staphylococcaceae;Staphylococcus	Staphylococcus aureus A8819	prophage	linear	Cluster_8
Bacilli_gi_295407444-2839-30993	hallmark;refseq	38;37;;1	Viruses;dsDNA viruses no RNA stage;Caudovirales;Siphoviridae;unknown;unknown	Bacteria;Firmicutes;Bacilli;Bacillales;Staphylococcaceae;Staphylococcus	Staphylococcus aureus A8819	prophage	linear	Cluster_40
Bacilli_gi_295407487	hallmark;refseq	52;50;2;	Viruses;dsDNA viruses no RNA stage;Caudovirales;Siphoviridae;unclassified;unknown	Bacteria;Firmicutes;Bacilli;Bacillales;Staphylococcaceae;Staphylococcus	Staphylococcus aureus A8819	extrachromosomal	linear	Cluster_8
Bacilli_gi_295407538	hallmark;refseq	35;34;1;	Viruses;dsDNA viruses no RNA stage;Caudovirales;Siphoviridae;unclassified;unknown	Bacteria;Firmicutes;Bacilli;Bacillales;Staphylococcaceae;Staphylococcus	Staphylococcus aureus A8819	extrachromosomal	linear	Cluster_6
Bacilli_gi_295407646	refseq	26;22;4;	Viruses;dsDNA viruses no RNA stage;Caudovirales;Siphoviridae;unknown;unknown	Bacteria;Firmicutes;Bacilli;Bacillales;Staphylococcaceae;Staphylococcus	Staphylococcus aureus A8819	extrachromosomal	linear	Cluster_6
Bacilli_gi_295427484-583274-630529	hallmark;refseq	69;65;4;	Viruses;dsDNA viruses no RNA stage;Caudovirales;Siphoviridae;unclassified;unknown	Bacteria;Firmicutes;Bacilli;Bacillales;Staphylococcaceae;Staphylococcus	Staphylococcus aureus subsp. aureus EMRSA16	prophage	linear	Cluster_6
Bacilli_gi_295823229	hallmark;refseq	25;25;;	Viruses;dsDNA viruses no RNA stage;Caudovirales;Siphoviridae;unknown;unknown	Bacteria;Firmicutes;Bacilli;Bacillales;Staphylococcaceae;Staphylococcus	Staphylococcus aureus subsp. aureus MR1	extrachromosomal	linear	Cluster_40
Bacilli_gi_295823231	hallmark;refseq	22;22;;	Viruses;dsDNA viruses no RNA stage;Caudovirales;Siphoviridae;unclassified;unknown	Bacteria;Firmicutes;Bacilli;Bacillales;Staphylococcaceae;Staphylococcus	Staphylococcus aureus subsp. aureus MR1	extrachromosomal	linear	Cluster_49
Bacilli_gi_295823236	hallmark;refseq	20;19;1;	Viruses;dsDNA viruses no RNA stage;Caudovirales;Siphoviridae;unclassified;unknown	Bacteria;Firmicutes;Bacilli;Bacillales;Staphylococcaceae;Staphylococcus	Staphylococcus aureus subsp. aureus MR1	extrachromosomal	linear	Cluster_6
Bacilli_gi_296500838-2496144-2537191	hallmark;refseq	52;33;8;11	Viruses;dsDNA viruses no RNA stage;Caudovirales;Siphoviridae;unknown;unknown	Bacteria;Firmicutes;Bacilli;Bacillales;Bacillaceae;Bacillus	Bacillus thuringiensis BMB171	prophage	linear	Cluster_76
Bacilli_gi_297210119-386629-430201	hallmark;refseq	61;58;2;1	Viruses;dsDNA viruses no RNA stage;Caudovirales;Siphoviridae;unclassified;unknown	Bacteria;Firmicutes;Bacilli;Bacillales;Staphylococcaceae;Staphylococcus	Staphylococcus aureus subsp. aureus ATCC 51811	prophage	linear	Cluster_6
Bacilli_gi_297210123	hallmark;refseq	11;10;;1	Viruses;dsDNA viruses no RNA stage;Caudovirales;Siphoviridae;unknown;unknown	Bacteria;Firmicutes;Bacilli;Bacillales;Staphylococcaceae;Staphylococcus	Staphylococcus aureus subsp. aureus ATCC 51811	extrachromosomal	linear	Cluster_56
Bacilli_gi_297245106-166113-184964	hallmark;refseq	42;41;1;	Viruses;dsDNA viruses no RNA stage;Caudovirales;Siphoviridae;unknown;unknown	Bacteria;Firmicutes;Bacilli;Bacillales;Staphylococcaceae;Staphylococcus	Staphylococcus aureus A8796	prophage	linear	Cluster_8
Bacilli_gi_297246568	hallmark;refseq	32;31;1;	Viruses;dsDNA viruses no RNA stage;Caudovirales;Siphoviridae;unclassified;unknown	Bacteria;Firmicutes;Bacilli;Bacillales;Staphylococcaceae;Staphylococcus	Staphylococcus aureus A8796	extrachromosomal	linear	Cluster_6
Bacilli_gi_297246647	hallmark;refseq	29;28;1;	Viruses;dsDNA viruses no RNA stage;Caudovirales;Siphoviridae;Lambdalikevirus;unknown	Bacteria;Firmicutes;Bacilli;Bacillales;Staphylococcaceae;Staphylococcus	Staphylococcus aureus A8796	extrachromosomal	linear	Cluster_49
Bacilli_gi_298527634-2267561-2314536	hallmark;refseq	65;61;4;	Viruses;dsDNA viruses no RNA stage;Caudovirales;Siphoviridae;unclassified;unknown	Bacteria;Firmicutes;Bacilli;Bacillales;Staphylococcaceae;Staphylococcus	Staphylococcus aureus subsp. aureus MN8	prophage	linear	Cluster_6
Bacilli_gi_300765818	hallmark;refseq	77;73;2;2	Viruses;dsDNA viruses no RNA stage;Caudovirales;Siphoviridae;unknown;unknown	Bacteria;Firmicutes;Bacilli;Bacillales;Listeriaceae;Listeria	Listeria monocytogenes FSL N1-017	extrachromosomal	linear	Cluster_29
Bacilli_gi_300766147	hallmark;refseq	40;32;;8	Viruses;dsDNA viruses no RNA stage;Caudovirales;Siphoviridae;unclassified;unknown	Bacteria;Firmicutes;Bacilli;Bacillales;Listeriaceae;Listeria	Listeria monocytogenes FSL N1-017	extrachromosomal	linear	Cluster_162
Bacilli_gi_300766274	hallmark;refseq	38;28;4;6	Viruses;dsDNA viruses no RNA stage;Caudovirales;Siphoviridae;unknown;unknown	Bacteria;Firmicutes;Bacilli;Bacillales;Listeriaceae;Listeria	Listeria monocytogenes FSL N1-017	extrachromosomal	linear	Cluster_94
Bacilli_gi_300766310	hallmark;refseq	25;21;4;	Viruses;dsDNA viruses no RNA stage;Caudovirales;Siphoviridae;Lambdalikevirus;unknown	Bacteria;Firmicutes;Bacilli;Bacillales;Listeriaceae;Listeria	Listeria monocytogenes FSL N1-017	extrachromosomal	linear	Cluster_185
Bacilli_gi_300860136-583915-626439	hallmark;refseq	63;62;;1	Viruses;dsDNA viruses no RNA stage;Caudovirales;Siphoviridae;unknown;unknown	Bacteria;Firmicutes;Bacilli;Lactobacillales;Enterococcaceae;Enterococcus	Enterococcus faecalis TUSoD Ef11	prophage	linear	Cluster_41
Bacilli_gi_301299418	refseq	25;15;2;8	Viruses;dsDNA viruses no RNA stage;Caudovirales;Siphoviridae;unknown;unknown	Bacteria;Firmicutes;Bacilli;Lactobacillales;Lactobacillaceae;Lactobacillus	Lactobacillus salivarius ACS-116-V-Col5a	extrachromosomal	linear	Cluster_88
Bacilli_gi_301299539	hallmark;refseq	18;11;4;3	Viruses;dsDNA viruses no RNA stage;Caudovirales;Siphoviridae;Lambdalikevirus;unknown	Bacteria;Firmicutes;Bacilli;Lactobacillales;Lactobacillaceae;Lactobacillus	Lactobacillus salivarius ACS-116-V-Col5a	extrachromosomal	linear	Cluster_32
Bacilli_gi_301300595	hallmark;refseq	20;11;5;4	Viruses;dsDNA viruses no RNA stage;Caudovirales;Siphoviridae;unknown;unknown	Bacteria;Firmicutes;Bacilli;Lactobacillales;Lactobacillaceae;Lactobacillus	Lactobacillus salivarius ACS-116-V-Col5a	extrachromosomal	linear	Cluster_52
Bacilli_gi_301300708	hallmark;refseq	46;20;3;23	Viruses;dsDNA viruses no RNA stage;Caudovirales;Siphoviridae;unclassified;unknown	Bacteria;Firmicutes;Bacilli;Lactobacillales;Lactobacillaceae;Lactobacillus	Lactobacillus salivarius ACS-116-V-Col5a	extrachromosomal	linear	Cluster_6
Bacilli_gi_303255421	hallmark;refseq	48;36;2;10	Viruses;dsDNA viruses no RNA stage;Caudovirales;Siphoviridae;unknown;unknown	Bacteria;Firmicutes;Bacilli;Lactobacillales;Streptococcaceae;Streptococcus	Streptococcus pneumoniae BS455	extrachromosomal	linear	Cluster_31
Bacilli_gi_303255644-0-32908	hallmark;refseq	58;38;3;17	Viruses;dsDNA viruses no RNA stage;Caudovirales;Siphoviridae;unclassified;unclassified	Bacteria;Firmicutes;Bacilli;Lactobacillales;Streptococcaceae;Streptococcus	Streptococcus pneumoniae BS455	prophage	linear	Cluster_50
Bacilli_gi_303259084-189885-216145	hallmark;refseq	47;36;2;9	Viruses;dsDNA viruses no RNA stage;Caudovirales;Siphoviridae;unknown;unknown	Bacteria;Firmicutes;Bacilli;Lactobacillales;Streptococcaceae;Streptococcus	Streptococcus pneumoniae SP-BS293	prophage	linear	Cluster_31
Bacilli_gi_303260813-209928-244198	hallmark;refseq	54;43;2;9	Viruses;dsDNA viruses no RNA stage;Caudovirales;Siphoviridae;unknown;unknown	Bacteria;Firmicutes;Bacilli;Lactobacillales;Streptococcaceae;Streptococcus	Streptococcus pneumoniae SP14-BS292	prophage	linear	Cluster_31
Bacilli_gi_303263141-210757-245027	hallmark;refseq	54;43;2;9	Viruses;dsDNA viruses no RNA stage;Caudovirales;Siphoviridae;unknown;unknown	Bacteria;Firmicutes;Bacilli;Lactobacillales;Streptococcaceae;Streptococcus	Streptococcus pneumoniae BS397	prophage	linear	Cluster_31
Bacilli_gi_303265420-110956-137418	hallmark;refseq	47;36;2;9	Viruses;dsDNA viruses no RNA stage;Caudovirales;Siphoviridae;unknown;unknown	Bacteria;Firmicutes;Bacilli;Lactobacillales;Streptococcaceae;Streptococcus	Streptococcus pneumoniae BS457	prophage	linear	Cluster_31
Bacilli_gi_303267755-75727-109991	hallmark;refseq	54;43;2;9	Viruses;dsDNA viruses no RNA stage;Caudovirales;Siphoviridae;unknown;unknown	Bacteria;Firmicutes;Bacilli;Lactobacillales;Streptococcaceae;Streptococcus	Streptococcus pneumoniae BS458	prophage	linear	Cluster_31
Bacilli_gi_306828415	hallmark;refseq	59;51;1;7	Viruses;dsDNA viruses no RNA stage;Caudovirales;Siphoviridae;unknown;unknown	Bacteria;Firmicutes;Bacilli;Lactobacillales;Streptococcaceae;Streptococcus	Streptococcus pyogenes ATCC 10782	extrachromosomal	linear	Cluster_106
Bacilli_gi_307126151-1989757-2030527	hallmark;refseq	64;44;3;17	Viruses;dsDNA viruses no RNA stage;Caudovirales;Siphoviridae;unclassified;unclassified	Bacteria;Firmicutes;Bacilli;Lactobacillales;Streptococcaceae;Streptococcus	Streptococcus pneumoniae 670-6B	prophage	linear	Cluster_50
Bacilli_gi_307710001-0-28645	hallmark;refseq	52;37;1;14	Viruses;dsDNA viruses no RNA stage;Caudovirales;Siphoviridae;unknown;unknown	Bacteria;Firmicutes;Bacilli;Lactobacillales;Streptococcaceae;Streptococcus	Streptococcus mitis SK564	prophage	linear	Cluster_31
Bacilli_gi_308171891-870032-907063	hallmark;refseq	52;33;5;14	Viruses;dsDNA viruses no RNA stage;Caudovirales;Siphoviridae;Lambdalikevirus;unknown	Bacteria;Firmicutes;Bacilli;Bacillales;Bacillaceae;Bacillus	Bacillus amyloliquefaciens DSM 7	prophage	linear	Cluster_6
Bacilli_gi_309804985	hallmark;refseq	56;29;5;22	Viruses;dsDNA viruses no RNA stage;Caudovirales;Siphoviridae;unknown;unknown	Bacteria;Firmicutes;Bacilli;Lactobacillales;Lactobacillaceae;Lactobacillus	Lactobacillus iners LactinV 09V1-c	extrachromosomal	linear	Cluster_334
Bacilli_gi_309806790	hallmark;refseq	54;30;4;20	Viruses;dsDNA viruses no RNA stage;Caudovirales;Siphoviridae;unknown;unknown	Bacteria;Firmicutes;Bacilli;Lactobacillales;Lactobacillaceae;Lactobacillus	Lactobacillus iners LactinV 03V1-b	extrachromosomal	linear	Cluster_334
Bacilli_gi_311744845-1757962-1803995	hallmark;refseq	65;62;2;1	Viruses;dsDNA viruses no RNA stage;Caudovirales;Siphoviridae;unclassified;unknown	Bacteria;Firmicutes;Bacilli;Bacillales;Staphylococcaceae;Staphylococcus	Staphylococcus aureus subsp. aureus TCH70	prophage	linear	Cluster_6
Bacilli_gi_312868614	hallmark;refseq	32;17;2;13	Viruses;dsDNA viruses no RNA stage;Caudovirales;Siphoviridae;unknown;unknown	Bacteria;Firmicutes;Bacilli;Lactobacillales;Lactobacillaceae;Lactobacillus	Lactobacillus oris PB013-T2-3	extrachromosomal	linear	Cluster_88
Bacilli_gi_312870611	hallmark;refseq	25;14;3;8	Viruses;dsDNA viruses no RNA stage;Caudovirales;Siphoviridae;unknown;unknown	Bacteria;Firmicutes;Bacilli;Lactobacillales;Lactobacillaceae;Lactobacillus	Lactobacillus oris PB013-T2-3	extrachromosomal	linear	Cluster_41
Bacilli_gi_312873770	hallmark;refseq	51;30;3;18	Viruses;dsDNA viruses no RNA stage;Caudovirales;Siphoviridae;unclassified;unknown	Bacteria;Firmicutes;Bacilli;Lactobacillales;Lactobacillaceae;Lactobacillus	Lactobacillus iners LEAF 2052A-d	extrachromosomal	linear	Cluster_68
Bacilli_gi_312977117-201829-259634	hallmark;refseq;vdb	87;37;18;32	Viruses;dsDNA viruses no RNA stage;Caudovirales;Siphoviridae;unknown;unknown	Bacteria;Firmicutes;Bacilli;Lactobacillales;Lactobacillaceae;Lactobacillus	Lactobacillus crispatus CTV-05	prophage	linear	Cluster_206
Bacilli_gi_315037230-1441600-1487975	hallmark;refseq	66;34;5;27	Viruses;dsDNA viruses no RNA stage;Caudovirales;Siphoviridae;unknown;unknown	Bacteria;Firmicutes;Bacilli;Lactobacillales;Lactobacillaceae;Lactobacillus	Lactobacillus amylovorus GRL 1112	prophage	linear	Cluster_52
Bacilli_gi_315649228-69696-99291	hallmark;refseq	37;22;5;10	Viruses;dsDNA viruses no RNA stage;Caudovirales;Myoviridae;unknown;unknown	Bacteria;Firmicutes;Bacilli;Bacillales;Paenibacillaceae;Paenibacillus	Paenibacillus vortex V453	prophage	linear	Cluster_15
Bacilli_gi_323649861-519095-555231	hallmark;refseq;vdb	47;28;2;17	Viruses;dsDNA viruses no RNA stage;Caudovirales;Siphoviridae;unclassified;unknown	Bacteria;Firmicutes;Bacilli;Lactobacillales;Lactobacillaceae;Lactobacillus	Lactobacillus ruminis ATCC 25644	prophage	linear	Cluster_399
Bacilli_gi_323650955	hallmark;refseq	102;40;18;44	Viruses;dsDNA viruses no RNA stage;Caudovirales;unclassified;unclassified;unclassified	Bacteria;Firmicutes;Bacilli;Bacillales;Bacillaceae;Bacillus	Bacillus subtilis subsp. natto	extrachromosomal	linear	Cluster_333
Bacilli_gi_325681573	hallmark;refseq	58;25;8;25	Viruses;dsDNA viruses no RNA stage;Caudovirales;Siphoviridae;unclassified;unknown	Bacteria;Firmicutes;Bacilli;Lactobacillales;Lactobacillaceae;Lactobacillus	Lactobacillus reuteri MM4-1A	extrachromosomal	linear	Cluster_32
Bacilli_gi_325912757	hallmark;refseq	55;28;5;22	Viruses;dsDNA viruses no RNA stage;Caudovirales;Siphoviridae;unknown;unknown	Bacteria;Firmicutes;Bacilli;Lactobacillales;Lactobacillaceae;Lactobacillus	Lactobacillus iners UPII 60-B	extrachromosomal	linear	Cluster_334
Bacilli_gi_329115710-658321-693683	hallmark;refseq	56;32;3;21	Viruses;dsDNA viruses no RNA stage;Caudovirales;Siphoviridae;unknown;unknown	Bacteria;Firmicutes;Bacilli;Lactobacillales;Streptococcaceae;Streptococcus	Streptococcus parauberis NCFD 2020	prophage	linear	Cluster_30
Bacilli_gi_332522132-235929-273638	hallmark;refseq	59;36;5;18	Viruses;dsDNA viruses no RNA stage;Caudovirales;Siphoviridae;unclassified;unknown	Bacteria;Firmicutes;Bacilli;Lactobacillales;Streptococcaceae;Streptococcus	Streptococcus porcinus str. Jelinkova 176	prophage	linear	Cluster_62
Bacilli_gi_335029684-0-26362	hallmark;refseq	39;33;2;4	Viruses;dsDNA viruses no RNA stage;Caudovirales;Siphoviridae;unclassified;unknown	Bacteria;Firmicutes;Bacilli;Lactobacillales;Streptococcaceae;Streptococcus	Streptococcus infantis SK1076	prophage	linear	Cluster_31
Bacilli_gi_335038930	hallmark;refseq	19;10;4;5	Viruses;dsDNA viruses no RNA stage;Caudovirales;Siphoviridae;unclassified;unclassified	Bacteria;Firmicutes;Bacilli;Bacillales;Bacillaceae;Caldalkalibacillus	Caldalkalibacillus thermarum TA2.A1	extrachromosomal	linear	Cluster_135
Bacilli_gi_336232954-9022-28680	hallmark;refseq	19;11;;8	Viruses;dsDNA viruses no RNA stage;Caudovirales;unclassified;unclassified;unknown	Bacteria;Firmicutes;Bacilli;Lactobacillales;Lactobacillaceae;Lactobacillus	Lactobacillus coryniformis subsp. torquens KCTC 3535	prophage	linear	Cluster_401
Bacilli_gi_336232955	hallmark;refseq	48;20;5;23	Viruses;dsDNA viruses no RNA stage;Caudovirales;Siphoviridae;unclassified;unknown	Bacteria;Firmicutes;Bacilli;Lactobacillales;Lactobacillaceae;Lactobacillus	Lactobacillus coryniformis subsp. torquens KCTC 3535	extrachromosomal	linear	Cluster_127
Bacilli_gi_336232957	hallmark;refseq	45;34;1;10	Viruses;dsDNA viruses no RNA stage;Caudovirales;Siphoviridae;unknown;unknown	Bacteria;Firmicutes;Bacilli;Lactobacillales;Lactobacillaceae;Lactobacillus	Lactobacillus coryniformis subsp. torquens KCTC 3535	extrachromosomal	linear	Cluster_70
Bacilli_gi_336233546-739015-780180	hallmark;refseq	67;41;2;24	Viruses;dsDNA viruses no RNA stage;Caudovirales;Siphoviridae;Lambdalikevirus;unknown	Bacteria;Firmicutes;Bacilli;Bacillales;Bacillaceae;Geobacillus	Geobacillus thermoglucosidasius C56-YS93	prophage	linear	Cluster_20
Bacilli_gi_339302712	hallmark;refseq	57;28;5;24	Viruses;dsDNA viruses no RNA stage;Caudovirales;Siphoviridae;Lambdalikevirus;unknown	Bacteria;Firmicutes;Bacilli;Lactobacillales;Leuconostocaceae;Leuconostoc	Leuconostoc pseudomesenteroides KCTC 3652	extrachromosomal	linear	Cluster_32
Bacilli_gi_339434019	hallmark;refseq	27;14;1;12	Viruses;dsDNA viruses no RNA stage;Caudovirales;Siphoviridae;unknown;unknown	Bacteria;Firmicutes;Bacilli;Lactobacillales;Leuconostocaceae;Fructobacillus	Fructobacillus fructosus KCTC 3544	extrachromosomal	linear	Cluster_41
Bacilli_gi_339434028	hallmark;refseq	20;14;2;4	Viruses;dsDNA viruses no RNA stage;Caudovirales;Siphoviridae;unknown;unknown	Bacteria;Firmicutes;Bacilli;Lactobacillales;Leuconostocaceae;Fructobacillus	Fructobacillus fructosus KCTC 3544	extrachromosomal	linear	Cluster_41
Bacilli_gi_339434036	hallmark;refseq;vdb	19;11;2;6	Viruses;dsDNA viruses no RNA stage;Caudovirales;Siphoviridae;unclassified;unknown	Bacteria;Firmicutes;Bacilli;Lactobacillales;Leuconostocaceae;Fructobacillus	Fructobacillus fructosus KCTC 3544	extrachromosomal	linear	Cluster_143
Bacilli_gi_354585674-8738-62189	hallmark	75;24;9;42	Viruses;dsDNA viruses no RNA stage;Caudovirales;Siphoviridae;unclassified;unknown	Bacteria;Firmicutes;Bacilli;Bacillales;Paenibacillaceae;Paenibacillus	Paenibacillus lactis 154	prophage	linear	Cluster_105
Bacilli_gi_356908030	refseq	100;30;16;54	Viruses;dsDNA viruses no RNA stage;Caudovirales;unclassified;unclassified;unclassified	Bacteria;Firmicutes;Bacilli;Bacillales;Paenibacillaceae;Paenibacillus	Paenibacillus elgii B69	extrachromosomal	linear	Cluster_294
Bacilli_gi_356908039	refseq	73;21;5;47	Viruses;dsDNA viruses no RNA stage;Caudovirales;Siphoviridae;Spbetalikevirus;unknown	Bacteria;Firmicutes;Bacilli;Bacillales;Paenibacillaceae;Paenibacillus	Paenibacillus elgii B69	extrachromosomal	linear	Cluster_211
Bacilli_gi_356908088	hallmark	63;13;7;43	Viruses;dsDNA viruses no RNA stage;Caudovirales;unclassified;;unclassified	Bacteria;Firmicutes;Bacilli;Bacillales;Paenibacillaceae;Paenibacillus	Paenibacillus elgii B69	extrachromosomal	linear	Cluster_152
Bacilli_gi_356908153	hallmark	12;4;2;6	Viruses;dsDNA viruses no RNA stage;Caudovirales;Siphoviridae;Spbetalikevirus;unknown	Bacteria;Firmicutes;Bacilli;Bacillales;Paenibacillaceae;Paenibacillus	Paenibacillus elgii B69	extrachromosomal	linear	Cluster_526
Bacilli_gi_357238088-227639-250404	hallmark;refseq	29;21;2;6	Viruses;dsDNA viruses no RNA stage;Caudovirales;Siphoviridae;Lambdalikevirus;unknown	Bacteria;Firmicutes;Bacilli;Lactobacillales;Streptococcaceae;Streptococcus	Streptococcus ictaluri 707-05	prophage	linear	Cluster_20
Bacilli_gi_357238483-407714-430480	hallmark;refseq	35;24;4;7	Viruses;dsDNA viruses no RNA stage;Caudovirales;Siphoviridae;unclassified;unknown	Bacteria;Firmicutes;Bacilli;Lactobacillales;Streptococcaceae;Streptococcus	Streptococcus ictaluri 707-05	prophage	linear	Cluster_17
Bacilli_gi_358052789-12117-19962	hallmark;refseq	10;9;1;	Viruses;dsDNA viruses no RNA stage;Caudovirales;Siphoviridae;unknown;unknown	Bacteria;Firmicutes;Bacilli;Bacillales;Staphylococcaceae;Staphylococcus	Staphylococcus simiae CCM 7213	prophage	linear	Cluster_143
Bacilli_gi_365164259	hallmark;refseq	95;41;17;37	Viruses;dsDNA viruses no RNA stage;Caudovirales;Siphoviridae;unknown;unknown	Bacteria;Firmicutes;Bacilli;Bacillales;Bacillaceae;Bacillus	Bacillus sp. 7_6_55CFAA_CT2	extrachromosomal	linear	Cluster_186
Bacilli_gi_365822010	hallmark;refseq	23;13;3;7	Viruses;dsDNA viruses no RNA stage;Caudovirales;Siphoviridae;unclassified;unknown	Bacteria;Firmicutes;Bacilli;Lactobacillales;Lactobacillaceae;Lactobacillus	Lactobacillus suebicus KCTC 3549	extrachromosomal	linear	Cluster_32
Bacilli_gi_365822121	hallmark;refseq	22;14;4;4	Viruses;dsDNA viruses no RNA stage;Caudovirales;Siphoviridae;unclassified;unknown	Bacteria;Firmicutes;Bacilli;Lactobacillales;Lactobacillaceae;Lactobacillus	Lactobacillus mali KCTC 3596 = DSM 20444	extrachromosomal	linear	Cluster_32
Bacilli_gi_365822134	hallmark;refseq	24;21;1;2	Viruses;dsDNA viruses no RNA stage;Caudovirales;Siphoviridae;unclassified;unknown	Bacteria;Firmicutes;Bacilli;Lactobacillales;Lactobacillaceae;Lactobacillus	Lactobacillus mali KCTC 3596 = DSM 20444	extrachromosomal	linear	Cluster_289
Bacilli_gi_365822176	hallmark;refseq	18;14;3;1	Viruses;dsDNA viruses no RNA stage;Caudovirales;Siphoviridae;unknown;unknown	Bacteria;Firmicutes;Bacilli;Lactobacillales;Lactobacillaceae;Lactobacillus	Lactobacillus mali KCTC 3596 = DSM 20444	extrachromosomal	linear	Cluster_52
Bacilli_gi_365822285	refseq	35;29;1;5	Viruses;dsDNA viruses no RNA stage;Caudovirales;Siphoviridae;unknown;unknown	Bacteria;Firmicutes;Bacilli;Lactobacillales;Lactobacillaceae;Lactobacillus	Lactobacillus zeae KCTC 3804	extrachromosomal	linear	Cluster_133
Bacilli_gi_365822846	hallmark;refseq	50;28;1;21	Viruses;dsDNA viruses no RNA stage;Caudovirales;Siphoviridae;unclassified;unknown	Bacteria;Firmicutes;Bacilli;Lactobacillales;Lactobacillaceae;Lactobacillus	Lactobacillus acidipiscis KCTC 13900	extrachromosomal	linear	Cluster_127
Bacilli_gi_365854193	hallmark	19;6;1;12	Viruses;dsDNA viruses no RNA stage;Caudovirales;Siphoviridae;unknown;unknown	Bacteria;Firmicutes;Bacilli;Lactobacillales;Lactobacillaceae;Lactobacillus	Lactobacillus parafarraginis F0439	extrachromosomal	linear	Cluster_8
Bacilli_gi_365854313	hallmark	16;7;2;7	Viruses;dsDNA viruses no RNA stage;Caudovirales;Siphoviridae;unclassified;unknown	Bacteria;Firmicutes;Bacilli;Lactobacillales;Lactobacillaceae;Lactobacillus	Lactobacillus parafarraginis F0439	extrachromosomal	linear	Cluster_95
Bacilli_gi_365854317	hallmark;refseq	82;32;19;31	Viruses;dsDNA viruses no RNA stage;Caudovirales;Siphoviridae;unclassified;unknown	Bacteria;Firmicutes;Bacilli;Lactobacillales;Lactobacillaceae;Lactobacillus	Lactobacillus parafarraginis F0439	extrachromosomal	linear	Cluster_32
Bacilli_gi_373466296-15209-60043	hallmark;refseq	60;30;4;26	Viruses;dsDNA viruses no RNA stage;Caudovirales;Siphoviridae;Phic3unalikevirus;unknown	Bacteria;Firmicutes;Bacilli;Lactobacillales;Lactobacillaceae;Lactobacillus	Lactobacillus kisonensis F0435	prophage	linear	Cluster_32
Bacilli_gi_374601708-0-104377	hallmark;refseq	86;35;22;29	Viruses;dsDNA viruses no RNA stage;Caudovirales;Siphoviridae;unknown;unknown	Bacteria;Firmicutes;Bacilli;Bacillales;Paenibacillaceae;Paenibacillus	Paenibacillus dendritiformis C454	prophage	linear	Cluster_489
Bacilli_gi_375287510	hallmark;refseq	81;67;4;10	Viruses;dsDNA viruses no RNA stage;Caudovirales;Siphoviridae;unknown;unknown	Bacteria;Firmicutes;Bacilli;Bacillales;Bacillaceae;Bacillus	Bacillus cereus NC7401	extrachromosomal	linear	Cluster_116
Bacilli_gi_376270191	hallmark;refseq	81;32;20;29	Viruses;dsDNA viruses no RNA stage;Caudovirales;Siphoviridae;unknown;unknown	Bacteria;Firmicutes;Bacilli;Bacillales;Bacillaceae;Bacillus	Bacillus cereus F837/76	extrachromosomal	linear	Cluster_268
Bacilli_gi_377556631	hallmark;refseq	41;28;3;10	Viruses;dsDNA viruses no RNA stage;Caudovirales;Siphoviridae;unknown;unknown	Bacteria;Firmicutes;Bacilli;Lactobacillales;Lactobacillaceae;Lactobacillus	Lactobacillus gastricus PS3	extrachromosomal	linear	Cluster_41
Bacilli_gi_377556685	hallmark;refseq	56;32;4;20	Viruses;dsDNA viruses no RNA stage;Caudovirales;Siphoviridae;unknown;unknown	Bacteria;Firmicutes;Bacilli;Lactobacillales;Lactobacillaceae;Lactobacillus	Lactobacillus gastricus PS3	extrachromosomal	linear	Cluster_32
Bacilli_gi_377832687	refseq	120;43;6;71	Viruses;dsDNA viruses no RNA stage;Caudovirales;Siphoviridae;unclassified;unclassified	Bacteria;Firmicutes;Bacilli;Lactobacillales;Lactobacillaceae;Lactobacillus	Lactobacillus mucosae LM1	extrachromosomal	linear	Cluster_89
Bacilli_gi_379019812-1533336-1577575	hallmark;refseq	75;73;1;1	Viruses;dsDNA viruses no RNA stage;Caudovirales;Siphoviridae;unknown;unknown	Bacteria;Firmicutes;Bacilli;Bacillales;Staphylococcaceae;Staphylococcus	Staphylococcus aureus subsp. aureus M013	prophage	linear	Cluster_8
Bacilli_gi_379704392-792400-832873	hallmark;refseq;vdb	59;39;4;16	Viruses;dsDNA viruses no RNA stage;Caudovirales;Siphoviridae;unclassified;unknown	Bacteria;Firmicutes;Bacilli;Lactobacillales;Streptococcaceae;Streptococcus	Streptococcus infantarius subsp. infantarius CJ18	prophage	linear	Cluster_41
Bacilli_gi_381181969	hallmark;refseq	57;33;7;17	Viruses;dsDNA viruses no RNA stage;Caudovirales;Siphoviridae;Phic3unalikevirus;unknown	Bacteria;Firmicutes;Bacilli;Bacillales;Listeriaceae;Listeria	Listeria fleischmannii subsp. coloradonensis	extrachromosomal	linear	Cluster_6
Bacilli_gi_383939350	hallmark;refseq	69;44;4;21	Viruses;dsDNA viruses no RNA stage;Caudovirales;Siphoviridae;unknown;unknown	Bacteria;Firmicutes;Bacilli;Lactobacillales;Streptococcaceae;Streptococcus	Streptococcus pseudopneumoniae SK674	extrachromosomal	circular	Cluster_30
Bacilli_gi_384162404-855932-891120	hallmark;refseq	48;30;5;13	Viruses;dsDNA viruses no RNA stage;Caudovirales;Siphoviridae;Lambdalikevirus;unknown	Bacteria;Firmicutes;Bacilli;Bacillales;Bacillaceae;Bacillus	Bacillus amyloliquefaciens LL3	prophage	linear	Cluster_6
Bacilli_gi_384177910-4724782-4761462	hallmark;refseq	54;42;3;9	Viruses;dsDNA viruses no RNA stage;Caudovirales;Siphoviridae;Phic3unalikevirus;unknown	Bacteria;Firmicutes;Bacilli;Bacillales;Bacillaceae;Bacillus	Bacillus thuringiensis serovar finitimus YBT-020	prophage	linear	Cluster_269
Bacilli_gi_384183548	hallmark	73;24;12;37	Viruses;dsDNA viruses no RNA stage;Caudovirales;unclassified;unclassified;unclassified	Bacteria;Firmicutes;Bacilli;Bacillales;Bacillaceae;Bacillus	Bacillus thuringiensis serovar chinensis CT-43	extrachromosomal	linear	Cluster_150
Bacilli_gi_384546269-1107905-1148300	hallmark;refseq	67;63;1;3	Viruses;dsDNA viruses no RNA stage;Caudovirales;Siphoviridae;unknown;unknown	Bacteria;Firmicutes;Bacilli;Bacillales;Staphylococcaceae;Staphylococcus	Staphylococcus aureus subsp. aureus ED133	prophage	linear	Cluster_8
Bacilli_gi_384548923-1513054-1559305	hallmark;refseq	67;64;2;1	Viruses;dsDNA viruses no RNA stage;Caudovirales;Siphoviridae;unclassified;unknown	Bacteria;Firmicutes;Bacilli;Bacillales;Staphylococcaceae;Staphylococcus	Staphylococcus aureus subsp. aureus JKD6159	prophage	linear	Cluster_6
Bacilli_gi_384860682-2119995-2157993	hallmark;refseq	57;53;4;	Viruses;dsDNA viruses no RNA stage;Caudovirales;Siphoviridae;unknown;unknown	Bacteria;Firmicutes;Bacilli;Bacillales;Staphylococcaceae;Staphylococcus	Staphylococcus aureus subsp. aureus str. JKD6008	prophage	linear	Cluster_40
Bacilli_gi_384865886-1745674-1793895	hallmark;refseq	64;62;1;1	Viruses;dsDNA viruses no RNA stage;Caudovirales;Siphoviridae;unclassified;unknown	Bacteria;Firmicutes;Bacilli;Bacillales;Staphylococcaceae;Staphylococcus	Staphylococcus aureus subsp. aureus TCH60	prophage	linear	Cluster_6
Bacilli_gi_385780298-1558909-1606496	hallmark;refseq	66;61;3;2	Viruses;dsDNA viruses no RNA stage;Caudovirales;Siphoviridae;unclassified;unknown	Bacteria;Firmicutes;Bacilli;Bacillales;Staphylococcaceae;Staphylococcus	Staphylococcus aureus subsp. aureus 11819-97	prophage	linear	Cluster_6
Bacilli_gi_385782956-887556-929686	hallmark;refseq	62;48;5;9	Viruses;dsDNA viruses no RNA stage;Caudovirales;Siphoviridae;unclassified;unknown	Bacteria;Firmicutes;Bacilli;Bacillales;Staphylococcaceae;Staphylococcus	Staphylococcus lugdunensis N920143	prophage	linear	Cluster_8
Bacilli_gi_385818534-1045559-1080296	hallmark;refseq	50;35;3;12	Viruses;dsDNA viruses no RNA stage;Caudovirales;Siphoviridae;unclassified;unknown	Bacteria;Firmicutes;Bacilli;Lactobacillales;Lactobacillaceae;Lactobacillus	Lactobacillus casei LC2W	prophage	linear	Cluster_363
Bacilli_gi_385821700-1035449-1070186	hallmark;refseq	50;35;3;12	Viruses;dsDNA viruses no RNA stage;Caudovirales;Siphoviridae;unclassified;unknown	Bacteria;Firmicutes;Bacilli;Lactobacillales;Lactobacillaceae;Lactobacillus	Lactobacillus casei BD-II	prophage	linear	Cluster_363
Bacilli_gi_385824947-839554-883014	hallmark;refseq	62;51;3;8	Viruses;dsDNA viruses no RNA stage;Caudovirales;Siphoviridae;unknown;unknown	Bacteria;Firmicutes;Bacilli;Lactobacillales;Lactobacillaceae;Lactobacillus	Lactobacillus johnsonii DPC 6026	prophage	linear	Cluster_157
Bacilli_gi_385836969-622724-662135	hallmark;refseq	59;49;5;5	Viruses;dsDNA viruses no RNA stage;Caudovirales;Siphoviridae;Lambdalikevirus;unknown	Bacteria;Firmicutes;Bacilli;Lactobacillales;Streptococcaceae;Lactococcus	Lactococcus lactis subsp. cremoris A76	prophage	linear	Cluster_159
Bacilli_gi_386006713-1224754-1268159	hallmark;refseq	69;56;4;9	Viruses;dsDNA viruses no RNA stage;Caudovirales;Siphoviridae;unclassified;unknown	Bacteria;Firmicutes;Bacilli;Bacillales;Listeriaceae;Listeria	Listeria monocytogenes L99	prophage	linear	Cluster_412
Bacilli_gi_386025288-1222710-1266118	hallmark;refseq	69;57;4;8	Viruses;dsDNA viruses no RNA stage;Caudovirales;Siphoviridae;unclassified;unknown	Bacteria;Firmicutes;Bacilli;Bacillales;Listeriaceae;Listeria	Listeria monocytogenes M7	prophage	linear	Cluster_412
Bacilli_gi_386045634-2359202-2401508	hallmark;refseq	68;50;10;8	Viruses;dsDNA viruses no RNA stage;Caudovirales;Siphoviridae;Lambdalikevirus;unknown	Bacteria;Firmicutes;Bacilli;Bacillales;Listeriaceae;Listeria	Listeria monocytogenes J0161	prophage	linear	Cluster_185
Bacilli_gi_386045634-2682391-2718615	hallmark;refseq;vdb	59;43;5;11	Viruses;dsDNA viruses no RNA stage;Caudovirales;Siphoviridae;unknown;unknown	Bacteria;Firmicutes;Bacilli;Bacillales;Listeriaceae;Listeria	Listeria monocytogenes J0161	prophage	linear	Cluster_94
Bacilli_gi_386361880-1133631-1157904	hallmark;refseq	37;35;1;1	Viruses;unclassified;unclassified;unclassified;unknown;unknown	Bacteria;Firmicutes;Bacilli;Lactobacillales;Streptococcaceae;Streptococcus	Streptococcus pyogenes Alab49	prophage	linear	Cluster_57
Bacilli_gi_386361880-967175-1012375	hallmark;refseq	65;48;7;10	Viruses;unclassified phages;;;unknown;unknown	Bacteria;Firmicutes;Bacilli;Lactobacillales;Streptococcaceae;Streptococcus	Streptococcus pyogenes Alab49	prophage	linear	Cluster_115
Bacilli_gi_387601291-1596549-1643210	hallmark;refseq	70;65;4;1	Viruses;dsDNA viruses no RNA stage;Caudovirales;Siphoviridae;unclassified;unknown	Bacteria;Firmicutes;Bacilli;Bacillales;Staphylococcaceae;Staphylococcus	Staphylococcus aureus subsp. aureus ST398	prophage	linear	Cluster_6
Bacilli_gi_387756560-23745-57287	hallmark;refseq;vdb	49;39;1;9	Viruses;dsDNA viruses no RNA stage;Caudovirales;Siphoviridae;unclassified;unknown	Bacteria;Firmicutes;Bacilli;Lactobacillales;Streptococcaceae;Streptococcus	Streptococcus pneumoniae OXC141	prophage	linear	Cluster_31
Bacilli_gi_389853198-779839-819962	hallmark;refseq	61;49;4;8	Viruses;dsDNA viruses no RNA stage;Caudovirales;Siphoviridae;unknown;unknown	Bacteria;Firmicutes;Bacilli;Lactobacillales;Streptococcaceae;Lactococcus	Lactococcus lactis subsp. cremoris NZ9000	prophage	linear	Cluster_195
Bacilli_gi_390630674	hallmark;refseq	76;33;4;39	Viruses;dsDNA viruses no RNA stage;Caudovirales;Siphoviridae;unknown;unknown	Bacteria;Firmicutes;Bacilli;Lactobacillales;Leuconostocaceae;Weissella	Weissella confusa LBAE C39-2	extrachromosomal	linear	Cluster_29
Bacilli_gi_390993670	hallmark;refseq	21;10;1;10	Viruses;dsDNA viruses no RNA stage;Caudovirales;Siphoviridae;unclassified;unknown	Bacteria;Firmicutes;Bacilli;Lactobacillales;Carnobacteriaceae;Carnobacterium	Carnobacterium maltaromaticum ATCC 35586	extrachromosomal	linear	Cluster_55
Bacilli_gi_390993716-246-13916	hallmark;refseq	16;13;1;2	Viruses;dsDNA viruses no RNA stage;Caudovirales;Myoviridae;unknown;unknown	Bacteria;Firmicutes;Bacilli;Lactobacillales;Carnobacteriaceae;Carnobacterium	Carnobacterium maltaromaticum ATCC 35586	prophage	linear	Cluster_15
Bacilli_gi_392971819-146829-199081	hallmark;refseq	64;33;5;26	Viruses;dsDNA viruses no RNA stage;Caudovirales;Siphoviridae;unknown;unknown	Bacteria;Firmicutes;Bacilli;Bacillales;Staphylococcaceae;Staphylococcus	Staphylococcus equorum subsp. equorum Mu2	prophage	linear	Cluster_8
Bacilli_gi_395238799	hallmark;refseq	28;17;;11	Viruses;dsDNA viruses no RNA stage;Caudovirales;Siphoviridae;Phic3unalikevirus;unknown	Bacteria;Firmicutes;Bacilli;Lactobacillales;Lactobacillaceae;Lactobacillus	Lactobacillus gigeriorum CRBIP 24.85	extrachromosomal	linear	Cluster_141
Bacilli_gi_395239076	hallmark;refseq	59;33;3;23	Viruses;dsDNA viruses no RNA stage;Caudovirales;Siphoviridae;unclassified;unknown	Bacteria;Firmicutes;Bacilli;Lactobacillales;Lactobacillaceae;Lactobacillus	Lactobacillus gigeriorum CRBIP 24.85	extrachromosomal	linear	Cluster_32
Bacilli_gi_395244000-0-26030	hallmark;refseq	40;26;;14	Viruses;dsDNA viruses no RNA stage;Caudovirales;unclassified;unclassified;unknown	Bacteria;Firmicutes;Bacilli;Lactobacillales;Lactobacillaceae;Lactobacillus	Lactobacillus hominis CRBIP 24.179	prophage	linear	Cluster_141
Bacilli_gi_397698583-257750-295157	hallmark;refseq	54;51;1;2	Viruses;dsDNA viruses no RNA stage;Caudovirales;Siphoviridae;unknown;unknown	Bacteria;Firmicutes;Bacilli;Lactobacillales;Enterococcaceae;Enterococcus	Enterococcus faecalis D32	prophage	linear	Cluster_17
Bacilli_gi_397738323	refseq	68;44;7;17	Viruses;dsDNA viruses no RNA stage;Caudovirales;Siphoviridae;Spbetalikevirus;unknown	Bacteria;Firmicutes;Bacilli;Bacillales;Bacillaceae;Bacillus	Bacillus vallismortis DV1-F-3	extrachromosomal	linear	Cluster_253
Bacilli_gi_397738354	hallmark;refseq	76;32;18;26	Viruses;dsDNA viruses no RNA stage;Caudovirales;unclassified;unclassified;unknown	Bacteria;Firmicutes;Bacilli;Bacillales;Bacillaceae;Bacillus	Bacillus vallismortis DV1-F-3	extrachromosomal	linear	Cluster_105
Bacilli_gi_397738363	refseq	41;31;2;8	Viruses;dsDNA viruses no RNA stage;Caudovirales;unclassified;unclassified;unknown	Bacteria;Firmicutes;Bacilli;Bacillales;Bacillaceae;Bacillus	Bacillus vallismortis DV1-F-3	extrachromosomal	linear	Cluster_253
Bacilli_gi_397738376	refseq	50;36;3;11	Viruses;dsDNA viruses no RNA stage;Caudovirales;Siphoviridae;unclassified;unclassified	Bacteria;Firmicutes;Bacilli;Bacillales;Bacillaceae;Bacillus	Bacillus vallismortis DV1-F-3	extrachromosomal	linear	Cluster_253
Bacilli_gi_399049503	refseq;vdb	18;4;3;11	Viruses;dsDNA viruses no RNA stage;Caudovirales;unclassified;unclassified;unknown	Bacteria;Firmicutes;Bacilli;Bacillales;Paenibacillaceae;Brevibacillus	Brevibacillus sp. CF112	extrachromosomal	linear	unclustered
Bacilli_gi_399051981	hallmark;noncaudo	30;10;2;18	Viruses;dsDNA viruses no RNA stage;unknown;Tectiviridae;Tectivirus;unknown	Bacteria;Firmicutes;Bacilli;Bacillales;Paenibacillaceae;Brevibacillus	Brevibacillus sp. CF112	extrachromosomal	linear	Cluster_125
Bacilli_gi_399053859	refseq	34;16;3;15	Viruses;dsDNA viruses no RNA stage;Caudovirales;Siphoviridae;unknown;unknown	Bacteria;Firmicutes;Bacilli;Bacillales;Paenibacillaceae;Brevibacillus	Brevibacillus sp. CF112	extrachromosomal	linear	Cluster_308
Bacilli_gi_399056144	hallmark	39;6;12;21	Viruses;dsDNA viruses no RNA stage;Caudovirales;Siphoviridae;Lambdalikevirus;unknown	Bacteria;Firmicutes;Bacilli;Bacillales;Paenibacillaceae;Brevibacillus	Brevibacillus sp. CF112	extrachromosomal	linear	Cluster_72
Bacilli_gi_399516719	hallmark;refseq	47;27;4;16	Viruses;dsDNA viruses no RNA stage;Caudovirales;Siphoviridae;unknown;unknown	Bacteria;Firmicutes;Bacilli;Lactobacillales;Leuconostocaceae;Leuconostoc	Leuconostoc pseudomesenteroides 4882	extrachromosomal	linear	Cluster_41
Bacilli_gi_399579775	refseq	13;7;3;3	Viruses;dsDNA viruses no RNA stage;Caudovirales;Myoviridae;T4likevirus;unknown	Bacteria;Firmicutes;Bacilli;Bacillales;Sporolactobacillaceae;Sporolactobacillus	Sporolactobacillus vineae DSM 21990 = SL153	extrachromosomal	linear	Cluster_564
Bacilli_gi_402297927-7125-46941	hallmark;refseq	55;24;9;22	Viruses;dsDNA viruses no RNA stage;Caudovirales;unclassified;unclassified;unknown	Bacteria;Firmicutes;Bacilli;Bacillales;Bacillaceae;Bacillus	Bacillus alcalophilus ATCC 27647	prophage	linear	Cluster_67
Bacilli_gi_402558249-34571-69901	hallmark;refseq	55;23;7;25	Viruses;dsDNA viruses no RNA stage;Caudovirales;Myoviridae;Punalikevirus;unknown	Bacteria;Firmicutes;Bacilli;Bacillales;Bacillaceae;Bacillus	Bacillus thuringiensis HD-771	prophage	linear	Cluster_150
Bacilli_gi_402558574	hallmark;refseq	64;42;3;19	Viruses;dsDNA viruses no RNA stage;Caudovirales;Siphoviridae;unknown;unknown	Bacteria;Firmicutes;Bacilli;Bacillales;Bacillaceae;Bacillus	Bacillus thuringiensis HD-771	extrachromosomal	linear	Cluster_186
Bacilli_gi_402558824-1373424-1415725	hallmark;refseq;vdb	60;39;10;11	Viruses;dsDNA viruses no RNA stage;Caudovirales;Siphoviridae;unknown;unknown	Bacteria;Firmicutes;Bacilli;Bacillales;Bacillaceae;Bacillus	Bacillus thuringiensis HD-771	prophage	linear	Cluster_55
Bacilli_gi_402818618-33898-50880	hallmark;refseq	25;16;1;8	Viruses;dsDNA viruses no RNA stage;Caudovirales;Siphoviridae;unclassified;unknown	Bacteria;Firmicutes;Bacilli;Bacillales;Paenibacillaceae;Paenibacillus	Paenibacillus alvei DSM 29	prophage	linear	Cluster_50
Bacilli_gi_402818618-58-33202	hallmark;refseq	59;27;4;28	Viruses;dsDNA viruses no RNA stage;Caudovirales;Siphoviridae;unknown;unknown	Bacteria;Firmicutes;Bacilli;Bacillales;Paenibacillaceae;Paenibacillus	Paenibacillus alvei DSM 29	prophage	linear	Cluster_30
Bacilli_gi_403048122	hallmark;refseq;vdb	51;13;21;17	Viruses;dsDNA viruses no RNA stage;Caudovirales;Myoviridae;unknown;unknown	Bacteria;Firmicutes;Bacilli;Bacillales;Paenibacillaceae;Paenibacillus	Paenibacillus senegalensis JC66	extrachromosomal	linear	Cluster_15
Bacilli_gi_403048418	hallmark	13;2;3;8	Viruses;dsDNA viruses no RNA stage;Caudovirales;Siphoviridae;Lambdalikevirus;unknown	Bacteria;Firmicutes;Bacilli;Bacillales;Planococcaceae;Kurthia	Kurthia massiliensis	extrachromosomal	linear	Cluster_333
Bacilli_gi_403048419	hallmark	16;2;2;12	Viruses;dsDNA viruses no RNA stage;Caudovirales;Siphoviridae;Lambdalikevirus;unknown	Bacteria;Firmicutes;Bacilli;Bacillales;Planococcaceae;Kurthia	Kurthia massiliensis	extrachromosomal	linear	Cluster_333
Bacilli_gi_403048714	hallmark	17;6;1;10	Viruses;dsDNA viruses no RNA stage;Caudovirales;Siphoviridae;Lambdalikevirus;unknown	Bacteria;Firmicutes;Bacilli;Bacillales;Planococcaceae;Kurthia	Kurthia sp. JC8E	extrachromosomal	linear	Cluster_138
Bacilli_gi_404282430-1244247-1287027	hallmark;refseq	69;48;4;17	Viruses;dsDNA viruses no RNA stage;Caudovirales;Siphoviridae;unclassified;unknown	Bacteria;Firmicutes;Bacilli;Bacillales;Listeriaceae;Listeria	Listeria monocytogenes SLCC2372	prophage	linear	Cluster_162
Bacilli_gi_405756987-1244070-1286688	hallmark;refseq	67;47;3;17	Viruses;dsDNA viruses no RNA stage;Caudovirales;Siphoviridae;unclassified;unknown	Bacteria;Firmicutes;Bacilli;Bacillales;Listeriaceae;Listeria	Listeria monocytogenes SLCC2479	prophage	linear	Cluster_162
Bacilli_gi_406578771	hallmark;refseq	14;10;2;2	Viruses;dsDNA viruses no RNA stage;Caudovirales;Siphoviridae;Lambdalikevirus;unknown	Bacteria;Firmicutes;Bacilli;Lactobacillales;Streptococcaceae;Streptococcus	Streptococcus sp. GMD6S	extrachromosomal	linear	Cluster_20
Bacilli_gi_406580233	hallmark;refseq	31;18;8;5	Viruses;dsDNA viruses no RNA stage;Caudovirales;Siphoviridae;unknown;unknown	Bacteria;Firmicutes;Bacilli;Lactobacillales;Enterococcaceae;Enterococcus	Enterococcus sp. GMD4E	extrachromosomal	linear	Cluster_90
Bacilli_gi_406584727	hallmark;refseq	31;18;8;5	Viruses;dsDNA viruses no RNA stage;Caudovirales;Siphoviridae;unknown;unknown	Bacteria;Firmicutes;Bacilli;Lactobacillales;Enterococcaceae;Enterococcus	Enterococcus sp. GMD2E	extrachromosomal	linear	Cluster_90
Bacilli_gi_406588330	hallmark;refseq;vdb	45;24;10;11	Viruses;dsDNA viruses no RNA stage;Caudovirales;Siphoviridae;unknown;unknown	Bacteria;Firmicutes;Bacilli;Lactobacillales;Streptococcaceae;Streptococcus	Streptococcus sp. GMD1S	extrachromosomal	linear	Cluster_20
Bacilli_gi_406589702	hallmark;refseq	24;16;4;4	Viruses;dsDNA viruses no RNA stage;Caudovirales;Siphoviridae;unknown;unknown	Bacteria;Firmicutes;Bacilli;Lactobacillales;Enterococcaceae;Enterococcus	Enterococcus sp. GMD1E	extrachromosomal	linear	Cluster_90
Bacilli_gi_407708681	hallmark;refseq	75;27;6;42	Viruses;dsDNA viruses no RNA stage;Caudovirales;Siphoviridae;unclassified;unknown	Bacteria;Firmicutes;Bacilli;Bacillales;Bacillaceae;Bacillus	Bacillus thuringiensis MC28	extrachromosomal	linear	Cluster_150
Bacilli_gi_407979928	hallmark	46;13;3;30	Viruses;dsDNA viruses no RNA stage;Caudovirales;Siphoviridae;Spbetalikevirus;unknown	Bacteria;Firmicutes;Bacilli;Bacillales;Bacillaceae;Bacillus	Bacillus sp. HYC-10	extrachromosomal	linear	Cluster_167
Bacilli_gi_407980662	refseq	41;16;5;20	Viruses;dsDNA viruses no RNA stage;Caudovirales;Siphoviridae;unknown;unknown	Bacteria;Firmicutes;Bacilli;Bacillales;Bacillaceae;Bacillus	Bacillus sp. HYC-10	extrachromosomal	linear	Cluster_105
Bacilli_gi_407980902	hallmark;refseq	17;10;7;	Viruses;dsDNA viruses no RNA stage;Caudovirales;unclassified;unclassified;unknown	Bacteria;Firmicutes;Bacilli;Bacillales;Bacillaceae;Bacillus	Bacillus sp. HYC-10	extrachromosomal	linear	Cluster_105
Bacilli_gi_407980970	hallmark	21;6;8;7	Viruses;dsDNA viruses no RNA stage;Caudovirales;unclassified;unclassified;unknown	Bacteria;Firmicutes;Bacilli;Bacillales;Bacillaceae;Bacillus	Bacillus sp. HYC-10	extrachromosomal	linear	Cluster_105
Bacilli_gi_407981060	hallmark	18;9;7;2	Viruses;dsDNA viruses no RNA stage;Caudovirales;unclassified;unclassified;unknown	Bacteria;Firmicutes;Bacilli;Bacillales;Bacillaceae;Bacillus	Bacillus sp. HYC-10	extrachromosomal	linear	Cluster_105
Bacilli_gi_408784815	hallmark;refseq	45;21;7;17	Viruses;dsDNA viruses no RNA stage;Caudovirales;Siphoviridae;unclassified;unknown	Bacteria;Firmicutes;Bacilli;Lactobacillales;Aerococcaceae;Facklamia	Facklamia ignava CCUG 37419	extrachromosomal	linear	Cluster_20
Bacilli_gi_409913960-1385758-1426006	hallmark;refseq	51;46;;5	Viruses;unclassified;unclassified;unclassified;unknown;unknown	Bacteria;Firmicutes;Bacilli;Lactobacillales;Streptococcaceae;Streptococcus	Streptococcus pyogenes A20	prophage	linear	Cluster_70
Bacilli_gi_409913960-982600-1020388	hallmark;refseq	60;50;4;6	Viruses;dsDNA viruses no RNA stage;Caudovirales;Siphoviridae;unclassified;unknown	Bacteria;Firmicutes;Bacilli;Lactobacillales;Streptococcaceae;Streptococcus	Streptococcus pyogenes A20	prophage	linear	Cluster_196
Bacilli_gi_409995665-1041799-1076533	hallmark;refseq	50;35;3;12	Viruses;dsDNA viruses no RNA stage;Caudovirales;Siphoviridae;unclassified;unknown	Bacteria;Firmicutes;Bacilli;Lactobacillales;Lactobacillaceae;Lactobacillus	Lactobacillus casei W56	prophage	linear	Cluster_363
Bacilli_gi_410475457-24324-60929	hallmark;refseq	60;47;4;9	Viruses;dsDNA viruses no RNA stage;Caudovirales;Siphoviridae;unclassified;unknown	Bacteria;Firmicutes;Bacilli;Lactobacillales;Streptococcaceae;Streptococcus	Streptococcus pneumoniae gamPNI0373	prophage	linear	Cluster_31
Bacilli_gi_411107839	hallmark;refseq	69;36;11;22	Viruses;dsDNA viruses no RNA stage;Caudovirales;Siphoviridae;unclassified;unknown	Bacteria;Firmicutes;Bacilli;Lactobacillales;Streptococcaceae;Lactococcus	Lactococcus raffinolactis 4877	extrachromosomal	linear	Cluster_41
Bacilli_gi_415687370-0-41667	hallmark;refseq	56;53;2;1	Viruses;dsDNA viruses no RNA stage;Caudovirales;Siphoviridae;unclassified;unknown	Bacteria;Firmicutes;Bacilli;Bacillales;Staphylococcaceae;Staphylococcus	Staphylococcus aureus subsp. aureus CGS01	prophage	linear	Cluster_6
Bacilli_gi_415694657	hallmark;refseq	35;32;2;1	Viruses;dsDNA viruses no RNA stage;Caudovirales;Siphoviridae;unclassified;unknown	Bacteria;Firmicutes;Bacilli;Bacillales;Staphylococcaceae;Staphylococcus	Staphylococcus aureus subsp. aureus CGS03	extrachromosomal	linear	Cluster_6
Bacilli_gi_415694867	refseq	26;24;2;	Viruses;dsDNA viruses no RNA stage;Caudovirales;Siphoviridae;unknown;unknown	Bacteria;Firmicutes;Bacilli;Bacillales;Staphylococcaceae;Staphylococcus	Staphylococcus aureus subsp. aureus CGS03	extrachromosomal	linear	Cluster_6
Bacilli_gi_415699875	hallmark;refseq	53;51;2;	Viruses;dsDNA viruses no RNA stage;Caudovirales;Siphoviridae;unclassified;unknown	Bacteria;Firmicutes;Bacilli;Lactobacillales;Streptococcaceae;Streptococcus	Streptococcus pneumoniae 459-5	extrachromosomal	linear	Cluster_52
Bacilli_gi_415890624	hallmark;refseq	22;19;;3	Viruses;dsDNA viruses no RNA stage;Caudovirales;Siphoviridae;Lambdalikevirus;unknown	Bacteria;Firmicutes;Bacilli;Lactobacillales;Enterococcaceae;Enterococcus	Enterococcus faecium E4453	extrachromosomal	linear	Cluster_41
Bacilli_gi_415891593	hallmark;refseq	22;16;1;5	Viruses;dsDNA viruses no RNA stage;Caudovirales;Siphoviridae;unknown;unknown	Bacteria;Firmicutes;Bacilli;Lactobacillales;Enterococcaceae;Enterococcus	Enterococcus faecium E4453	extrachromosomal	linear	Cluster_119
Bacilli_gi_416127188	hallmark;refseq	29;22;;7	Viruses;dsDNA viruses no RNA stage;Caudovirales;Siphoviridae;Lambdalikevirus;unknown	Bacteria;Firmicutes;Bacilli;Bacillales;Staphylococcaceae;Staphylococcus	Staphylococcus epidermidis FRI909	extrachromosomal	linear	Cluster_6
Bacilli_gi_416143743	hallmark;refseq	59;32;6;21	Viruses;dsDNA viruses no RNA stage;Caudovirales;Siphoviridae;Lambdalikevirus;unknown	Bacteria;Firmicutes;Bacilli;Lactobacillales;Enterococcaceae;Enterococcus	Enterococcus faecium E4452	extrachromosomal	linear	Cluster_41
Bacilli_gi_416841886-0-27167	hallmark;refseq	33;33;;	Viruses;dsDNA viruses no RNA stage;Caudovirales;Siphoviridae;unknown;unknown	Bacteria;Firmicutes;Bacilli;Bacillales;Staphylococcaceae;Staphylococcus	Staphylococcus aureus O11	prophage	linear	Cluster_56
Bacilli_gi_416847937	hallmark;refseq	40;39;1;	Viruses;dsDNA viruses no RNA stage;Caudovirales;Siphoviridae;unclassified;unknown	Bacteria;Firmicutes;Bacilli;Bacillales;Staphylococcaceae;Staphylococcus	Staphylococcus aureus O46	extrachromosomal	linear	Cluster_49
Bacilli_gi_416848126	hallmark;refseq	46;45;;1	Viruses;dsDNA viruses no RNA stage;Caudovirales;Siphoviridae;unknown;unknown	Bacteria;Firmicutes;Bacilli;Bacillales;Staphylococcaceae;Staphylococcus	Staphylococcus aureus O46	extrachromosomal	linear	Cluster_8
Bacilli_gi_417090946	hallmark;refseq	62;36;6;20	Viruses;dsDNA viruses no RNA stage;Caudovirales;Siphoviridae;unclassified;unknown	Bacteria;Firmicutes;Bacilli;Lactobacillales;Streptococcaceae;Streptococcus	Streptococcus suis R61	extrachromosomal	linear	Cluster_50
Bacilli_gi_417646485-34936-72606	hallmark;refseq	56;49;2;5	Viruses;dsDNA viruses no RNA stage;Caudovirales;Siphoviridae;unknown;unknown	Bacteria;Firmicutes;Bacilli;Bacillales;Staphylococcaceae;Staphylococcus	Staphylococcus epidermidis VCU144	prophage	linear	Cluster_8
Bacilli_gi_417648795	hallmark;refseq	20;19;1;	Viruses;dsDNA viruses no RNA stage;Caudovirales;Siphoviridae;unclassified;unknown	Bacteria;Firmicutes;Bacilli;Bacillales;Staphylococcaceae;Staphylococcus	Staphylococcus aureus subsp. aureus 21189	extrachromosomal	linear	Cluster_6
Bacilli_gi_417650146	refseq	25;23;2;	Viruses;dsDNA viruses no RNA stage;Caudovirales;Siphoviridae;unknown;unknown	Bacteria;Firmicutes;Bacilli;Bacillales;Staphylococcaceae;Staphylococcus	Staphylococcus aureus subsp. aureus 21189	extrachromosomal	linear	Cluster_6
Bacilli_gi_417650690	hallmark;refseq	66;63;2;1	Viruses;dsDNA viruses no RNA stage;Caudovirales;Siphoviridae;unknown;unknown	Bacteria;Firmicutes;Bacilli;Bacillales;Staphylococcaceae;Staphylococcus	Staphylococcus aureus subsp. aureus 21172	extrachromosomal	linear	Cluster_40
Bacilli_gi_417654534	hallmark;refseq	68;64;3;1	Viruses;dsDNA viruses no RNA stage;Caudovirales;Siphoviridae;unclassified;unknown	Bacteria;Firmicutes;Bacilli;Bacillales;Staphylococcaceae;Staphylococcus	Staphylococcus aureus subsp. aureus 21193	extrachromosomal	linear	Cluster_6
Bacilli_gi_417656941	hallmark;refseq	40;37;1;2	Viruses;dsDNA viruses no RNA stage;Caudovirales;Siphoviridae;unclassified;unknown	Bacteria;Firmicutes;Bacilli;Bacillales;Staphylococcaceae;Staphylococcus	Staphylococcus epidermidis VCU028	extrachromosomal	linear	Cluster_8
Bacilli_gi_417659246	hallmark;refseq	73;64;4;5	Viruses;dsDNA viruses no RNA stage;Caudovirales;Siphoviridae;unclassified;unclassified	Bacteria;Firmicutes;Bacilli;Bacillales;Staphylococcaceae;Staphylococcus	Staphylococcus epidermidis VCU045	extrachromosomal	linear	Cluster_8
Bacilli_gi_417695265	refseq	22;15;3;4	Viruses;dsDNA viruses no RNA stage;Caudovirales;Siphoviridae;unknown;unknown	Bacteria;Firmicutes;Bacilli;Lactobacillales;Streptococcaceae;Streptococcus	Streptococcus pneumoniae GA47368	extrachromosomal	linear	Cluster_30
Bacilli_gi_417751809	hallmark;refseq	20;13;5;2	Viruses;dsDNA viruses no RNA stage;Caudovirales;Siphoviridae;unclassified;unknown	Bacteria;Firmicutes;Bacilli;Lactobacillales;Streptococcaceae;Streptococcus	Streptococcus dysgalactiae subsp. equisimilis SK1249	extrachromosomal	linear	Cluster_20
Bacilli_gi_417751967	hallmark;refseq	27;25;1;1	Viruses;unclassified;unclassified;unclassified;unknown;unknown	Bacteria;Firmicutes;Bacilli;Lactobacillales;Streptococcaceae;Streptococcus	Streptococcus dysgalactiae subsp. equisimilis SK1249	extrachromosomal	linear	Cluster_68
Bacilli_gi_417752159-1026-28537	hallmark;refseq	38;32;3;3	Viruses;dsDNA viruses no RNA stage;Caudovirales;Siphoviridae;unclassified;unknown	Bacteria;Firmicutes;Bacilli;Lactobacillales;Streptococcaceae;Streptococcus	Streptococcus dysgalactiae subsp. equisimilis SK1249	prophage	linear	Cluster_17
Bacilli_gi_417752720	hallmark;refseq	46;30;1;15	Viruses;dsDNA viruses no RNA stage;Caudovirales;Siphoviridae;unclassified;unknown	Bacteria;Firmicutes;Bacilli;Lactobacillales;Streptococcaceae;Streptococcus	Streptococcus dysgalactiae subsp. equisimilis SK1249	extrachromosomal	linear	Cluster_30
Bacilli_gi_417753211-9810-41935	hallmark;refseq	50;43;2;5	Viruses;dsDNA viruses no RNA stage;Caudovirales;Siphoviridae;unknown;unknown	Bacteria;Firmicutes;Bacilli;Lactobacillales;Streptococcaceae;Streptococcus	Streptococcus dysgalactiae subsp. equisimilis SK1249	prophage	linear	Cluster_52
Bacilli_gi_417797297-90004-137007	hallmark;refseq	67;65;2;	Viruses;dsDNA viruses no RNA stage;Caudovirales;Siphoviridae;unclassified;unknown	Bacteria;Firmicutes;Bacilli;Bacillales;Staphylococcaceae;Staphylococcus	Staphylococcus aureus subsp. aureus 21305	prophage	linear	Cluster_6
Bacilli_gi_417798346	hallmark;refseq	32;31;1;	Viruses;dsDNA viruses no RNA stage;Caudovirales;Siphoviridae;unclassified;unknown	Bacteria;Firmicutes;Bacilli;Bacillales;Staphylococcaceae;Staphylococcus	Staphylococcus aureus subsp. aureus 21310	extrachromosomal	linear	Cluster_35
Bacilli_gi_417798378	hallmark;refseq	22;21;1;	Viruses;dsDNA viruses no RNA stage;Caudovirales;Siphoviridae;Lambdalikevirus;unknown	Bacteria;Firmicutes;Bacilli;Bacillales;Staphylococcaceae;Staphylococcus	Staphylococcus aureus subsp. aureus 21310	extrachromosomal	linear	Cluster_56
Bacilli_gi_417798765	hallmark;refseq	36;34;2;	Viruses;dsDNA viruses no RNA stage;Caudovirales;Siphoviridae;unclassified;unknown	Bacteria;Firmicutes;Bacilli;Bacillales;Staphylococcaceae;Staphylococcus	Staphylococcus aureus subsp. aureus 21310	extrachromosomal	linear	Cluster_40
Bacilli_gi_417855870-1158916-1200081	hallmark;refseq	58;43;7;8	Viruses;unclassified;unclassified;unclassified;unknown;unknown	Bacteria;Firmicutes;Bacilli;Lactobacillales;Streptococcaceae;Streptococcus	Streptococcus pyogenes HKU QMH11M0907901	prophage	linear	Cluster_115
Bacilli_gi_417855870-489312-530530	hallmark;refseq	52;46;1;5	Viruses;unclassified;unclassified;unclassified;unknown;unknown	Bacteria;Firmicutes;Bacilli;Lactobacillales;Streptococcaceae;Streptococcus	Streptococcus pyogenes HKU QMH11M0907901	prophage	linear	Cluster_70
Bacilli_gi_417888570	hallmark;refseq	21;21;;	Viruses;dsDNA viruses no RNA stage;Caudovirales;Siphoviridae;unclassified;unknown	Bacteria;Firmicutes;Bacilli;Bacillales;Staphylococcaceae;Staphylococcus	Staphylococcus aureus subsp. aureus 21195	extrachromosomal	linear	Cluster_40
Bacilli_gi_417889221	hallmark;refseq	19;19;;	Viruses;dsDNA viruses no RNA stage;Caudovirales;Siphoviridae;Lambdalikevirus;unknown	Bacteria;Firmicutes;Bacilli;Bacillales;Staphylococcaceae;Staphylococcus	Staphylococcus aureus subsp. aureus 21195	extrachromosomal	linear	Cluster_56
Bacilli_gi_417889241	hallmark;refseq	31;31;;	Viruses;dsDNA viruses no RNA stage;Caudovirales;Siphoviridae;unclassified;unknown	Bacteria;Firmicutes;Bacilli;Bacillales;Staphylococcaceae;Staphylococcus	Staphylococcus aureus subsp. aureus 21195	extrachromosomal	linear	Cluster_49
Bacilli_gi_417894173-0-39497	hallmark;refseq	59;55;4;	Viruses;dsDNA viruses no RNA stage;Caudovirales;Siphoviridae;unclassified;unknown	Bacteria;Firmicutes;Bacilli;Bacillales;Staphylococcaceae;Staphylococcus	Staphylococcus aureus subsp. aureus 21201	prophage	linear	Cluster_8
Bacilli_gi_417894420-150-38144	hallmark;refseq	65;60;4;1	Viruses;dsDNA viruses no RNA stage;Caudovirales;Siphoviridae;unknown;unknown	Bacteria;Firmicutes;Bacilli;Bacillales;Staphylococcaceae;Staphylococcus	Staphylococcus aureus subsp. aureus 21201	prophage	linear	Cluster_8
Bacilli_gi_417896179	hallmark;refseq	17;17;;	Viruses;dsDNA viruses no RNA stage;Caudovirales;Siphoviridae;unclassified;unknown	Bacteria;Firmicutes;Bacilli;Bacillales;Staphylococcaceae;Staphylococcus	Staphylococcus aureus subsp. aureus 21235	extrachromosomal	linear	Cluster_40
Bacilli_gi_417896295	hallmark;refseq	57;55;2;	Viruses;dsDNA viruses no RNA stage;Caudovirales;Siphoviridae;unclassified;unknown	Bacteria;Firmicutes;Bacilli;Bacillales;Staphylococcaceae;Staphylococcus	Staphylococcus aureus subsp. aureus 21235	extrachromosomal	linear	Cluster_8
Bacilli_gi_417897394	refseq	36;31;3;2	Viruses;dsDNA viruses no RNA stage;Caudovirales;Siphoviridae;unknown;unknown	Bacteria;Firmicutes;Bacilli;Bacillales;Staphylococcaceae;Staphylococcus	Staphylococcus aureus subsp. aureus 21235	extrachromosomal	linear	Cluster_8
Bacilli_gi_417904279	hallmark;refseq	36;36;;	Viruses;dsDNA viruses no RNA stage;Caudovirales;Siphoviridae;unclassified;unknown	Bacteria;Firmicutes;Bacilli;Bacillales;Staphylococcaceae;Staphylococcus	Staphylococcus aureus subsp. aureus 21269	extrachromosomal	linear	Cluster_49
Bacilli_gi_417906544	hallmark;refseq	51;46;3;2	Viruses;dsDNA viruses no RNA stage;Caudovirales;Siphoviridae;unknown;unknown	Bacteria;Firmicutes;Bacilli;Bacillales;Staphylococcaceae;Staphylococcus	Staphylococcus capitis VCU116	extrachromosomal	linear	Cluster_40
Bacilli_gi_417935460-55324-90986	hallmark;refseq	55;36;3;16	Viruses;dsDNA viruses no RNA stage;Caudovirales;Siphoviridae;unknown;unknown	Bacteria;Firmicutes;Bacilli;Lactobacillales;Streptococcaceae;Streptococcus	Streptococcus infantis X	prophage	linear	Cluster_50
Bacilli_gi_417939277-5553-40816	hallmark;refseq	55;39;4;12	Viruses;dsDNA viruses no RNA stage;Caudovirales;Siphoviridae;C2likevirus;unknown	Bacteria;Firmicutes;Bacilli;Lactobacillales;Streptococcaceae;Streptococcus	Streptococcus infantis SK970	prophage	linear	Cluster_166
Bacilli_gi_417972469-10649-37669	hallmark;refseq	41;31;1;9	Viruses;dsDNA viruses no RNA stage;Caudovirales;Siphoviridae;unknown;unknown	Bacteria;Firmicutes;Bacilli;Lactobacillales;Lactobacillaceae;Lactobacillus	Lactobacillus ruminis ATCC 25644	prophage	linear	Cluster_57
Bacilli_gi_417973945-7683-39121	hallmark;refseq	39;26;2;11	Viruses;dsDNA viruses no RNA stage;Caudovirales;Siphoviridae;unclassified;unknown	Bacteria;Firmicutes;Bacilli;Lactobacillales;Lactobacillaceae;Lactobacillus	Lactobacillus ruminis ATCC 25644	prophage	linear	Cluster_399
Bacilli_gi_417985231	hallmark;refseq	48;39;;9	Viruses;dsDNA viruses no RNA stage;Caudovirales;Siphoviridae;unclassified;unknown	Bacteria;Firmicutes;Bacilli;Lactobacillales;Lactobacillaceae;Lactobacillus	Lactobacillus casei 21/1	extrachromosomal	linear	Cluster_30
Bacilli_gi_417986406-23033-40274	refseq	36;20;4;12	Viruses;dsDNA viruses no RNA stage;Caudovirales;Siphoviridae;unknown;unknown	Bacteria;Firmicutes;Bacilli;Lactobacillales;Lactobacillaceae;Lactobacillus	Lactobacillus casei 32G	prophage	linear	Cluster_96
Bacilli_gi_417986451	hallmark;refseq	23;19;;4	Viruses;dsDNA viruses no RNA stage;Caudovirales;Siphoviridae;unknown;unknown	Bacteria;Firmicutes;Bacilli;Lactobacillales;Lactobacillaceae;Lactobacillus	Lactobacillus casei 32G	extrachromosomal	linear	Cluster_30
Bacilli_gi_417987164	hallmark;refseq	21;19;;2	Viruses;dsDNA viruses no RNA stage;Caudovirales;Siphoviridae;unknown;unknown	Bacteria;Firmicutes;Bacilli;Lactobacillales;Lactobacillaceae;Lactobacillus	Lactobacillus casei 32G	extrachromosomal	linear	Cluster_96
Bacilli_gi_417987185	refseq	39;26;3;10	Viruses;dsDNA viruses no RNA stage;Caudovirales;Siphoviridae;Phic3unalikevirus;unknown	Bacteria;Firmicutes;Bacilli;Lactobacillales;Lactobacillaceae;Lactobacillus	Lactobacillus casei 32G	extrachromosomal	linear	Cluster_133
Bacilli_gi_417989998-17497-39738	hallmark;refseq	23;17;;6	Viruses;dsDNA viruses no RNA stage;Caudovirales;Siphoviridae;unknown;unknown	Bacteria;Firmicutes;Bacilli;Lactobacillales;Lactobacillaceae;Lactobacillus	Lactobacillus casei A2-362	prophage	linear	Cluster_32
Bacilli_gi_417991325	hallmark;refseq	22;15;1;6	Viruses;dsDNA viruses no RNA stage;Caudovirales;Siphoviridae;unknown;unknown	Bacteria;Firmicutes;Bacilli;Lactobacillales;Lactobacillaceae;Lactobacillus	Lactobacillus casei A2-362	extrachromosomal	linear	Cluster_96
Bacilli_gi_417991437	hallmark;refseq	20;18;1;1	Viruses;dsDNA viruses no RNA stage;Caudovirales;Siphoviridae;unclassified;unknown	Bacteria;Firmicutes;Bacilli;Lactobacillales;Lactobacillaceae;Lactobacillus	Lactobacillus casei A2-362	extrachromosomal	linear	Cluster_161
Bacilli_gi_417991492	refseq	28;14;3;11	Viruses;dsDNA viruses no RNA stage;Caudovirales;Siphoviridae;unknown;unknown	Bacteria;Firmicutes;Bacilli;Lactobacillales;Lactobacillaceae;Lactobacillus	Lactobacillus casei A2-362	extrachromosomal	linear	Cluster_133
Bacilli_gi_417991541	hallmark;refseq	23;19;;4	Viruses;dsDNA viruses no RNA stage;Caudovirales;Siphoviridae;unknown;unknown	Bacteria;Firmicutes;Bacilli;Lactobacillales;Lactobacillaceae;Lactobacillus	Lactobacillus casei A2-362	extrachromosomal	linear	Cluster_30
Bacilli_gi_417991583	hallmark;refseq	17;15;1;1	Viruses;dsDNA viruses no RNA stage;Caudovirales;Siphoviridae;unknown;unknown	Bacteria;Firmicutes;Bacilli;Lactobacillales;Lactobacillaceae;Lactobacillus	Lactobacillus casei A2-362	extrachromosomal	linear	Cluster_41
Bacilli_gi_417991622	refseq	29;12;3;14	Viruses;dsDNA viruses no RNA stage;Caudovirales;Siphoviridae;unknown;unknown	Bacteria;Firmicutes;Bacilli;Lactobacillales;Lactobacillaceae;Lactobacillus	Lactobacillus casei A2-362	extrachromosomal	linear	Cluster_96
Bacilli_gi_417995207	refseq	30;15;3;12	Viruses;dsDNA viruses no RNA stage;Caudovirales;Siphoviridae;unknown;unknown	Bacteria;Firmicutes;Bacilli;Lactobacillales;Lactobacillaceae;Lactobacillus	Lactobacillus casei M36	extrachromosomal	linear	Cluster_420
Bacilli_gi_418001443	refseq	30;21;1;8	Viruses;dsDNA viruses no RNA stage;Caudovirales;Siphoviridae;Phic3unalikevirus;unknown	Bacteria;Firmicutes;Bacilli;Lactobacillales;Lactobacillaceae;Lactobacillus	Lactobacillus casei UCD174	extrachromosomal	linear	Cluster_133
Bacilli_gi_418002585	hallmark;refseq	25;21;;4	Viruses;dsDNA viruses no RNA stage;Caudovirales;Siphoviridae;unclassified;unknown	Bacteria;Firmicutes;Bacilli;Lactobacillales;Lactobacillaceae;Lactobacillus	Lactobacillus casei UCD174	extrachromosomal	linear	Cluster_161
Bacilli_gi_418002624	hallmark;refseq	26;19;3;4	Viruses;dsDNA viruses no RNA stage;Caudovirales;Siphoviridae;unknown;unknown	Bacteria;Firmicutes;Bacilli;Lactobacillales;Lactobacillaceae;Lactobacillus	Lactobacillus casei UCD174	extrachromosomal	linear	Cluster_41
Bacilli_gi_418002652	hallmark;refseq	24;19;1;4	Viruses;dsDNA viruses no RNA stage;Caudovirales;Siphoviridae;unknown;unknown	Bacteria;Firmicutes;Bacilli;Lactobacillales;Lactobacillaceae;Lactobacillus	Lactobacillus casei UCD174	extrachromosomal	linear	Cluster_133
Bacilli_gi_418002674	hallmark;refseq	37;35;;2	Viruses;dsDNA viruses no RNA stage;Caudovirales;Siphoviridae;unclassified;unknown	Bacteria;Firmicutes;Bacilli;Lactobacillales;Lactobacillaceae;Lactobacillus	Lactobacillus casei UCD174	extrachromosomal	linear	Cluster_127
Bacilli_gi_418002709	refseq	21;14;2;5	Viruses;dsDNA viruses no RNA stage;Caudovirales;Siphoviridae;unknown;unknown	Bacteria;Firmicutes;Bacilli;Lactobacillales;Lactobacillaceae;Lactobacillus	Lactobacillus casei UCD174	extrachromosomal	linear	Cluster_96
Bacilli_gi_418004195	refseq	24;15;4;5	Viruses;dsDNA viruses no RNA stage;Caudovirales;Siphoviridae;unknown;unknown	Bacteria;Firmicutes;Bacilli;Lactobacillales;Lactobacillaceae;Lactobacillus	Lactobacillus casei UW1	extrachromosomal	linear	Cluster_420
Bacilli_gi_418037156	hallmark;refseq	31;25;1;5	Viruses;dsDNA viruses no RNA stage;Caudovirales;Siphoviridae;unknown;unknown	Bacteria;Firmicutes;Bacilli;Lactobacillales;Streptococcaceae;Lactococcus	Lactococcus lactis subsp. lactis CNCM I-1631	extrachromosomal	linear	Cluster_57
Bacilli_gi_418038308	hallmark;refseq	25;16;6;3	Viruses;dsDNA viruses no RNA stage;Caudovirales;Siphoviridae;unclassified;unknown	Bacteria;Firmicutes;Bacilli;Lactobacillales;Streptococcaceae;Lactococcus	Lactococcus lactis subsp. lactis CNCM I-1631	extrachromosomal	linear	Cluster_356
Bacilli_gi_418038770	hallmark;refseq	17;17;;	Viruses;dsDNA viruses no RNA stage;Caudovirales;Siphoviridae;unknown;unknown	Bacteria;Firmicutes;Bacilli;Lactobacillales;Streptococcaceae;Lactococcus	Lactococcus lactis subsp. lactis CNCM I-1631	extrachromosomal	linear	Cluster_159
Bacilli_gi_418069249	hallmark;refseq	53;31;3;19	Viruses;dsDNA viruses no RNA stage;Caudovirales;Siphoviridae;unknown;unknown	Bacteria;Firmicutes;Bacilli;Lactobacillales;Lactobacillaceae;Pediococcus	Pediococcus acidilactici MA18/5M	extrachromosomal	linear	Cluster_32
Bacilli_gi_418072737	hallmark;refseq	54;42;1;11	Viruses;dsDNA viruses no RNA stage;Caudovirales;Siphoviridae;unclassified;unknown	Bacteria;Firmicutes;Bacilli;Lactobacillales;Lactobacillaceae;Lactobacillus	Lactobacillus rhamnosus R0011	extrachromosomal	linear	Cluster_96
Bacilli_gi_418072794	hallmark;refseq	49;42;1;6	Viruses;dsDNA viruses no RNA stage;Caudovirales;Siphoviridae;unclassified;unknown	Bacteria;Firmicutes;Bacilli;Lactobacillales;Lactobacillaceae;Lactobacillus	Lactobacillus rhamnosus R0011	extrachromosomal	linear	Cluster_133
Bacilli_gi_418075088	hallmark;refseq	53;38;2;13	Viruses;dsDNA viruses no RNA stage;Caudovirales;Siphoviridae;unknown;unknown	Bacteria;Firmicutes;Bacilli;Lactobacillales;Streptococcaceae;Streptococcus	Streptococcus pneumoniae GA47502	extrachromosomal	linear	Cluster_31
Bacilli_gi_418076765-0-17856	hallmark;refseq;vdb	30;28;2;	Viruses;dsDNA viruses no RNA stage;Caudovirales;Siphoviridae;unclassified;unknown	Bacteria;Firmicutes;Bacilli;Lactobacillales;Streptococcaceae;Streptococcus	Streptococcus pneumoniae GA47502	prophage	linear	Cluster_52
Bacilli_gi_418095085	refseq	23;22;1;	Viruses;dsDNA viruses no RNA stage;Caudovirales;Siphoviridae;unknown;unknown	Bacteria;Firmicutes;Bacilli;Lactobacillales;Streptococcaceae;Streptococcus	Streptococcus pneumoniae GA16531	extrachromosomal	linear	Cluster_30
Bacilli_gi_418104056	hallmark;refseq	27;17;3;7	Viruses;dsDNA viruses no RNA stage;Caudovirales;Siphoviridae;unclassified;unknown	Bacteria;Firmicutes;Bacilli;Lactobacillales;Streptococcaceae;Streptococcus	Streptococcus pneumoniae GA44500	extrachromosomal	linear	Cluster_50
Bacilli_gi_418105572-57782-95647	hallmark;refseq	51;50;1;	Viruses;dsDNA viruses no RNA stage;Caudovirales;Siphoviridae;C2likevirus;unknown	Bacteria;Firmicutes;Bacilli;Lactobacillales;Streptococcaceae;Streptococcus	Streptococcus pneumoniae GA44500	prophage	linear	Cluster_52
Bacilli_gi_418106402	hallmark;refseq	59;37;5;17	Viruses;dsDNA viruses no RNA stage;Caudovirales;Siphoviridae;unknown;unknown	Bacteria;Firmicutes;Bacilli;Lactobacillales;Streptococcaceae;Streptococcus	Streptococcus pneumoniae GA41410	extrachromosomal	linear	Cluster_30
Bacilli_gi_418108933	hallmark;refseq	43;28;6;9	Viruses;dsDNA viruses no RNA stage;Caudovirales;Siphoviridae;unknown;unknown	Bacteria;Firmicutes;Bacilli;Lactobacillales;Streptococcaceae;Streptococcus	Streptococcus pneumoniae GA49447	extrachromosomal	linear	Cluster_30
Bacilli_gi_418134205	hallmark;refseq	46;31;4;11	Viruses;dsDNA viruses no RNA stage;Caudovirales;Siphoviridae;unknown;unknown	Bacteria;Firmicutes;Bacilli;Lactobacillales;Streptococcaceae;Streptococcus	Streptococcus pneumoniae GA11426	extrachromosomal	linear	Cluster_30
Bacilli_gi_418135618-0-34890	hallmark;refseq	58;35;3;20	Viruses;dsDNA viruses no RNA stage;Caudovirales;Siphoviridae;unclassified;unclassified	Bacteria;Firmicutes;Bacilli;Lactobacillales;Streptococcaceae;Streptococcus	Streptococcus pneumoniae GA11426	prophage	linear	Cluster_50
Bacilli_gi_418143142	hallmark;refseq	60;44;7;9	Viruses;dsDNA viruses no RNA stage;Caudovirales;Siphoviridae;unclassified;unknown	Bacteria;Firmicutes;Bacilli;Lactobacillales;Streptococcaceae;Streptococcus	Streptococcus pneumoniae GA13494	extrachromosomal	linear	Cluster_31
Bacilli_gi_418154042	refseq	31;19;2;10	Viruses;dsDNA viruses no RNA stage;Caudovirales;Siphoviridae;unknown;unknown	Bacteria;Firmicutes;Bacilli;Lactobacillales;Streptococcaceae;Streptococcus	Streptococcus pneumoniae GA16242	extrachromosomal	linear	Cluster_52
Bacilli_gi_418161016	hallmark;refseq	48;29;5;14	Viruses;dsDNA viruses no RNA stage;Caudovirales;Siphoviridae;unknown;unknown	Bacteria;Firmicutes;Bacilli;Lactobacillales;Streptococcaceae;Streptococcus	Streptococcus pneumoniae GA17328	extrachromosomal	linear	Cluster_30
Bacilli_gi_418165586	refseq	31;20;5;6	Viruses;dsDNA viruses no RNA stage;Caudovirales;Siphoviridae;unknown;unknown	Bacteria;Firmicutes;Bacilli;Lactobacillales;Streptococcaceae;Streptococcus	Streptococcus pneumoniae GA17971	extrachromosomal	linear	Cluster_31
Bacilli_gi_418173798-108723-146533	hallmark;refseq	51;49;1;1	Viruses;dsDNA viruses no RNA stage;Caudovirales;Siphoviridae;C2likevirus;unknown	Bacteria;Firmicutes;Bacilli;Lactobacillales;Streptococcaceae;Streptococcus	Streptococcus pneumoniae GA41277	prophage	linear	Cluster_52
Bacilli_gi_418174697	hallmark;refseq	53;39;3;11	Viruses;dsDNA viruses no RNA stage;Caudovirales;Siphoviridae;unknown;unknown	Bacteria;Firmicutes;Bacilli;Lactobacillales;Streptococcaceae;Streptococcus	Streptococcus pneumoniae GA41277	extrachromosomal	linear	Cluster_30
Bacilli_gi_418174774-9159-49660	hallmark;refseq	63;40;10;13	Viruses;dsDNA viruses no RNA stage;Caudovirales;Siphoviridae;unknown;unknown	Bacteria;Firmicutes;Bacilli;Lactobacillales;Streptococcaceae;Streptococcus	Streptococcus pneumoniae GA41437	prophage	linear	Cluster_30
Bacilli_gi_418203509	hallmark	19;6;3;10	Viruses;dsDNA viruses no RNA stage;Caudovirales;Siphoviridae;unknown;unknown	Bacteria;Firmicutes;Bacilli;Lactobacillales;Streptococcaceae;Streptococcus	Streptococcus pneumoniae GA52306	extrachromosomal	linear	Cluster_469
Bacilli_gi_418217724	hallmark;refseq	42;28;5;9	Viruses;dsDNA viruses no RNA stage;Caudovirales;Siphoviridae;unknown;unknown	Bacteria;Firmicutes;Bacilli;Lactobacillales;Streptococcaceae;Streptococcus	Streptococcus pneumoniae NP127	extrachromosomal	linear	Cluster_30
Bacilli_gi_418220022	hallmark;refseq	50;37;4;9	Viruses;dsDNA viruses no RNA stage;Caudovirales;Siphoviridae;unknown;unknown	Bacteria;Firmicutes;Bacilli;Lactobacillales;Streptococcaceae;Streptococcus	Streptococcus pneumoniae GA47751	extrachromosomal	linear	Cluster_30
Bacilli_gi_418230837-0-22658	hallmark;refseq	45;27;3;15	Viruses;dsDNA viruses no RNA stage;Caudovirales;Siphoviridae;unclassified;unclassified	Bacteria;Firmicutes;Bacilli;Lactobacillales;Streptococcaceae;Streptococcus	Streptococcus pneumoniae EU-NP01	prophage	linear	Cluster_50
Bacilli_gi_418237552	hallmark;refseq	44;28;5;11	Viruses;dsDNA viruses no RNA stage;Caudovirales;Siphoviridae;unknown;unknown	Bacteria;Firmicutes;Bacilli;Lactobacillales;Streptococcaceae;Streptococcus	Streptococcus pneumoniae NorthCarolina6A-23	extrachromosomal	linear	Cluster_30
Bacilli_gi_418278709	refseq	8;5;3;	Viruses;dsDNA viruses no RNA stage;Caudovirales;Myoviridae;T4likevirus;unknown	Bacteria;Firmicutes;Bacilli;Bacillales;Staphylococcaceae;Staphylococcus	Staphylococcus aureus subsp. aureus 21178	extrachromosomal	linear	Cluster_541
Bacilli_gi_418278758	hallmark;refseq	29;29;;	Viruses;dsDNA viruses no RNA stage;Caudovirales;Siphoviridae;unclassified;unknown	Bacteria;Firmicutes;Bacilli;Bacillales;Staphylococcaceae;Staphylococcus	Staphylococcus aureus subsp. aureus 21178	extrachromosomal	linear	Cluster_49
Bacilli_gi_418279219	hallmark;refseq	23;21;2;	Viruses;dsDNA viruses no RNA stage;Caudovirales;Siphoviridae;unclassified;unknown	Bacteria;Firmicutes;Bacilli;Bacillales;Staphylococcaceae;Staphylococcus	Staphylococcus aureus subsp. aureus 21178	extrachromosomal	linear	Cluster_6
Bacilli_gi_418280714	hallmark;refseq	23;23;;	Viruses;dsDNA viruses no RNA stage;Caudovirales;Siphoviridae;unknown;unknown	Bacteria;Firmicutes;Bacilli;Bacillales;Staphylococcaceae;Staphylococcus	Staphylococcus aureus subsp. aureus 21178	extrachromosomal	linear	Cluster_40
Bacilli_gi_418281068	refseq	59;17;5;37	Viruses;dsDNA viruses no RNA stage;Caudovirales;unclassified;unclassified;unknown	Bacteria;Firmicutes;Bacilli;Bacillales;Staphylococcaceae;Staphylococcus	Staphylococcus aureus subsp. aureus 21178	extrachromosomal	linear	Cluster_194
Bacilli_gi_418281204	refseq	29;26;3;	Viruses;dsDNA viruses no RNA stage;Caudovirales;Siphoviridae;unclassified;unclassified	Bacteria;Firmicutes;Bacilli;Bacillales;Staphylococcaceae;Staphylococcus	Staphylococcus aureus subsp. aureus 21178	extrachromosomal	linear	Cluster_8
Bacilli_gi_418282152	hallmark;refseq	29;28;1;	Viruses;dsDNA viruses no RNA stage;Caudovirales;Siphoviridae;unclassified;unknown	Bacteria;Firmicutes;Bacilli;Bacillales;Staphylococcaceae;Staphylococcus	Staphylococcus aureus subsp. aureus 21202	extrachromosomal	linear	Cluster_35
Bacilli_gi_418283812	hallmark;refseq	17;17;;	Viruses;dsDNA viruses no RNA stage;Caudovirales;Siphoviridae;unclassified;unknown	Bacteria;Firmicutes;Bacilli;Bacillales;Staphylococcaceae;Staphylococcus	Staphylococcus aureus subsp. aureus 21202	extrachromosomal	linear	Cluster_56
Bacilli_gi_418284202	hallmark;refseq	16;16;;	Viruses;dsDNA viruses no RNA stage;Caudovirales;Siphoviridae;unclassified;unknown	Bacteria;Firmicutes;Bacilli;Bacillales;Staphylococcaceae;Staphylococcus	Staphylococcus aureus subsp. aureus 21202	extrachromosomal	linear	Cluster_40
Bacilli_gi_418284443-85920-116656	hallmark;refseq	35;33;1;1	Viruses;dsDNA viruses no RNA stage;Caudovirales;Siphoviridae;unclassified;unknown	Bacteria;Firmicutes;Bacilli;Bacillales;Staphylococcaceae;Staphylococcus	Staphylococcus aureus subsp. aureus 21209	prophage	linear	Cluster_6
Bacilli_gi_418286208	refseq	27;23;4;	Viruses;dsDNA viruses no RNA stage;Caudovirales;Siphoviridae;unknown;unknown	Bacteria;Firmicutes;Bacilli;Bacillales;Staphylococcaceae;Staphylococcus	Staphylococcus aureus subsp. aureus 21209	extrachromosomal	linear	Cluster_8
Bacilli_gi_418312897	hallmark;refseq	41;41;;	Viruses;dsDNA viruses no RNA stage;Caudovirales;Siphoviridae;unknown;unknown	Bacteria;Firmicutes;Bacilli;Bacillales;Staphylococcaceae;Staphylococcus	Staphylococcus aureus subsp. aureus 21334	extrachromosomal	linear	Cluster_40
Bacilli_gi_418313262	hallmark;refseq	36;36;;	Viruses;dsDNA viruses no RNA stage;Caudovirales;Siphoviridae;unclassified;unknown	Bacteria;Firmicutes;Bacilli;Bacillales;Staphylococcaceae;Staphylococcus	Staphylococcus aureus subsp. aureus 21334	extrachromosomal	linear	Cluster_49
Bacilli_gi_418314622	hallmark;refseq	57;54;3;	Viruses;dsDNA viruses no RNA stage;Caudovirales;Siphoviridae;unclassified;unknown	Bacteria;Firmicutes;Bacilli;Bacillales;Staphylococcaceae;Staphylococcus	Staphylococcus aureus subsp. aureus 21340	extrachromosomal	linear	Cluster_6
Bacilli_gi_418315920	refseq	26;26;;	Viruses;dsDNA viruses no RNA stage;Caudovirales;Siphoviridae;unknown;unknown	Bacteria;Firmicutes;Bacilli;Bacillales;Staphylococcaceae;Staphylococcus	Staphylococcus aureus subsp. aureus 21340	extrachromosomal	linear	Cluster_8
Bacilli_gi_418315944-0-28648	hallmark;refseq	36;35;;1	Viruses;dsDNA viruses no RNA stage;Caudovirales;Siphoviridae;unclassified;unknown	Bacteria;Firmicutes;Bacilli;Bacillales;Staphylococcaceae;Staphylococcus	Staphylococcus aureus subsp. aureus 21340	prophage	linear	Cluster_49
Bacilli_gi_418326388-36596-77815	hallmark;refseq	64;51;3;10	Viruses;dsDNA viruses no RNA stage;Caudovirales;Siphoviridae;unknown;unknown	Bacteria;Firmicutes;Bacilli;Bacillales;Staphylococcaceae;Staphylococcus	Staphylococcus epidermidis VCU071	prophage	linear	Cluster_8
Bacilli_gi_418329359	hallmark;refseq	23;21;;2	Viruses;dsDNA viruses no RNA stage;Caudovirales;Siphoviridae;Lambdalikevirus;unknown	Bacteria;Firmicutes;Bacilli;Bacillales;Staphylococcaceae;Staphylococcus	Staphylococcus epidermidis 14.1.R1.SE	extrachromosomal	linear	Cluster_35
Bacilli_gi_418424020	hallmark;refseq	16;16;;	Viruses;dsDNA viruses no RNA stage;Caudovirales;Siphoviridae;Lambdalikevirus;unknown	Bacteria;Firmicutes;Bacilli;Bacillales;Staphylococcaceae;Staphylococcus	Staphylococcus aureus subsp. aureus VRS1	extrachromosomal	linear	Cluster_35
Bacilli_gi_418425168	refseq	22;17;5;	Viruses;dsDNA viruses no RNA stage;Caudovirales;Siphoviridae;unknown;unknown	Bacteria;Firmicutes;Bacilli;Bacillales;Staphylococcaceae;Staphylococcus	Staphylococcus aureus subsp. aureus VRS1	extrachromosomal	linear	Cluster_223
Bacilli_gi_418425926	hallmark;refseq	35;31;3;1	Viruses;dsDNA viruses no RNA stage;Caudovirales;Siphoviridae;unclassified;unknown	Bacteria;Firmicutes;Bacilli;Bacillales;Staphylococcaceae;Staphylococcus	Staphylococcus aureus subsp. aureus VRS1	extrachromosomal	linear	Cluster_6
Bacilli_gi_418427071	hallmark;refseq	38;37;1;	Viruses;dsDNA viruses no RNA stage;Caudovirales;Siphoviridae;unclassified;unknown	Bacteria;Firmicutes;Bacilli;Bacillales;Staphylococcaceae;Staphylococcus	Staphylococcus aureus subsp. aureus VRS2	extrachromosomal	linear	Cluster_6
Bacilli_gi_418427219-0-30545	hallmark;refseq	39;38;1;	Viruses;dsDNA viruses no RNA stage;Caudovirales;Siphoviridae;unclassified;unknown	Bacteria;Firmicutes;Bacilli;Bacillales;Staphylococcaceae;Staphylococcus	Staphylococcus aureus subsp. aureus VRS2	prophage	linear	Cluster_35
Bacilli_gi_418428885	refseq	29;23;6;	Viruses;dsDNA viruses no RNA stage;Caudovirales;Siphoviridae;unknown;unknown	Bacteria;Firmicutes;Bacilli;Bacillales;Staphylococcaceae;Staphylococcus	Staphylococcus aureus subsp. aureus VRS2	extrachromosomal	linear	Cluster_6
Bacilli_gi_418432823	hallmark;refseq	25;25;;	Viruses;dsDNA viruses no RNA stage;Caudovirales;Siphoviridae;unclassified;unknown	Bacteria;Firmicutes;Bacilli;Bacillales;Staphylococcaceae;Staphylococcus	Staphylococcus aureus subsp. aureus VRS4	extrachromosomal	linear	Cluster_35
Bacilli_gi_418436451-28044-46423	hallmark;refseq	40;39;1;	Viruses;dsDNA viruses no RNA stage;Caudovirales;Siphoviridae;unknown;unknown	Bacteria;Firmicutes;Bacilli;Bacillales;Staphylococcaceae;Staphylococcus	Staphylococcus aureus subsp. aureus VRS5	prophage	linear	Cluster_8
Bacilli_gi_418437598	refseq	29;27;2;	Viruses;dsDNA viruses no RNA stage;Caudovirales;Siphoviridae;unknown;unknown	Bacteria;Firmicutes;Bacilli;Bacillales;Staphylococcaceae;Staphylococcus	Staphylococcus aureus subsp. aureus VRS5	extrachromosomal	linear	Cluster_6
Bacilli_gi_418438411	hallmark;refseq	37;36;1;	Viruses;dsDNA viruses no RNA stage;Caudovirales;Siphoviridae;unclassified;unknown	Bacteria;Firmicutes;Bacilli;Bacillales;Staphylococcaceae;Staphylococcus	Staphylococcus aureus subsp. aureus VRS5	extrachromosomal	linear	Cluster_6
Bacilli_gi_418439375-9892-16676	refseq;vdb	9;8;1;	Viruses;dsDNA viruses no RNA stage;Caudovirales;Siphoviridae;unknown;unknown	Bacteria;Firmicutes;Bacilli;Bacillales;Staphylococcaceae;Staphylococcus	Staphylococcus aureus subsp. aureus VRS6	prophage	linear	Cluster_8
Bacilli_gi_418439975	hallmark;refseq	36;33;3;	Viruses;dsDNA viruses no RNA stage;Caudovirales;Siphoviridae;unclassified;unknown	Bacteria;Firmicutes;Bacilli;Bacillales;Staphylococcaceae;Staphylococcus	Staphylococcus aureus subsp. aureus VRS6	extrachromosomal	linear	Cluster_6
Bacilli_gi_418442364	hallmark;refseq	37;36;1;	Viruses;dsDNA viruses no RNA stage;Caudovirales;Siphoviridae;unclassified;unknown	Bacteria;Firmicutes;Bacilli;Bacillales;Staphylococcaceae;Staphylococcus	Staphylococcus aureus subsp. aureus VRS7	extrachromosomal	linear	Cluster_8
Bacilli_gi_418442426	refseq	13;12;;1	Viruses;dsDNA viruses no RNA stage;Caudovirales;Siphoviridae;unclassified;unknown	Bacteria;Firmicutes;Bacilli;Bacillales;Staphylococcaceae;Staphylococcus	Staphylococcus aureus subsp. aureus VRS7	extrachromosomal	linear	Cluster_35
Bacilli_gi_418443471	hallmark;refseq	36;34;1;1	Viruses;dsDNA viruses no RNA stage;Caudovirales;Siphoviridae;unknown;unknown	Bacteria;Firmicutes;Bacilli;Bacillales;Staphylococcaceae;Staphylococcus	Staphylococcus aureus subsp. aureus VRS7	extrachromosomal	linear	Cluster_40
Bacilli_gi_418444227	hallmark;refseq	38;36;1;1	Viruses;dsDNA viruses no RNA stage;Caudovirales;Siphoviridae;unclassified;unknown	Bacteria;Firmicutes;Bacilli;Bacillales;Staphylococcaceae;Staphylococcus	Staphylococcus aureus subsp. aureus VRS7	extrachromosomal	linear	Cluster_6
Bacilli_gi_418444355	refseq	11;11;;	Viruses;dsDNA viruses no RNA stage;Caudovirales;Siphoviridae;unclassified;unknown	Bacteria;Firmicutes;Bacilli;Bacillales;Staphylococcaceae;Staphylococcus	Staphylococcus aureus subsp. aureus VRS7	extrachromosomal	linear	Cluster_35
Bacilli_gi_418444369	refseq	26;24;2;	Viruses;dsDNA viruses no RNA stage;Caudovirales;Siphoviridae;unknown;unknown	Bacteria;Firmicutes;Bacilli;Bacillales;Staphylococcaceae;Staphylococcus	Staphylococcus aureus subsp. aureus VRS7	extrachromosomal	linear	Cluster_6
Bacilli_gi_418447255	hallmark;refseq	44;41;2;1	Viruses;dsDNA viruses no RNA stage;Caudovirales;Siphoviridae;Lambdalikevirus;unknown	Bacteria;Firmicutes;Bacilli;Bacillales;Staphylococcaceae;Staphylococcus	Staphylococcus aureus subsp. aureus VRS8	extrachromosomal	linear	Cluster_8
Bacilli_gi_418447301	hallmark;refseq	34;32;2;	Viruses;dsDNA viruses no RNA stage;Caudovirales;Siphoviridae;unclassified;unknown	Bacteria;Firmicutes;Bacilli;Bacillales;Staphylococcaceae;Staphylococcus	Staphylococcus aureus subsp. aureus VRS8	extrachromosomal	linear	Cluster_6
Bacilli_gi_418447335	hallmark;refseq	36;33;2;1	Viruses;dsDNA viruses no RNA stage;Caudovirales;Siphoviridae;unclassified;unknown	Bacteria;Firmicutes;Bacilli;Bacillales;Staphylococcaceae;Staphylococcus	Staphylococcus aureus subsp. aureus VRS8	extrachromosomal	linear	Cluster_8
Bacilli_gi_418447372	hallmark;refseq	31;31;;	Viruses;dsDNA viruses no RNA stage;Caudovirales;Siphoviridae;unknown;unknown	Bacteria;Firmicutes;Bacilli;Bacillales;Staphylococcaceae;Staphylococcus	Staphylococcus aureus subsp. aureus VRS8	extrachromosomal	linear	Cluster_40
Bacilli_gi_418449033	hallmark;refseq	72;63;7;2	Viruses;dsDNA viruses no RNA stage;Caudovirales;Siphoviridae;unclassified;unknown	Bacteria;Firmicutes;Bacilli;Bacillales;Staphylococcaceae;Staphylococcus	Staphylococcus aureus subsp. aureus VRS9	extrachromosomal	linear	Cluster_6
Bacilli_gi_418451522-387519-433306	hallmark;refseq	68;64;4;	Viruses;dsDNA viruses no RNA stage;Caudovirales;Siphoviridae;unclassified;unknown	Bacteria;Firmicutes;Bacilli;Bacillales;Staphylococcaceae;Staphylococcus	Staphylococcus aureus subsp. aureus VRS10	prophage	linear	Cluster_6
Bacilli_gi_418453252	hallmark;refseq	25;24;1;	Viruses;dsDNA viruses no RNA stage;Caudovirales;Siphoviridae;unclassified;unknown	Bacteria;Firmicutes;Bacilli;Bacillales;Staphylococcaceae;Staphylococcus	Staphylococcus aureus subsp. aureus VRS10	extrachromosomal	linear	Cluster_49
Bacilli_gi_418454265-6091-48807	hallmark;refseq	63;61;2;	Viruses;dsDNA viruses no RNA stage;Caudovirales;Siphoviridae;unclassified;unknown	Bacteria;Firmicutes;Bacilli;Bacillales;Staphylococcaceae;Staphylococcus	Staphylococcus aureus subsp. aureus VRS11a	prophage	linear	Cluster_8
Bacilli_gi_418456138	hallmark;refseq	49;46;3;	Viruses;dsDNA viruses no RNA stage;Caudovirales;Siphoviridae;unclassified;unknown	Bacteria;Firmicutes;Bacilli;Bacillales;Staphylococcaceae;Staphylococcus	Staphylococcus aureus subsp. aureus VRS11a	extrachromosomal	linear	Cluster_6
Bacilli_gi_418456274	refseq	12;12;;	Viruses;dsDNA viruses no RNA stage;Caudovirales;Siphoviridae;unclassified;unknown	Bacteria;Firmicutes;Bacilli;Bacillales;Staphylococcaceae;Staphylococcus	Staphylococcus aureus subsp. aureus VRS11a	extrachromosomal	linear	Cluster_6
Bacilli_gi_418457141-6089-48805	hallmark;refseq	63;61;2;	Viruses;dsDNA viruses no RNA stage;Caudovirales;Siphoviridae;unclassified;unknown	Bacteria;Firmicutes;Bacilli;Bacillales;Staphylococcaceae;Staphylococcus	Staphylococcus aureus subsp. aureus VRS11b	prophage	linear	Cluster_8
Bacilli_gi_418459014	hallmark;refseq	61;57;4;	Viruses;dsDNA viruses no RNA stage;Caudovirales;Siphoviridae;unclassified;unknown	Bacteria;Firmicutes;Bacilli;Bacillales;Staphylococcaceae;Staphylococcus	Staphylococcus aureus subsp. aureus VRS11b	extrachromosomal	linear	Cluster_6
Bacilli_gi_418558834-21519-67828	hallmark;refseq	69;65;3;1	Viruses;dsDNA viruses no RNA stage;Caudovirales;Siphoviridae;unclassified;unknown	Bacteria;Firmicutes;Bacilli;Bacillales;Staphylococcaceae;Staphylococcus	Staphylococcus aureus subsp. aureus 21252	prophage	linear	Cluster_6
Bacilli_gi_418562342-90474-138012	hallmark;refseq	65;62;1;2	Viruses;dsDNA viruses no RNA stage;Caudovirales;Siphoviridae;unclassified;unknown	Bacteria;Firmicutes;Bacilli;Bacillales;Staphylococcaceae;Staphylococcus	Staphylococcus aureus subsp. aureus 21262	prophage	linear	Cluster_6
Bacilli_gi_418564521-0-42382	hallmark;refseq	60;54;5;1	Viruses;dsDNA viruses no RNA stage;Caudovirales;Siphoviridae;unclassified;unknown	Bacteria;Firmicutes;Bacilli;Bacillales;Staphylococcaceae;Staphylococcus	Staphylococcus aureus subsp. aureus 21264	prophage	linear	Cluster_6
Bacilli_gi_418566521	hallmark;refseq	63;56;5;2	Viruses;dsDNA viruses no RNA stage;Caudovirales;Siphoviridae;unknown;unknown	Bacteria;Firmicutes;Bacilli;Bacillales;Staphylococcaceae;Staphylococcus	Staphylococcus aureus subsp. aureus 21264	extrachromosomal	linear	Cluster_40
Bacilli_gi_418568452-178206-212060	hallmark;refseq	41;40;1;	Viruses;dsDNA viruses no RNA stage;Caudovirales;Siphoviridae;unclassified;unknown	Bacteria;Firmicutes;Bacilli;Bacillales;Staphylococcaceae;Staphylococcus	Staphylococcus aureus subsp. aureus 21272	prophage	linear	Cluster_6
Bacilli_gi_418569179-107310-136745	hallmark;refseq	40;40;;	Viruses;dsDNA viruses no RNA stage;Caudovirales;Siphoviridae;unclassified;unknown	Bacteria;Firmicutes;Bacilli;Bacillales;Staphylococcaceae;Staphylococcus	Staphylococcus aureus subsp. aureus 21272	prophage	linear	Cluster_49
Bacilli_gi_418569702	refseq	27;16;8;3	Viruses;dsDNA viruses no RNA stage;unclassified;unclassified;unknown;unknown	Bacteria;Firmicutes;Bacilli;Bacillales;Staphylococcaceae;Staphylococcus	Staphylococcus aureus subsp. aureus 21283	extrachromosomal	linear	Cluster_254
Bacilli_gi_418569780	hallmark;refseq	21;21;;	Viruses;dsDNA viruses no RNA stage;Caudovirales;Siphoviridae;Lambdalikevirus;unknown	Bacteria;Firmicutes;Bacilli;Bacillales;Staphylococcaceae;Staphylococcus	Staphylococcus aureus subsp. aureus 21283	extrachromosomal	linear	Cluster_49
Bacilli_gi_418571191	hallmark;refseq	22;21;1;	Viruses;dsDNA viruses no RNA stage;Caudovirales;Siphoviridae;Lambdalikevirus;unknown	Bacteria;Firmicutes;Bacilli;Bacillales;Staphylococcaceae;Staphylococcus	Staphylococcus aureus subsp. aureus 21283	extrachromosomal	linear	Cluster_35
Bacilli_gi_418571259	hallmark;refseq	30;30;;	Viruses;dsDNA viruses no RNA stage;Caudovirales;Siphoviridae;unknown;unknown	Bacteria;Firmicutes;Bacilli;Bacillales;Staphylococcaceae;Staphylococcus	Staphylococcus aureus subsp. aureus 21283	extrachromosomal	linear	Cluster_40
Bacilli_gi_418572921	hallmark;refseq	62;56;3;3	Viruses;dsDNA viruses no RNA stage;Caudovirales;Siphoviridae;unclassified;unknown	Bacteria;Firmicutes;Bacilli;Bacillales;Staphylococcaceae;Staphylococcus	Staphylococcus aureus subsp. aureus 21333	extrachromosomal	linear	Cluster_6
Bacilli_gi_418574723-1492-41667	hallmark;refseq	58;53;4;1	Viruses;dsDNA viruses no RNA stage;Caudovirales;Siphoviridae;unknown;unknown	Bacteria;Firmicutes;Bacilli;Bacillales;Staphylococcaceae;Staphylococcus	Staphylococcus aureus subsp. aureus 21333	prophage	linear	Cluster_56
Bacilli_gi_418578406-1011714-1056771	hallmark;refseq	67;64;2;1	Viruses;dsDNA viruses no RNA stage;Caudovirales;Siphoviridae;unclassified;unknown	Bacteria;Firmicutes;Bacilli;Bacillales;Staphylococcaceae;Staphylococcus	Staphylococcus aureus subsp. aureus CIG1114	prophage	linear	Cluster_6
Bacilli_gi_418581925-0-28052	hallmark;refseq	34;33;1;	Viruses;dsDNA viruses no RNA stage;Caudovirales;Siphoviridae;unclassified;unknown	Bacteria;Firmicutes;Bacilli;Bacillales;Staphylococcaceae;Staphylococcus	Staphylococcus aureus subsp. aureus CIG1605	prophage	linear	Cluster_35
Bacilli_gi_418581925-470970-518224	hallmark;refseq	68;64;4;	Viruses;dsDNA viruses no RNA stage;Caudovirales;Siphoviridae;unclassified;unknown	Bacteria;Firmicutes;Bacilli;Bacillales;Staphylococcaceae;Staphylococcus	Staphylococcus aureus subsp. aureus CIG1605	prophage	linear	Cluster_6
Bacilli_gi_418595755	hallmark;refseq	29;29;;	Viruses;dsDNA viruses no RNA stage;Caudovirales;Siphoviridae;unclassified;unknown	Bacteria;Firmicutes;Bacilli;Bacillales;Staphylococcaceae;Staphylococcus	Staphylococcus aureus subsp. aureus 21342	extrachromosomal	linear	Cluster_49
Bacilli_gi_418595872	refseq	31;29;2;	Viruses;dsDNA viruses no RNA stage;Caudovirales;Siphoviridae;unknown;unknown	Bacteria;Firmicutes;Bacilli;Bacillales;Staphylococcaceae;Staphylococcus	Staphylococcus aureus subsp. aureus 21342	extrachromosomal	linear	Cluster_8
Bacilli_gi_418595951	refseq	27;23;3;1	Viruses;dsDNA viruses no RNA stage;Caudovirales;Siphoviridae;unknown;unknown	Bacteria;Firmicutes;Bacilli;Bacillales;Staphylococcaceae;Staphylococcus	Staphylococcus aureus subsp. aureus 21342	extrachromosomal	linear	Cluster_8
Bacilli_gi_418596659	hallmark;refseq	36;33;1;2	Viruses;dsDNA viruses no RNA stage;Caudovirales;Siphoviridae;unknown;unknown	Bacteria;Firmicutes;Bacilli;Bacillales;Staphylococcaceae;Staphylococcus	Staphylococcus aureus subsp. aureus 21342	extrachromosomal	linear	Cluster_40
Bacilli_gi_418597930	hallmark;refseq	22;22;;	Viruses;dsDNA viruses no RNA stage;Caudovirales;Siphoviridae;Lambdalikevirus;unknown	Bacteria;Firmicutes;Bacilli;Bacillales;Staphylococcaceae;Staphylococcus	Staphylococcus aureus subsp. aureus 21343	extrachromosomal	linear	Cluster_49
Bacilli_gi_418598785-0-32717	hallmark;refseq	60;56;4;	Viruses;dsDNA viruses no RNA stage;Caudovirales;Siphoviridae;Lambdalikevirus;unknown	Bacteria;Firmicutes;Bacilli;Bacillales;Staphylococcaceae;Staphylococcus	Staphylococcus aureus subsp. aureus 21343	prophage	linear	Cluster_8
Bacilli_gi_418598920-1492-28407	hallmark;refseq	34;32;;2	Viruses;dsDNA viruses no RNA stage;Caudovirales;Siphoviridae;unknown;unknown	Bacteria;Firmicutes;Bacilli;Bacillales;Staphylococcaceae;Staphylococcus	Staphylococcus aureus subsp. aureus 21343	prophage	linear	Cluster_40
Bacilli_gi_418602195	hallmark;refseq	59;55;4;	Viruses;dsDNA viruses no RNA stage;Caudovirales;Siphoviridae;Lambdalikevirus;unknown	Bacteria;Firmicutes;Bacilli;Bacillales;Staphylococcaceae;Staphylococcus	Staphylococcus aureus subsp. aureus 21345	extrachromosomal	linear	Cluster_8
Bacilli_gi_418603245	hallmark;refseq	46;43;2;1	Viruses;dsDNA viruses no RNA stage;Caudovirales;Siphoviridae;unknown;unknown	Bacteria;Firmicutes;Bacilli;Bacillales;Staphylococcaceae;Staphylococcus	Staphylococcus aureus subsp. aureus 21345	extrachromosomal	linear	Cluster_40
Bacilli_gi_418604393-14973-50087	hallmark;refseq	47;24;3;20	Viruses;dsDNA viruses no RNA stage;Caudovirales;Siphoviridae;unknown;unknown	Bacteria;Firmicutes;Bacilli;Bacillales;Staphylococcaceae;Staphylococcus	Staphylococcus epidermidis VCU041	prophage	linear	Cluster_257
Bacilli_gi_418610180	hallmark;refseq	68;55;6;7	Viruses;dsDNA viruses no RNA stage;Caudovirales;Siphoviridae;unclassified;unknown	Bacteria;Firmicutes;Bacilli;Bacillales;Staphylococcaceae;Staphylococcus	Staphylococcus epidermidis VCU065	extrachromosomal	linear	Cluster_8
Bacilli_gi_418613544	hallmark;refseq	64;57;3;4	Viruses;dsDNA viruses no RNA stage;Caudovirales;unclassified;unclassified;unclassified	Bacteria;Firmicutes;Bacilli;Bacillales;Staphylococcaceae;Staphylococcus	Staphylococcus epidermidis VCU118	extrachromosomal	linear	Cluster_8
Bacilli_gi_418613735-8867-46749	hallmark;refseq	47;24;3;20	Viruses;dsDNA viruses no RNA stage;Caudovirales;Siphoviridae;unknown;unknown	Bacteria;Firmicutes;Bacilli;Bacillales;Staphylococcaceae;Staphylococcus	Staphylococcus epidermidis VCU118	prophage	linear	Cluster_257
Bacilli_gi_418621305	hallmark;refseq	66;53;6;7	Viruses;dsDNA viruses no RNA stage;Caudovirales;Siphoviridae;unclassified;unknown	Bacteria;Firmicutes;Bacilli;Bacillales;Staphylococcaceae;Staphylococcus	Staphylococcus epidermidis VCU123	extrachromosomal	linear	Cluster_6
Bacilli_gi_418638786	hallmark;refseq	33;33;;	Viruses;dsDNA viruses no RNA stage;Caudovirales;Siphoviridae;unknown;unknown	Bacteria;Firmicutes;Bacilli;Bacillales;Staphylococcaceae;Staphylococcus	Staphylococcus aureus subsp. aureus IS-3	extrachromosomal	linear	Cluster_40
Bacilli_gi_418641661-86743-133361	hallmark;refseq	70;66;2;2	Viruses;dsDNA viruses no RNA stage;Caudovirales;Siphoviridae;unclassified;unknown	Bacteria;Firmicutes;Bacilli;Bacillales;Staphylococcaceae;Staphylococcus	Staphylococcus aureus subsp. aureus IS-24	prophage	linear	Cluster_6
Bacilli_gi_418643491	hallmark;refseq	120;80;35;5	Viruses;dsDNA viruses no RNA stage;Caudovirales;Siphoviridae;unknown;unknown	Bacteria;Firmicutes;Bacilli;Bacillales;Staphylococcaceae;Staphylococcus	Staphylococcus aureus subsp. aureus IS-55	extrachromosomal	linear	Cluster_56
Bacilli_gi_418646258	hallmark;refseq	71;60;7;4	Viruses;dsDNA viruses no RNA stage;Caudovirales;Siphoviridae;unknown;unknown	Bacteria;Firmicutes;Bacilli;Bacillales;Staphylococcaceae;Staphylococcus	Staphylococcus aureus subsp. aureus IS-88	extrachromosomal	linear	Cluster_40
Bacilli_gi_418646970	hallmark;refseq	42;39;1;2	Viruses;dsDNA viruses no RNA stage;Caudovirales;Siphoviridae;unknown;unknown	Bacteria;Firmicutes;Bacilli;Bacillales;Staphylococcaceae;Staphylococcus	Staphylococcus aureus subsp. aureus IS-88	extrachromosomal	linear	Cluster_6
Bacilli_gi_418648883	hallmark;refseq	29;26;3;	Viruses;dsDNA viruses no RNA stage;Caudovirales;Siphoviridae;Lambdalikevirus;unknown	Bacteria;Firmicutes;Bacilli;Bacillales;Staphylococcaceae;Staphylococcus	Staphylococcus aureus subsp. aureus IS-88	extrachromosomal	linear	Cluster_6
Bacilli_gi_418650355-102333-148584	hallmark;refseq	68;65;2;1	Viruses;dsDNA viruses no RNA stage;Caudovirales;Siphoviridae;unclassified;unknown	Bacteria;Firmicutes;Bacilli;Bacillales;Staphylococcaceae;Staphylococcus	Staphylococcus aureus subsp. aureus IS-91	prophage	linear	Cluster_6
Bacilli_gi_418653784	refseq	16;16;;	Viruses;dsDNA viruses no RNA stage;Caudovirales;Siphoviridae;unclassified;unknown	Bacteria;Firmicutes;Bacilli;Bacillales;Staphylococcaceae;Staphylococcus	Staphylococcus aureus subsp. aureus IS-99	extrachromosomal	linear	Cluster_35
Bacilli_gi_418655351	hallmark;refseq	36;35;1;	Viruses;dsDNA viruses no RNA stage;Caudovirales;Siphoviridae;unclassified;unknown	Bacteria;Firmicutes;Bacilli;Bacillales;Staphylococcaceae;Staphylococcus	Staphylococcus aureus subsp. aureus IS-105	extrachromosomal	linear	Cluster_8
Bacilli_gi_418655824	hallmark;refseq	38;36;2;	Viruses;dsDNA viruses no RNA stage;Caudovirales;Siphoviridae;unknown;unknown	Bacteria;Firmicutes;Bacilli;Bacillales;Staphylococcaceae;Staphylococcus	Staphylococcus aureus subsp. aureus IS-105	extrachromosomal	linear	Cluster_40
Bacilli_gi_418656049	hallmark;refseq	12;12;;	Viruses;dsDNA viruses no RNA stage;Caudovirales;Siphoviridae;Lambdalikevirus;unknown	Bacteria;Firmicutes;Bacilli;Bacillales;Staphylococcaceae;Staphylococcus	Staphylococcus aureus subsp. aureus IS-105	extrachromosomal	linear	Cluster_56
Bacilli_gi_418658992-19-19168	refseq	36;34;1;1	Viruses;dsDNA viruses no RNA stage;Caudovirales;Siphoviridae;unknown;unknown	Bacteria;Firmicutes;Bacilli;Bacillales;Staphylococcaceae;Staphylococcus	Staphylococcus aureus subsp. aureus IS-111	prophage	linear	Cluster_6
Bacilli_gi_418659253	hallmark;refseq	45;35;7;3	Viruses;dsDNA viruses no RNA stage;Caudovirales;Siphoviridae;unclassified;unknown	Bacteria;Firmicutes;Bacilli;Bacillales;Staphylococcaceae;Staphylococcus	Staphylococcus aureus subsp. aureus IS-111	extrachromosomal	linear	Cluster_35
Bacilli_gi_418660152	hallmark;refseq	28;27;1;	Viruses;dsDNA viruses no RNA stage;Caudovirales;Siphoviridae;Lambdalikevirus;unknown	Bacteria;Firmicutes;Bacilli;Bacillales;Staphylococcaceae;Staphylococcus	Staphylococcus aureus subsp. aureus IS-111	extrachromosomal	linear	Cluster_6
Bacilli_gi_418660466	hallmark;refseq	23;23;;	Viruses;dsDNA viruses no RNA stage;Caudovirales;Siphoviridae;unknown;unknown	Bacteria;Firmicutes;Bacilli;Bacillales;Staphylococcaceae;Staphylococcus	Staphylococcus aureus subsp. aureus IS-111	extrachromosomal	linear	Cluster_40
Bacilli_gi_418663301-72717-96992	hallmark;refseq	41;38;3;	Viruses;dsDNA viruses no RNA stage;Caudovirales;Siphoviridae;unknown;unknown	Bacteria;Firmicutes;Bacilli;Bacillales;Staphylococcaceae;Staphylococcus	Staphylococcus aureus subsp. aureus IS-122	prophage	linear	Cluster_6
Bacilli_gi_418870895	hallmark;refseq	22;21;1;	Viruses;dsDNA viruses no RNA stage;Caudovirales;Siphoviridae;unknown;unknown	Bacteria;Firmicutes;Bacilli;Bacillales;Staphylococcaceae;Staphylococcus	Staphylococcus aureus subsp. aureus IS-125	extrachromosomal	linear	Cluster_56
Bacilli_gi_418870917	hallmark;refseq	35;34;1;	Viruses;dsDNA viruses no RNA stage;Caudovirales;Siphoviridae;unclassified;unknown	Bacteria;Firmicutes;Bacilli;Bacillales;Staphylococcaceae;Staphylococcus	Staphylococcus aureus subsp. aureus IS-125	extrachromosomal	linear	Cluster_35
Bacilli_gi_418871717	hallmark;refseq	20;19;1;	Viruses;dsDNA viruses no RNA stage;Caudovirales;Siphoviridae;unclassified;unknown	Bacteria;Firmicutes;Bacilli;Bacillales;Staphylococcaceae;Staphylococcus	Staphylococcus aureus subsp. aureus IS-125	extrachromosomal	linear	Cluster_56
Bacilli_gi_418871954	refseq	28;14;6;8	Viruses;dsDNA viruses no RNA stage;unknown;unknown;unknown;unknown	Bacteria;Firmicutes;Bacilli;Bacillales;Staphylococcaceae;Staphylococcus	Staphylococcus aureus subsp. aureus IS-125	extrachromosomal	linear	Cluster_254
Bacilli_gi_418872635	hallmark;refseq	42;40;2;	Viruses;dsDNA viruses no RNA stage;Caudovirales;Siphoviridae;unclassified;unknown	Bacteria;Firmicutes;Bacilli;Bacillales;Staphylococcaceae;Staphylococcus	Staphylococcus aureus subsp. aureus IS-125	extrachromosomal	linear	Cluster_40
Bacilli_gi_418877365-324549-360575	hallmark;refseq	60;59;1;	Viruses;dsDNA viruses no RNA stage;Caudovirales;Siphoviridae;Lambdalikevirus;unknown	Bacteria;Firmicutes;Bacilli;Bacillales;Staphylococcaceae;Staphylococcus	Staphylococcus aureus subsp. aureus CIG1165	prophage	linear	Cluster_8
Bacilli_gi_418877725	hallmark;refseq	19;19;;	Viruses;dsDNA viruses no RNA stage;Caudovirales;Siphoviridae;Lambdalikevirus;unknown	Bacteria;Firmicutes;Bacilli;Bacillales;Staphylococcaceae;Staphylococcus	Staphylococcus aureus subsp. aureus CIG1165	extrachromosomal	linear	Cluster_35
Bacilli_gi_418877970-427303-474658	hallmark;refseq	75;69;4;2	Viruses;dsDNA viruses no RNA stage;Caudovirales;Siphoviridae;unclassified;unknown	Bacteria;Firmicutes;Bacilli;Bacillales;Staphylococcaceae;Staphylococcus	Staphylococcus aureus subsp. aureus CIG1165	prophage	linear	Cluster_6
Bacilli_gi_418879131	hallmark;refseq	35;30;5;	Viruses;dsDNA viruses no RNA stage;Caudovirales;Siphoviridae;unknown;unknown	Bacteria;Firmicutes;Bacilli;Bacillales;Staphylococcaceae;Staphylococcus	Staphylococcus aureus subsp. aureus CIG1165	extrachromosomal	linear	Cluster_8
Bacilli_gi_418879198	refseq	39;33;5;1	Viruses;dsDNA viruses no RNA stage;Caudovirales;Siphoviridae;unclassified;unknown	Bacteria;Firmicutes;Bacilli;Bacillales;Staphylococcaceae;Staphylococcus	Staphylococcus aureus subsp. aureus CIG1213	extrachromosomal	linear	Cluster_6
Bacilli_gi_418879237-0-36335	hallmark;refseq	60;56;4;	Viruses;dsDNA viruses no RNA stage;Caudovirales;Siphoviridae;unclassified;unknown	Bacteria;Firmicutes;Bacilli;Bacillales;Staphylococcaceae;Staphylococcus	Staphylococcus aureus subsp. aureus CIG1213	prophage	linear	Cluster_6
Bacilli_gi_418881987-0-66145	hallmark;refseq	100;92;8;	Viruses;dsDNA viruses no RNA stage;Caudovirales;Siphoviridae;unclassified;unknown	Bacteria;Firmicutes;Bacilli;Bacillales;Staphylococcaceae;Staphylococcus	Staphylococcus aureus subsp. aureus CIG1769	prophage	linear	Cluster_6
Bacilli_gi_418891704	hallmark;refseq	49;43;5;1	Viruses;dsDNA viruses no RNA stage;Caudovirales;Siphoviridae;unclassified;unknown	Bacteria;Firmicutes;Bacilli;Bacillales;Staphylococcaceae;Staphylococcus	Staphylococcus aureus subsp. aureus CIG1176	extrachromosomal	linear	Cluster_8
Bacilli_gi_418891978-215212-262466	hallmark;refseq	68;64;4;	Viruses;dsDNA viruses no RNA stage;Caudovirales;Siphoviridae;unclassified;unknown	Bacteria;Firmicutes;Bacilli;Bacillales;Staphylococcaceae;Staphylococcus	Staphylococcus aureus subsp. aureus CIG1176	prophage	linear	Cluster_6
Bacilli_gi_418892898	refseq	48;34;12;2	Viruses;dsDNA viruses no RNA stage;Caudovirales;Siphoviridae;unknown;unknown	Bacteria;Firmicutes;Bacilli;Bacillales;Staphylococcaceae;Staphylococcus	Staphylococcus aureus subsp. aureus CIG1176	extrachromosomal	linear	Cluster_223
Bacilli_gi_418893975-328443-364711	hallmark;refseq	63;61;2;	Viruses;dsDNA viruses no RNA stage;Caudovirales;Siphoviridae;Lambdalikevirus;unknown	Bacteria;Firmicutes;Bacilli;Bacillales;Staphylococcaceae;Staphylococcus	Staphylococcus aureus subsp. aureus CIG1057	prophage	linear	Cluster_8
Bacilli_gi_418894347	hallmark;refseq	19;18;;1	Viruses;dsDNA viruses no RNA stage;Caudovirales;Siphoviridae;Lambdalikevirus;unknown	Bacteria;Firmicutes;Bacilli;Bacillales;Staphylococcaceae;Staphylococcus	Staphylococcus aureus subsp. aureus CIG1057	extrachromosomal	linear	Cluster_35
Bacilli_gi_418894720-0-22965	hallmark;refseq	26;26;;	Viruses;dsDNA viruses no RNA stage;Caudovirales;Siphoviridae;Lambdalikevirus;unknown	Bacteria;Firmicutes;Bacilli;Bacillales;Staphylococcaceae;Staphylococcus	Staphylococcus aureus subsp. aureus CIG1057	prophage	linear	Cluster_35
Bacilli_gi_418894892-351648-397765	hallmark;refseq	71;66;3;2	Viruses;dsDNA viruses no RNA stage;Caudovirales;Siphoviridae;unclassified;unknown	Bacteria;Firmicutes;Bacilli;Bacillales;Staphylococcaceae;Staphylococcus	Staphylococcus aureus subsp. aureus CIG1057	prophage	linear	Cluster_6
Bacilli_gi_418897457	refseq	27;24;2;1	Viruses;dsDNA viruses no RNA stage;Caudovirales;Siphoviridae;unclassified;unknown	Bacteria;Firmicutes;Bacilli;Bacillales;Staphylococcaceae;Staphylococcus	Staphylococcus aureus subsp. aureus CIGC341D	extrachromosomal	linear	Cluster_8
Bacilli_gi_418897538-553874-601128	hallmark;refseq	68;64;4;	Viruses;dsDNA viruses no RNA stage;Caudovirales;Siphoviridae;unclassified;unknown	Bacteria;Firmicutes;Bacilli;Bacillales;Staphylococcaceae;Staphylococcus	Staphylococcus aureus subsp. aureus CIGC341D	prophage	linear	Cluster_6
Bacilli_gi_418899734	refseq	39;30;8;1	Viruses;dsDNA viruses no RNA stage;Caudovirales;Siphoviridae;unknown;unknown	Bacteria;Firmicutes;Bacilli;Bacillales;Staphylococcaceae;Staphylococcus	Staphylococcus aureus subsp. aureus CIG1214	extrachromosomal	linear	Cluster_223
Bacilli_gi_418900471-0-40889	hallmark;refseq	65;60;4;1	Viruses;dsDNA viruses no RNA stage;Caudovirales;Siphoviridae;unclassified;unknown	Bacteria;Firmicutes;Bacilli;Bacillales;Staphylococcaceae;Staphylococcus	Staphylococcus aureus subsp. aureus CIG1214	prophage	linear	Cluster_8
Bacilli_gi_418900929-0-44215	hallmark;refseq	65;61;4;	Viruses;dsDNA viruses no RNA stage;Caudovirales;Siphoviridae;unclassified;unknown	Bacteria;Firmicutes;Bacilli;Bacillales;Staphylococcaceae;Staphylococcus	Staphylococcus aureus subsp. aureus CIG1214	prophage	linear	Cluster_6
Bacilli_gi_418901405	hallmark;refseq	43;41;1;1	Viruses;dsDNA viruses no RNA stage;Caudovirales;Siphoviridae;Lambdalikevirus;unknown	Bacteria;Firmicutes;Bacilli;Bacillales;Staphylococcaceae;Staphylococcus	Staphylococcus aureus subsp. aureus CIG1214	extrachromosomal	linear	Cluster_35
Bacilli_gi_418902777-1012535-1057592	hallmark;refseq	66;63;2;1	Viruses;dsDNA viruses no RNA stage;Caudovirales;Siphoviridae;unclassified;unknown	Bacteria;Firmicutes;Bacilli;Bacillales;Staphylococcaceae;Staphylococcus	Staphylococcus aureus subsp. aureus CIG1770	prophage	linear	Cluster_6
Bacilli_gi_418908158-17497-52198	hallmark;refseq	54;51;2;1	Viruses;dsDNA viruses no RNA stage;Caudovirales;Siphoviridae;unclassified;unknown	Bacteria;Firmicutes;Bacilli;Bacillales;Staphylococcaceae;Staphylococcus	Staphylococcus aureus subsp. aureus CIG149	prophage	linear	Cluster_40
Bacilli_gi_418910738-210568-255154	hallmark;refseq	67;62;3;2	Viruses;dsDNA viruses no RNA stage;Caudovirales;Siphoviridae;unclassified;unknown	Bacteria;Firmicutes;Bacilli;Bacillales;Staphylococcaceae;Staphylococcus	Staphylococcus aureus subsp. aureus CIG547	prophage	linear	Cluster_6
Bacilli_gi_418916784-587452-634706	hallmark;refseq	68;64;4;	Viruses;dsDNA viruses no RNA stage;Caudovirales;Siphoviridae;unclassified;unknown	Bacteria;Firmicutes;Bacilli;Bacillales;Staphylococcaceae;Staphylococcus	Staphylococcus aureus subsp. aureus CIG1267	prophage	linear	Cluster_6
Bacilli_gi_418917818-126423-196354	hallmark;refseq	98;83;11;4	Viruses;dsDNA viruses no RNA stage;Caudovirales;Siphoviridae;unknown;unknown	Bacteria;Firmicutes;Bacilli;Bacillales;Staphylococcaceae;Staphylococcus	Staphylococcus aureus subsp. aureus CIG1267	prophage	linear	Cluster_223
Bacilli_gi_418918827-312809-356609	hallmark;refseq	61;57;3;1	Viruses;dsDNA viruses no RNA stage;Caudovirales;Siphoviridae;unclassified;unknown	Bacteria;Firmicutes;Bacilli;Bacillales;Staphylococcaceae;Staphylococcus	Staphylococcus aureus subsp. aureus CIGC348	prophage	linear	Cluster_6
Bacilli_gi_418922961-181243-228496	hallmark;refseq	70;66;4;	Viruses;dsDNA viruses no RNA stage;Caudovirales;Siphoviridae;unclassified;unknown	Bacteria;Firmicutes;Bacilli;Bacillales;Staphylococcaceae;Staphylococcus	Staphylococcus aureus subsp. aureus CIG1233	prophage	linear	Cluster_6
Bacilli_gi_418926576	hallmark;refseq	42;38;3;1	Viruses;dsDNA viruses no RNA stage;Caudovirales;Siphoviridae;unclassified;unknown	Bacteria;Firmicutes;Bacilli;Bacillales;Staphylococcaceae;Staphylococcus	Staphylococcus aureus subsp. aureus CIG2018	extrachromosomal	linear	Cluster_6
Bacilli_gi_418926619	refseq	28;25;3;	Viruses;dsDNA viruses no RNA stage;Caudovirales;Siphoviridae;unknown;unknown	Bacteria;Firmicutes;Bacilli;Bacillales;Staphylococcaceae;Staphylococcus	Staphylococcus aureus subsp. aureus CIG2018	extrachromosomal	linear	Cluster_6
Bacilli_gi_418927831-1013269-1058328	hallmark;refseq	67;64;2;1	Viruses;dsDNA viruses no RNA stage;Caudovirales;Siphoviridae;unclassified;unknown	Bacteria;Firmicutes;Bacilli;Bacillales;Staphylococcaceae;Staphylococcus	Staphylococcus aureus subsp. aureus CIG1612	prophage	linear	Cluster_6
Bacilli_gi_418930544-330492-349212	hallmark;refseq	42;41;1;	Viruses;dsDNA viruses no RNA stage;Caudovirales;Siphoviridae;unknown;unknown	Bacteria;Firmicutes;Bacilli;Bacillales;Staphylococcaceae;Staphylococcus	Staphylococcus aureus subsp. aureus CIG1750	prophage	linear	Cluster_8
Bacilli_gi_418931127-754-10388	hallmark;refseq	23;20;2;1	Viruses;dsDNA viruses no RNA stage;Caudovirales;Siphoviridae;unclassified;unknown	Bacteria;Firmicutes;Bacilli;Bacillales;Staphylococcaceae;Staphylococcus	Staphylococcus aureus subsp. aureus CIG1750	prophage	linear	Cluster_8
Bacilli_gi_418931725	hallmark;refseq	36;31;2;3	Viruses;dsDNA viruses no RNA stage;Caudovirales;Siphoviridae;unclassified;unknown	Bacteria;Firmicutes;Bacilli;Bacillales;Staphylococcaceae;Staphylococcus	Staphylococcus aureus subsp. aureus CIG1750	extrachromosomal	linear	Cluster_6
Bacilli_gi_418933447-548605-592002	hallmark;refseq	68;63;4;1	Viruses;dsDNA viruses no RNA stage;Caudovirales;Siphoviridae;unclassified;unknown	Bacteria;Firmicutes;Bacilli;Bacillales;Staphylococcaceae;Staphylococcus	Staphylococcus aureus subsp. aureus CIGC128	prophage	linear	Cluster_8
Bacilli_gi_418934214-220028-266180	hallmark;refseq	67;64;3;	Viruses;dsDNA viruses no RNA stage;Caudovirales;Siphoviridae;unclassified;unknown	Bacteria;Firmicutes;Bacilli;Bacillales;Staphylococcaceae;Staphylococcus	Staphylococcus aureus subsp. aureus CIGC128	prophage	linear	Cluster_6
Bacilli_gi_418946888	hallmark;refseq	41;39;2;	Viruses;dsDNA viruses no RNA stage;Caudovirales;Siphoviridae;unclassified;unknown	Bacteria;Firmicutes;Bacilli;Bacillales;Staphylococcaceae;Staphylococcus	Staphylococcus aureus subsp. aureus IS-157	extrachromosomal	linear	Cluster_40
Bacilli_gi_418947426	hallmark;refseq	18;17;1;	Viruses;dsDNA viruses no RNA stage;Caudovirales;Siphoviridae;unclassified;unknown	Bacteria;Firmicutes;Bacilli;Bacillales;Staphylococcaceae;Staphylococcus	Staphylococcus aureus subsp. aureus IS-157	extrachromosomal	linear	Cluster_56
Bacilli_gi_418949194-44861-72515	hallmark;refseq	32;32;;	Viruses;dsDNA viruses no RNA stage;Caudovirales;Siphoviridae;unclassified;unknown	Bacteria;Firmicutes;Bacilli;Bacillales;Staphylococcaceae;Staphylococcus	Staphylococcus aureus subsp. aureus IS-157	prophage	linear	Cluster_35
Bacilli_gi_418950604	hallmark;refseq	44;43;1;	Viruses;dsDNA viruses no RNA stage;Caudovirales;Siphoviridae;unknown;unknown	Bacteria;Firmicutes;Bacilli;Bacillales;Staphylococcaceae;Staphylococcus	Staphylococcus aureus subsp. aureus IS-160	extrachromosomal	linear	Cluster_40
Bacilli_gi_418953429-35776-64130	hallmark;refseq	36;35;1;	Viruses;dsDNA viruses no RNA stage;Caudovirales;Siphoviridae;unclassified;unknown	Bacteria;Firmicutes;Bacilli;Bacillales;Staphylococcaceae;Staphylococcus	Staphylococcus aureus subsp. aureus IS-189	prophage	linear	Cluster_35
Bacilli_gi_418954000	refseq	61;17;7;37	Viruses;dsDNA viruses no RNA stage;Caudovirales;unclassified;unclassified;unknown	Bacteria;Firmicutes;Bacilli;Bacillales;Staphylococcaceae;Staphylococcus	Staphylococcus aureus subsp. aureus IS-189	extrachromosomal	linear	Cluster_194
Bacilli_gi_418954259	hallmark;refseq	22;21;1;	Viruses;dsDNA viruses no RNA stage;Caudovirales;Siphoviridae;Lambdalikevirus;unknown	Bacteria;Firmicutes;Bacilli;Bacillales;Staphylococcaceae;Staphylococcus	Staphylococcus aureus subsp. aureus IS-189	extrachromosomal	linear	Cluster_56
Bacilli_gi_418954614	hallmark;refseq	44;41;3;	Viruses;dsDNA viruses no RNA stage;Caudovirales;Siphoviridae;unclassified;unknown	Bacteria;Firmicutes;Bacilli;Bacillales;Staphylococcaceae;Staphylococcus	Staphylococcus aureus subsp. aureus IS-189	extrachromosomal	linear	Cluster_40
Bacilli_gi_418964126	hallmark;refseq	19;12;4;3	Viruses;dsDNA viruses no RNA stage;Caudovirales;Siphoviridae;unclassified;unknown	Bacteria;Firmicutes;Bacilli;Lactobacillales;Streptococcaceae;Streptococcus	Streptococcus anginosus subsp. whileyi CCUG 39159	extrachromosomal	linear	Cluster_20
Bacilli_gi_418972756	hallmark;refseq	30;24;1;5	Viruses;dsDNA viruses no RNA stage;Caudovirales;Siphoviridae;unknown;unknown	Bacteria;Firmicutes;Bacilli;Lactobacillales;Streptococcaceae;Streptococcus	Streptococcus pseudopneumoniae ATCC BAA-960	extrachromosomal	linear	Cluster_30
Bacilli_gi_418973915	hallmark;refseq	30;21;4;5	Viruses;dsDNA viruses no RNA stage;Caudovirales;Siphoviridae;unknown;unknown	Bacteria;Firmicutes;Bacilli;Lactobacillales;Streptococcaceae;Streptococcus	Streptococcus pseudopneumoniae ATCC BAA-960	extrachromosomal	linear	Cluster_50
Bacilli_gi_418978086-86937-134553	hallmark;refseq	66;64;2;	Viruses;dsDNA viruses no RNA stage;Caudovirales;Siphoviridae;unclassified;unknown	Bacteria;Firmicutes;Bacilli;Bacillales;Staphylococcaceae;Staphylococcus	Staphylococcus aureus subsp. aureus DR10	prophage	linear	Cluster_6
Bacilli_gi_418982038-444418-491672	hallmark;refseq	68;64;4;	Viruses;dsDNA viruses no RNA stage;Caudovirales;Siphoviridae;unclassified;unknown	Bacteria;Firmicutes;Bacilli;Bacillales;Staphylococcaceae;Staphylococcus	Staphylococcus aureus subsp. aureus CIG1242	prophage	linear	Cluster_6
Bacilli_gi_418983774-105903-125738	hallmark;refseq	23;23;;	Viruses;dsDNA viruses no RNA stage;Caudovirales;Siphoviridae;unclassified;unknown	Bacteria;Firmicutes;Bacilli;Bacillales;Staphylococcaceae;Staphylococcus	Staphylococcus aureus subsp. aureus CIG1500	prophage	linear	Cluster_49
Bacilli_gi_418985638-0-42458	hallmark;refseq	71;64;5;2	Viruses;dsDNA viruses no RNA stage;Caudovirales;Siphoviridae;unclassified;unknown	Bacteria;Firmicutes;Bacilli;Bacillales;Staphylococcaceae;Staphylococcus	Staphylococcus aureus subsp. aureus CIG1500	prophage	linear	Cluster_8
Bacilli_gi_418985638-486624-529999	hallmark;refseq	64;60;4;	Viruses;dsDNA viruses no RNA stage;Caudovirales;Siphoviridae;unclassified;unknown	Bacteria;Firmicutes;Bacilli;Bacillales;Staphylococcaceae;Staphylococcus	Staphylococcus aureus subsp. aureus CIG1500	prophage	linear	Cluster_6
Bacilli_gi_418988425-98510-144543	hallmark;refseq	65;62;2;1	Viruses;dsDNA viruses no RNA stage;Caudovirales;Siphoviridae;unclassified;unknown	Bacteria;Firmicutes;Bacilli;Bacillales;Staphylococcaceae;Staphylococcus	Staphylococcus aureus subsp. aureus CIG1835	prophage	linear	Cluster_6
Bacilli_gi_418990410-1012793-1058714	hallmark;refseq	68;63;5;	Viruses;dsDNA viruses no RNA stage;Caudovirales;Siphoviridae;unclassified;unknown	Bacteria;Firmicutes;Bacilli;Bacillales;Staphylococcaceae;Staphylococcus	Staphylococcus aureus subsp. aureus CIG1096	prophage	linear	Cluster_6
Bacilli_gi_418993954-235323-279724	hallmark;refseq	63;58;5;	Viruses;dsDNA viruses no RNA stage;Caudovirales;Siphoviridae;unclassified;unknown	Bacteria;Firmicutes;Bacilli;Bacillales;Staphylococcaceae;Staphylococcus	Staphylococcus aureus subsp. aureus CIG290	prophage	linear	Cluster_6
Bacilli_gi_419433482-306698-344906	hallmark;refseq	52;51;1;	Viruses;dsDNA viruses no RNA stage;Caudovirales;Siphoviridae;unclassified;unknown	Bacteria;Firmicutes;Bacilli;Lactobacillales;Streptococcaceae;Streptococcus	Streptococcus pneumoniae GA40183	prophage	linear	Cluster_52
Bacilli_gi_419452187-8514-43604	hallmark;refseq	54;43;4;7	Viruses;dsDNA viruses no RNA stage;Caudovirales;Siphoviridae;unclassified;unknown	Bacteria;Firmicutes;Bacilli;Lactobacillales;Streptococcaceae;Streptococcus	Streptococcus pneumoniae EU-NP03	prophage	linear	Cluster_31
Bacilli_gi_419456576	refseq	22;13;4;5	Viruses;dsDNA viruses no RNA stage;Caudovirales;Siphoviridae;unknown;unknown	Bacteria;Firmicutes;Bacilli;Lactobacillales;Streptococcaceae;Streptococcus	Streptococcus pneumoniae GA02254	extrachromosomal	linear	Cluster_31
Bacilli_gi_419458823	hallmark;refseq	52;36;6;10	Viruses;dsDNA viruses no RNA stage;Caudovirales;Siphoviridae;unknown;unknown	Bacteria;Firmicutes;Bacilli;Lactobacillales;Streptococcaceae;Streptococcus	Streptococcus pneumoniae GA02270	extrachromosomal	linear	Cluster_30
Bacilli_gi_419461106	hallmark;refseq	43;28;5;10	Viruses;dsDNA viruses no RNA stage;Caudovirales;Siphoviridae;unknown;unknown	Bacteria;Firmicutes;Bacilli;Lactobacillales;Streptococcaceae;Streptococcus	Streptococcus pneumoniae GA02714	extrachromosomal	linear	Cluster_30
Bacilli_gi_419464821-108742-146749	hallmark;refseq	51;50;1;	Viruses;dsDNA viruses no RNA stage;Caudovirales;Siphoviridae;C2likevirus;unknown	Bacteria;Firmicutes;Bacilli;Lactobacillales;Streptococcaceae;Streptococcus	Streptococcus pneumoniae GA04175	prophage	linear	Cluster_52
Bacilli_gi_419467498-0-26468	hallmark;refseq	45;38;1;6	Viruses;dsDNA viruses no RNA stage;Caudovirales;Siphoviridae;unclassified;unknown	Bacteria;Firmicutes;Bacilli;Lactobacillales;Streptococcaceae;Streptococcus	Streptococcus pneumoniae GA05248	prophage	linear	Cluster_31
Bacilli_gi_419476384-0-21347	hallmark;refseq;vdb	40;26;2;12	Viruses;dsDNA viruses no RNA stage;Caudovirales;Siphoviridae;unclassified;unclassified	Bacteria;Firmicutes;Bacilli;Lactobacillales;Streptococcaceae;Streptococcus	Streptococcus pneumoniae GA14688	prophage	linear	Cluster_50
Bacilli_gi_419476656	hallmark;refseq	21;13;2;6	Viruses;dsDNA viruses no RNA stage;Caudovirales;Siphoviridae;unknown;unknown	Bacteria;Firmicutes;Bacilli;Lactobacillales;Streptococcaceae;Streptococcus	Streptococcus pneumoniae GA14688	extrachromosomal	linear	Cluster_50
Bacilli_gi_419491786	hallmark;refseq	24;16;2;6	Viruses;dsDNA viruses no RNA stage;Caudovirales;Siphoviridae;unknown;unknown	Bacteria;Firmicutes;Bacilli;Lactobacillales;Streptococcaceae;Streptococcus	Streptococcus pneumoniae GA47179	extrachromosomal	linear	Cluster_30
Bacilli_gi_419511444	hallmark;refseq	14;13;1;	Viruses;dsDNA viruses no RNA stage;Caudovirales;Siphoviridae;unknown;unknown	Bacteria;Firmicutes;Bacilli;Lactobacillales;Streptococcaceae;Streptococcus	Streptococcus pneumoniae GA05578	extrachromosomal	linear	Cluster_31
Bacilli_gi_419511460	refseq	16;10;1;5	Viruses;unclassified;unclassified;unclassified;unclassified;unclassified	Bacteria;Firmicutes;Bacilli;Lactobacillales;Streptococcaceae;Streptococcus	Streptococcus pneumoniae GA05578	extrachromosomal	linear	Cluster_31
Bacilli_gi_419524742	hallmark;refseq	42;28;5;9	Viruses;dsDNA viruses no RNA stage;Caudovirales;Siphoviridae;unknown;unknown	Bacteria;Firmicutes;Bacilli;Lactobacillales;Streptococcaceae;Streptococcus	Streptococcus pneumoniae GA14373	extrachromosomal	linear	Cluster_30
Bacilli_gi_419757567	hallmark;refseq	54;24;8;22	Viruses;dsDNA viruses no RNA stage;Caudovirales;Siphoviridae;unknown;unknown	Bacteria;Firmicutes;Bacilli;Lactobacillales;Leuconostocaceae;Oenococcus	Oenococcus oeni AWRIB304	extrachromosomal	circular	Cluster_32
Bacilli_gi_419759047	refseq	19;12;;7	Viruses;dsDNA viruses no RNA stage;Caudovirales;Siphoviridae;unknown;unknown	Bacteria;Firmicutes;Bacilli;Lactobacillales;Leuconostocaceae;Oenococcus	Oenococcus oeni AWRIB304	extrachromosomal	linear	Cluster_32
Bacilli_gi_419759068	hallmark;refseq	11;6;;5	Viruses;dsDNA viruses no RNA stage;Caudovirales;Siphoviridae;unknown;unknown	Bacteria;Firmicutes;Bacilli;Lactobacillales;Leuconostocaceae;Oenococcus	Oenococcus oeni AWRIB304	extrachromosomal	linear	Cluster_32
Bacilli_gi_419759083	hallmark;refseq	19;11;4;4	Viruses;dsDNA viruses no RNA stage;Caudovirales;Siphoviridae;unknown;unknown	Bacteria;Firmicutes;Bacilli;Lactobacillales;Leuconostocaceae;Oenococcus	Oenococcus oeni AWRIB304	extrachromosomal	linear	Cluster_32
Bacilli_gi_419767764	hallmark;refseq	23;18;2;3	Viruses;dsDNA viruses no RNA stage;Caudovirales;Siphoviridae;unknown;unknown	Bacteria;Firmicutes;Bacilli;Lactobacillales;Streptococcaceae;Streptococcus	Streptococcus mitis SK579	extrachromosomal	linear	Cluster_143
Bacilli_gi_419767788	hallmark	19;8;5;6	Viruses;dsDNA viruses no RNA stage;Caudovirales;Siphoviridae;unknown;unknown	Bacteria;Firmicutes;Bacilli;Lactobacillales;Streptococcaceae;Streptococcus	Streptococcus mitis SK579	extrachromosomal	linear	Cluster_52
Bacilli_gi_419768752	hallmark;refseq	67;60;3;4	Viruses;dsDNA viruses no RNA stage;Caudovirales;Siphoviridae;unclassified;unclassified	Bacteria;Firmicutes;Bacilli;Bacillales;Staphylococcaceae;Staphylococcus	Staphylococcus epidermidis IS-250	extrachromosomal	linear	Cluster_8
Bacilli_gi_419774929	hallmark;refseq	54;49;4;1	Viruses;dsDNA viruses no RNA stage;Caudovirales;Siphoviridae;unknown;unknown	Bacteria;Firmicutes;Bacilli;Bacillales;Staphylococcaceae;Staphylococcus	Staphylococcus aureus subsp. aureus CO-23	extrachromosomal	linear	Cluster_40
Bacilli_gi_419775070	hallmark;refseq	49;47;2;	Viruses;dsDNA viruses no RNA stage;Caudovirales;Siphoviridae;unknown;unknown	Bacteria;Firmicutes;Bacilli;Bacillales;Staphylococcaceae;Staphylococcus	Staphylococcus aureus subsp. aureus CO-23	extrachromosomal	linear	Cluster_6
Bacilli_gi_419785735	hallmark;refseq	38;36;2;	Viruses;dsDNA viruses no RNA stage;Caudovirales;Siphoviridae;unclassified;unknown	Bacteria;Firmicutes;Bacilli;Bacillales;Staphylococcaceae;Staphylococcus	Staphylococcus aureus subsp. aureus IS-M	extrachromosomal	linear	Cluster_6
Bacilli_gi_419786064	refseq	35;29;5;1	Viruses;dsDNA viruses no RNA stage;Caudovirales;Siphoviridae;unknown;unknown	Bacteria;Firmicutes;Bacilli;Bacillales;Staphylococcaceae;Staphylococcus	Staphylococcus aureus subsp. aureus IS-M	extrachromosomal	linear	Cluster_6
Bacilli_gi_419786154	hallmark;refseq	33;32;;1	Viruses;dsDNA viruses no RNA stage;Caudovirales;Siphoviridae;unknown;unknown	Bacteria;Firmicutes;Bacilli;Bacillales;Staphylococcaceae;Staphylococcus	Staphylococcus aureus subsp. aureus IS-M	extrachromosomal	linear	Cluster_40
Bacilli_gi_419800480-51741-91277	hallmark;refseq	55;39;1;15	Viruses;dsDNA viruses no RNA stage;Caudovirales;Siphoviridae;unknown;unknown	Bacteria;Firmicutes;Bacilli;Lactobacillales;Streptococcaceae;Streptococcus	Streptococcus parasanguinis F0449	prophage	linear	Cluster_88
Bacilli_gi_419815797-18564-51428	hallmark;refseq	34;23;3;8	Viruses;dsDNA viruses no RNA stage;Caudovirales;Siphoviridae;unknown;unknown	Bacteria;Firmicutes;Bacilli;Lactobacillales;Streptococcaceae;Streptococcus	Streptococcus sp. GMD2S	prophage	linear	Cluster_20
Bacilli_gi_419819195-18643-51507	hallmark;refseq	34;23;3;8	Viruses;dsDNA viruses no RNA stage;Caudovirales;Siphoviridae;unknown;unknown	Bacteria;Firmicutes;Bacilli;Lactobacillales;Streptococcaceae;Streptococcus	Streptococcus sp. GMD4S	prophage	linear	Cluster_20
Bacilli_gi_419856271	hallmark;refseq	22;13;3;6	Viruses;dsDNA viruses no RNA stage;Caudovirales;Siphoviridae;unknown;unknown	Bacteria;Firmicutes;Bacilli;Lactobacillales;Leuconostocaceae;Oenococcus	Oenococcus oeni AWRIB202	extrachromosomal	linear	Cluster_32
Bacilli_gi_419856838	hallmark;refseq	21;13;3;5	Viruses;dsDNA viruses no RNA stage;Caudovirales;Siphoviridae;unknown;unknown	Bacteria;Firmicutes;Bacilli;Lactobacillales;Leuconostocaceae;Oenococcus	Oenococcus oeni AWRIB202	extrachromosomal	linear	Cluster_32
Bacilli_gi_420145258	hallmark	78;26;5;47	Viruses;dsDNA viruses no RNA stage;Caudovirales;Siphoviridae;unknown;unknown	Bacteria;Firmicutes;Bacilli;Lactobacillales;Lactobacillaceae;Lactobacillus	Lactobacillus coryniformis subsp. coryniformis CECT 5711	extrachromosomal	linear	Cluster_565
Bacilli_gi_420163024-321145-357961	hallmark;refseq	50;37;1;12	Viruses;dsDNA viruses no RNA stage;Caudovirales;Siphoviridae;Lambdalikevirus;unknown	Bacteria;Firmicutes;Bacilli;Bacillales;Staphylococcaceae;Staphylococcus	Staphylococcus epidermidis NIHLM095	prophage	linear	Cluster_6
Bacilli_gi_420167530-156173-192990	hallmark;refseq	49;36;1;12	Viruses;dsDNA viruses no RNA stage;Caudovirales;Siphoviridae;Lambdalikevirus;unknown	Bacteria;Firmicutes;Bacilli;Bacillales;Staphylococcaceae;Staphylococcus	Staphylococcus epidermidis NIHLM087	prophage	linear	Cluster_6
Bacilli_gi_420172277	hallmark;refseq	70;62;3;5	Viruses;dsDNA viruses no RNA stage;Caudovirales;Siphoviridae;unclassified;unclassified	Bacteria;Firmicutes;Bacilli;Bacillales;Staphylococcaceae;Staphylococcus	Staphylococcus epidermidis NIHLM067	extrachromosomal	linear	Cluster_8
Bacilli_gi_420182616-41694-83385	hallmark;refseq	69;60;4;5	Viruses;dsDNA viruses no RNA stage;Caudovirales;Siphoviridae;unknown;unknown	Bacteria;Firmicutes;Bacilli;Bacillales;Staphylococcaceae;Staphylococcus	Staphylococcus epidermidis NIHLM049	prophage	linear	Cluster_8
Bacilli_gi_420216378-0-39145	hallmark;refseq	69;58;3;8	Viruses;dsDNA viruses no RNA stage;Caudovirales;Siphoviridae;unclassified;unknown	Bacteria;Firmicutes;Bacilli;Bacillales;Staphylococcaceae;Staphylococcus	Staphylococcus epidermidis NIH05001	prophage	linear	Cluster_6
Bacilli_gi_420218063-0-39510	hallmark;refseq	63;55;5;3	Viruses;dsDNA viruses no RNA stage;Caudovirales;Siphoviridae;unclassified;unclassified	Bacteria;Firmicutes;Bacilli;Bacillales;Staphylococcaceae;Staphylococcus	Staphylococcus epidermidis NIH05001	prophage	linear	Cluster_8
Bacilli_gi_420218610	hallmark;refseq	27;21;;6	Viruses;dsDNA viruses no RNA stage;Caudovirales;Siphoviridae;Lambdalikevirus;unknown	Bacteria;Firmicutes;Bacilli;Bacillales;Staphylococcaceae;Staphylococcus	Staphylococcus epidermidis NIH04008	extrachromosomal	linear	Cluster_6
Bacilli_gi_420219255	hallmark;refseq	25;14;1;10	Viruses;dsDNA viruses no RNA stage;Caudovirales;Siphoviridae;unknown;unknown	Bacteria;Firmicutes;Bacilli;Bacillales;Staphylococcaceae;Staphylococcus	Staphylococcus epidermidis NIH04008	extrachromosomal	linear	Cluster_257
Bacilli_gi_420219606	refseq	15;9;1;5	Viruses;dsDNA viruses no RNA stage;Caudovirales;Siphoviridae;Spbetalikevirus;unknown	Bacteria;Firmicutes;Bacilli;Bacillales;Staphylococcaceae;Staphylococcus	Staphylococcus epidermidis NIH04008	extrachromosomal	linear	Cluster_471
Bacilli_gi_420220190-3871-46499	hallmark;refseq	73;61;4;8	Viruses;dsDNA viruses no RNA stage;Caudovirales;Siphoviridae;unknown;unknown	Bacteria;Firmicutes;Bacilli;Bacillales;Staphylococcaceae;Staphylococcus	Staphylococcus epidermidis NIH04008	prophage	linear	Cluster_8
Bacilli_gi_420225008-3736-45574	hallmark;refseq	68;61;4;3	Viruses;dsDNA viruses no RNA stage;Caudovirales;Siphoviridae;unclassified;unclassified	Bacteria;Firmicutes;Bacilli;Bacillales;Staphylococcaceae;Staphylococcus	Staphylococcus epidermidis NIH06004	prophage	linear	Cluster_8
Bacilli_gi_420231795	hallmark;refseq	22;15;2;5	Viruses;dsDNA viruses no RNA stage;Caudovirales;Siphoviridae;Lambdalikevirus;unknown	Bacteria;Firmicutes;Bacilli;Bacillales;Staphylococcaceae;Staphylococcus	Staphylococcus epidermidis NIH051668	extrachromosomal	linear	Cluster_6
Bacilli_gi_420233404	refseq	60;17;6;37	Viruses;dsDNA viruses no RNA stage;Caudovirales;unclassified;unclassified;unknown	Bacteria;Firmicutes;Bacilli;Bacillales;Staphylococcaceae;Staphylococcus	Staphylococcus epidermidis NIH051668	extrachromosomal	linear	Cluster_194
Bacilli_gi_420233465	refseq	50;23;4;23	Viruses;dsDNA viruses no RNA stage;Caudovirales;Siphoviridae;Spbetalikevirus;unknown	Bacteria;Firmicutes;Bacilli;Bacillales;Staphylococcaceae;Staphylococcus	Staphylococcus epidermidis NIH051668	extrachromosomal	linear	Cluster_211
Bacilli_gi_420265149	hallmark;refseq	24;21;1;2	Viruses;dsDNA viruses no RNA stage;Caudovirales;Siphoviridae;unclassified;unknown	Bacteria;Firmicutes;Bacilli;Lactobacillales;Lactobacillaceae;Lactobacillus	Lactobacillus mali KCTC 3596 = DSM 20444	extrachromosomal	linear	Cluster_289
Bacilli_gi_420265558	hallmark;refseq	21;14;3;4	Viruses;dsDNA viruses no RNA stage;Caudovirales;Siphoviridae;unclassified;unknown	Bacteria;Firmicutes;Bacilli;Lactobacillales;Lactobacillaceae;Lactobacillus	Lactobacillus mali KCTC 3596 = DSM 20444	extrachromosomal	linear	Cluster_32
Bacilli_gi_420266791	hallmark;refseq	17;14;2;1	Viruses;dsDNA viruses no RNA stage;Caudovirales;Siphoviridae;unknown;unknown	Bacteria;Firmicutes;Bacilli;Lactobacillales;Lactobacillaceae;Lactobacillus	Lactobacillus mali KCTC 3596 = DSM 20444	extrachromosomal	linear	Cluster_52
Bacilli_gi_421147537-68568-104677	hallmark;refseq	49;37;2;10	Viruses;dsDNA viruses no RNA stage;Caudovirales;Siphoviridae;unknown;unknown	Bacteria;Firmicutes;Bacilli;Lactobacillales;Streptococcaceae;Streptococcus	Streptococcus agalactiae GB00112	prophage	linear	Cluster_88
Bacilli_gi_421150017-104330-146395	hallmark;refseq	65;64;1;	Viruses;dsDNA viruses no RNA stage;Caudovirales;Siphoviridae;unclassified;unknown	Bacteria;Firmicutes;Bacilli;Bacillales;Staphylococcaceae;Staphylococcus	Staphylococcus aureus subsp. aureus str. Newbould 305	prophage	linear	Cluster_8
Bacilli_gi_421192230	hallmark;refseq	119;53;29;37	Viruses;dsDNA viruses no RNA stage;Caudovirales;Siphoviridae;unknown;unknown	Bacteria;Firmicutes;Bacilli;Lactobacillales;Leuconostocaceae;Oenococcus	Oenococcus oeni AWRIB548	extrachromosomal	linear	Cluster_32
Bacilli_gi_421207796	hallmark;refseq	26;16;1;9	Viruses;dsDNA viruses no RNA stage;Caudovirales;Siphoviridae;unknown;unknown	Bacteria;Firmicutes;Bacilli;Lactobacillales;Streptococcaceae;Streptococcus	Streptococcus pneumoniae 2090008	extrachromosomal	linear	Cluster_17
Bacilli_gi_421208975	hallmark	19;7;3;9	Viruses;dsDNA viruses no RNA stage;Caudovirales;Siphoviridae;unknown;unknown	Bacteria;Firmicutes;Bacilli;Lactobacillales;Streptococcaceae;Streptococcus	Streptococcus pneumoniae 2070005	extrachromosomal	linear	Cluster_469
Bacilli_gi_421209991-6314-37991	hallmark;refseq;vdb	43;29;5;9	Viruses;dsDNA viruses no RNA stage;Caudovirales;Siphoviridae;unknown;unknown	Bacteria;Firmicutes;Bacilli;Lactobacillales;Streptococcaceae;Streptococcus	Streptococcus pneumoniae 2070035	prophage	linear	Cluster_30
Bacilli_gi_421219160	hallmark;refseq	36;25;1;10	Viruses;dsDNA viruses no RNA stage;Caudovirales;Siphoviridae;unknown;unknown	Bacteria;Firmicutes;Bacilli;Lactobacillales;Streptococcaceae;Streptococcus	Streptococcus pneumoniae 2070335	extrachromosomal	linear	Cluster_57
Bacilli_gi_421221512	hallmark;refseq	18;12;1;5	Viruses;dsDNA viruses no RNA stage;Caudovirales;Siphoviridae;unclassified;unknown	Bacteria;Firmicutes;Bacilli;Lactobacillales;Streptococcaceae;Streptococcus	Streptococcus pneumoniae 2070425	extrachromosomal	linear	Cluster_50
Bacilli_gi_421221530	hallmark;refseq	45;36;2;7	Viruses;dsDNA viruses no RNA stage;Caudovirales;Siphoviridae;unknown;unknown	Bacteria;Firmicutes;Bacilli;Lactobacillales;Streptococcaceae;Streptococcus	Streptococcus pneumoniae 2070425	extrachromosomal	linear	Cluster_30
Bacilli_gi_421223748	refseq	24;17;2;5	Viruses;dsDNA viruses no RNA stage;Caudovirales;Siphoviridae;unknown;unknown	Bacteria;Firmicutes;Bacilli;Lactobacillales;Streptococcaceae;Streptococcus	Streptococcus pneumoniae 2070531	extrachromosomal	linear	Cluster_50
Bacilli_gi_421223772	refseq	26;13;4;9	Viruses;unclassified;unclassified;unclassified;unclassified;unclassified	Bacteria;Firmicutes;Bacilli;Lactobacillales;Streptococcaceae;Streptococcus	Streptococcus pneumoniae 2070531	extrachromosomal	linear	Cluster_50
Bacilli_gi_421226164	hallmark	20;7;3;10	Viruses;dsDNA viruses no RNA stage;Caudovirales;Siphoviridae;unknown;unknown	Bacteria;Firmicutes;Bacilli;Lactobacillales;Streptococcaceae;Streptococcus	Streptococcus pneumoniae 2070768	extrachromosomal	linear	Cluster_469
Bacilli_gi_421228548	hallmark;refseq	68;44;5;19	Viruses;dsDNA viruses no RNA stage;Caudovirales;Siphoviridae;unknown;unknown	Bacteria;Firmicutes;Bacilli;Lactobacillales;Streptococcaceae;Streptococcus	Streptococcus pneumoniae 2072047	extrachromosomal	linear	Cluster_50
Bacilli_gi_421230819	hallmark;refseq	26;17;1;8	Viruses;dsDNA viruses no RNA stage;Caudovirales;Siphoviridae;unknown;unknown	Bacteria;Firmicutes;Bacilli;Lactobacillales;Streptococcaceae;Streptococcus	Streptococcus pneumoniae 2061376	extrachromosomal	linear	Cluster_17
Bacilli_gi_421232949	hallmark;refseq	50;38;4;8	Viruses;dsDNA viruses no RNA stage;Caudovirales;Siphoviridae;unclassified;unknown	Bacteria;Firmicutes;Bacilli;Lactobacillales;Streptococcaceae;Streptococcus	Streptococcus pneumoniae 2080076	extrachromosomal	linear	Cluster_31
Bacilli_gi_421235103-11785-51629	hallmark;refseq	57;42;3;12	Viruses;dsDNA viruses no RNA stage;Caudovirales;Siphoviridae;unknown;unknown	Bacteria;Firmicutes;Bacilli;Lactobacillales;Streptococcaceae;Streptococcus	Streptococcus pneumoniae 2061617	prophage	linear	Cluster_31
Bacilli_gi_421237372	hallmark;refseq	60;32;5;23	Viruses;dsDNA viruses no RNA stage;Caudovirales;Siphoviridae;unknown;unknown	Bacteria;Firmicutes;Bacilli;Lactobacillales;Streptococcaceae;Streptococcus	Streptococcus pneumoniae 2071004	extrachromosomal	linear	Cluster_50
Bacilli_gi_421237437	hallmark;refseq	47;37;3;7	Viruses;dsDNA viruses no RNA stage;Caudovirales;Siphoviridae;unclassified;unknown	Bacteria;Firmicutes;Bacilli;Lactobacillales;Streptococcaceae;Streptococcus	Streptococcus pneumoniae 2071247	extrachromosomal	linear	Cluster_31
Bacilli_gi_421241725	hallmark;refseq	50;35;3;12	Viruses;dsDNA viruses no RNA stage;Caudovirales;Siphoviridae;unknown;unknown	Bacteria;Firmicutes;Bacilli;Lactobacillales;Streptococcaceae;Streptococcus	Streptococcus pneumoniae 2080913	extrachromosomal	linear	Cluster_50
Bacilli_gi_421281395-108743-146282	hallmark;refseq	52;51;1;	Viruses;dsDNA viruses no RNA stage;Caudovirales;Siphoviridae;unclassified;unknown	Bacteria;Firmicutes;Bacilli;Lactobacillales;Streptococcaceae;Streptococcus	Streptococcus pneumoniae GA04672	prophage	linear	Cluster_52
Bacilli_gi_421288669-8414-15109	refseq	14;9;;5	Viruses;dsDNA viruses no RNA stage;Caudovirales;Siphoviridae;unknown;unknown	Bacteria;Firmicutes;Bacilli;Lactobacillales;Streptococcaceae;Streptococcus	Streptococcus pneumoniae GA54354	prophage	linear	Cluster_30
Bacilli_gi_421291971-20337-47087	hallmark;refseq	36;24;3;9	Viruses;dsDNA viruses no RNA stage;Caudovirales;Siphoviridae;unknown;unknown	Bacteria;Firmicutes;Bacilli;Lactobacillales;Streptococcaceae;Streptococcus	Streptococcus pneumoniae GA56348	prophage	linear	Cluster_487
Bacilli_gi_421303949	hallmark;refseq	42;28;3;11	Viruses;dsDNA viruses no RNA stage;Caudovirales;Siphoviridae;unknown;unknown	Bacteria;Firmicutes;Bacilli;Lactobacillales;Streptococcaceae;Streptococcus	Streptococcus pneumoniae GA62331	extrachromosomal	linear	Cluster_30
Bacilli_gi_421305463-0-41015	hallmark;refseq	60;42;4;14	Viruses;dsDNA viruses no RNA stage;Caudovirales;Siphoviridae;unknown;unknown	Bacteria;Firmicutes;Bacilli;Lactobacillales;Streptococcaceae;Streptococcus	Streptococcus pneumoniae GA62331	prophage	linear	Cluster_50
Bacilli_gi_421310660	refseq	15;11;1;3	Viruses;dsDNA viruses no RNA stage;Caudovirales;Siphoviridae;unknown;unknown	Bacteria;Firmicutes;Bacilli;Lactobacillales;Streptococcaceae;Streptococcus	Streptococcus pneumoniae GA62681	extrachromosomal	linear	Cluster_31
Bacilli_gi_421311788-118037-144785	hallmark;refseq	37;24;4;9	Viruses;dsDNA viruses no RNA stage;Caudovirales;Siphoviridae;unknown;unknown	Bacteria;Firmicutes;Bacilli;Lactobacillales;Streptococcaceae;Streptococcus	Streptococcus pneumoniae GA58981	prophage	linear	Cluster_487
Bacilli_gi_421489513-66758-103300	hallmark;refseq	56;48;3;5	Viruses;dsDNA viruses no RNA stage;Caudovirales;Siphoviridae;unknown;unknown	Bacteria;Firmicutes;Bacilli;Lactobacillales;Streptococcaceae;Streptococcus	Streptococcus anginosus SK1138	prophage	linear	Cluster_52
Bacilli_gi_421512330	hallmark;refseq	21;11;2;8	Viruses;dsDNA viruses no RNA stage;Caudovirales;Siphoviridae;Lambdalikevirus;unknown	Bacteria;Firmicutes;Bacilli;Lactobacillales;Enterococcaceae;Enterococcus	Enterococcus faecalis ATCC 29212	extrachromosomal	linear	Cluster_222
Bacilli_gi_421512733	hallmark;refseq	22;15;3;4	Viruses;unclassified;unclassified;unclassified;unclassified;unknown	Bacteria;Firmicutes;Bacilli;Lactobacillales;Enterococcaceae;Enterococcus	Enterococcus faecalis ATCC 29212	extrachromosomal	linear	Cluster_145
Bacilli_gi_421766543	hallmark;refseq	21;18;;3	Viruses;dsDNA viruses no RNA stage;Caudovirales;Siphoviridae;unknown;unknown	Bacteria;Firmicutes;Bacilli;Lactobacillales;Streptococcaceae;Lactococcus	Lactococcus garvieae DCC43	extrachromosomal	linear	Cluster_30
Bacilli_gi_421767366	hallmark;refseq	26;24;1;1	Viruses;dsDNA viruses no RNA stage;Caudovirales;Siphoviridae;unknown;unknown	Bacteria;Firmicutes;Bacilli;Lactobacillales;Streptococcaceae;Lactococcus	Lactococcus garvieae DCC43	extrachromosomal	linear	Cluster_57
Bacilli_gi_421767858	hallmark;refseq	28;17;4;7	Viruses;dsDNA viruses no RNA stage;Caudovirales;Siphoviridae;unknown;unknown	Bacteria;Firmicutes;Bacilli;Lactobacillales;Streptococcaceae;Lactococcus	Lactococcus garvieae DCC43	extrachromosomal	linear	Cluster_356
Bacilli_gi_421858131	hallmark;refseq	17;12;1;4	Viruses;dsDNA viruses no RNA stage;Caudovirales;Siphoviridae;Lambdalikevirus;unknown	Bacteria;Firmicutes;Bacilli;Bacillales;Paenibacillaceae;Paenibacillus	Paenibacillus popilliae ATCC 14706	extrachromosomal	linear	Cluster_42
Bacilli_gi_421859220	hallmark;refseq	18;14;1;3	Viruses;dsDNA viruses no RNA stage;Caudovirales;Myoviridae;unknown;unknown	Bacteria;Firmicutes;Bacilli;Bacillales;Paenibacillaceae;Paenibacillus	Paenibacillus popilliae ATCC 14706	extrachromosomal	linear	Cluster_15
Bacilli_gi_421859620	hallmark;refseq	32;21;2;9	Viruses;dsDNA viruses no RNA stage;Caudovirales;Siphoviridae;unknown;unknown	Bacteria;Firmicutes;Bacilli;Bacillales;Paenibacillaceae;Paenibacillus	Paenibacillus popilliae ATCC 14706	extrachromosomal	linear	Cluster_15
Bacilli_gi_421892111	hallmark;refseq	22;20;2;	Viruses;dsDNA viruses no RNA stage;Caudovirales;Siphoviridae;unknown;unknown	Bacteria;Firmicutes;Bacilli;Lactobacillales;Streptococcaceae;Streptococcus	Streptococcus pyogenes NS88.2	extrachromosomal	linear	Cluster_143
Bacilli_gi_422743901-102184-143684	hallmark;refseq	55;52;2;1	Viruses;dsDNA viruses no RNA stage;Caudovirales;Siphoviridae;unclassified;unknown	Bacteria;Firmicutes;Bacilli;Bacillales;Staphylococcaceae;Staphylococcus	Staphylococcus aureus subsp. aureus MRSA177	prophage	linear	Cluster_6
Bacilli_gi_422746016-196303-243376	hallmark;refseq	67;64;2;1	Viruses;dsDNA viruses no RNA stage;Caudovirales;Siphoviridae;unclassified;unknown	Bacteria;Firmicutes;Bacilli;Bacillales;Staphylococcaceae;Staphylococcus	Staphylococcus aureus subsp. aureus MRSA131	prophage	linear	Cluster_6
Bacilli_gi_422757969-1394223-1432038	hallmark;refseq	69;52;1;16	Viruses;unclassified;unclassified;unclassified;unknown;unknown	Bacteria;Firmicutes;Bacilli;Lactobacillales;Streptococcaceae;Streptococcus	Streptococcus dysgalactiae subsp. dysgalactiae ATCC 27957	prophage	linear	Cluster_57
Bacilli_gi_422757969-1724554-1772897	hallmark;refseq	74;53;6;15	Viruses;unclassified phages;;;unknown;unknown	Bacteria;Firmicutes;Bacilli;Lactobacillales;Streptococcaceae;Streptococcus	Streptococcus dysgalactiae subsp. dysgalactiae ATCC 27957	prophage	linear	Cluster_115
Bacilli_gi_423079685	hallmark;refseq	51;44;1;6	Viruses;dsDNA viruses no RNA stage;Caudovirales;Siphoviridae;unclassified;unknown	Bacteria;Firmicutes;Bacilli;Lactobacillales;Lactobacillaceae;Lactobacillus	Lactobacillus rhamnosus ATCC 21052	extrachromosomal	linear	Cluster_133
Bacilli_gi_423321503-348617-402292	hallmark;refseq	80;35;7;38	Viruses;dsDNA viruses no RNA stage;Caudovirales;Siphoviridae;unclassified;unknown	Bacteria;Firmicutes;Bacilli;Lactobacillales;Lactobacillaceae;Lactobacillus	Lactobacillus crispatus FB077-07	prophage	linear	Cluster_206
Bacilli_gi_423364338	hallmark	86;30;11;45	Viruses;dsDNA viruses no RNA stage;Caudovirales;Myoviridae;Punalikevirus;unknown	Bacteria;Firmicutes;Bacilli;Bacillales;Bacillaceae;Bacillus	Bacillus cereus VD022	extrachromosomal	linear	Cluster_150
Bacilli_gi_423364498	hallmark;refseq	72;25;12;35	Viruses;dsDNA viruses no RNA stage;Caudovirales;Siphoviridae;unknown;unknown	Bacteria;Firmicutes;Bacilli;Bacillales;Bacillaceae;Bacillus	Bacillus cereus VD022	extrachromosomal	linear	Cluster_423
Bacilli_gi_423364641	hallmark	58;15;5;38	Viruses;dsDNA viruses no RNA stage;Caudovirales;Siphoviridae;Lambdalikevirus;unknown	Bacteria;Firmicutes;Bacilli;Bacillales;Bacillaceae;Bacillus	Bacillus cereus VD022	extrachromosomal	linear	Cluster_365
Bacilli_gi_423364702	hallmark;vdb	28;10;;18	Viruses;dsDNA viruses no RNA stage;Caudovirales;Siphoviridae;unknown;unknown	Bacteria;Firmicutes;Bacilli;Bacillales;Bacillaceae;Bacillus	Bacillus cereus VD022	extrachromosomal	linear	Cluster_365
Bacilli_gi_423388038	hallmark;refseq	75;37;18;20	Viruses;dsDNA viruses no RNA stage;Caudovirales;Siphoviridae;unknown;unknown	Bacteria;Firmicutes;Bacilli;Bacillales;Bacillaceae;Bacillus	Bacillus cereus BAG1X1-2	extrachromosomal	linear	Cluster_186
Bacilli_gi_423399425	hallmark;refseq	83;43;14;26	Viruses;dsDNA viruses no RNA stage;Caudovirales;Siphoviridae;unknown;unknown	Bacteria;Firmicutes;Bacilli;Bacillales;Bacillaceae;Bacillus	Bacillus cereus BAG2X1-1	extrachromosomal	circular	Cluster_116
Bacilli_gi_423399602-2939316-2990500	hallmark;refseq	70;40;10;20	Viruses;dsDNA viruses no RNA stage;Caudovirales;Siphoviridae;unknown;unknown	Bacteria;Firmicutes;Bacilli;Bacillales;Bacillaceae;Bacillus	Bacillus cereus BAG2X1-2	prophage	linear	Cluster_76
Bacilli_gi_423405198	hallmark;refseq	76;48;7;21	Viruses;dsDNA viruses no RNA stage;Caudovirales;Siphoviridae;unknown;unknown	Bacteria;Firmicutes;Bacilli;Bacillales;Bacillaceae;Bacillus	Bacillus cereus BAG2X1-2	extrachromosomal	circular	Cluster_116
Bacilli_gi_423410568	hallmark;refseq	87;46;6;35	Viruses;dsDNA viruses no RNA stage;Caudovirales;Siphoviridae;unclassified;unknown	Bacteria;Firmicutes;Bacilli;Bacillales;Bacillaceae;Bacillus	Bacillus cereus BAG2X1-3	extrachromosomal	circular	Cluster_116
Bacilli_gi_423416314	hallmark;refseq	82;35;16;31	Viruses;dsDNA viruses no RNA stage;Caudovirales;Siphoviridae;unknown;unknown	Bacteria;Firmicutes;Bacilli;Bacillales;Bacillaceae;Bacillus	Bacillus cereus BAG3O-2	extrachromosomal	linear	Cluster_186
Bacilli_gi_423416397	hallmark;refseq	78;48;9;21	Viruses;dsDNA viruses no RNA stage;Caudovirales;Siphoviridae;unknown;unknown	Bacteria;Firmicutes;Bacilli;Bacillales;Bacillaceae;Bacillus	Bacillus cereus BAG3O-2	extrachromosomal	circular	Cluster_116
Bacilli_gi_423422311-2192763-2255576	hallmark;refseq	78;60;3;15	Viruses;dsDNA viruses no RNA stage;Caudovirales;Siphoviridae;unknown;unknown	Bacteria;Firmicutes;Bacilli;Bacillales;Bacillaceae;Bacillus	Bacillus cereus BAG3X2-2	prophage	linear	Cluster_308
Bacilli_gi_423427972	hallmark;refseq	84;38;17;29	Viruses;dsDNA viruses no RNA stage;Caudovirales;Siphoviridae;unknown;unknown	Bacteria;Firmicutes;Bacilli;Bacillales;Bacillaceae;Bacillus	Bacillus cereus BAG3X2-2	extrachromosomal	circular	Cluster_186
Bacilli_gi_423433709	hallmark;refseq	89;36;17;36	Viruses;dsDNA viruses no RNA stage;Caudovirales;Siphoviridae;unknown;unknown	Bacteria;Firmicutes;Bacilli;Bacillales;Bacillaceae;Bacillus	Bacillus cereus BAG4O-1	extrachromosomal	linear	Cluster_186
Bacilli_gi_423445290	hallmark;refseq	68;35;1;32	Viruses;dsDNA viruses no RNA stage;Caudovirales;Siphoviridae;unclassified;unknown	Bacteria;Firmicutes;Bacilli;Bacillales;Bacillaceae;Bacillus	Bacillus cereus BAG4X2-1	extrachromosomal	circular	Cluster_119
Bacilli_gi_423468587	hallmark;refseq	81;40;11;30	Viruses;dsDNA viruses no RNA stage;Caudovirales;Siphoviridae;Lambdalikevirus;unknown	Bacteria;Firmicutes;Bacilli;Bacillales;Bacillaceae;Bacillus	Bacillus cereus BAG6O-1	extrachromosomal	circular	Cluster_116
Bacilli_gi_423480041	hallmark;refseq	101;30;28;43	Viruses;dsDNA viruses no RNA stage;Caudovirales;Siphoviridae;unknown;unknown	Bacteria;Firmicutes;Bacilli;Bacillales;Bacillaceae;Bacillus	Bacillus cereus BAG6X1-1	extrachromosomal	linear	Cluster_268
Bacilli_gi_423490892	hallmark;refseq	72;38;14;20	Viruses;dsDNA viruses no RNA stage;Caudovirales;Siphoviridae;unknown;unknown	Bacteria;Firmicutes;Bacilli;Bacillales;Bacillaceae;Bacillus	Bacillus cereus BtB2-4	extrachromosomal	linear	Cluster_135
Bacilli_gi_423490981	hallmark;refseq	79;37;;42	Viruses;dsDNA viruses no RNA stage;Caudovirales;Siphoviridae;unclassified;unclassified	Bacteria;Firmicutes;Bacilli;Bacillales;Bacillaceae;Bacillus	Bacillus cereus BtB2-4	extrachromosomal	circular	Cluster_192
Bacilli_gi_423496617	hallmark;refseq	101;60;17;24	Viruses;dsDNA viruses no RNA stage;Caudovirales;Siphoviridae;unknown;unknown	Bacteria;Firmicutes;Bacilli;Bacillales;Bacillaceae;Bacillus	Bacillus cereus CER057	extrachromosomal	linear	Cluster_135
Bacilli_gi_423502290	hallmark;refseq	70;37;13;20	Viruses;dsDNA viruses no RNA stage;Caudovirales;Siphoviridae;unknown;unknown	Bacteria;Firmicutes;Bacilli;Bacillales;Bacillaceae;Bacillus	Bacillus cereus CER074	extrachromosomal	circular	Cluster_135
Bacilli_gi_423508375	refseq	13;12;1;	Viruses;dsDNA viruses no RNA stage;Caudovirales;Siphoviridae;unknown;unknown	Bacteria;Firmicutes;Bacilli;Bacillales;Bacillaceae;Bacillus	Bacillus cereus HD73	extrachromosomal	linear	Cluster_55
Bacilli_gi_423532033	hallmark;refseq	85;35;16;34	Viruses;dsDNA viruses no RNA stage;Caudovirales;Siphoviridae;unknown;unknown	Bacteria;Firmicutes;Bacilli;Bacillales;Bacillaceae;Bacillus	Bacillus cereus HuB1-1	extrachromosomal	linear	Cluster_186
Bacilli_gi_423549186	hallmark;refseq	83;48;10;25	Viruses;dsDNA viruses no RNA stage;Caudovirales;Siphoviridae;unknown;unknown	Bacteria;Firmicutes;Bacilli;Bacillales;Bacillaceae;Bacillus	Bacillus cereus HuB5-5	extrachromosomal	circular	Cluster_135
Bacilli_gi_423549292	hallmark;refseq	30;18;2;10	Viruses;dsDNA viruses no RNA stage;Caudovirales;Siphoviridae;unknown;unknown	Bacteria;Firmicutes;Bacilli;Bacillales;Bacillaceae;Bacillus	Bacillus cereus HuB5-5	extrachromosomal	circular	Cluster_135
Bacilli_gi_423560503	hallmark;refseq	53;28;4;21	Viruses;dsDNA viruses no RNA stage;Caudovirales;Siphoviridae;unknown;unknown	Bacteria;Firmicutes;Bacilli;Bacillales;Bacillaceae;Bacillus	Bacillus cereus MC67	extrachromosomal	linear	Cluster_135
Bacilli_gi_423560596-2938638-2975754	hallmark;refseq	58;54;;4	Viruses;dsDNA viruses no RNA stage;Caudovirales;Siphoviridae;unknown;unknown	Bacteria;Firmicutes;Bacilli;Bacillales;Bacillaceae;Bacillus	Bacillus cereus MSX-A1	prophage	linear	Cluster_290
Bacilli_gi_423560596-4340049-4380676	hallmark;refseq	48;26;6;16	Viruses;dsDNA viruses no RNA stage;Caudovirales;unclassified;unclassified;unknown	Bacteria;Firmicutes;Bacilli;Bacillales;Bacillaceae;Bacillus	Bacillus cereus MSX-A1	prophage	linear	Cluster_241
Bacilli_gi_423572409	hallmark;refseq	27;26;1;	Viruses;dsDNA viruses no RNA stage;Caudovirales;Siphoviridae;unknown;unknown	Bacteria;Firmicutes;Bacilli;Bacillales;Bacillaceae;Bacillus	Bacillus cereus MSX-A12	extrachromosomal	linear	Cluster_135
Bacilli_gi_423572483	refseq	29;28;;1	Viruses;dsDNA viruses no RNA stage;Caudovirales;Siphoviridae;unknown;unknown	Bacteria;Firmicutes;Bacilli;Bacillales;Bacillaceae;Bacillus	Bacillus cereus MSX-A12	extrachromosomal	linear	Cluster_116
Bacilli_gi_423572779-4730538-4764456	hallmark;refseq	52;33;4;15	Viruses;dsDNA viruses no RNA stage;Caudovirales;Siphoviridae;unknown;unknown	Bacteria;Firmicutes;Bacilli;Bacillales;Bacillaceae;Bacillus	Bacillus cereus MSX-D12	prophage	linear	Cluster_119
Bacilli_gi_423584588-368833-409419	hallmark;refseq	60;49;2;9	Viruses;dsDNA viruses no RNA stage;Caudovirales;Siphoviridae;unknown;unknown	Bacteria;Firmicutes;Bacilli;Bacillales;Bacillaceae;Bacillus	Bacillus cereus VD045	prophage	linear	Cluster_55
Bacilli_gi_424772886-28233-72014	hallmark;refseq	72;69;3;	Viruses;dsDNA viruses no RNA stage;Caudovirales;Siphoviridae;unclassified;unknown	Bacteria;Firmicutes;Bacilli;Bacillales;Staphylococcaceae;Staphylococcus	Staphylococcus aureus subsp. aureus CM05	prophage	linear	Cluster_35
Bacilli_gi_42518084-1292528-1330402	hallmark;refseq	55;51;;4	Viruses;dsDNA viruses no RNA stage;Caudovirales;Siphoviridae;unknown;unknown	Bacteria;Firmicutes;Bacilli;Lactobacillales;Lactobacillaceae;Lactobacillus	Lactobacillus johnsonii NCC 533	prophage	linear	Cluster_474
Bacilli_gi_425736919-157078-193613	hallmark;refseq	53;37;2;14	Viruses;dsDNA viruses no RNA stage;Caudovirales;Siphoviridae;unclassified;unknown	Bacteria;Firmicutes;Bacilli;Bacillales;Staphylococcaceae;Staphylococcus	Staphylococcus massiliensis S46	prophage	linear	Cluster_40
Bacilli_gi_425738963	hallmark;refseq	14;7;4;3	Viruses;dsDNA viruses no RNA stage;Caudovirales;Siphoviridae;Lambdalikevirus;unknown	Bacteria;Firmicutes;Bacilli;Bacillales;Staphylococcaceae;Staphylococcus	Staphylococcus massiliensis S46	extrachromosomal	linear	Cluster_161
Bacilli_gi_427394458	hallmark;refseq	18;16;;2	Viruses;dsDNA viruses no RNA stage;Caudovirales;Siphoviridae;unclassified;unknown	Bacteria;Firmicutes;Bacilli;Lactobacillales;Carnobacteriaceae;Alloiococcus	Alloiococcus otitis ATCC 51267	extrachromosomal	linear	Cluster_41
Bacilli_gi_427441627	hallmark;refseq	60;37;1;22	Viruses;dsDNA viruses no RNA stage;Caudovirales;Siphoviridae;unknown;unknown	Bacteria;Firmicutes;Bacilli;Lactobacillales;Lactobacillaceae;Pediococcus	Pediococcus lolii NGRI 0510Q	extrachromosomal	linear	Cluster_159
Bacilli_gi_428765681-1849705-1891283	hallmark;refseq	62;61;;1	Viruses;dsDNA viruses no RNA stage;Caudovirales;Siphoviridae;unknown;unknown	Bacteria;Firmicutes;Bacilli;Lactobacillales;Enterococcaceae;Enterococcus	Enterococcus faecalis str. Symbioflor 1	prophage	linear	Cluster_41
Bacilli_gi_429204493	hallmark;refseq	47;30;3;14	Viruses;dsDNA viruses no RNA stage;Caudovirales;Siphoviridae;unclassified;unknown	Bacteria;Firmicutes;Bacilli;Lactobacillales;Lactobacillaceae;Lactobacillus	Lactobacillus saerimneri 30a	extrachromosomal	linear	Cluster_399
Bacilli_gi_430356286-17-14694	hallmark;refseq	16;11;4;1	Viruses;dsDNA viruses no RNA stage;Caudovirales;unclassified;unclassified;unknown	Bacteria;Firmicutes;Bacilli;Lactobacillales;Enterococcaceae;Enterococcus	Enterococcus faecalis OG1X	prophage	linear	Cluster_41
Bacilli_gi_430369546-17-14695	hallmark;refseq	16;11;4;1	Viruses;dsDNA viruses no RNA stage;Caudovirales;unclassified;unclassified;unknown	Bacteria;Firmicutes;Bacilli;Lactobacillales;Enterococcaceae;Enterococcus	Enterococcus faecalis M7	prophage	linear	Cluster_41
Bacilli_gi_433542171	hallmark;refseq	16;13;2;1	Viruses;dsDNA viruses no RNA stage;Caudovirales;Siphoviridae;Lambdalikevirus;unknown	Bacteria;Firmicutes;Bacilli;Bacillales;Paenibacillaceae;Brevibacillus	Brevibacillus agri BAB-2500	extrachromosomal	linear	Cluster_55
Bacilli_gi_433544975	refseq	17;10;1;6	Viruses;dsDNA viruses no RNA stage;Caudovirales;Siphoviridae;unknown;unknown	Bacteria;Firmicutes;Bacilli;Bacillales;Paenibacillaceae;Brevibacillus	Brevibacillus agri BAB-2500	extrachromosomal	linear	Cluster_17
Bacilli_gi_433547270	hallmark;refseq	76;25;12;39	Viruses;dsDNA viruses no RNA stage;Caudovirales;Siphoviridae;Lambdalikevirus;unknown	Bacteria;Firmicutes;Bacilli;Bacillales;Paenibacillaceae;Brevibacillus	Brevibacillus agri BAB-2500	extrachromosomal	linear	Cluster_105
Bacilli_gi_434373506-3050122-3090701	hallmark;refseq	58;33;9;16	Viruses;unclassified;unclassified;unclassified;unknown;unknown	Bacteria;Firmicutes;Bacilli;Bacillales;Bacillaceae;Bacillus	Bacillus thuringiensis HD-789	prophage	linear	Cluster_241
Bacilli_gi_434373506-3817766-3858377	hallmark;refseq	48;27;5;16	Viruses;dsDNA viruses no RNA stage;Caudovirales;unclassified;unknown;unknown	Bacteria;Firmicutes;Bacilli;Bacillales;Bacillaceae;Bacillus	Bacillus thuringiensis HD-789	prophage	linear	Cluster_241
Bacilli_gi_440706325	hallmark;refseq	29;28;1;	Viruses;dsDNA viruses no RNA stage;Caudovirales;Siphoviridae;Lambdalikevirus;unknown	Bacteria;Firmicutes;Bacilli;Bacillales;Staphylococcaceae;Staphylococcus	Staphylococcus aureus subsp. aureus 21282	extrachromosomal	linear	Cluster_8
Bacilli_gi_440706401	hallmark;refseq	51;48;2;1	Viruses;dsDNA viruses no RNA stage;Caudovirales;Siphoviridae;unknown;unknown	Bacteria;Firmicutes;Bacilli;Bacillales;Staphylococcaceae;Staphylococcus	Staphylococcus aureus subsp. aureus 21282	extrachromosomal	linear	Cluster_40
Bacilli_gi_440707089	hallmark;refseq	21;21;;	Viruses;dsDNA viruses no RNA stage;Caudovirales;Siphoviridae;unknown;unknown	Bacteria;Firmicutes;Bacilli;Bacillales;Staphylococcaceae;Staphylococcus	Staphylococcus aureus subsp. aureus 21282	extrachromosomal	linear	Cluster_49
Bacilli_gi_440708296	refseq	27;15;9;3	Viruses;dsDNA viruses no RNA stage;unclassified;unclassified;unknown;unknown	Bacteria;Firmicutes;Bacilli;Bacillales;Staphylococcaceae;Staphylococcus	Staphylococcus aureus subsp. aureus 21282	extrachromosomal	linear	Cluster_254
Bacilli_gi_443637144	hallmark;refseq	35;35;;	Viruses;dsDNA viruses no RNA stage;Caudovirales;Siphoviridae;unknown;unknown	Bacteria;Firmicutes;Bacilli;Bacillales;Staphylococcaceae;Staphylococcus	Staphylococcus aureus subsp. aureus 21236	extrachromosomal	linear	Cluster_56
Bacilli_gi_443637600	hallmark;refseq	37;36;1;	Viruses;dsDNA viruses no RNA stage;Caudovirales;Siphoviridae;unclassified;unknown	Bacteria;Firmicutes;Bacilli;Bacillales;Staphylococcaceae;Staphylococcus	Staphylococcus aureus subsp. aureus 21236	extrachromosomal	linear	Cluster_8
Bacilli_gi_443637869	hallmark;refseq	65;61;3;1	Viruses;dsDNA viruses no RNA stage;Caudovirales;Siphoviridae;unknown;unknown	Bacteria;Firmicutes;Bacilli;Bacillales;Staphylococcaceae;Staphylococcus	Staphylococcus aureus subsp. aureus 21196	extrachromosomal	linear	Cluster_56
Bacilli_gi_444891724-1663358-1699962	hallmark;refseq	60;47;4;9	Viruses;dsDNA viruses no RNA stage;Caudovirales;Siphoviridae;unclassified;unknown	Bacteria;Firmicutes;Bacilli;Lactobacillales;Streptococcaceae;Streptococcus	Streptococcus pneumoniae PCS70012	prophage	linear	Cluster_31
Bacilli_gi_444891813	hallmark;refseq	66;47;10;9	Viruses;dsDNA viruses no RNA stage;Caudovirales;Siphoviridae;unclassified;unknown	Bacteria;Firmicutes;Bacilli;Lactobacillales;Streptococcaceae;Streptococcus	Streptococcus pneumoniae PCS81218	extrachromosomal	linear	Cluster_31
Bacilli_gi_444892102-4544-41147	hallmark;refseq	60;47;4;9	Viruses;dsDNA viruses no RNA stage;Caudovirales;Siphoviridae;unclassified;unknown	Bacteria;Firmicutes;Bacilli;Lactobacillales;Streptococcaceae;Streptococcus	Streptococcus pneumoniae PNI0006	prophage	linear	Cluster_31
Bacilli_gi_444892229-0-19408	hallmark;refseq	42;30;3;9	Viruses;dsDNA viruses no RNA stage;Caudovirales;Siphoviridae;unclassified;unknown	Bacteria;Firmicutes;Bacilli;Lactobacillales;Streptococcaceae;Streptococcus	Streptococcus pneumoniae PNI0007	prophage	linear	Cluster_31
Bacilli_gi_444893116-93-38687	hallmark;refseq	62;47;5;10	Viruses;dsDNA viruses no RNA stage;Caudovirales;Siphoviridae;unclassified;unknown	Bacteria;Firmicutes;Bacilli;Lactobacillales;Streptococcaceae;Streptococcus	Streptococcus pneumoniae PNI0009	prophage	linear	Cluster_31
Bacilli_gi_444893195-172842-209448	hallmark;refseq	60;47;4;9	Viruses;dsDNA viruses no RNA stage;Caudovirales;Siphoviridae;unclassified;unknown	Bacteria;Firmicutes;Bacilli;Lactobacillales;Streptococcaceae;Streptococcus	Streptococcus pneumoniae PNI0010	prophage	linear	Cluster_31
Bacilli_gi_444893273	hallmark;refseq	51;37;4;10	Viruses;dsDNA viruses no RNA stage;Caudovirales;Siphoviridae;unclassified;unknown	Bacteria;Firmicutes;Bacilli;Lactobacillales;Streptococcaceae;Streptococcus	Streptococcus pneumoniae PNI0076	extrachromosomal	linear	Cluster_31
Bacilli_gi_444893437	hallmark;refseq	66;47;10;9	Viruses;dsDNA viruses no RNA stage;Caudovirales;Siphoviridae;unclassified;unknown	Bacteria;Firmicutes;Bacilli;Lactobacillales;Streptococcaceae;Streptococcus	Streptococcus pneumoniae PNI0360	extrachromosomal	linear	Cluster_31
Bacilli_gi_444897497	hallmark;refseq	60;44;7;9	Viruses;dsDNA viruses no RNA stage;Caudovirales;Siphoviridae;unclassified;unknown	Bacteria;Firmicutes;Bacilli;Lactobacillales;Streptococcaceae;Streptococcus	Streptococcus pneumoniae PNI0427	extrachromosomal	linear	Cluster_31
Bacilli_gi_444897776	refseq	20;10;4;6	Viruses;dsDNA viruses no RNA stage;Caudovirales;Siphoviridae;unknown;unknown	Bacteria;Firmicutes;Bacilli;Lactobacillales;Streptococcaceae;Streptococcus	Streptococcus pneumoniae PNI0446	extrachromosomal	linear	Cluster_31
Bacilli_gi_445070017-335640-372244	hallmark;refseq	61;48;4;9	Viruses;dsDNA viruses no RNA stage;Caudovirales;Siphoviridae;unclassified;unknown	Bacteria;Firmicutes;Bacilli;Lactobacillales;Streptococcaceae;Streptococcus	Streptococcus pneumoniae PNI0153	prophage	linear	Cluster_31
Bacilli_gi_445070857	hallmark;refseq	58;44;4;10	Viruses;dsDNA viruses no RNA stage;Caudovirales;Siphoviridae;unclassified;unknown	Bacteria;Firmicutes;Bacilli;Lactobacillales;Streptococcaceae;Streptococcus	Streptococcus pneumoniae PNI0199	extrachromosomal	linear	Cluster_31
Bacilli_gi_448741607-45152-79085	hallmark;refseq	40;38;1;1	Viruses;dsDNA viruses no RNA stage;Caudovirales;Siphoviridae;unclassified;unknown	Bacteria;Firmicutes;Bacilli;Bacillales;Staphylococcaceae;Staphylococcus	Staphylococcus aureus KT/314250	prophage	linear	Cluster_6
Bacilli_gi_448741692	hallmark;refseq	35;34;1;	Viruses;dsDNA viruses no RNA stage;Caudovirales;Siphoviridae;unclassified;unknown	Bacteria;Firmicutes;Bacilli;Bacillales;Staphylococcaceae;Staphylococcus	Staphylococcus aureus KT/314250	extrachromosomal	linear	Cluster_35
Bacilli_gi_448879146-1659265-1699117	hallmark;refseq	60;46;4;10	Viruses;dsDNA viruses no RNA stage;Caudovirales;Siphoviridae;unknown;unknown	Bacteria;Firmicutes;Bacilli;Lactobacillales;Streptococcaceae;Streptococcus	Streptococcus sp. F0441	prophage	linear	Cluster_31
Bacilli_gi_448879149-252108-297819	hallmark;refseq	66;44;3;19	Viruses;dsDNA viruses no RNA stage;Caudovirales;Siphoviridae;unknown;unknown	Bacteria;Firmicutes;Bacilli;Lactobacillales;Streptococcaceae;Streptococcus	Streptococcus sp. F0442	prophage	linear	Cluster_31
Bacilli_gi_448879155	hallmark;refseq	42;17;10;15	Viruses;dsDNA viruses no RNA stage;Caudovirales;Siphoviridae;unknown;unknown	Bacteria;Firmicutes;Bacilli;Lactobacillales;Streptococcaceae;Streptococcus	Streptococcus urinalis FB127-CNA-2	extrachromosomal	linear	Cluster_20
Bacilli_gi_450065761-18938-58696	hallmark;refseq	49;40;2;7	Viruses;dsDNA viruses no RNA stage;Caudovirales;Siphoviridae;unknown;unknown	Bacteria;Firmicutes;Bacilli;Lactobacillales;Streptococcaceae;Streptococcus	Streptococcus mutans NLML9	prophage	linear	Cluster_32
Bacilli_gi_450082728	hallmark;refseq	28;24;2;2	Viruses;dsDNA viruses no RNA stage;Caudovirales;Siphoviridae;unknown;unknown	Bacteria;Firmicutes;Bacilli;Lactobacillales;Streptococcaceae;Streptococcus	Streptococcus mutans N66	extrachromosomal	linear	Cluster_32
Bacilli_gi_451952299	hallmark;refseq	31;18;8;5	Viruses;dsDNA viruses no RNA stage;Caudovirales;Siphoviridae;unknown;unknown	Bacteria;Firmicutes;Bacilli;Lactobacillales;Enterococcaceae;Enterococcus	Enterococcus sp. GMD3E	extrachromosomal	linear	Cluster_90
Bacilli_gi_452721209	refseq;vdb	19;10;4;5	Viruses;dsDNA viruses no RNA stage;Caudovirales;Siphoviridae;unknown;unknown	Bacteria;Firmicutes;Bacilli;Bacillales;Staphylococcaceae;Staphylococcus	Staphylococcus aureus subsp. aureus GR1	extrachromosomal	linear	Cluster_337
Bacilli_gi_452721217-29-29111	hallmark;refseq	36;35;;1	Viruses;dsDNA viruses no RNA stage;Caudovirales;Siphoviridae;unclassified;unknown	Bacteria;Firmicutes;Bacilli;Bacillales;Staphylococcaceae;Staphylococcus	Staphylococcus aureus subsp. aureus GR1	prophage	linear	Cluster_49
Bacilli_gi_452725555	hallmark;refseq	56;21;15;20	Viruses;dsDNA viruses no RNA stage;Caudovirales;Siphoviridae;unknown;unknown	Bacteria;Firmicutes;Bacilli;Lactobacillales;Streptococcaceae;Streptococcus	Streptococcus agalactiae FSL C1-494	extrachromosomal	linear	Cluster_20
Bacilli_gi_452725796	hallmark;refseq	58;22;14;22	Viruses;dsDNA viruses no RNA stage;Caudovirales;Siphoviridae;unclassified;unknown	Bacteria;Firmicutes;Bacilli;Lactobacillales;Streptococcaceae;Streptococcus	Streptococcus agalactiae FSL S3-603	extrachromosomal	linear	Cluster_20
Bacilli_gi_452725803	hallmark;refseq;vdb	30;20;5;5	Viruses;dsDNA viruses no RNA stage;Caudovirales;Siphoviridae;unknown;unknown	Bacteria;Firmicutes;Bacilli;Lactobacillales;Streptococcaceae;Streptococcus	Streptococcus agalactiae FSL S3-603	extrachromosomal	linear	Cluster_52
Bacilli_gi_452725808	hallmark;refseq	21;19;;2	Viruses;dsDNA viruses no RNA stage;Caudovirales;Siphoviridae;unknown;unknown	Bacteria;Firmicutes;Bacilli;Lactobacillales;Streptococcaceae;Streptococcus	Streptococcus agalactiae FSL S3-603	extrachromosomal	linear	Cluster_68
Bacilli_gi_452725916	hallmark;refseq	83;40;29;14	Viruses;dsDNA viruses no RNA stage;Caudovirales;Siphoviridae;unclassified;unknown	Bacteria;Firmicutes;Bacilli;Lactobacillales;Streptococcaceae;Streptococcus	Streptococcus agalactiae FSL S3-003	extrachromosomal	linear	Cluster_65
Bacilli_gi_452726033-41981-81552	hallmark;refseq	60;43;4;13	Viruses;unclassified;unclassified;unclassified;unclassified;unknown	Bacteria;Firmicutes;Bacilli;Lactobacillales;Streptococcaceae;Streptococcus	Streptococcus agalactiae CCUG 25532	prophage	linear	Cluster_65
Bacilli_gi_452726042-108192-148054	hallmark;refseq	53;39;4;10	Viruses;dsDNA viruses no RNA stage;Caudovirales;Siphoviridae;unknown;unknown	Bacteria;Firmicutes;Bacilli;Lactobacillales;Streptococcaceae;Streptococcus	Streptococcus agalactiae CCUG 25532	prophage	linear	Cluster_88
Bacilli_gi_452726130-29364-47853	refseq	38;20;3;15	Viruses;unclassified;unclassified;unclassified;unclassified;unclassified	Bacteria;Firmicutes;Bacilli;Lactobacillales;Streptococcaceae;Streptococcus	Streptococcus agalactiae CCUG 37737	prophage	linear	Cluster_65
Bacilli_gi_452726158-107824-145149	hallmark;refseq;vdb	63;36;10;17	Viruses;dsDNA viruses no RNA stage;Caudovirales;Siphoviridae;unclassified;unknown	Bacteria;Firmicutes;Bacilli;Lactobacillales;Streptococcaceae;Streptococcus	Streptococcus agalactiae CCUG 37738	prophage	linear	Cluster_62
Bacilli_gi_452726386-99653-138270	hallmark;refseq;vdb	68;42;7;19	Viruses;dsDNA viruses no RNA stage;Caudovirales;Siphoviridae;unclassified;unknown	Bacteria;Firmicutes;Bacilli;Lactobacillales;Streptococcaceae;Streptococcus	Streptococcus agalactiae CCUG 44077	prophage	linear	Cluster_62
Bacilli_gi_452726387	hallmark;refseq;vdb	18;11;5;2	Viruses;dsDNA viruses no RNA stage;Caudovirales;Siphoviridae;unclassified;unknown	Bacteria;Firmicutes;Bacilli;Lactobacillales;Streptococcaceae;Streptococcus	Streptococcus agalactiae CCUG 44077	extrachromosomal	linear	Cluster_20
Bacilli_gi_452726394	hallmark	29;10;7;12	Viruses;dsDNA viruses no RNA stage;Caudovirales;Siphoviridae;unclassified;unknown	Bacteria;Firmicutes;Bacilli;Lactobacillales;Streptococcaceae;Streptococcus	Streptococcus agalactiae CCUG 44077	extrachromosomal	linear	Cluster_20
Bacilli_gi_452726490	hallmark;refseq	50;32;6;12	Viruses;dsDNA viruses no RNA stage;Caudovirales;Siphoviridae;unknown;unknown	Bacteria;Firmicutes;Bacilli;Lactobacillales;Streptococcaceae;Streptococcus	Streptococcus agalactiae LMG 15091	extrachromosomal	linear	Cluster_166
Bacilli_gi_452726509-5707-45963	hallmark;refseq	61;38;3;20	Viruses;dsDNA viruses no RNA stage;Caudovirales;Siphoviridae;unclassified;unknown	Bacteria;Firmicutes;Bacilli;Lactobacillales;Streptococcaceae;Streptococcus	Streptococcus agalactiae LMG 15091	prophage	linear	Cluster_68
Bacilli_gi_452726573-10408-34786	hallmark;refseq	25;22;2;1	Viruses;dsDNA viruses no RNA stage;Caudovirales;Siphoviridae;unclassified;unknown	Bacteria;Firmicutes;Bacilli;Lactobacillales;Streptococcaceae;Streptococcus	Streptococcus agalactiae LMG 15092	prophage	linear	Cluster_30
Bacilli_gi_452726598	refseq	29;15;;14	Viruses;dsDNA viruses no RNA stage;Caudovirales;Siphoviridae;unknown;unknown	Bacteria;Firmicutes;Bacilli;Lactobacillales;Streptococcaceae;Streptococcus	Streptococcus agalactiae LMG 15092	extrachromosomal	linear	Cluster_68
Bacilli_gi_452726602	hallmark;refseq	19;15;1;3	Viruses;dsDNA viruses no RNA stage;Caudovirales;Siphoviridae;unknown;unknown	Bacteria;Firmicutes;Bacilli;Lactobacillales;Streptococcaceae;Streptococcus	Streptococcus agalactiae LMG 15092	extrachromosomal	linear	Cluster_57
Bacilli_gi_452726650	refseq	22;12;4;6	Viruses;dsDNA viruses no RNA stage;Caudovirales;Siphoviridae;unknown;unknown	Bacteria;Firmicutes;Bacilli;Lactobacillales;Streptococcaceae;Streptococcus	Streptococcus agalactiae LMG 15093	extrachromosomal	linear	Cluster_62
Bacilli_gi_452726651	hallmark;refseq	43;26;8;9	Viruses;dsDNA viruses no RNA stage;Caudovirales;Siphoviridae;unclassified;unknown	Bacteria;Firmicutes;Bacilli;Lactobacillales;Streptococcaceae;Streptococcus	Streptococcus agalactiae LMG 15093	extrachromosomal	linear	Cluster_62
Bacilli_gi_452726694	hallmark	21;9;2;10	Viruses;dsDNA viruses no RNA stage;Caudovirales;Siphoviridae;unknown;unknown	Bacteria;Firmicutes;Bacilli;Lactobacillales;Streptococcaceae;Streptococcus	Streptococcus agalactiae LMG 15093	extrachromosomal	linear	Cluster_30
Bacilli_gi_452727009-1609-45850	hallmark;refseq;vdb	73;45;8;20	Viruses;dsDNA viruses no RNA stage;Caudovirales;Siphoviridae;unclassified;unknown	Bacteria;Firmicutes;Bacilli;Lactobacillales;Streptococcaceae;Streptococcus	Streptococcus agalactiae BSU188	prophage	linear	Cluster_65
Bacilli_gi_452727111	hallmark;refseq	37;25;4;8	Viruses;dsDNA viruses no RNA stage;Caudovirales;Siphoviridae;C2likevirus;unknown	Bacteria;Firmicutes;Bacilli;Lactobacillales;Streptococcaceae;Streptococcus	Streptococcus agalactiae BSU178	extrachromosomal	linear	Cluster_62
Bacilli_gi_452727118	hallmark;refseq	44;20;12;12	Viruses;dsDNA viruses no RNA stage;Caudovirales;Siphoviridae;unclassified;unknown	Bacteria;Firmicutes;Bacilli;Lactobacillales;Streptococcaceae;Streptococcus	Streptococcus agalactiae BSU178	extrachromosomal	linear	Cluster_20
Bacilli_gi_452727152-47876-79937	hallmark;refseq	47;33;5;9	Viruses;dsDNA viruses no RNA stage;Caudovirales;Siphoviridae;unknown;unknown	Bacteria;Firmicutes;Bacilli;Lactobacillales;Streptococcaceae;Streptococcus	Streptococcus agalactiae BSU96	prophage	linear	Cluster_30
Bacilli_gi_452727184	refseq	23;16;;7	Viruses;dsDNA viruses no RNA stage;Caudovirales;Siphoviridae;unknown;unknown	Bacteria;Firmicutes;Bacilli;Lactobacillales;Streptococcaceae;Streptococcus	Streptococcus agalactiae BSU165	extrachromosomal	linear	Cluster_68
Bacilli_gi_452727197	hallmark;refseq	21;21;;	Viruses;dsDNA viruses no RNA stage;Caudovirales;Siphoviridae;unknown;unknown	Bacteria;Firmicutes;Bacilli;Lactobacillales;Streptococcaceae;Streptococcus	Streptococcus agalactiae BSU165	extrachromosomal	linear	Cluster_68
Bacilli_gi_452727198	hallmark;refseq	19;16;1;2	Viruses;dsDNA viruses no RNA stage;Caudovirales;Siphoviridae;unclassified;unknown	Bacteria;Firmicutes;Bacilli;Lactobacillales;Streptococcaceae;Streptococcus	Streptococcus agalactiae BSU165	extrachromosomal	linear	Cluster_361
Bacilli_gi_452727297	hallmark;refseq	17;17;;	Viruses;dsDNA viruses no RNA stage;Caudovirales;Siphoviridae;unknown;unknown	Bacteria;Firmicutes;Bacilli;Lactobacillales;Streptococcaceae;Streptococcus	Streptococcus agalactiae BSU167	extrachromosomal	linear	Cluster_68
Bacilli_gi_452727314	hallmark;refseq	74;37;20;17	Viruses;dsDNA viruses no RNA stage;Caudovirales;Siphoviridae;unclassified;unknown	Bacteria;Firmicutes;Bacilli;Lactobacillales;Streptococcaceae;Streptococcus	Streptococcus agalactiae BSU167	extrachromosomal	linear	Cluster_65
Bacilli_gi_452727506-2076-45570	hallmark;refseq	44;20;10;14	Viruses;dsDNA viruses no RNA stage;Caudovirales;Siphoviridae;unclassified;unknown	Bacteria;Firmicutes;Bacilli;Lactobacillales;Streptococcaceae;Streptococcus	Streptococcus agalactiae STIR-CD-21	prophage	linear	Cluster_20
Bacilli_gi_452727518-3040-44246	hallmark;refseq	52;25;13;14	Viruses;dsDNA viruses no RNA stage;Caudovirales;Siphoviridae;unclassified;unknown	Bacteria;Firmicutes;Bacilli;Lactobacillales;Streptococcaceae;Streptococcus	Streptococcus agalactiae STIR-CD-22	prophage	linear	Cluster_20
Bacilli_gi_452727572	refseq	12;7;3;2	Viruses;dsDNA viruses no RNA stage;Caudovirales;Siphoviridae;unclassified;unknown	Bacteria;Firmicutes;Bacilli;Lactobacillales;Streptococcaceae;Streptococcus	Streptococcus agalactiae STIR-CD-23	extrachromosomal	linear	Cluster_20
Bacilli_gi_452727694-2700-43806	hallmark;refseq	43;20;10;13	Viruses;dsDNA viruses no RNA stage;Caudovirales;Siphoviridae;unclassified;unknown	Bacteria;Firmicutes;Bacilli;Lactobacillales;Streptococcaceae;Streptococcus	Streptococcus agalactiae STIR-CD-27	prophage	linear	Cluster_20
Bacilli_gi_452727743	hallmark;refseq	41;19;11;11	Viruses;dsDNA viruses no RNA stage;Caudovirales;Siphoviridae;unclassified;unknown	Bacteria;Firmicutes;Bacilli;Lactobacillales;Streptococcaceae;Streptococcus	Streptococcus agalactiae STIR-CD-28	extrachromosomal	linear	Cluster_20
Bacilli_gi_452728166-2357-46245	hallmark;refseq	44;21;9;14	Viruses;dsDNA viruses no RNA stage;Caudovirales;Siphoviridae;unclassified;unknown	Bacteria;Firmicutes;Bacilli;Lactobacillales;Streptococcaceae;Streptococcus	Streptococcus agalactiae MRI Z1-211	prophage	linear	Cluster_20
Bacilli_gi_452728186	hallmark;refseq	39;17;10;12	Viruses;dsDNA viruses no RNA stage;Caudovirales;Siphoviridae;unclassified;unknown	Bacteria;Firmicutes;Bacilli;Lactobacillales;Streptococcaceae;Streptococcus	Streptococcus agalactiae MRI Z1-212	extrachromosomal	linear	Cluster_20
Bacilli_gi_452728242-0-44812	hallmark;refseq	50;21;11;18	Viruses;dsDNA viruses no RNA stage;Caudovirales;Siphoviridae;unknown;unknown	Bacteria;Firmicutes;Bacilli;Lactobacillales;Streptococcaceae;Streptococcus	Streptococcus agalactiae MRI Z1-213	prophage	linear	Cluster_20
Bacilli_gi_452728252	hallmark;refseq	24;16;5;3	Viruses;dsDNA viruses no RNA stage;Caudovirales;Siphoviridae;unclassified;unknown	Bacteria;Firmicutes;Bacilli;Lactobacillales;Streptococcaceae;Streptococcus	Streptococcus agalactiae MRI Z1-213	extrachromosomal	linear	Cluster_62
Bacilli_gi_452728317	hallmark;refseq	21;11;6;4	Viruses;dsDNA viruses no RNA stage;Caudovirales;Siphoviridae;unclassified;unknown	Bacteria;Firmicutes;Bacilli;Lactobacillales;Streptococcaceae;Streptococcus	Streptococcus agalactiae MRI Z1-214	extrachromosomal	linear	Cluster_20
Bacilli_gi_452728318	hallmark	33;10;8;15	Viruses;dsDNA viruses no RNA stage;Caudovirales;Siphoviridae;unknown;unknown	Bacteria;Firmicutes;Bacilli;Lactobacillales;Streptococcaceae;Streptococcus	Streptococcus agalactiae MRI Z1-214	extrachromosomal	linear	Cluster_20
Bacilli_gi_452728348	hallmark;refseq	57;40;5;12	Viruses;dsDNA viruses no RNA stage;Caudovirales;Siphoviridae;unclassified;unknown	Bacteria;Firmicutes;Bacilli;Lactobacillales;Streptococcaceae;Streptococcus	Streptococcus agalactiae MRI Z1-214	extrachromosomal	linear	Cluster_62
Bacilli_gi_452728466	hallmark;refseq	55;21;15;19	Viruses;dsDNA viruses no RNA stage;Caudovirales;Siphoviridae;unknown;unknown	Bacteria;Firmicutes;Bacilli;Lactobacillales;Streptococcaceae;Streptococcus	Streptococcus agalactiae MRI Z1-216	extrachromosomal	linear	Cluster_20
Bacilli_gi_452728534	hallmark;refseq	18;16;;2	Viruses;dsDNA viruses no RNA stage;Caudovirales;Siphoviridae;unknown;unknown	Bacteria;Firmicutes;Bacilli;Lactobacillales;Streptococcaceae;Streptococcus	Streptococcus agalactiae LDS 617	extrachromosomal	linear	Cluster_62
Bacilli_gi_452728584	hallmark;refseq	19;19;;	Viruses;dsDNA viruses no RNA stage;Caudovirales;Siphoviridae;unknown;unknown	Bacteria;Firmicutes;Bacilli;Lactobacillales;Streptococcaceae;Streptococcus	Streptococcus agalactiae LDS 617	extrachromosomal	linear	Cluster_68
Bacilli_gi_452728659	hallmark;refseq	56;23;12;21	Viruses;dsDNA viruses no RNA stage;Caudovirales;Siphoviridae;unknown;unknown	Bacteria;Firmicutes;Bacilli;Lactobacillales;Streptococcaceae;Streptococcus	Streptococcus agalactiae LDS 628	extrachromosomal	linear	Cluster_20
Bacilli_gi_452728672	hallmark;refseq	26;23;1;2	Viruses;dsDNA viruses no RNA stage;Caudovirales;Siphoviridae;unknown;unknown	Bacteria;Firmicutes;Bacilli;Lactobacillales;Streptococcaceae;Streptococcus	Streptococcus agalactiae LDS 628	extrachromosomal	linear	Cluster_68
Bacilli_gi_452728825	hallmark;refseq	50;21;13;16	Viruses;dsDNA viruses no RNA stage;Caudovirales;Siphoviridae;unclassified;unknown	Bacteria;Firmicutes;Bacilli;Lactobacillales;Streptococcaceae;Streptococcus	Streptococcus agalactiae str. Gottschalk 992B	extrachromosomal	linear	Cluster_20
Bacilli_gi_452728885-101911-133702	hallmark;refseq	47;33;5;9	Viruses;dsDNA viruses no RNA stage;Caudovirales;Siphoviridae;unknown;unknown	Bacteria;Firmicutes;Bacilli;Lactobacillales;Streptococcaceae;Streptococcus	Streptococcus agalactiae GB00003	prophage	linear	Cluster_30
Bacilli_gi_452728929	hallmark;refseq	50;21;14;15	Viruses;dsDNA viruses no RNA stage;Caudovirales;Siphoviridae;unclassified;unknown	Bacteria;Firmicutes;Bacilli;Lactobacillales;Streptococcaceae;Streptococcus	Streptococcus agalactiae GB00013	extrachromosomal	circular	Cluster_20
Bacilli_gi_452728962-1899-45787	hallmark;refseq	44;21;8;15	Viruses;dsDNA viruses no RNA stage;Caudovirales;Siphoviridae;unclassified;unknown	Bacteria;Firmicutes;Bacilli;Lactobacillales;Streptococcaceae;Streptococcus	Streptococcus agalactiae GB00020	prophage	linear	Cluster_20
Bacilli_gi_452729015	hallmark;refseq	52;21;14;17	Viruses;dsDNA viruses no RNA stage;Caudovirales;Siphoviridae;unclassified;unknown	Bacteria;Firmicutes;Bacilli;Lactobacillales;Streptococcaceae;Streptococcus	Streptococcus agalactiae GB00083	extrachromosomal	linear	Cluster_20
Bacilli_gi_452729028-1578-45466	hallmark;refseq	44;21;9;14	Viruses;dsDNA viruses no RNA stage;Caudovirales;Siphoviridae;unclassified;unknown	Bacteria;Firmicutes;Bacilli;Lactobacillales;Streptococcaceae;Streptococcus	Streptococcus agalactiae GB00084	prophage	linear	Cluster_20
Bacilli_gi_452729088	hallmark;refseq	40;29;5;6	Viruses;dsDNA viruses no RNA stage;Caudovirales;Siphoviridae;unclassified;unknown	Bacteria;Firmicutes;Bacilli;Lactobacillales;Streptococcaceae;Streptococcus	Streptococcus agalactiae GB00092	extrachromosomal	linear	Cluster_65
Bacilli_gi_452729151-20879-57652	hallmark;refseq;vdb	49;36;3;10	Viruses;dsDNA viruses no RNA stage;Caudovirales;Siphoviridae;unknown;unknown	Bacteria;Firmicutes;Bacilli;Lactobacillales;Streptococcaceae;Streptococcus	Streptococcus agalactiae GB00111	prophage	linear	Cluster_88
Bacilli_gi_452729177-68896-109233	hallmark;refseq	49;40;3;6	Viruses;dsDNA viruses no RNA stage;Caudovirales;Siphoviridae;unknown;unknown	Bacteria;Firmicutes;Bacilli;Lactobacillales;Streptococcaceae;Streptococcus	Streptococcus agalactiae GB00115	prophage	linear	Cluster_70
Bacilli_gi_452729336-26767-65244	hallmark;refseq	53;38;3;12	Viruses;dsDNA viruses no RNA stage;Caudovirales;Siphoviridae;unknown;unknown	Bacteria;Firmicutes;Bacilli;Lactobacillales;Streptococcaceae;Streptococcus	Streptococcus agalactiae GB00206	prophage	linear	Cluster_88
Bacilli_gi_452729338-45870-77661	hallmark;refseq	47;31;6;10	Viruses;dsDNA viruses no RNA stage;Caudovirales;Siphoviridae;unknown;unknown	Bacteria;Firmicutes;Bacilli;Lactobacillales;Streptococcaceae;Streptococcus	Streptococcus agalactiae GB00206	prophage	linear	Cluster_30
Bacilli_gi_452729404-7-41317	hallmark;refseq	66;43;9;14	Viruses;dsDNA viruses no RNA stage;Caudovirales;Siphoviridae;C2likevirus;unknown	Bacteria;Firmicutes;Bacilli;Lactobacillales;Streptococcaceae;Streptococcus	Streptococcus agalactiae GB00241	prophage	linear	Cluster_65
Bacilli_gi_452729407	hallmark;refseq	49;21;13;15	Viruses;dsDNA viruses no RNA stage;Caudovirales;Siphoviridae;unclassified;unknown	Bacteria;Firmicutes;Bacilli;Lactobacillales;Streptococcaceae;Streptococcus	Streptococcus agalactiae GB00241	extrachromosomal	linear	Cluster_20
Bacilli_gi_452729492-303-40638	hallmark;refseq	49;40;3;6	Viruses;dsDNA viruses no RNA stage;Caudovirales;Siphoviridae;unknown;unknown	Bacteria;Firmicutes;Bacilli;Lactobacillales;Streptococcaceae;Streptococcus	Streptococcus agalactiae GB00264	prophage	linear	Cluster_70
Bacilli_gi_452729518-90723-128125	hallmark;refseq;vdb	47;38;3;6	Viruses;dsDNA viruses no RNA stage;Caudovirales;Siphoviridae;unknown;unknown	Bacteria;Firmicutes;Bacilli;Lactobacillales;Streptococcaceae;Streptococcus	Streptococcus agalactiae GB00279	prophage	linear	Cluster_70
Bacilli_gi_452729520-4284-35745	hallmark;refseq	45;32;3;10	Viruses;dsDNA viruses no RNA stage;Caudovirales;Siphoviridae;unknown;unknown	Bacteria;Firmicutes;Bacilli;Lactobacillales;Streptococcaceae;Streptococcus	Streptococcus agalactiae GB00279	prophage	linear	Cluster_166
Bacilli_gi_452729546	hallmark;refseq	19;17;;2	Viruses;dsDNA viruses no RNA stage;Caudovirales;Siphoviridae;unknown;unknown	Bacteria;Firmicutes;Bacilli;Lactobacillales;Streptococcaceae;Streptococcus	Streptococcus agalactiae GB00300	extrachromosomal	linear	Cluster_30
Bacilli_gi_452729547	hallmark;refseq	29;23;2;4	Viruses;dsDNA viruses no RNA stage;Caudovirales;Siphoviridae;unclassified;unknown	Bacteria;Firmicutes;Bacilli;Lactobacillales;Streptococcaceae;Streptococcus	Streptococcus agalactiae GB00300	extrachromosomal	linear	Cluster_65
Bacilli_gi_452729603	hallmark;refseq	86;47;15;24	Viruses;dsDNA viruses no RNA stage;Caudovirales;Siphoviridae;unclassified;unknown	Bacteria;Firmicutes;Bacilli;Lactobacillales;Streptococcaceae;Streptococcus	Streptococcus agalactiae GB00543	extrachromosomal	linear	Cluster_65
Bacilli_gi_452729703-69077-105187	hallmark;refseq	50;38;2;10	Viruses;dsDNA viruses no RNA stage;Caudovirales;Siphoviridae;unknown;unknown	Bacteria;Firmicutes;Bacilli;Lactobacillales;Streptococcaceae;Streptococcus	Streptococcus agalactiae GB00557	prophage	linear	Cluster_88
Bacilli_gi_452729709	refseq	35;19;6;10	Viruses;dsDNA viruses no RNA stage;Caudovirales;Siphoviridae;unknown;unknown	Bacteria;Firmicutes;Bacilli;Lactobacillales;Streptococcaceae;Streptococcus	Streptococcus agalactiae GB00561	extrachromosomal	linear	Cluster_62
Bacilli_gi_452729710	hallmark;refseq	35;29;2;4	Viruses;dsDNA viruses no RNA stage;Caudovirales;Siphoviridae;unknown;unknown	Bacteria;Firmicutes;Bacilli;Lactobacillales;Streptococcaceae;Streptococcus	Streptococcus agalactiae GB00561	extrachromosomal	linear	Cluster_70
Bacilli_gi_452729736-118964-151191	hallmark;refseq	50;31;5;14	Viruses;dsDNA viruses no RNA stage;Caudovirales;Siphoviridae;unknown;unknown	Bacteria;Firmicutes;Bacilli;Lactobacillales;Streptococcaceae;Streptococcus	Streptococcus agalactiae GB00561	prophage	linear	Cluster_30
Bacilli_gi_452729747	hallmark;refseq	20;19;;1	Viruses;dsDNA viruses no RNA stage;Caudovirales;Siphoviridae;unknown;unknown	Bacteria;Firmicutes;Bacilli;Lactobacillales;Streptococcaceae;Streptococcus	Streptococcus agalactiae GB00561	extrachromosomal	linear	Cluster_68
Bacilli_gi_452729750	hallmark;refseq	20;16;1;3	Viruses;dsDNA viruses no RNA stage;Caudovirales;Siphoviridae;unclassified;unknown	Bacteria;Firmicutes;Bacilli;Lactobacillales;Streptococcaceae;Streptococcus	Streptococcus agalactiae GB00561	extrachromosomal	linear	Cluster_361
Bacilli_gi_452729793	hallmark;refseq;vdb	50;26;14;10	Viruses;dsDNA viruses no RNA stage;Caudovirales;Siphoviridae;unclassified;unknown	Bacteria;Firmicutes;Bacilli;Lactobacillales;Streptococcaceae;Streptococcus	Streptococcus agalactiae GB00601	extrachromosomal	linear	Cluster_62
Bacilli_gi_452729950-44885-78705	hallmark;refseq	48;33;6;9	Viruses;dsDNA viruses no RNA stage;Caudovirales;Siphoviridae;unknown;unknown	Bacteria;Firmicutes;Bacilli;Lactobacillales;Streptococcaceae;Streptococcus	Streptococcus agalactiae GB00654	prophage	linear	Cluster_30
Bacilli_gi_452729957-21553-57662	hallmark;refseq	49;37;2;10	Viruses;dsDNA viruses no RNA stage;Caudovirales;Siphoviridae;unknown;unknown	Bacteria;Firmicutes;Bacilli;Lactobacillales;Streptococcaceae;Streptococcus	Streptococcus agalactiae GB00654	prophage	linear	Cluster_88
Bacilli_gi_452730089	refseq	22;12;4;6	Viruses;dsDNA viruses no RNA stage;Caudovirales;Siphoviridae;unknown;unknown	Bacteria;Firmicutes;Bacilli;Lactobacillales;Streptococcaceae;Streptococcus	Streptococcus agalactiae GB00865	extrachromosomal	linear	Cluster_62
Bacilli_gi_452730094	hallmark;refseq	34;25;2;7	Viruses;dsDNA viruses no RNA stage;Caudovirales;Siphoviridae;unclassified;unknown	Bacteria;Firmicutes;Bacilli;Lactobacillales;Streptococcaceae;Streptococcus	Streptococcus agalactiae GB00865	extrachromosomal	linear	Cluster_361
Bacilli_gi_452730163	hallmark;refseq	17;16;;1	Viruses;dsDNA viruses no RNA stage;Caudovirales;Siphoviridae;unclassified;unknown	Bacteria;Firmicutes;Bacilli;Lactobacillales;Streptococcaceae;Streptococcus	Streptococcus agalactiae GB00874	extrachromosomal	linear	Cluster_197
Bacilli_gi_452730165-1863-45751	hallmark;refseq	44;21;9;14	Viruses;dsDNA viruses no RNA stage;Caudovirales;Siphoviridae;unclassified;unknown	Bacteria;Firmicutes;Bacilli;Lactobacillales;Streptococcaceae;Streptococcus	Streptococcus agalactiae GB00874	prophage	linear	Cluster_20
Bacilli_gi_452730166	hallmark;refseq	21;18;2;1	Viruses;dsDNA viruses no RNA stage;Caudovirales;Siphoviridae;unclassified;unknown	Bacteria;Firmicutes;Bacilli;Lactobacillales;Streptococcaceae;Streptococcus	Streptococcus agalactiae GB00874	extrachromosomal	linear	Cluster_65
Bacilli_gi_452730223-105117-150027	hallmark;refseq	72;47;6;19	Viruses;dsDNA viruses no RNA stage;Caudovirales;Siphoviridae;unclassified;unknown	Bacteria;Firmicutes;Bacilli;Lactobacillales;Streptococcaceae;Streptococcus	Streptococcus agalactiae GB00884	prophage	linear	Cluster_65
Bacilli_gi_452730244-19419-54919	hallmark;refseq;vdb	65;43;4;18	Viruses;dsDNA viruses no RNA stage;Caudovirales;Siphoviridae;unclassified;unknown	Bacteria;Firmicutes;Bacilli;Lactobacillales;Streptococcaceae;Streptococcus	Streptococcus agalactiae GB00887	prophage	linear	Cluster_65
Bacilli_gi_452730288-2237-45156	hallmark;refseq	46;24;9;13	Viruses;dsDNA viruses no RNA stage;Caudovirales;Siphoviridae;unclassified;unknown	Bacteria;Firmicutes;Bacilli;Lactobacillales;Streptococcaceae;Streptococcus	Streptococcus agalactiae GB00888	prophage	linear	Cluster_20
Bacilli_gi_452730668	hallmark;refseq	18;16;;2	Viruses;dsDNA viruses no RNA stage;Caudovirales;Siphoviridae;unknown;unknown	Bacteria;Firmicutes;Bacilli;Lactobacillales;Streptococcaceae;Streptococcus	Streptococcus agalactiae GB00899	extrachromosomal	linear	Cluster_361
Bacilli_gi_452730788	refseq	32;19;1;12	Viruses;dsDNA viruses no RNA stage;Caudovirales;Siphoviridae;unknown;unknown	Bacteria;Firmicutes;Bacilli;Lactobacillales;Streptococcaceae;Streptococcus	Streptococcus agalactiae GB00899	extrachromosomal	linear	Cluster_62
Bacilli_gi_452730885	hallmark;refseq	46;21;13;12	Viruses;dsDNA viruses no RNA stage;Caudovirales;Siphoviridae;unclassified;unknown	Bacteria;Firmicutes;Bacilli;Lactobacillales;Streptococcaceae;Streptococcus	Streptococcus agalactiae GB00901	extrachromosomal	linear	Cluster_20
Bacilli_gi_452730900-130866-165765	hallmark;refseq	56;37;2;17	Viruses;dsDNA viruses no RNA stage;Caudovirales;Siphoviridae;unknown;unknown	Bacteria;Firmicutes;Bacilli;Lactobacillales;Streptococcaceae;Streptococcus	Streptococcus agalactiae GB00901	prophage	linear	Cluster_65
Bacilli_gi_452730938-8365-49750	hallmark;refseq	44;21;10;13	Viruses;dsDNA viruses no RNA stage;Caudovirales;Siphoviridae;unclassified;unknown	Bacteria;Firmicutes;Bacilli;Lactobacillales;Streptococcaceae;Streptococcus	Streptococcus agalactiae GB00904	prophage	linear	Cluster_20
Bacilli_gi_452730940	hallmark;refseq	36;30;3;3	Viruses;dsDNA viruses no RNA stage;Caudovirales;Siphoviridae;unclassified;unknown	Bacteria;Firmicutes;Bacilli;Lactobacillales;Streptococcaceae;Streptococcus	Streptococcus agalactiae GB00904	extrachromosomal	linear	Cluster_68
Bacilli_gi_452730991-98558-142890	hallmark;refseq;vdb	73;46;7;20	Viruses;dsDNA viruses no RNA stage;Caudovirales;Siphoviridae;unclassified;unknown	Bacteria;Firmicutes;Bacilli;Lactobacillales;Streptococcaceae;Streptococcus	Streptococcus agalactiae GB00911	prophage	linear	Cluster_65
Bacilli_gi_452731028-6901-45440	hallmark;refseq	67;47;3;17	Viruses;dsDNA viruses no RNA stage;Caudovirales;Siphoviridae;C2likevirus;unknown	Bacteria;Firmicutes;Bacilli;Lactobacillales;Streptococcaceae;Streptococcus	Streptococcus agalactiae GB00922	prophage	linear	Cluster_65
Bacilli_gi_452731079-1616-43001	hallmark;refseq	43;21;9;13	Viruses;dsDNA viruses no RNA stage;Caudovirales;Siphoviridae;unknown;unknown	Bacteria;Firmicutes;Bacilli;Lactobacillales;Streptococcaceae;Streptococcus	Streptococcus agalactiae GB00923	prophage	linear	Cluster_20
Bacilli_gi_452731093-8707-49882	hallmark;refseq	42;21;9;12	Viruses;dsDNA viruses no RNA stage;Caudovirales;Siphoviridae;unclassified;unknown	Bacteria;Firmicutes;Bacilli;Lactobacillales;Streptococcaceae;Streptococcus	Streptococcus agalactiae GB00924	prophage	linear	Cluster_20
Bacilli_gi_452731147-3529-44914	hallmark;refseq	43;21;9;13	Viruses;dsDNA viruses no RNA stage;Caudovirales;Siphoviridae;unknown;unknown	Bacteria;Firmicutes;Bacilli;Lactobacillales;Streptococcaceae;Streptococcus	Streptococcus agalactiae GB00929	prophage	linear	Cluster_20
Bacilli_gi_452731199-133480-177733	hallmark;refseq;vdb	73;45;8;20	Viruses;dsDNA viruses no RNA stage;Caudovirales;Siphoviridae;unclassified;unknown	Bacteria;Firmicutes;Bacilli;Lactobacillales;Streptococcaceae;Streptococcus	Streptococcus agalactiae GB00933	prophage	linear	Cluster_65
Bacilli_gi_452731391-8546-40774	hallmark;refseq	47;33;6;8	Viruses;dsDNA viruses no RNA stage;Caudovirales;Siphoviridae;unknown;unknown	Bacteria;Firmicutes;Bacilli;Lactobacillales;Streptococcaceae;Streptococcus	Streptococcus agalactiae GB00947	prophage	linear	Cluster_30
Bacilli_gi_452731493	hallmark;refseq	48;21;13;14	Viruses;dsDNA viruses no RNA stage;Caudovirales;Siphoviridae;unclassified;unknown	Bacteria;Firmicutes;Bacilli;Lactobacillales;Streptococcaceae;Streptococcus	Streptococcus agalactiae GB00955	extrachromosomal	linear	Cluster_20
Bacilli_gi_452731701	hallmark;refseq	21;12;5;4	Viruses;dsDNA viruses no RNA stage;Caudovirales;Siphoviridae;unclassified;unknown	Bacteria;Firmicutes;Bacilli;Lactobacillales;Streptococcaceae;Streptococcus	Streptococcus agalactiae GB00959	extrachromosomal	linear	Cluster_20
Bacilli_gi_452731784-6162-46651	hallmark;refseq;vdb	69;44;7;18	Viruses;dsDNA viruses no RNA stage;Caudovirales;Siphoviridae;C2likevirus;unknown	Bacteria;Firmicutes;Bacilli;Lactobacillales;Streptococcaceae;Streptococcus	Streptococcus agalactiae GB00975	prophage	linear	Cluster_62
Bacilli_gi_452731872-3816-44971	hallmark;refseq	43;21;9;13	Viruses;dsDNA viruses no RNA stage;Caudovirales;Siphoviridae;unknown;unknown	Bacteria;Firmicutes;Bacilli;Lactobacillales;Streptococcaceae;Streptococcus	Streptococcus agalactiae GB00984	prophage	linear	Cluster_20
Bacilli_gi_452731877-0-45193	hallmark;refseq	72;46;6;20	Viruses;dsDNA viruses no RNA stage;Caudovirales;Siphoviridae;unclassified;unknown	Bacteria;Firmicutes;Bacilli;Lactobacillales;Streptococcaceae;Streptococcus	Streptococcus agalactiae GB00984	prophage	linear	Cluster_65
Bacilli_gi_452741601	hallmark;refseq	21;21;;	Viruses;dsDNA viruses no RNA stage;Caudovirales;Siphoviridae;unknown;unknown	Bacteria;Firmicutes;Bacilli;Bacillales;Staphylococcaceae;Staphylococcus	Staphylococcus aureus 16K	extrachromosomal	linear	Cluster_40
Bacilli_gi_452741739	refseq	53;39;12;2	Viruses;dsDNA viruses no RNA stage;Caudovirales;Siphoviridae;unknown;unknown	Bacteria;Firmicutes;Bacilli;Bacillales;Staphylococcaceae;Staphylococcus	Staphylococcus aureus PM1	extrachromosomal	linear	Cluster_254
Bacilli_gi_452741743-79-29606	hallmark;refseq	44;44;;	Viruses;dsDNA viruses no RNA stage;Caudovirales;Siphoviridae;unknown;unknown	Bacteria;Firmicutes;Bacilli;Bacillales;Staphylococcaceae;Staphylococcus	Staphylococcus aureus PM1	prophage	linear	Cluster_40
Bacilli_gi_452741813-125310-169923	hallmark;refseq	62;59;2;1	Viruses;dsDNA viruses no RNA stage;Caudovirales;Siphoviridae;unclassified;unknown	Bacteria;Firmicutes;Bacilli;Bacillales;Staphylococcaceae;Staphylococcus	Staphylococcus aureus NN54	prophage	linear	Cluster_6
Bacilli_gi_452741934	hallmark;refseq	58;43;5;10	Viruses;dsDNA viruses no RNA stage;Caudovirales;Siphoviridae;unclassified;unknown	Bacteria;Firmicutes;Bacilli;Lactobacillales;Streptococcaceae;Streptococcus	Streptococcus pneumoniae SPN7465	extrachromosomal	linear	Cluster_31
Bacilli_gi_452741973-1632797-1666339	hallmark;refseq;vdb	49;39;1;9	Viruses;dsDNA viruses no RNA stage;Caudovirales;Siphoviridae;unclassified;unknown	Bacteria;Firmicutes;Bacilli;Lactobacillales;Streptococcaceae;Streptococcus	Streptococcus pneumoniae SPN021198	prophage	linear	Cluster_31
Bacilli_gi_452741991	hallmark;refseq	50;44;2;4	Viruses;dsDNA viruses no RNA stage;Caudovirales;Siphoviridae;unclassified;unknown	Bacteria;Firmicutes;Bacilli;Lactobacillales;Streptococcaceae;Streptococcus	Streptococcus pneumoniae SPN072838	extrachromosomal	linear	Cluster_31
Bacilli_gi_458798330-349456-403365	hallmark;refseq;vdb	88;37;6;45	Viruses;dsDNA viruses no RNA stage;Caudovirales;Myoviridae;T4likevirus;unknown	Bacteria;Firmicutes;Bacilli;Bacillales;Bacillaceae;Bacillus	Bacillus sonorensis L12	prophage	linear	Cluster_407
Bacilli_gi_459284225-1720262-1756205	hallmark;refseq	60;41;2;17	Viruses;dsDNA viruses no RNA stage;Caudovirales;Siphoviridae;unknown;unknown	Bacteria;Firmicutes;Bacilli;Lactobacillales;Streptococcaceae;Lactococcus	Lactococcus lactis subsp. lactis IO-1	prophage	linear	Cluster_195
Bacilli_gi_459788634-14632-35431	hallmark;refseq	32;23;2;7	Viruses;dsDNA viruses no RNA stage;Caudovirales;Siphoviridae;Phic3unalikevirus;unknown	Bacteria;Firmicutes;Bacilli;Bacillales;Listeriaceae;Listeria	Listeria fleischmannii LU2006-1	prophage	linear	Cluster_32
Bacilli_gi_459789085	hallmark;refseq	30;14;4;12	Viruses;dsDNA viruses no RNA stage;Caudovirales;Siphoviridae;unclassified;unknown	Bacteria;Firmicutes;Bacilli;Bacillales;Listeriaceae;Listeria	Listeria fleischmannii LU2006-1	extrachromosomal	linear	Cluster_6
Bacilli_gi_459790340-432953-471546	hallmark;refseq	56;40;1;15	Viruses;dsDNA viruses no RNA stage;Caudovirales;Siphoviridae;unknown;unknown	Bacteria;Firmicutes;Bacilli;Lactobacillales;Streptococcaceae;Streptococcus	Streptococcus parauberis KRS-02083	prophage	linear	Cluster_32
Bacilli_gi_459819101-64627-104037	hallmark;refseq	61;44;1;16	Viruses;dsDNA viruses no RNA stage;Caudovirales;Siphoviridae;unclassified;unknown	Bacteria;Firmicutes;Bacilli;Lactobacillales;Streptococcaceae;Streptococcus	Streptococcus tigurinus AZ_3a	prophage	linear	Cluster_31
Bacilli_gi_470922499	hallmark;refseq	64;28;8;28	Viruses;dsDNA viruses no RNA stage;Caudovirales;Siphoviridae;Lambdalikevirus;unknown	Bacteria;Firmicutes;Bacilli;Bacillales;Bacillaceae;Bacillus	Bacillus stratosphericus LAMA 585	extrachromosomal	linear	Cluster_49
Bacilli_gi_47092373-35639-76172	hallmark;refseq	69;49;11;9	Viruses;dsDNA viruses no RNA stage;Caudovirales;Siphoviridae;unknown;unknown	Bacteria;Firmicutes;Bacilli;Bacillales;Listeriaceae;Listeria	Listeria monocytogenes serotype 4b str. H7858	prophage	linear	Cluster_94
Bacilli_gi_470935649	hallmark;refseq	21;10;4;7	Viruses;dsDNA viruses no RNA stage;Caudovirales;Siphoviridae;Lambdalikevirus;unknown	Bacteria;Firmicutes;Bacilli;Lactobacillales;Lactobacillaceae;Lactobacillus	Lactobacillus plantarum UCMA 3037	extrachromosomal	linear	Cluster_138
Bacilli_gi_470952890	hallmark;refseq	39;18;9;12	Viruses;dsDNA viruses no RNA stage;Caudovirales;Siphoviridae;unclassified;unknown	Bacteria;Firmicutes;Bacilli;Lactobacillales;Streptococcaceae;Streptococcus	Streptococcus agalactiae CF01173	extrachromosomal	linear	Cluster_20
Bacilli_gi_470957326-10686-89923	hallmark;refseq	89;21;27;41	Viruses;dsDNA viruses no RNA stage;Caudovirales;Siphoviridae;unclassified;unknown	Bacteria;Firmicutes;Bacilli;Lactobacillales;Streptococcaceae;Streptococcus	Streptococcus agalactiae SS1014	prophage	linear	Cluster_220
Bacilli_gi_47095974-43-40624	hallmark;refseq	62;46;9;7	Viruses;dsDNA viruses no RNA stage;Caudovirales;Siphoviridae;Lambdalikevirus;unknown	Bacteria;Firmicutes;Bacilli;Bacillales;Listeriaceae;Listeria	Listeria monocytogenes serotype 1/2a str. F6854	prophage	linear	Cluster_185
Bacilli_gi_47569625	refseq	44;25;7;12	Viruses;dsDNA viruses no RNA stage;Caudovirales;Siphoviridae;unknown;unknown	Bacteria;Firmicutes;Bacilli;Bacillales;Bacillaceae;Bacillus	Bacillus cereus G9241	extrachromosomal	linear	Cluster_116
Bacilli_gi_476525634-6267-41028	hallmark;refseq;vdb	55;33;5;17	Viruses;dsDNA viruses no RNA stage;Caudovirales;Siphoviridae;unknown;unknown	Bacteria;Firmicutes;Bacilli;Lactobacillales;Enterococcaceae;Enterococcus	Enterococcus durans IPLA 655	prophage	linear	Cluster_119
Bacilli_gi_479328021-1541325-1589007	hallmark;refseq	71;65;5;1	Viruses;dsDNA viruses no RNA stage;Caudovirales;Siphoviridae;unclassified;unknown	Bacteria;Firmicutes;Bacilli;Bacillales;Staphylococcaceae;Staphylococcus	Staphylococcus aureus M1	prophage	linear	Cluster_6
Bacilli_gi_480445016-1058696-1104024	hallmark;refseq	54;49;3;2	Viruses;dsDNA viruses no RNA stage;Caudovirales;Siphoviridae;unclassified;unknown	Bacteria;Firmicutes;Bacilli;Bacillales;Staphylococcaceae;Staphylococcus	Staphylococcus aureus M0719	prophage	linear	Cluster_6
Bacilli_gi_480445016-710443-754751	hallmark;refseq	58;56;2;	Viruses;dsDNA viruses no RNA stage;Caudovirales;Siphoviridae;unclassified;unknown	Bacteria;Firmicutes;Bacilli;Bacillales;Staphylococcaceae;Staphylococcus	Staphylococcus aureus M0719	prophage	linear	Cluster_8
Bacilli_gi_480447120-324466-342964	hallmark;refseq	42;41;1;	Viruses;dsDNA viruses no RNA stage;Caudovirales;Siphoviridae;unknown;unknown	Bacteria;Firmicutes;Bacilli;Bacillales;Staphylococcaceae;Staphylococcus	Staphylococcus aureus M0769	prophage	linear	Cluster_8
Bacilli_gi_480454219-425923-470373	hallmark;refseq	55;52;3;	Viruses;dsDNA viruses no RNA stage;Caudovirales;Siphoviridae;unclassified;unknown	Bacteria;Firmicutes;Bacilli;Bacillales;Staphylococcaceae;Staphylococcus	Staphylococcus aureus M0770	prophage	linear	Cluster_6
Bacilli_gi_480530348-23745-57287	hallmark;refseq;vdb	49;39;1;9	Viruses;dsDNA viruses no RNA stage;Caudovirales;Siphoviridae;unclassified;unknown	Bacteria;Firmicutes;Bacilli;Lactobacillales;Streptococcaceae;Streptococcus	Streptococcus pneumoniae SPN994039	prophage	linear	Cluster_31
Bacilli_gi_480533968-23745-57287	hallmark;refseq;vdb	49;39;1;9	Viruses;dsDNA viruses no RNA stage;Caudovirales;Siphoviridae;unclassified;unknown	Bacteria;Firmicutes;Bacilli;Lactobacillales;Streptococcaceae;Streptococcus	Streptococcus pneumoniae SPN994038	prophage	linear	Cluster_31
Bacilli_gi_480535788-23745-57287	hallmark;refseq;vdb	49;39;1;9	Viruses;dsDNA viruses no RNA stage;Caudovirales;Siphoviridae;unclassified;unknown	Bacteria;Firmicutes;Bacilli;Lactobacillales;Streptococcaceae;Streptococcus	Streptococcus pneumoniae SPN034183	prophage	linear	Cluster_31
Bacilli_gi_480994456-0-25579	hallmark;refseq	29;18;3;8	Viruses;dsDNA viruses no RNA stage;Caudovirales;Siphoviridae;unknown;unknown	Bacteria;Firmicutes;Bacilli;Lactobacillales;Streptococcaceae;Streptococcus	Streptococcus sp. GMD5S	prophage	linear	Cluster_20
Bacilli_gi_481024207	refseq	11;6;5;	Viruses;dsDNA viruses no RNA stage;Caudovirales;Myoviridae;T4likevirus;unknown	Bacteria;Firmicutes;Bacilli;Bacillales;Staphylococcaceae;Staphylococcus	Staphylococcus aureus PPUKM-261-2009	extrachromosomal	linear	Cluster_541
Bacilli_gi_481024309	refseq	48;16;2;30	Viruses;dsDNA viruses no RNA stage;Caudovirales;unclassified;unclassified;unknown	Bacteria;Firmicutes;Bacilli;Bacillales;Staphylococcaceae;Staphylococcus	Staphylococcus aureus PPUKM-261-2009	extrachromosomal	linear	Cluster_194
Bacilli_gi_481024485-52394-82914	hallmark;refseq	38;37;1;	Viruses;dsDNA viruses no RNA stage;Caudovirales;Siphoviridae;unclassified;unknown	Bacteria;Firmicutes;Bacilli;Bacillales;Staphylococcaceae;Staphylococcus	Staphylococcus aureus PPUKM-332-2009	prophage	linear	Cluster_6
Bacilli_gi_481024565	refseq	38;15;2;21	Viruses;dsDNA viruses no RNA stage;Caudovirales;Siphoviridae;Spbetalikevirus;unknown	Bacteria;Firmicutes;Bacilli;Bacillales;Staphylococcaceae;Staphylococcus	Staphylococcus aureus PPUKM-332-2009	extrachromosomal	linear	Cluster_194
Bacilli_gi_481024571	refseq	44;24;5;15	Viruses;dsDNA viruses no RNA stage;Caudovirales;Siphoviridae;unclassified;unknown	Bacteria;Firmicutes;Bacilli;Bacillales;Staphylococcaceae;Staphylococcus	Staphylococcus aureus PPUKM-332-2009	extrachromosomal	linear	Cluster_211
Bacilli_gi_481024682	hallmark;refseq	44;36;6;2	Viruses;dsDNA viruses no RNA stage;Caudovirales;Siphoviridae;unclassified;unknown	Bacteria;Firmicutes;Bacilli;Bacillales;Staphylococcaceae;Staphylococcus	Staphylococcus aureus PPUKM-377-2009	extrachromosomal	linear	Cluster_8
Bacilli_gi_481024711	refseq	12;9;2;1	Viruses;dsDNA viruses no RNA stage;Caudovirales;Siphoviridae;unknown;unknown	Bacteria;Firmicutes;Bacilli;Bacillales;Staphylococcaceae;Staphylococcus	Staphylococcus aureus PPUKM-377-2009	extrachromosomal	linear	Cluster_337
Bacilli_gi_481024735	hallmark;refseq	37;36;1;	Viruses;dsDNA viruses no RNA stage;Caudovirales;Siphoviridae;unclassified;unknown	Bacteria;Firmicutes;Bacilli;Bacillales;Staphylococcaceae;Staphylococcus	Staphylococcus aureus PPUKM-377-2009	extrachromosomal	linear	Cluster_6
Bacilli_gi_481024736	hallmark;refseq	31;31;;	Viruses;dsDNA viruses no RNA stage;Caudovirales;Siphoviridae;unknown;unknown	Bacteria;Firmicutes;Bacilli;Bacillales;Staphylococcaceae;Staphylococcus	Staphylococcus aureus PPUKM-377-2009	extrachromosomal	linear	Cluster_40
Bacilli_gi_481024739	refseq	26;15;8;3	Viruses;dsDNA viruses no RNA stage;unclassified;unclassified;unknown;unknown	Bacteria;Firmicutes;Bacilli;Bacillales;Staphylococcaceae;Staphylococcus	Staphylococcus aureus PPUKM-377-2009	extrachromosomal	linear	Cluster_254
Bacilli_gi_481024799-89461-119979	hallmark;refseq	33;32;1;	Viruses;dsDNA viruses no RNA stage;Caudovirales;Siphoviridae;unclassified;unknown	Bacteria;Firmicutes;Bacilli;Bacillales;Staphylococcaceae;Staphylococcus	Staphylococcus aureus PPUKM-775-2009	prophage	linear	Cluster_6
Bacilli_gi_481024830	refseq	48;16;2;30	Viruses;dsDNA viruses no RNA stage;Caudovirales;unclassified;unclassified;unknown	Bacteria;Firmicutes;Bacilli;Bacillales;Staphylococcaceae;Staphylococcus	Staphylococcus aureus PPUKM-775-2009	extrachromosomal	linear	Cluster_194
Bacilli_gi_481024984-12820-57152	hallmark;refseq	65;58;5;2	Viruses;dsDNA viruses no RNA stage;Caudovirales;Siphoviridae;unknown;unknown	Bacteria;Firmicutes;Bacilli;Bacillales;Staphylococcaceae;Staphylococcus	Staphylococcus aureus M2	prophage	linear	Cluster_40
Bacilli_gi_481025031-17-32408	hallmark;refseq	47;45;1;1	Viruses;dsDNA viruses no RNA stage;Caudovirales;Siphoviridae;unclassified;unknown	Bacteria;Firmicutes;Bacilli;Bacillales;Staphylococcaceae;Staphylococcus	Staphylococcus aureus 3957	prophage	linear	Cluster_8
Bacilli_gi_481025031-337641-367855	hallmark;refseq	43;43;;	Viruses;dsDNA viruses no RNA stage;Caudovirales;Siphoviridae;unknown;unknown	Bacteria;Firmicutes;Bacilli;Bacillales;Staphylococcaceae;Staphylococcus	Staphylococcus aureus 3957	prophage	linear	Cluster_40
Bacilli_gi_481025061-0-33480	hallmark;refseq	51;51;;	Viruses;dsDNA viruses no RNA stage;Caudovirales;Siphoviridae;unknown;unknown	Bacteria;Firmicutes;Bacilli;Bacillales;Staphylococcaceae;Staphylococcus	Staphylococcus aureus LVP2	prophage	linear	Cluster_8
Bacilli_gi_481025070	hallmark;refseq	22;21;1;	Viruses;dsDNA viruses no RNA stage;Caudovirales;Siphoviridae;Lambdalikevirus;unknown	Bacteria;Firmicutes;Bacilli;Bacillales;Staphylococcaceae;Staphylococcus	Staphylococcus aureus LVP2	extrachromosomal	linear	Cluster_35
Bacilli_gi_481025098	hallmark;refseq	21;21;;	Viruses;dsDNA viruses no RNA stage;Caudovirales;Siphoviridae;Lambdalikevirus;unknown	Bacteria;Firmicutes;Bacilli;Bacillales;Staphylococcaceae;Staphylococcus	Staphylococcus aureus LVP2	extrachromosomal	linear	Cluster_49
Bacilli_gi_481025125	refseq	18;10;3;5	Viruses;dsDNA viruses no RNA stage;Caudovirales;Siphoviridae;unknown;unknown	Bacteria;Firmicutes;Bacilli;Bacillales;Staphylococcaceae;Staphylococcus	Staphylococcus aureus LVP5	extrachromosomal	linear	Cluster_337
Bacilli_gi_481025128-557106-586729	hallmark;refseq	38;37;;1	Viruses;dsDNA viruses no RNA stage;Caudovirales;Siphoviridae;unclassified;unknown	Bacteria;Firmicutes;Bacilli;Bacillales;Staphylococcaceae;Staphylococcus	Staphylococcus aureus LVP5	prophage	linear	Cluster_49
Bacilli_gi_481025157-2928-28997	hallmark;refseq	35;35;;	Viruses;dsDNA viruses no RNA stage;Caudovirales;Siphoviridae;unknown;unknown	Bacteria;Firmicutes;Bacilli;Bacillales;Staphylococcaceae;Staphylococcus	Staphylococcus aureus VH221	prophage	linear	Cluster_40
Bacilli_gi_481025179	hallmark;refseq	40;38;1;1	Viruses;dsDNA viruses no RNA stage;Caudovirales;Siphoviridae;unclassified;unknown	Bacteria;Firmicutes;Bacilli;Bacillales;Staphylococcaceae;Staphylococcus	Staphylococcus aureus VH221	extrachromosomal	linear	Cluster_49
Bacilli_gi_481025197	refseq	25;24;1;	Viruses;dsDNA viruses no RNA stage;Caudovirales;Siphoviridae;unknown;unknown	Bacteria;Firmicutes;Bacilli;Bacillales;Staphylococcaceae;Staphylococcus	Staphylococcus aureus VH221	extrachromosomal	linear	Cluster_8
Bacilli_gi_481025272	hallmark;refseq	35;18;8;9	Viruses;dsDNA viruses no RNA stage;Caudovirales;Siphoviridae;unclassified;unknown	Bacteria;Firmicutes;Bacilli;Lactobacillales;Streptococcaceae;Streptococcus	Streptococcus agalactiae FSL S3-170	extrachromosomal	linear	Cluster_20
Bacilli_gi_481025615	refseq;vdb	10;1;6;3	Viruses;dsDNA viruses no RNA stage;Caudovirales;Siphoviridae;unclassified;unclassified	Bacteria;Firmicutes;Bacilli;Lactobacillales;Streptococcaceae;Streptococcus	Streptococcus agalactiae FSL C1-487	extrachromosomal	linear	Cluster_220
Bacilli_gi_481025641	hallmark;refseq	54;22;14;18	Viruses;dsDNA viruses no RNA stage;Caudovirales;Siphoviridae;unknown;unknown	Bacteria;Firmicutes;Bacilli;Lactobacillales;Streptococcaceae;Streptococcus	Streptococcus agalactiae FSL C1-487	extrachromosomal	linear	Cluster_20
Bacilli_gi_481025764	refseq;vdb	20;8;6;6	Viruses;dsDNA viruses no RNA stage;Caudovirales;Siphoviridae;unknown;unknown	Bacteria;Firmicutes;Bacilli;Lactobacillales;Streptococcaceae;Streptococcus	Streptococcus agalactiae FSL S3-026	extrachromosomal	linear	Cluster_20
Bacilli_gi_481025765	hallmark	19;10;4;5	Viruses;dsDNA viruses no RNA stage;Caudovirales;Siphoviridae;Lambdalikevirus;unknown	Bacteria;Firmicutes;Bacilli;Lactobacillales;Streptococcaceae;Streptococcus	Streptococcus agalactiae FSL S3-026	extrachromosomal	linear	Cluster_20
Bacilli_gi_481025831	hallmark	31;12;9;10	Viruses;dsDNA viruses no RNA stage;Caudovirales;Siphoviridae;unclassified;unknown	Bacteria;Firmicutes;Bacilli;Lactobacillales;Streptococcaceae;Streptococcus	Streptococcus agalactiae FSL S3-586	extrachromosomal	linear	Cluster_20
Bacilli_gi_481025847	hallmark	37;12;9;16	Viruses;dsDNA viruses no RNA stage;Caudovirales;Siphoviridae;unknown;unknown	Bacteria;Firmicutes;Bacilli;Lactobacillales;Streptococcaceae;Streptococcus	Streptococcus agalactiae FSL S3-586	extrachromosomal	linear	Cluster_20
Bacilli_gi_481025939-2369-38046	hallmark;refseq	52;32;6;14	Viruses;unclassified;unclassified;unclassified;unknown;unknown	Bacteria;Firmicutes;Bacilli;Lactobacillales;Streptococcaceae;Streptococcus	Streptococcus agalactiae FSL S3-105	prophage	linear	Cluster_166
Bacilli_gi_481025944-6175-29564	hallmark;refseq	49;27;1;21	Viruses;dsDNA viruses no RNA stage;Caudovirales;Siphoviridae;unknown;unknown	Bacteria;Firmicutes;Bacilli;Lactobacillales;Streptococcaceae;Streptococcus	Streptococcus agalactiae FSL S3-105	prophage	linear	Cluster_62
Bacilli_gi_481025945	hallmark;refseq;vdb	36;20;11;5	Viruses;dsDNA viruses no RNA stage;Caudovirales;Siphoviridae;unclassified;unknown	Bacteria;Firmicutes;Bacilli;Lactobacillales;Streptococcaceae;Streptococcus	Streptococcus agalactiae FSL S3-105	extrachromosomal	linear	Cluster_62
Bacilli_gi_481025968-0-40916	hallmark;refseq	49;24;11;14	Viruses;dsDNA viruses no RNA stage;Caudovirales;Siphoviridae;unclassified;unknown	Bacteria;Firmicutes;Bacilli;Lactobacillales;Streptococcaceae;Streptococcus	Streptococcus agalactiae FSL S3-105	prophage	linear	Cluster_20
Bacilli_gi_481026096	hallmark;refseq	36;19;8;9	Viruses;dsDNA viruses no RNA stage;Caudovirales;Siphoviridae;unclassified;unknown	Bacteria;Firmicutes;Bacilli;Lactobacillales;Streptococcaceae;Streptococcus	Streptococcus agalactiae FSL S3-251	extrachromosomal	linear	Cluster_20
Bacilli_gi_481026110	hallmark;refseq	27;21;1;5	Viruses;dsDNA viruses no RNA stage;Caudovirales;Siphoviridae;unknown;unknown	Bacteria;Firmicutes;Bacilli;Lactobacillales;Streptococcaceae;Streptococcus	Streptococcus agalactiae FSL S3-251	extrachromosomal	linear	Cluster_62
Bacilli_gi_481026132	hallmark;refseq	52;22;14;16	Viruses;dsDNA viruses no RNA stage;Caudovirales;Siphoviridae;unclassified;unknown	Bacteria;Firmicutes;Bacilli;Lactobacillales;Streptococcaceae;Streptococcus	Streptococcus agalactiae FSL S3-023	extrachromosomal	linear	Cluster_20
Bacilli_gi_481026145-19322-50783	hallmark;refseq	45;32;3;10	Viruses;dsDNA viruses no RNA stage;Caudovirales;Siphoviridae;unknown;unknown	Bacteria;Firmicutes;Bacilli;Lactobacillales;Streptococcaceae;Streptococcus	Streptococcus agalactiae FSL S3-090	prophage	linear	Cluster_166
Bacilli_gi_481026161-1592-40517	hallmark;refseq;vdb	67;41;4;22	Viruses;dsDNA viruses no RNA stage;Caudovirales;Siphoviridae;unclassified;unknown	Bacteria;Firmicutes;Bacilli;Lactobacillales;Streptococcaceae;Streptococcus	Streptococcus agalactiae FSL S3-090	prophage	linear	Cluster_65
Bacilli_gi_481026446-11850-50978	hallmark;refseq;vdb	67;41;7;19	Viruses;dsDNA viruses no RNA stage;Caudovirales;Siphoviridae;C2likevirus;unknown	Bacteria;Firmicutes;Bacilli;Lactobacillales;Streptococcaceae;Streptococcus	Streptococcus agalactiae FSL S3-268	prophage	linear	Cluster_62
Bacilli_gi_481026520-9454-50787	hallmark;refseq;vdb	72;44;7;21	Viruses;dsDNA viruses no RNA stage;Caudovirales;Siphoviridae;C2likevirus;unknown	Bacteria;Firmicutes;Bacilli;Lactobacillales;Streptococcaceae;Streptococcus	Streptococcus agalactiae FSL S3-005	prophage	linear	Cluster_62
Bacilli_gi_481026543-1504-45392	hallmark;refseq	44;21;9;14	Viruses;dsDNA viruses no RNA stage;Caudovirales;Siphoviridae;unclassified;unknown	Bacteria;Firmicutes;Bacilli;Lactobacillales;Streptococcaceae;Streptococcus	Streptococcus agalactiae FSL S3-001	prophage	linear	Cluster_20
Bacilli_gi_481026558	hallmark;refseq	31;18;;13	Viruses;dsDNA viruses no RNA stage;Caudovirales;Siphoviridae;unknown;unknown	Bacteria;Firmicutes;Bacilli;Lactobacillales;Streptococcaceae;Streptococcus	Streptococcus agalactiae CCUG 91	extrachromosomal	linear	Cluster_65
Bacilli_gi_481026569	hallmark;refseq	35;25;1;9	Viruses;dsDNA viruses no RNA stage;Caudovirales;Siphoviridae;unclassified;unknown	Bacteria;Firmicutes;Bacilli;Lactobacillales;Streptococcaceae;Streptococcus	Streptococcus agalactiae CCUG 91	extrachromosomal	linear	Cluster_65
Bacilli_gi_481026583-9009-31886	hallmark;refseq	45;26;2;17	Viruses;dsDNA viruses no RNA stage;Caudovirales;Siphoviridae;unknown;unknown	Bacteria;Firmicutes;Bacilli;Lactobacillales;Streptococcaceae;Streptococcus	Streptococcus agalactiae CCUG 91	prophage	linear	Cluster_65
Bacilli_gi_481026597-47782-79843	hallmark;refseq	47;33;5;9	Viruses;dsDNA viruses no RNA stage;Caudovirales;Siphoviridae;unknown;unknown	Bacteria;Firmicutes;Bacilli;Lactobacillales;Streptococcaceae;Streptococcus	Streptococcus agalactiae CCUG 17336	prophage	linear	Cluster_30
Bacilli_gi_481026629-68607-104716	hallmark;refseq	49;37;2;10	Viruses;dsDNA viruses no RNA stage;Caudovirales;Siphoviridae;unknown;unknown	Bacteria;Firmicutes;Bacilli;Lactobacillales;Streptococcaceae;Streptococcus	Streptococcus agalactiae CCUG 17336	prophage	linear	Cluster_88
Bacilli_gi_481026738-17833-52408	hallmark;refseq	66;43;4;19	Viruses;dsDNA viruses no RNA stage;Caudovirales;Siphoviridae;unclassified;unknown	Bacteria;Firmicutes;Bacilli;Lactobacillales;Streptococcaceae;Streptococcus	Streptococcus agalactiae CCUG 28551	prophage	linear	Cluster_65
Bacilli_gi_481026809-262624-294415	hallmark;refseq	47;33;5;9	Viruses;dsDNA viruses no RNA stage;Caudovirales;Siphoviridae;unknown;unknown	Bacteria;Firmicutes;Bacilli;Lactobacillales;Streptococcaceae;Streptococcus	Streptococcus agalactiae CCUG 29376	prophage	linear	Cluster_30
Bacilli_gi_481026857	hallmark;refseq	52;22;14;16	Viruses;dsDNA viruses no RNA stage;Caudovirales;Siphoviridae;unclassified;unknown	Bacteria;Firmicutes;Bacilli;Lactobacillales;Streptococcaceae;Streptococcus	Streptococcus agalactiae CCUG 30636	extrachromosomal	linear	Cluster_20
Bacilli_gi_481026890	hallmark;refseq	52;33;7;12	Viruses;dsDNA viruses no RNA stage;Caudovirales;Siphoviridae;unknown;unknown	Bacteria;Firmicutes;Bacilli;Lactobacillales;Streptococcaceae;Streptococcus	Streptococcus agalactiae CCUG 37736	extrachromosomal	linear	Cluster_166
Bacilli_gi_481026947	refseq	16;7;5;4	Viruses;dsDNA viruses no RNA stage;Caudovirales;Siphoviridae;unknown;unknown	Bacteria;Firmicutes;Bacilli;Lactobacillales;Streptococcaceae;Streptococcus	Streptococcus agalactiae CCUG 37740	extrachromosomal	linear	Cluster_20
Bacilli_gi_481026958	hallmark	29;11;7;11	Viruses;dsDNA viruses no RNA stage;Caudovirales;Siphoviridae;unclassified;unknown	Bacteria;Firmicutes;Bacilli;Lactobacillales;Streptococcaceae;Streptococcus	Streptococcus agalactiae CCUG 37740	extrachromosomal	linear	Cluster_20
Bacilli_gi_481027039	hallmark;refseq	37;17;9;11	Viruses;dsDNA viruses no RNA stage;Caudovirales;Siphoviridae;unclassified;unknown	Bacteria;Firmicutes;Bacilli;Lactobacillales;Streptococcaceae;Streptococcus	Streptococcus agalactiae CCUG 44050	extrachromosomal	linear	Cluster_20
Bacilli_gi_481027065-15463-54257	hallmark;refseq	62;39;;23	Viruses;dsDNA viruses no RNA stage;Caudovirales;Siphoviridae;unknown;unknown	Bacteria;Firmicutes;Bacilli;Lactobacillales;Streptococcaceae;Streptococcus	Streptococcus agalactiae CCUG 44074	prophage	linear	Cluster_65
Bacilli_gi_481027265-10173-63118	hallmark;refseq;vdb	80;40;23;17	Viruses;dsDNA viruses no RNA stage;Caudovirales;Siphoviridae;unclassified;unknown	Bacteria;Firmicutes;Bacilli;Lactobacillales;Streptococcaceae;Streptococcus	Streptococcus agalactiae CCUG 44110	prophage	linear	Cluster_62
Bacilli_gi_481027308	hallmark;refseq	51;21;13;17	Viruses;dsDNA viruses no RNA stage;Caudovirales;Siphoviridae;unclassified;unknown	Bacteria;Firmicutes;Bacilli;Lactobacillales;Streptococcaceae;Streptococcus	Streptococcus agalactiae CCUG 44140	extrachromosomal	linear	Cluster_20
Bacilli_gi_481027343-68798-104907	hallmark;refseq	49;37;2;10	Viruses;dsDNA viruses no RNA stage;Caudovirales;Siphoviridae;unknown;unknown	Bacteria;Firmicutes;Bacilli;Lactobacillales;Streptococcaceae;Streptococcus	Streptococcus agalactiae CCUG 44186	prophage	linear	Cluster_88
Bacilli_gi_481027426	hallmark;refseq	43;20;11;12	Viruses;dsDNA viruses no RNA stage;Caudovirales;Siphoviridae;unclassified;unknown	Bacteria;Firmicutes;Bacilli;Lactobacillales;Streptococcaceae;Streptococcus	Streptococcus agalactiae CCUG 49072	extrachromosomal	linear	Cluster_20
Bacilli_gi_481027460-100277-132558	hallmark;refseq	46;33;3;10	Viruses;dsDNA viruses no RNA stage;Caudovirales;Siphoviridae;unknown;unknown	Bacteria;Firmicutes;Bacilli;Lactobacillales;Streptococcaceae;Streptococcus	Streptococcus agalactiae CCUG 49086	prophage	linear	Cluster_166
Bacilli_gi_481027468-44864-77281	hallmark;refseq	47;32;6;9	Viruses;dsDNA viruses no RNA stage;Caudovirales;Siphoviridae;unknown;unknown	Bacteria;Firmicutes;Bacilli;Lactobacillales;Streptococcaceae;Streptococcus	Streptococcus agalactiae CCUG 49086	prophage	linear	Cluster_30
Bacilli_gi_481027489-19253-50685	hallmark;refseq	45;32;3;10	Viruses;dsDNA viruses no RNA stage;Caudovirales;Siphoviridae;unknown;unknown	Bacteria;Firmicutes;Bacilli;Lactobacillales;Streptococcaceae;Streptococcus	Streptococcus agalactiae CCUG 49100	prophage	linear	Cluster_166
Bacilli_gi_481027494	hallmark;refseq	50;21;13;16	Viruses;dsDNA viruses no RNA stage;Caudovirales;Siphoviridae;unclassified;unknown	Bacteria;Firmicutes;Bacilli;Lactobacillales;Streptococcaceae;Streptococcus	Streptococcus agalactiae CCUG 49100	extrachromosomal	linear	Cluster_20
Bacilli_gi_481027541	hallmark;refseq	47;20;13;14	Viruses;dsDNA viruses no RNA stage;Caudovirales;Siphoviridae;unclassified;unknown	Bacteria;Firmicutes;Bacilli;Lactobacillales;Streptococcaceae;Streptococcus	Streptococcus agalactiae LMG 15083	extrachromosomal	linear	Cluster_20
Bacilli_gi_481027544-39837-76776	hallmark;refseq	56;39;5;12	Viruses;dsDNA viruses no RNA stage;Caudovirales;Siphoviridae;unclassified;unknown	Bacteria;Firmicutes;Bacilli;Lactobacillales;Streptococcaceae;Streptococcus	Streptococcus agalactiae LMG 15083	prophage	linear	Cluster_62
Bacilli_gi_481027600-19323-53212	hallmark;refseq	53;38;2;13	Viruses;dsDNA viruses no RNA stage;Caudovirales;Siphoviridae;unknown;unknown	Bacteria;Firmicutes;Bacilli;Lactobacillales;Streptococcaceae;Streptococcus	Streptococcus agalactiae LMG 15089	prophage	linear	Cluster_52
Bacilli_gi_481027614	hallmark;refseq	53;35;7;11	Viruses;dsDNA viruses no RNA stage;Caudovirales;Siphoviridae;unclassified;unknown	Bacteria;Firmicutes;Bacilli;Lactobacillales;Streptococcaceae;Streptococcus	Streptococcus agalactiae LMG 15089	extrachromosomal	linear	Cluster_62
Bacilli_gi_481027706-20664-52426	hallmark;refseq	48;31;3;14	Viruses;dsDNA viruses no RNA stage;Caudovirales;Siphoviridae;unknown;unknown	Bacteria;Firmicutes;Bacilli;Lactobacillales;Streptococcaceae;Streptococcus	Streptococcus agalactiae BSU248	prophage	linear	Cluster_166
Bacilli_gi_481027755-0-45833	hallmark;refseq	46;21;11;14	Viruses;dsDNA viruses no RNA stage;Caudovirales;Siphoviridae;unknown;unknown	Bacteria;Firmicutes;Bacilli;Lactobacillales;Streptococcaceae;Streptococcus	Streptococcus agalactiae BSU447	prophage	linear	Cluster_20
Bacilli_gi_481027788	hallmark;refseq	51;36;3;12	Viruses;dsDNA viruses no RNA stage;Caudovirales;Siphoviridae;unknown;unknown	Bacteria;Firmicutes;Bacilli;Lactobacillales;Streptococcaceae;Streptococcus	Streptococcus agalactiae BSU260	extrachromosomal	linear	Cluster_88
Bacilli_gi_481027800	hallmark;refseq	57;38;6;13	Viruses;dsDNA viruses no RNA stage;Caudovirales;Siphoviridae;unclassified;unknown	Bacteria;Firmicutes;Bacilli;Lactobacillales;Streptococcaceae;Streptococcus	Streptococcus agalactiae BSU260	extrachromosomal	linear	Cluster_62
Bacilli_gi_481027825-215022-255439	hallmark;refseq	64;41;3;20	Viruses;dsDNA viruses no RNA stage;Caudovirales;Siphoviridae;unknown;unknown	Bacteria;Firmicutes;Bacilli;Lactobacillales;Streptococcaceae;Streptococcus	Streptococcus agalactiae BSU451	prophage	linear	Cluster_65
Bacilli_gi_481028027-34357-73011	hallmark;refseq	59;46;3;10	Viruses;dsDNA viruses no RNA stage;Caudovirales;Siphoviridae;C2likevirus;unknown	Bacteria;Firmicutes;Bacilli;Lactobacillales;Streptococcaceae;Streptococcus	Streptococcus agalactiae STIR-CD-14	prophage	linear	Cluster_65
Bacilli_gi_481028052	hallmark;refseq	59;38;7;14	Viruses;dsDNA viruses no RNA stage;Caudovirales;Siphoviridae;C2likevirus;unknown	Bacteria;Firmicutes;Bacilli;Lactobacillales;Streptococcaceae;Streptococcus	Streptococcus agalactiae STIR-CD-25	extrachromosomal	linear	Cluster_62
Bacilli_gi_481028088	hallmark;refseq	35;17;10;8	Viruses;dsDNA viruses no RNA stage;Caudovirales;Siphoviridae;unclassified;unknown	Bacteria;Firmicutes;Bacilli;Lactobacillales;Streptococcaceae;Streptococcus	Streptococcus agalactiae STIR-CD-26	extrachromosomal	linear	Cluster_20
Bacilli_gi_481028166-43292-69307	hallmark;refseq	29;18;4;7	Viruses;dsDNA viruses no RNA stage;Caudovirales;Siphoviridae;unclassified;unknown	Bacteria;Firmicutes;Bacilli;Lactobacillales;Streptococcaceae;Streptococcus	Streptococcus agalactiae MRI Z1-022	prophage	linear	Cluster_20
Bacilli_gi_481028209-32815-50341	hallmark;refseq	41;24;2;15	Viruses;dsDNA viruses no RNA stage;Caudovirales;Siphoviridae;unknown;unknown	Bacteria;Firmicutes;Bacilli;Lactobacillales;Streptococcaceae;Streptococcus	Streptococcus agalactiae MRI Z1-023	prophage	linear	Cluster_65
Bacilli_gi_481028229	hallmark;refseq	51;21;14;16	Viruses;dsDNA viruses no RNA stage;Caudovirales;Siphoviridae;unclassified;unknown	Bacteria;Firmicutes;Bacilli;Lactobacillales;Streptococcaceae;Streptococcus	Streptococcus agalactiae MRI Z1-025	extrachromosomal	linear	Cluster_20
Bacilli_gi_481028273-113676-151001	hallmark;refseq;vdb	64;36;10;18	Viruses;dsDNA viruses no RNA stage;Caudovirales;Siphoviridae;unclassified;unknown	Bacteria;Firmicutes;Bacilli;Lactobacillales;Streptococcaceae;Streptococcus	Streptococcus agalactiae MRI Z1-035	prophage	linear	Cluster_62
Bacilli_gi_481028301-48-39547	hallmark;refseq	53;38;5;10	Viruses;dsDNA viruses no RNA stage;Caudovirales;Siphoviridae;unknown;unknown	Bacteria;Firmicutes;Bacilli;Lactobacillales;Streptococcaceae;Streptococcus	Streptococcus agalactiae MRI Z1-048	prophage	linear	Cluster_88
Bacilli_gi_481028372-8461-39542	hallmark;refseq	42;32;5;5	Viruses;unclassified;unclassified;unclassified;unclassified;unknown	Bacteria;Firmicutes;Bacilli;Lactobacillales;Streptococcaceae;Streptococcus	Streptococcus agalactiae MRI Z1-048	prophage	linear	Cluster_65
Bacilli_gi_481028636	hallmark;refseq	26;14;6;6	Viruses;dsDNA viruses no RNA stage;Caudovirales;Siphoviridae;Lambdalikevirus;unknown	Bacteria;Firmicutes;Bacilli;Lactobacillales;Streptococcaceae;Streptococcus	Streptococcus agalactiae MRI Z1-209	extrachromosomal	linear	Cluster_20
Bacilli_gi_481028700	refseq;vdb	11;5;2;4	Viruses;dsDNA viruses no RNA stage;Caudovirales;Siphoviridae;unknown;unknown	Bacteria;Firmicutes;Bacilli;Lactobacillales;Streptococcaceae;Streptococcus	Streptococcus agalactiae MRI Z1-215	extrachromosomal	linear	Cluster_20
Bacilli_gi_481028723	hallmark;refseq	40;30;1;9	Viruses;dsDNA viruses no RNA stage;Caudovirales;Siphoviridae;unknown;unknown	Bacteria;Firmicutes;Bacilli;Lactobacillales;Streptococcaceae;Streptococcus	Streptococcus agalactiae MRI Z1-217	extrachromosomal	linear	Cluster_62
Bacilli_gi_481028754	hallmark;refseq	18;9;5;4	Viruses;dsDNA viruses no RNA stage;Caudovirales;Siphoviridae;Lambdalikevirus;unknown	Bacteria;Firmicutes;Bacilli;Lactobacillales;Streptococcaceae;Streptococcus	Streptococcus agalactiae MRI Z1-217	extrachromosomal	linear	Cluster_20
Bacilli_gi_481028771	refseq	10;7;1;2	Viruses;dsDNA viruses no RNA stage;Caudovirales;Siphoviridae;unclassified;unknown	Bacteria;Firmicutes;Bacilli;Lactobacillales;Streptococcaceae;Streptococcus	Streptococcus agalactiae MRI Z1-217	extrachromosomal	linear	Cluster_20
Bacilli_gi_481029021	refseq	26;18;1;7	Viruses;dsDNA viruses no RNA stage;Caudovirales;Siphoviridae;unknown;unknown	Bacteria;Firmicutes;Bacilli;Lactobacillales;Streptococcaceae;Streptococcus	Streptococcus agalactiae LDS 623	extrachromosomal	linear	Cluster_65
Bacilli_gi_481029062	hallmark;refseq	19;16;1;2	Viruses;dsDNA viruses no RNA stage;Caudovirales;Siphoviridae;unclassified;unknown	Bacteria;Firmicutes;Bacilli;Lactobacillales;Streptococcaceae;Streptococcus	Streptococcus agalactiae LDS 623	extrachromosomal	linear	Cluster_68
Bacilli_gi_481029200	hallmark;refseq	19;11;3;5	Viruses;dsDNA viruses no RNA stage;Caudovirales;Siphoviridae;Lambdalikevirus;unknown	Bacteria;Firmicutes;Bacilli;Lactobacillales;Streptococcaceae;Streptococcus	Streptococcus agalactiae str. Gottschalk 13227	extrachromosomal	linear	Cluster_20
Bacilli_gi_481029207	refseq	13;7;4;2	Viruses;dsDNA viruses no RNA stage;Caudovirales;Siphoviridae;unknown;unknown	Bacteria;Firmicutes;Bacilli;Lactobacillales;Streptococcaceae;Streptococcus	Streptococcus agalactiae str. Gottschalk 13227	extrachromosomal	linear	Cluster_20
Bacilli_gi_481029223-8094-48204	hallmark;refseq	68;43;7;18	Viruses;dsDNA viruses no RNA stage;Caudovirales;Siphoviridae;C2likevirus;unknown	Bacteria;Firmicutes;Bacilli;Lactobacillales;Streptococcaceae;Streptococcus	Streptococcus agalactiae str. Gottschalk 13227	prophage	linear	Cluster_62
Bacilli_gi_481029264	hallmark;refseq	51;21;14;16	Viruses;dsDNA viruses no RNA stage;Caudovirales;Siphoviridae;unclassified;unknown	Bacteria;Firmicutes;Bacilli;Lactobacillales;Streptococcaceae;Streptococcus	Streptococcus agalactiae str. Gottschalk 2864	extrachromosomal	linear	Cluster_20
Bacilli_gi_481029337-105603-137394	hallmark;refseq	46;32;5;9	Viruses;dsDNA viruses no RNA stage;Caudovirales;Siphoviridae;unknown;unknown	Bacteria;Firmicutes;Bacilli;Lactobacillales;Streptococcaceae;Streptococcus	Streptococcus agalactiae str. Gottschalk 998A	prophage	linear	Cluster_30
Bacilli_gi_481029451-7712-47449	hallmark;refseq;vdb	67;42;7;18	Viruses;dsDNA viruses no RNA stage;Caudovirales;Siphoviridae;C2likevirus;unknown	Bacteria;Firmicutes;Bacilli;Lactobacillales;Streptococcaceae;Streptococcus	Streptococcus agalactiae FSL F2-338	prophage	linear	Cluster_62
Bacilli_gi_481029496-0-19298	hallmark;refseq;vdb	19;13;3;3	Viruses;dsDNA viruses no RNA stage;Caudovirales;Siphoviridae;unclassified;unknown	Bacteria;Firmicutes;Bacilli;Lactobacillales;Streptococcaceae;Streptococcus	Streptococcus agalactiae FSL S3-568	prophage	linear	Cluster_20
Bacilli_gi_481029515	hallmark;refseq;vdb	21;14;3;4	Viruses;dsDNA viruses no RNA stage;Caudovirales;Siphoviridae;unknown;unknown	Bacteria;Firmicutes;Bacilli;Lactobacillales;Streptococcaceae;Streptococcus	Streptococcus agalactiae FSL S3-568	extrachromosomal	linear	Cluster_52
Bacilli_gi_481029706	hallmark;refseq	9;6;1;2	Viruses;dsDNA viruses no RNA stage;Caudovirales;Siphoviridae;unknown;unknown	Bacteria;Firmicutes;Bacilli;Lactobacillales;Streptococcaceae;Streptococcus	Streptococcus agalactiae FSL S3-128	extrachromosomal	linear	Cluster_88
Bacilli_gi_481029738	hallmark;refseq	28;15;8;5	Viruses;dsDNA viruses no RNA stage;Caudovirales;Siphoviridae;unclassified;unknown	Bacteria;Firmicutes;Bacilli;Lactobacillales;Streptococcaceae;Streptococcus	Streptococcus agalactiae FSL S3-128	extrachromosomal	linear	Cluster_20
Bacilli_gi_481029743	hallmark;refseq	13;11;2;	Viruses;dsDNA viruses no RNA stage;Caudovirales;Siphoviridae;unknown;unknown	Bacteria;Firmicutes;Bacilli;Lactobacillales;Streptococcaceae;Streptococcus	Streptococcus agalactiae FSL S3-128	extrachromosomal	linear	Cluster_68
Bacilli_gi_481029813	refseq;vdb	14;5;3;6	Viruses;dsDNA viruses no RNA stage;Caudovirales;Siphoviridae;unknown;unknown	Bacteria;Firmicutes;Bacilli;Lactobacillales;Streptococcaceae;Streptococcus	Streptococcus agalactiae FSL S3-043	extrachromosomal	linear	Cluster_20
Bacilli_gi_481030040	hallmark;refseq	34;23;1;10	Viruses;dsDNA viruses no RNA stage;Caudovirales;Siphoviridae;unknown;unknown	Bacteria;Firmicutes;Bacilli;Lactobacillales;Streptococcaceae;Streptococcus	Streptococcus agalactiae FSL S3-027	extrachromosomal	linear	Cluster_62
Bacilli_gi_481030079-3467-44414	hallmark;refseq	46;22;8;16	Viruses;dsDNA viruses no RNA stage;Caudovirales;Siphoviridae;unclassified;unknown	Bacteria;Firmicutes;Bacilli;Lactobacillales;Streptococcaceae;Streptococcus	Streptococcus agalactiae FSL S3-027	prophage	linear	Cluster_20
Bacilli_gi_481030140	hallmark;refseq	79;53;14;12	Viruses;dsDNA viruses no RNA stage;Caudovirales;Siphoviridae;C2likevirus;unknown	Bacteria;Firmicutes;Bacilli;Lactobacillales;Streptococcaceae;Streptococcus	Streptococcus agalactiae FSL S3-229	extrachromosomal	linear	Cluster_52
Bacilli_gi_481030151	hallmark;refseq	55;22;14;19	Viruses;dsDNA viruses no RNA stage;Caudovirales;Siphoviridae;unknown;unknown	Bacteria;Firmicutes;Bacilli;Lactobacillales;Streptococcaceae;Streptococcus	Streptococcus agalactiae FSL S3-229	extrachromosomal	linear	Cluster_20
Bacilli_gi_481030213	hallmark;refseq	9;6;1;2	Viruses;dsDNA viruses no RNA stage;Caudovirales;Siphoviridae;unknown;unknown	Bacteria;Firmicutes;Bacilli;Lactobacillales;Streptococcaceae;Streptococcus	Streptococcus agalactiae FSL S3-222	extrachromosomal	linear	Cluster_88
Bacilli_gi_481030245	hallmark;refseq	28;15;8;5	Viruses;dsDNA viruses no RNA stage;Caudovirales;Siphoviridae;unclassified;unknown	Bacteria;Firmicutes;Bacilli;Lactobacillales;Streptococcaceae;Streptococcus	Streptococcus agalactiae FSL S3-222	extrachromosomal	linear	Cluster_20
Bacilli_gi_481030250	hallmark;refseq	13;11;2;	Viruses;dsDNA viruses no RNA stage;Caudovirales;Siphoviridae;unknown;unknown	Bacteria;Firmicutes;Bacilli;Lactobacillales;Streptococcaceae;Streptococcus	Streptococcus agalactiae FSL S3-222	extrachromosomal	linear	Cluster_68
Bacilli_gi_481030309	hallmark;refseq	54;21;14;19	Viruses;dsDNA viruses no RNA stage;Caudovirales;Siphoviridae;unknown;unknown	Bacteria;Firmicutes;Bacilli;Lactobacillales;Streptococcaceae;Streptococcus	Streptococcus agalactiae FSL S3-654	extrachromosomal	linear	Cluster_20
Bacilli_gi_481030547	hallmark;refseq	53;21;14;18	Viruses;dsDNA viruses no RNA stage;Caudovirales;Siphoviridae;unknown;unknown	Bacteria;Firmicutes;Bacilli;Lactobacillales;Streptococcaceae;Streptococcus	Streptococcus agalactiae FSL S3-034	extrachromosomal	linear	Cluster_20
Bacilli_gi_481030601	hallmark;refseq	15;13;2;	Viruses;dsDNA viruses no RNA stage;Caudovirales;Siphoviridae;unclassified;unknown	Bacteria;Firmicutes;Bacilli;Lactobacillales;Streptococcaceae;Streptococcus	Streptococcus agalactiae FSL S3-034	extrachromosomal	linear	Cluster_68
Bacilli_gi_481030641-350-39095	hallmark;refseq	43;21;7;15	Viruses;dsDNA viruses no RNA stage;Caudovirales;Siphoviridae;unclassified;unknown	Bacteria;Firmicutes;Bacilli;Lactobacillales;Streptococcaceae;Streptococcus	Streptococcus agalactiae FSL S3-608	prophage	linear	Cluster_20
Bacilli_gi_481030684	hallmark;refseq	31;24;2;5	Viruses;dsDNA viruses no RNA stage;Caudovirales;Siphoviridae;unknown;unknown	Bacteria;Firmicutes;Bacilli;Lactobacillales;Streptococcaceae;Streptococcus	Streptococcus agalactiae FSL S3-608	extrachromosomal	linear	Cluster_68
Bacilli_gi_481030819-8255-50073	hallmark;refseq	47;21;8;18	Viruses;dsDNA viruses no RNA stage;Caudovirales;Siphoviridae;unknown;unknown	Bacteria;Firmicutes;Bacilli;Lactobacillales;Streptococcaceae;Streptococcus	Streptococcus agalactiae LMG 14747	prophage	linear	Cluster_20
Bacilli_gi_481030874	hallmark;refseq;vdb	53;21;14;18	Viruses;dsDNA viruses no RNA stage;Caudovirales;Siphoviridae;unclassified;unknown	Bacteria;Firmicutes;Bacilli;Lactobacillales;Streptococcaceae;Streptococcus	Streptococcus agalactiae LMG 14747	extrachromosomal	linear	Cluster_20
Bacilli_gi_481030940	hallmark;refseq	50;20;13;17	Viruses;dsDNA viruses no RNA stage;Caudovirales;Siphoviridae;unclassified;unknown	Bacteria;Firmicutes;Bacilli;Lactobacillales;Streptococcaceae;Streptococcus	Streptococcus agalactiae STIR-CD-01	extrachromosomal	linear	Cluster_20
Bacilli_gi_481030972	hallmark;refseq	44;26;3;15	Viruses;dsDNA viruses no RNA stage;Caudovirales;Siphoviridae;unknown;unknown	Bacteria;Firmicutes;Bacilli;Lactobacillales;Streptococcaceae;Streptococcus	Streptococcus agalactiae FSL S3-062	extrachromosomal	linear	Cluster_30
Bacilli_gi_481031090-9622-51044	hallmark;refseq	42;21;10;11	Viruses;dsDNA viruses no RNA stage;Caudovirales;Siphoviridae;unclassified;unknown	Bacteria;Firmicutes;Bacilli;Lactobacillales;Streptococcaceae;Streptococcus	Streptococcus agalactiae MRI Z1-205	prophage	linear	Cluster_20
Bacilli_gi_481031108-494107-530520	hallmark;refseq	60;38;;22	Viruses;dsDNA viruses no RNA stage;Caudovirales;Siphoviridae;unknown;unknown	Bacteria;Firmicutes;Bacilli;Lactobacillales;Streptococcaceae;Streptococcus	Streptococcus agalactiae MRI Z1-204	prophage	linear	Cluster_65
Bacilli_gi_481031290-10600-42061	hallmark;refseq	45;32;3;10	Viruses;dsDNA viruses no RNA stage;Caudovirales;Siphoviridae;unknown;unknown	Bacteria;Firmicutes;Bacilli;Lactobacillales;Streptococcaceae;Streptococcus	Streptococcus agalactiae GB01003	prophage	linear	Cluster_166
Bacilli_gi_481031361	hallmark;refseq;vdb	52;29;14;9	Viruses;dsDNA viruses no RNA stage;Caudovirales;Siphoviridae;unclassified;unknown	Bacteria;Firmicutes;Bacilli;Lactobacillales;Streptococcaceae;Streptococcus	Streptococcus agalactiae GB00965	extrachromosomal	linear	Cluster_62
Bacilli_gi_481031398-68858-104967	hallmark;refseq	49;37;2;10	Viruses;dsDNA viruses no RNA stage;Caudovirales;Siphoviridae;unknown;unknown	Bacteria;Firmicutes;Bacilli;Lactobacillales;Streptococcaceae;Streptococcus	Streptococcus agalactiae GB00963	prophage	linear	Cluster_88
Bacilli_gi_481031461-7548-45586	hallmark;refseq	64;40;6;18	Viruses;dsDNA viruses no RNA stage;Caudovirales;Siphoviridae;C2likevirus;unknown	Bacteria;Firmicutes;Bacilli;Lactobacillales;Streptococcaceae;Streptococcus	Streptococcus agalactiae GB00954	prophage	linear	Cluster_62
Bacilli_gi_481031519	refseq;vdb	14;4;8;2	Viruses;unclassified;unclassified;unclassified;unclassified;unknown	Bacteria;Firmicutes;Bacilli;Lactobacillales;Streptococcaceae;Streptococcus	Streptococcus agalactiae GB00954	extrachromosomal	linear	Cluster_500
Bacilli_gi_481031635-91148-123376	hallmark;refseq	47;33;6;8	Viruses;dsDNA viruses no RNA stage;Caudovirales;Siphoviridae;unknown;unknown	Bacteria;Firmicutes;Bacilli;Lactobacillales;Streptococcaceae;Streptococcus	Streptococcus agalactiae GB00919	prophage	linear	Cluster_30
Bacilli_gi_481031663	hallmark;refseq	17;16;;1	Viruses;dsDNA viruses no RNA stage;Caudovirales;Siphoviridae;unclassified;unknown	Bacteria;Firmicutes;Bacilli;Lactobacillales;Streptococcaceae;Streptococcus	Streptococcus agalactiae GB00900	extrachromosomal	linear	Cluster_68
Bacilli_gi_481031687-841-44503	hallmark;refseq	44;21;9;14	Viruses;dsDNA viruses no RNA stage;Caudovirales;Siphoviridae;unknown;unknown	Bacteria;Firmicutes;Bacilli;Lactobacillales;Streptococcaceae;Streptococcus	Streptococcus agalactiae GB00900	prophage	linear	Cluster_20
Bacilli_gi_481031689	refseq	22;11;5;6	Viruses;dsDNA viruses no RNA stage;Caudovirales;Siphoviridae;unknown;unknown	Bacteria;Firmicutes;Bacilli;Lactobacillales;Streptococcaceae;Streptococcus	Streptococcus agalactiae GB00900	extrachromosomal	linear	Cluster_62
Bacilli_gi_481031694	hallmark;refseq	18;14;;4	Viruses;dsDNA viruses no RNA stage;Caudovirales;Siphoviridae;unknown;unknown	Bacteria;Firmicutes;Bacilli;Lactobacillales;Streptococcaceae;Streptococcus	Streptococcus agalactiae GB00900	extrachromosomal	linear	Cluster_30
Bacilli_gi_481031704-0-30951	hallmark;refseq	45;32;3;10	Viruses;dsDNA viruses no RNA stage;Caudovirales;Siphoviridae;unknown;unknown	Bacteria;Firmicutes;Bacilli;Lactobacillales;Streptococcaceae;Streptococcus	Streptococcus agalactiae GB00900	prophage	linear	Cluster_166
Bacilli_gi_482599575	hallmark;refseq	49;22;12;15	Viruses;dsDNA viruses no RNA stage;Caudovirales;Siphoviridae;unclassified;unknown	Bacteria;Firmicutes;Bacilli;Lactobacillales;Streptococcaceae;Streptococcus	Streptococcus agalactiae PR06	extrachromosomal	linear	Cluster_20
Bacilli_gi_483257455	hallmark;refseq	73;30;17;26	Viruses;dsDNA viruses no RNA stage;Caudovirales;Siphoviridae;unknown;unknown	Bacteria;Firmicutes;Bacilli;Lactobacillales;Streptococcaceae;Lactococcus	Lactococcus garvieae I113	extrachromosomal	linear	Cluster_195
Bacilli_gi_483380334-0-25984	hallmark;refseq	38;28;3;7	Viruses;dsDNA viruses no RNA stage;Caudovirales;Siphoviridae;unknown;unknown	Bacteria;Firmicutes;Bacilli;Lactobacillales;Enterococcaceae;Enterococcus	Enterococcus cecorum DSM 20682 = ATCC 43198	prophage	linear	Cluster_57
Bacilli_gi_483401861	hallmark;refseq	28;18;1;9	Viruses;dsDNA viruses no RNA stage;Caudovirales;Siphoviridae;Lambdalikevirus;unknown	Bacteria;Firmicutes;Bacilli;Bacillales;Paenibacillaceae;Brevibacillus	Brevibacillus brevis FJAT-0809-GLX	extrachromosomal	linear	Cluster_29
Bacilli_gi_483535096	hallmark;refseq	51;33;4;14	Viruses;dsDNA viruses no RNA stage;Caudovirales;Siphoviridae;unclassified;unknown	Bacteria;Firmicutes;Bacilli;Lactobacillales;Streptococcaceae;Streptococcus	Streptococcus caballi DSM 19004	extrachromosomal	circular	Cluster_31
Bacilli_gi_483609091	hallmark;refseq	26;20;1;5	Viruses;dsDNA viruses no RNA stage;Caudovirales;Siphoviridae;unclassified;unknown	Bacteria;Firmicutes;Bacilli;Lactobacillales;Streptococcaceae;Streptococcus	Streptococcus ovis DSM 16829	extrachromosomal	linear	Cluster_17
Bacilli_gi_483613946-212003-252391	hallmark;refseq	59;37;4;18	Viruses;dsDNA viruses no RNA stage;Caudovirales;Siphoviridae;unknown;unknown	Bacteria;Firmicutes;Bacilli;Lactobacillales;Streptococcaceae;Streptococcus	Streptococcus thoraltensis DSM 12221	prophage	linear	Cluster_88
Bacilli_gi_483984334	hallmark;refseq	65;57;4;4	Viruses;dsDNA viruses no RNA stage;Caudovirales;Siphoviridae;unclassified;unknown	Bacteria;Firmicutes;Bacilli;Bacillales;Staphylococcaceae;Staphylococcus	Staphylococcus epidermidis 12142587	extrachromosomal	linear	Cluster_8
Bacilli_gi_483992661	hallmark;refseq	35;24;4;7	Viruses;dsDNA viruses no RNA stage;Caudovirales;Siphoviridae;unclassified;unknown	Bacteria;Firmicutes;Bacilli;Bacillales;Bacillaceae;Bacillus	Bacillus licheniformis CGMCC 3963	extrachromosomal	linear	Cluster_6
Bacilli_gi_483992683	refseq	49;18;3;28	Viruses;dsDNA viruses no RNA stage;Caudovirales;Myoviridae;T4likevirus;unknown	Bacteria;Firmicutes;Bacilli;Bacillales;Bacillaceae;Bacillus	Bacillus licheniformis CGMCC 3963	extrachromosomal	linear	Cluster_407
Bacilli_gi_483992709-116952-143462	hallmark;refseq	35;18;9;8	Viruses;dsDNA viruses no RNA stage;Caudovirales;unclassified;unclassified;unknown	Bacteria;Firmicutes;Bacilli;Bacillales;Bacillaceae;Bacillus	Bacillus licheniformis CGMCC 3963	prophage	linear	Cluster_105
Bacilli_gi_483992947-10153-49378	refseq	62;36;2;24	Viruses;dsDNA viruses no RNA stage;Caudovirales;Siphoviridae;unclassified;unclassified	Bacteria;Firmicutes;Bacilli;Bacillales;Bacillaceae;Bacillus	Bacillus licheniformis CGMCC 3963	prophage	linear	Cluster_253
Bacilli_gi_483993038	hallmark;refseq	19;14;1;4	Viruses;dsDNA viruses no RNA stage;Caudovirales;Siphoviridae;Lambdalikevirus;unknown	Bacteria;Firmicutes;Bacilli;Bacillales;Bacillaceae;Bacillus	Bacillus licheniformis CGMCC 3963	extrachromosomal	linear	Cluster_55
Bacilli_gi_483993112	hallmark;refseq	19;17;;2	Viruses;dsDNA viruses no RNA stage;Caudovirales;Siphoviridae;Lambdalikevirus;unknown	Bacteria;Firmicutes;Bacilli;Bacillales;Bacillaceae;Bacillus	Bacillus licheniformis CGMCC 3963	extrachromosomal	linear	Cluster_55
Bacilli_gi_484000369	hallmark;refseq;vdb	43;15;18;10	Viruses;dsDNA viruses no RNA stage;Caudovirales;Siphoviridae;Lambdalikevirus;unknown	Bacteria;Firmicutes;Bacilli;Bacillales;Bacillaceae;Bacillus	Bacillus acidiproducens DSM 23148	extrachromosomal	linear	Cluster_42
Bacilli_gi_484000434	hallmark;refseq	50;31;3;16	Viruses;unclassified;unclassified;unclassified;unclassified;unknown	Bacteria;Firmicutes;Bacilli;Bacillales;Bacillaceae;Bacillus	Bacillus acidiproducens DSM 23148	extrachromosomal	circular	Cluster_145
Bacilli_gi_484002915-0-51593	hallmark;refseq	90;36;9;45	Viruses;dsDNA viruses no RNA stage;Caudovirales;unclassified;unclassified;unknown	Bacteria;Firmicutes;Bacilli;Bacillales;Paenibacillaceae;Brevibacillus	Brevibacillus laterosporus DSM 25	prophage	linear	Cluster_15
Bacilli_gi_484009374	hallmark	15;5;5;5	Viruses;dsDNA viruses no RNA stage;Caudovirales;Siphoviridae;Lambdalikevirus;unknown	Bacteria;Firmicutes;Bacilli;Lactobacillales;Enterococcaceae;Enterococcus	Enterococcus faecium LCT-EF20	extrachromosomal	linear	Cluster_336
Bacilli_gi_484009523-0-25503	hallmark;refseq	47;26;5;16	Viruses;dsDNA viruses no RNA stage;Caudovirales;Siphoviridae;unknown;unknown	Bacteria;Firmicutes;Bacilli;Lactobacillales;Enterococcaceae;Enterococcus	Enterococcus faecium LCT-EF20	prophage	linear	Cluster_41
Bacilli_gi_484009620	hallmark	15;5;5;5	Viruses;dsDNA viruses no RNA stage;Caudovirales;Siphoviridae;Lambdalikevirus;unknown	Bacteria;Firmicutes;Bacilli;Lactobacillales;Enterococcaceae;Enterococcus	Enterococcus faecium LCT-EF258	extrachromosomal	linear	Cluster_336
Bacilli_gi_484019068	hallmark;refseq	24;18;3;3	Viruses;dsDNA viruses no RNA stage;Caudovirales;Siphoviridae;unknown;unknown	Bacteria;Firmicutes;Bacilli;Bacillales;Bacillaceae;Bacillus	Bacillus sp. 105MF	extrachromosomal	linear	Cluster_135
Bacilli_gi_484019240	refseq	33;20;2;11	Viruses;dsDNA viruses no RNA stage;Caudovirales;unclassified;unknown;unknown	Bacteria;Firmicutes;Bacilli;Bacillales;Bacillaceae;Bacillus	Bacillus sp. 105MF	extrachromosomal	linear	Cluster_116
Bacilli_gi_484028336	hallmark	79;22;10;47	Viruses;dsDNA viruses no RNA stage;Caudovirales;Siphoviridae;unknown;unknown	Bacteria;Firmicutes;Bacilli;Bacillales;Paenibacillaceae;Brevibacillus	Brevibacillus massiliensis	extrachromosomal	linear	Cluster_526
Bacilli_gi_484031409	hallmark;refseq	25;20;3;2	Viruses;dsDNA viruses no RNA stage;Caudovirales;Siphoviridae;unclassified;unknown	Bacteria;Firmicutes;Bacilli;Bacillales;Staphylococcaceae;Staphylococcus	Staphylococcus delphini 8086	extrachromosomal	linear	Cluster_56
Bacilli_gi_484031751	hallmark;refseq	38;33;2;3	Viruses;dsDNA viruses no RNA stage;Caudovirales;Siphoviridae;Lambdalikevirus;unknown	Bacteria;Firmicutes;Bacilli;Bacillales;Staphylococcaceae;Staphylococcus	Staphylococcus delphini 8086	extrachromosomal	linear	Cluster_49
Bacilli_gi_484032088	hallmark	28;10;1;17	Viruses;dsDNA viruses no RNA stage;Caudovirales;Siphoviridae;unknown;unknown	Bacteria;Firmicutes;Bacilli;Bacillales;Bacillaceae;Bacillus	Bacillus sp. WBUNB009	extrachromosomal	linear	Cluster_150
Bacilli_gi_484032490	hallmark;refseq	78;46;8;24	Viruses;dsDNA viruses no RNA stage;Caudovirales;Siphoviridae;unknown;unknown	Bacteria;Firmicutes;Bacilli;Bacillales;Staphylococcaceae;Staphylococcus	Staphylococcus intermedius NCTC 11048	extrachromosomal	linear	Cluster_8
Bacilli_gi_484032532	hallmark;refseq	22;21;1;	Viruses;dsDNA viruses no RNA stage;Caudovirales;Siphoviridae;unknown;unknown	Bacteria;Firmicutes;Bacilli;Bacillales;Staphylococcaceae;Staphylococcus	Staphylococcus intermedius NCTC 11048	extrachromosomal	linear	Cluster_40
[truncated: 11,056 more rows]
