# Supplementary material for: Viral dark matter and virus–host interactions resolved from publicly available microbial genomes
Source: eLife. 2015 Jul 22;4:e08490. doi: 10.7554/eLife.08490 (PMC4533152; doi:10.7554/eLife.08490)
Supplement: Figure 2—source data 1. — Cluster affiliation is based on the combination of BLAST-based taxonomic affiliation of its members. For VCs with more than 10 proteins, those composed only of VirSorter sequences are highlighted in green and those with only one sequence from RefSeqABVir are marked in blue. Cases where sequences affiliated to both ssDNA and dsDNA viruses are clustered together are highlighted in red. ‘Detection tags’ lists the different detection tags for the cluster members, with ‘NCBI_RefSeq’ for complete genomes from the RefSeq database. These NCBI RefSeq sequences are counted as ‘complete’ in the ‘type of sequences’ column. DOI: http://dx.doi.org/10.7554/eLife.08490.010 [file elife08490s004.xls]

## Sheet: Sheet1
Cluster Id	Number of sequences	Number of VirSorter sequences	Composition of detection tags	Affiliation of viral sequences	Affiliation of associated hosts	Type of sequences	Structure of sequences	Origin of sequences	Maxinum number of proteins on one sequence
Cluster_0	1526	1500	hallmark(1483),vdb(74),NCBI_RefSeq(26),noncaudo(1),refseq(1461)	Viruses(1526);unclassified(32),dsDNA viruses no RNA stage(1494);unclassified(32),Caudovirales(1494);Siphoviridae(58),unclassified(211),Myoviridae(1256);Spounalikevirus(1),Mulikevirus(4),(15),Lambdalikevirus(51),unknown(215),unclassified(392),Hpunalikevirus(826);unclassified(30),unknown(1470)	Bacteria(1526);Planctomycetes(1),Firmicutes(1),Proteobacteria(1524);Bacilli(1),Planctomycetia(1),Zetaproteobacteria(1),Epsilonproteobacteria(3),Alphaproteobacteria(17),Betaproteobacteria(56),Gammaproteobacteria(1447);Lactobacillales(1),Oceanospirillales(1),Planctomycetales(1),Chromatiales(1),Thiotrichales(1),Rhodospirillales(2),Neisseriales(2),Rhodobacterales(2),Campylobacterales(3),unknown(5),Rh…	prophage(1007),complete(26),extrachromosomal(493)	circular (9) linear (1491)	RefSeq(26),VirSorter(1500)	108
Cluster_1	1360	1349	hallmark(1186),vdb(73),NCBI_RefSeq(11),refseq(1336)	Viruses(1360);unclassified phages(9),unclassified(45),dsDNA viruses no RNA stage(1306);(8),unclassified(45),Caudovirales(1306);Myoviridae(3),Podoviridae(3),(8),unclassified(290),Siphoviridae(1055);Hpunalikevirus(1),N15likevirus(1),unknown(3),(33),Lambdalikevirus(446),unclassified(875);unknown(482),unclassified(867)	Bacteria(1360);Nitrospinae(1),Proteobacteria(1359);Deltaproteobacteria(1),Nitrospinia(1),Betaproteobacteria(3),Alphaproteobacteria(4),Gammaproteobacteria(1351);Burkholderiales(1),Rhodospirillales(1),Rhodocyclales(1),Aeromonadales(1),Desulfovibrionales(1),Caulobacterales(1),unknown(1),Neisseriales(1),Nitrospinales(1),Pasteurellales(2),Rhizobiales(2),Pseudomonadales(3),Vibrionales(4),Enterobacteria…	prophage(542),complete(11),extrachromosomal(807)	circular (7) linear (1342)	RefSeq(11),VirSorter(1349)	101
Cluster_2	555	553	hallmark(548),vdb(27),NCBI_RefSeq(2),refseq(529)	Viruses(555);unclassified(6),unclassified phages(6),dsDNA viruses no RNA stage(543);(4),unclassified(6),Caudovirales(543);(4),unclassified(21),Siphoviridae(528);(6),Lambdalikevirus(134),unclassified(413);unknown(143),unclassified(410)	Bacteria(555);Actinobacteria(1),Spirochaetes(2),Proteobacteria(552);Alphaproteobacteria(1),Actinobacteria(1),Spirochaetia(2),Gammaproteobacteria(551);Actinomycetales(1),Alteromonadales(1),unknown(1),Oceanospirillales(1),Rhodobacterales(1),Vibrionales(2),Spirochaetales(2),Pasteurellales(14),Enterobacteriales(532);unknown(1),Microbacteriaceae(1),Halomonadaceae(1),Rhodobacteraceae(1),Alteromonadacea…	prophage(168),complete(2),extrachromosomal(385)	circular (2) linear (551)	RefSeq(2),VirSorter(553)	100
Cluster_3	466	453	hallmark(436),vdb(26),NCBI_RefSeq(13),noncaudo(1),refseq(416)	Viruses(466);unclassified(1),dsDNA viruses no RNA stage(465);unclassified(5),Caudovirales(459);unknown(1),Podoviridae(1),Siphoviridae(17),unclassified(180),Myoviridae(264);Hpunalikevirus(1),Lambdalikevirus(13),(31),Mulikevirus(114),unknown(120),unclassified(176);unclassified(92),unknown(361)	Bacteria(466);Bacteroidetes(1),Spirochaetes(3),Proteobacteria(462);Flavobacteriia(1),Deltaproteobacteria(1),Spirochaetia(3),Betaproteobacteria(3),Alphaproteobacteria(19),Gammaproteobacteria(439);Sphingomonadales(1),unknown(1),Desulfovibrionales(1),Flavobacteriales(1),Neisseriales(1),Thiotrichales(1),Burkholderiales(2),Aeromonadales(2),Rhizobiales(3),Spirochaetales(3),Pseudomonadales(5),Rhodobacte…	prophage(231),complete(13),extrachromosomal(222)	circular (2) linear (451)	RefSeq(13),VirSorter(453)	121
Cluster_4	466	443	hallmark(337),vdb(19),NCBI_RefSeq(23),noncaudo(1),refseq(422)	Viruses(466);unclassified phages(5),unclassified(7),dsDNA viruses no RNA stage(454);(1),unclassified(7),Caudovirales(453);(1),Podoviridae(1),Myoviridae(2),unclassified(133),Siphoviridae(324);unknown(4),(18),unclassified(128),Lambdalikevirus(308);unclassified(116),unknown(327)	Bacteria(466);Spirochaetes(1),Cyanobacteria(2),Bacteroidetes(4),Proteobacteria(459);Cytophagia(1),Spirochaetia(1),Flavobacteriia(1),Bacteroidia(2),unknown(2),Alphaproteobacteria(7),Betaproteobacteria(17),Gammaproteobacteria(435);Rhodospirillales(1),Spirochaetales(1),Sphingomonadales(1),Flavobacteriales(1),unknown(1),Cytophagales(1),Bacteroidales(2),Neisseriales(2),Thiotrichales(2),Chroococcales(2…	prophage(126),complete(23),extrachromosomal(317)	circular (3) linear (440)	RefSeq(23),VirSorter(443)	100
Cluster_5	388	378	hallmark(265),vdb(3),NCBI_RefSeq(10),refseq(374)	Viruses(388);unclassified phages(26),dsDNA viruses no RNA stage(362);unknown(25),Caudovirales(361);Siphoviridae(8),unknown(25),unclassified(38),Podoviridae(315);Lambdalikevirus(4),unclassified(13),unknown(26),(338);unclassified(40),unknown(338)	Bacteria(388);Proteobacteria(388);Alphaproteobacteria(1),Betaproteobacteria(1),Gammaproteobacteria(386);Rhizobiales(1),Thiotrichales(1),Nitrosomonadales(1),Aeromonadales(2),Vibrionales(6),Enterobacteriales(377);Thiotrichaceae(1),Nitrosomonadaceae(1),Bradyrhizobiaceae(1),Aeromonadaceae(2),Vibrionaceae(6),Enterobacteriaceae(377);Providencia(1),Thiothrix(1),Shigella(1),Yersinia(1),unknown(1),Nitroso…	prophage(137),complete(10),extrachromosomal(241)	circular (1) linear (377)	RefSeq(10),VirSorter(378)	88
Cluster_6	280	263	hallmark(247),vdb(3),NCBI_RefSeq(17),refseq(261)	Viruses(280);unclassified phages(1),dsDNA viruses no RNA stage(279);Caudovirales(279);unclassified(1),Siphoviridae(277);Phic3unalikevirus(1),Lambdalikevirus(16),unknown(22),unclassified(224);unclassified(1),unknown(262)	Bacteria(280);Fusobacteria(1),Actinobacteria(2),Proteobacteria(2),Firmicutes(275);Alphaproteobacteria(1),Gammaproteobacteria(1),Negativicutes(1),Fusobacteriia(1),Actinobacteria(2),Bacilli(274);Selenomonadales(1),Fusobacteriales(1),Vibrionales(1),Rhodospirillales(1),Actinomycetales(2),Lactobacillales(4),Bacillales(270);Vibrionaceae(1),Veillonellaceae(1),Lactobacillaceae(1),Frankiaceae(1),Gordoniac…	prophage(189),complete(17),extrachromosomal(74)	circular (2) linear (261)	RefSeq(17),VirSorter(263)	100
Cluster_7	239	229	hallmark(228),vdb(3),NCBI_RefSeq(10),refseq(227)	Viruses(239);unclassified phages(1),dsDNA viruses no RNA stage(238);unknown(1),Caudovirales(238);unknown(1),unclassified(2),Podoviridae(236);P22likevirus(2),unclassified(49),unknown(178);unknown(229)	Bacteria(239);Firmicutes(1),Proteobacteria(238);Negativicutes(1),Alphaproteobacteria(3),Betaproteobacteria(5),Gammaproteobacteria(230);Selenomonadales(1),Rhodospirillales(1),Xanthomonadales(1),Sphingomonadales(1),Rhodobacterales(1),Burkholderiales(5),Pseudomonadales(8),Enterobacteriales(221);Acidaminococcaceae(1),Rhodospirillaceae(1),Sphingomonadaceae(1),Burkholderiaceae(1),Xanthomonadaceae(1),Rh…	prophage(171),complete(10),extrachromosomal(58)	circular (6) linear (223)	RefSeq(10),VirSorter(229)	71
Cluster_8	229	189	hallmark(175),vdb(1),NCBI_RefSeq(40),refseq(188)	Viruses(229);unclassified phages(1),dsDNA viruses no RNA stage(228);Caudovirales(227);unclassified(1),Myoviridae(1),Siphoviridae(225);Lambdalikevirus(16),unknown(68),unclassified(105);unclassified(12),unknown(177)	Bacteria(229);Firmicutes(229);Bacilli(229);Lactobacillales(2),Bacillales(227);Bacillaceae(1),Lactobacillaceae(2),Staphylococcaceae(226);Bacillus(1),Lactobacillus(2),Staphylococcus(226)	prophage(145),complete(40),extrachromosomal(44)	linear (189)	RefSeq(40),VirSorter(189)	100
Cluster_9	228	227	hallmark(136),vdb(10),NCBI_RefSeq(1),refseq(226)	Viruses(228);unclassified(1),dsDNA viruses no RNA stage(227);unclassified(1),Caudovirales(227);Podoviridae(1),Myoviridae(5),unclassified(46),Siphoviridae(176);T7likevirus(1),T4likevirus(5),Lambdalikevirus(13),unknown(79),unclassified(129);unclassified(39),unknown(188)	Bacteria(228);Proteobacteria(228);Alphaproteobacteria(1),Gammaproteobacteria(227);Sphingomonadales(1),Pseudomonadales(17),Enterobacteriales(210);Sphingomonadaceae(1),Moraxellaceae(17),Enterobacteriaceae(210);Novosphingobium(1),Photorhabdus(1),Enterobacter(2),Salmonella(4),Klebsiella(8),Acinetobacter(17),Escherichia(38),Yersinia(157)	prophage(23),complete(1),extrachromosomal(204)	circular (5) linear (222)	RefSeq(1),VirSorter(227)	124
Cluster_10	224	224	hallmark(87),vdb(14),phage(220)	Viruses(224);unclassified(3),dsDNA viruses no RNA stage(221);unclassified(3),Caudovirales(221);Myoviridae(10),Siphoviridae(56),unclassified(158);unknown(3),Lambdalikevirus(46),(68),unclassified(107);unknown(54),unclassified(170)	Bacteria(224);Proteobacteria(224);Alphaproteobacteria(1),Gammaproteobacteria(223);Rhodobacterales(1),Enterobacteriales(223);Rhodobacteraceae(1),Enterobacteriaceae(223);Salmonella(1),Citrobacter(1),Rhodobacter(1),Klebsiella(1),Shigella(11),Escherichia(209)	prophage(45),extrachromosomal(179)	linear (224)	VirSorter(224)	100
Cluster_11	211	195	hallmark(191),vdb(9),NCBI_RefSeq(16),refseq(194)	Viruses(211);unclassified phages(1),dsDNA viruses no RNA stage(210);Caudovirales(210);Siphoviridae(3),unclassified(42),Podoviridae(165);Lambdalikevirus(3),unclassified(49),P22likevirus(153);unclassified(35),unknown(160)	Bacteria(211);Proteobacteria(210);Betaproteobacteria(1),Gammaproteobacteria(209);Burkholderiales(1),Enterobacteriales(209);Burkholderiaceae(1),Enterobacteriaceae(209);Pectobacterium(1),Citrobacter(1),Sodalis(1),Ralstonia(1),Shimwellia(1),Shigella(2),Candidatus Hamiltonella(2),unknown(2),Salmonella(56),Escherichia(143)	prophage(136),complete(16),extrachromosomal(59)	linear (195)	RefSeq(16),VirSorter(195)	71
Cluster_12	179	178	hallmark(1),NCBI_RefSeq(1),noncaudo(65),refseq(113)	Viruses(179);unclassified(1),ssDNA viruses(178);(1),unclassified(1),unknown(177);unclassified(1),Inoviridae(178);unclassified(1),Inovirus(178);unknown(178)	Bacteria(179);Proteobacteria(179);Gammaproteobacteria(179);Vibrionales(179);Vibrionaceae(179);Vibrio(179)	prophage(77),complete(1),extrachromosomal(101)	circular (3) linear (175)	RefSeq(1),VirSorter(178)	29
Cluster_13	144	143	hallmark(3),vdb(1),NCBI_RefSeq(1),noncaudo(106),refseq(37)	Viruses(144);unclassified phages(1),dsDNA viruses no RNA stage(3),unclassified(6),ssDNA viruses(134);(1),Caudovirales(3),unclassified(6),unknown(134);unknown(1),Myoviridae(3),unclassified(6),Inoviridae(134);unknown(2),Hpunalikevirus(2),unclassified(6),Inovirus(134);unclassified(1),unknown(142)	Bacteria(144);Proteobacteria(144);Gammaproteobacteria(144);Alteromonadales(1),Pseudomonadales(143);unknown(1),Pseudomonadaceae(143);unknown(1),Pseudomonas(143)	prophage(134),complete(1),extrachromosomal(9)	linear (143)	RefSeq(1),VirSorter(143)	36
Cluster_14	141	132	hallmark(79),vdb(1),NCBI_RefSeq(9),noncaudo(67),refseq(65)	Viruses(141);unclassified(1),dsDNA viruses no RNA stage(3),ssDNA viruses(137);unclassified(1),Caudovirales(3),(9),unknown(128);unclassified(1),Siphoviridae(1),Myoviridae(2),Inoviridae(137);unclassified(1),Lambdalikevirus(1),Hpunalikevirus(2),Inovirus(136);unknown(132)	Bacteria(141);Caldiserica(1),Proteobacteria(140);unknown(1),Betaproteobacteria(6),Gammaproteobacteria(134);unknown(1),Aeromonadales(1),Alteromonadales(6),Burkholderiales(6),Pseudomonadales(11),Vibrionales(116);Aeromonadaceae(1),Oxalobacteraceae(1),unknown(1),Alteromonadaceae(1),Pseudoalteromonadaceae(2),Burkholderiaceae(2),Shewanellaceae(3),Comamonadaceae(3),Pseudomonadaceae(11),Vibrionaceae(116)…	prophage(97),complete(9),extrachromosomal(35)	circular (2) linear (130)	RefSeq(9),VirSorter(132)	76
Cluster_15	129	126	hallmark(124),vdb(9),NCBI_RefSeq(3),refseq(123)	Viruses(129);dsDNA viruses no RNA stage(129);Caudovirales(129);unknown(1),Siphoviridae(32),Myoviridae(41),unclassified(54);unclassified(31),unknown(95);unknown(126)	Bacteria(129);Deinococcus-Thermus(1),Firmicutes(128);unknown(1),Deinococci(1),Negativicutes(4),Bacilli(11),Clostridia(112);Thermales(1),unknown(1),Selenomonadales(4),Lactobacillales(4),Bacillales(7),Clostridiales(112);Acidaminococcaceae(1),Ruminococcaceae(1),Carnobacteriaceae(1),Peptococcaceae(1),Thermaceae(1),Bacillaceae(1),Eubacteriaceae(2),unknown(2),Veillonellaceae(3),Streptococcaceae(3),Lach…	prophage(48),complete(3),extrachromosomal(78)	circular (2) linear (124)	RefSeq(3),VirSorter(126)	100
Cluster_16	125	124	hallmark(72),NCBI_RefSeq(1),refseq(124)	Viruses(125);dsDNA viruses no RNA stage(125);Caudovirales(125);Siphoviridae(1),Podoviridae(7),Myoviridae(25),unclassified(92);Mulikevirus(1),Lambdalikevirus(1),(12),Punalikevirus(22),unclassified(89);unknown(55),unclassified(69)	Bacteria(125);Proteobacteria(125);Gammaproteobacteria(125);Alteromonadales(1),Vibrionales(5),Enterobacteriales(119);Alteromonadaceae(1),Vibrionaceae(5),Enterobacteriaceae(119);Alteromonas(1),Pantoea(1),Vibrio(5),Salmonella(11),Escherichia(107)	prophage(5),complete(1),extrachromosomal(119)	circular (8) linear (116)	RefSeq(1),VirSorter(124)	121
Cluster_18	123	104	hallmark(104),vdb(1),NCBI_RefSeq(19),refseq(102)	Viruses(123);dsDNA viruses no RNA stage(123);Caudovirales(123);Myoviridae(1),Podoviridae(1),unclassified(4),Siphoviridae(117);unknown(1),(2),Tunalikevirus(8),Lambdalikevirus(22),unclassified(80);unknown(27),unclassified(77)	Bacteria(123);Proteobacteria(123);Betaproteobacteria(2),Gammaproteobacteria(121);Vibrionales(2),Burkholderiales(2),Pseudomonadales(16),Enterobacteriales(103);Burkholderiaceae(1),Comamonadaceae(1),Vibrionaceae(2),Pseudomonadaceae(16),Enterobacteriaceae(103);Salmonella(1),Delftia(1),unknown(1),Klebsiella(1),Sodalis(1),Ralstonia(1),Cronobacter(2),Citrobacter(2),Vibrio(2),Providencia(3),Shigella(4),E…	prophage(15),complete(19),extrachromosomal(89)	linear (104)	RefSeq(19),VirSorter(104)	98
Cluster_17	123	119	hallmark(109),vdb(8),NCBI_RefSeq(4),refseq(117)	Viruses(123);dsDNA viruses no RNA stage(123);Caudovirales(123);unclassified(2),Siphoviridae(121);(1),unclassified(8),unknown(110);unclassified(1),unknown(118)	Bacteria(123);Proteobacteria(6),Firmicutes(117);Alphaproteobacteria(1),unknown(1),Negativicutes(1),Erysipelotrichia(1),Clostridia(4),Gammaproteobacteria(5),Bacilli(110);Erysipelotrichales(1),Selenomonadales(1),Rhizobiales(1),Alteromonadales(1),unknown(1),Bacillales(3),Clostridiales(4),Enterobacteriales(4),Lactobacillales(107);Pseudoalteromonadaceae(1),Veillonellaceae(1),Erysipelotrichaceae(1),Pep…	prophage(100),complete(4),extrachromosomal(19)	circular (1) linear (118)	RefSeq(4),VirSorter(119)	67
Cluster_19	121	121	hallmark(45),vdb(4),noncaudo(2),phage(112)	Viruses(121);ssDNA viruses(1),unclassified phages(1),unclassified(2),dsDNA viruses no RNA stage(117);(1),unknown(1),unclassified(2),Caudovirales(117);(1),Inoviridae(1),Podoviridae(12),Siphoviridae(27),unclassified(33),Myoviridae(47);Inovirus(1),Spounalikevirus(1),Hpunalikevirus(2),(7),P22likevirus(9),unknown(11),Lambdalikevirus(17),Punalikevirus(24),unclassified(49);unclassified(25),unknown(96)	Bacteria(121);Firmicutes(3),Actinobacteria(5),Proteobacteria(113);Alphaproteobacteria(2),Betaproteobacteria(2),Bacilli(3),Actinobacteria(5),Gammaproteobacteria(109);Burkholderiales(1),Alteromonadales(1),Vibrionales(1),Lactobacillales(1),Neisseriales(1),Pasteurellales(2),Bacillales(2),Rhizobiales(2),Pseudomonadales(4),Actinomycetales(5),Enterobacteriales(101);Micrococcaceae(1),Mycobacteriaceae(1),…	prophage(28),extrachromosomal(93)	linear (121)	VirSorter(121)	113
Cluster_20	120	119	hallmark(109),vdb(15),NCBI_RefSeq(1),refseq(106)	Viruses(120);unclassified phages(1),dsDNA viruses no RNA stage(119);Caudovirales(119);unclassified(2),Siphoviridae(117);Phic3unalikevirus(1),(1),Lambdalikevirus(16),unknown(35),unclassified(66);unclassified(1),unknown(118)	Bacteria(120);Tenericutes(1),Planctomycetes(1),Chloroflexi(1),Proteobacteria(3),Actinobacteria(7),Firmicutes(107);Mollicutes(1),Planctomycetia(1),Betaproteobacteria(1),Thermomicrobia(1),Alphaproteobacteria(2),unknown(3),Actinobacteria(7),Clostridia(11),Bacilli(93);Actinomycetales(1),Burkholderiales(1),Rhodospirillales(1),Sphaerobacterales(1),Planctomycetales(1),Acholeplasmatales(1),Rhodobacterale…	prophage(35),complete(1),extrachromosomal(84)	circular (2) linear (117)	RefSeq(1),VirSorter(119)	102
Cluster_21	117	114	hallmark(100),vdb(6),NCBI_RefSeq(3),refseq(107)	Viruses(117);dsDNA viruses no RNA stage(117);Caudovirales(117);unclassified(25),Myoviridae(92);Hpunalikevirus(4),Mulikevirus(22),unclassified(35),unknown(53);unclassified(3),unknown(111)	Bacteria(117);Fusobacteria(2),Firmicutes(2),Proteobacteria(113);Alphaproteobacteria(1),Clostridia(2),Fusobacteriia(2),Deltaproteobacteria(3),Betaproteobacteria(12),Gammaproteobacteria(97);Rhodocyclales(1),Rhizobiales(1),Alteromonadales(1),Vibrionales(1),Fusobacteriales(2),Clostridiales(2),Desulfovibrionales(3),Neisseriales(4),Burkholderiales(7),Pseudomonadales(8),Pasteurellales(12),Enterobacteria…	prophage(37),complete(3),extrachromosomal(77)	linear (114)	RefSeq(3),VirSorter(114)	100
Cluster_22	113	113	hallmark(113),vdb(10),phage(112)	Viruses(113);dsDNA viruses no RNA stage(113);Caudovirales(113);Podoviridae(10),Myoviridae(35),unclassified(68);Mulikevirus(1),Hpunalikevirus(1),P22likevirus(10),unknown(32),unclassified(69);unclassified(2),unknown(111)	Bacteria(113);Bacteroidetes(1),Caldiserica(1),Proteobacteria(111);Bacteroidia(1),unknown(1),Betaproteobacteria(3),Gammaproteobacteria(108);Vibrionales(1),Burkholderiales(1),unknown(1),Bacteroidales(1),Neisseriales(2),Pasteurellales(3),Enterobacteriales(104);Rikenellaceae(1),Vibrionaceae(1),unknown(1),Comamonadaceae(1),Neisseriaceae(2),Pasteurellaceae(3),Enterobacteriaceae(104);Avibacterium(1),Chr…	prophage(100),extrachromosomal(13)	linear (113)	VirSorter(113)	64
Cluster_23	99	94	hallmark(75),vdb(1),NCBI_RefSeq(5),refseq(94)	Viruses(99);dsDNA viruses no RNA stage(99);Caudovirales(99);Podoviridae(2),unclassified(16),Siphoviridae(81);P22likevirus(2),Lambdalikevirus(11),unknown(12),unclassified(71);unclassified(17),unknown(77)	Bacteria(99);Proteobacteria(99);Gammaproteobacteria(99);Pseudomonadales(2),Enterobacteriales(97);Pseudomonadaceae(2),Enterobacteriaceae(97);Cronobacter(1),Hafnia(1),Pseudomonas(2),unknown(3),Enterobacter(3),Escherichia(10),Salmonella(79)	prophage(54),complete(5),extrachromosomal(40)	linear (94)	RefSeq(5),VirSorter(94)	104
Cluster_24	90	89	hallmark(86),vdb(2),NCBI_RefSeq(1),refseq(89)	Viruses(90);dsDNA viruses no RNA stage(90);Caudovirales(90);Podoviridae(4),unclassified(33),Siphoviridae(53);(5),Lambdalikevirus(16),unknown(19),unclassified(49);unclassified(36),unknown(53)	Bacteria(90);Proteobacteria(90);Gammaproteobacteria(90);Pseudomonadales(90);Moraxellaceae(90);Acinetobacter(90)	prophage(10),complete(1),extrachromosomal(79)	circular (3) linear (86)	RefSeq(1),VirSorter(89)	81
Cluster_25	89	85	hallmark(82),vdb(2),NCBI_RefSeq(4),refseq(85)	Viruses(89);dsDNA viruses no RNA stage(89);Caudovirales(87);Myoviridae(1),Siphoviridae(5),unclassified(81);Lambdalikevirus(2),unclassified(83);unknown(6),unclassified(79)	Bacteria(89);Proteobacteria(89);Gammaproteobacteria(89);Vibrionales(2),Enterobacteriales(87);Vibrionaceae(2),Enterobacteriaceae(87);Yokenella(1),Cronobacter(1),Raoultella(1),Serratia(1),Yersinia(1),Salmonella(2),Escherichia(2),Vibrio(2),Enterobacter(7),Klebsiella(71)	prophage(40),complete(4),extrachromosomal(45)	linear (85)	RefSeq(4),VirSorter(85)	83
Cluster_26	86	86	hallmark(85),vdb(3),phage(85)	Viruses(86);dsDNA viruses no RNA stage(86);Caudovirales(86);Myoviridae(1),Siphoviridae(21),unclassified(64);(1),unknown(4),Lambdalikevirus(11),unclassified(70);unknown(17),unclassified(69)	Bacteria(86);Proteobacteria(86);Alphaproteobacteria(1),Gammaproteobacteria(85);Rhizobiales(1),Pasteurellales(1),Pseudomonadales(4),Enterobacteriales(80);Brucellaceae(1),Pasteurellaceae(1),Pseudomonadaceae(4),Enterobacteriaceae(80);Salmonella(1),Ochrobactrum(1),Citrobacter(1),Haemophilus(1),Pseudomonas(4),Klebsiella(5),Escherichia(73)	prophage(32),extrachromosomal(54)	linear (86)	VirSorter(86)	76
Cluster_27	83	83	hallmark(1),phage(83)	Viruses(83);dsDNA viruses no RNA stage(83);Caudovirales(83);Siphoviridae(83);Lambdalikevirus(83);unknown(83)	Bacteria(83);Proteobacteria(83);Gammaproteobacteria(83);Pasteurellales(1),Enterobacteriales(82);Pasteurellaceae(1),Enterobacteriaceae(82);Pasteurella(1),Yersinia(82)	prophage(1),extrachromosomal(82)	linear (83)	VirSorter(83)	85
Cluster_28	82	80	hallmark(78),vdb(3),NCBI_RefSeq(2),refseq(47)	Viruses(82);unclassified phages(2),unclassified(3),dsDNA viruses no RNA stage(77);(1),unknown(1),unclassified(3),Caudovirales(77);(1),unknown(1),Podoviridae(1),Siphoviridae(23),unclassified(27),Myoviridae(29);P22likevirus(1),(4),Lambdalikevirus(10),unclassified(23),unknown(42);unclassified(10),unknown(70)	Bacteria(82);Firmicutes(4),Proteobacteria(78);Alphaproteobacteria(1),Deltaproteobacteria(1),Betaproteobacteria(2),Clostridia(4),Gammaproteobacteria(74);Rhodospirillales(1),Bdellovibrionales(1),Burkholderiales(2),Clostridiales(4),Pseudomonadales(25),Enterobacteriales(49);Acetobacteraceae(1),Bdellovibrionaceae(1),Burkholderiaceae(2),Clostridiaceae(4),Moraxellaceae(25),Enterobacteriaceae(49);Psychro…	prophage(20),complete(2),extrachromosomal(60)	linear (80)	RefSeq(2),VirSorter(80)	102
Cluster_29	80	78	hallmark(78),vdb(1),NCBI_RefSeq(2),refseq(78)	Viruses(80);dsDNA viruses no RNA stage(80);Caudovirales(79);unclassified(1),Siphoviridae(78);Lambdalikevirus(1),unclassified(2),unknown(75);unknown(78)	unknown(1),Bacteria(79);Firmicutes(79);Clostridia(2),Bacilli(77);Clostridiales(2),Bacillales(3),Lactobacillales(74);Leuconostocaceae(1),Clostridiales Family XI. Incertae Sedis(1),Paenibacillaceae(1),Lactobacillaceae(1),Peptostreptococcaceae(1),Listeriaceae(2),Enterococcaceae(72);Lactobacillus(1),Brevibacillus(1),Weissella(1),unknown(2),Listeria(2),Enterococcus(72)	prophage(69),complete(2),extrachromosomal(9)	linear (78)	RefSeq(2),VirSorter(78)	77
Cluster_30	78	76	hallmark(72),vdb(4),NCBI_RefSeq(2),refseq(71)	Viruses(78);unclassified phages(1),dsDNA viruses no RNA stage(77);Caudovirales(77);Podoviridae(1),Siphoviridae(76);Lambdalikevirus(2),unclassified(4),unknown(70);unknown(76)	Bacteria(78);Fusobacteria(1),Firmicutes(77);Fusobacteriia(1),Clostridia(2),Bacilli(75);Fusobacteriales(1),Clostridiales(2),Bacillales(4),Lactobacillales(71);Fusobacteriaceae(1),Bacillaceae(2),Paenibacillaceae(2),Clostridiaceae(2),Enterococcaceae(5),Lactobacillaceae(5),Streptococcaceae(61);Fusobacterium(1),Clostridium(2),Paenibacillus(2),Bacillus(2),Lactococcus(3),Enterococcus(5),Lactobacillus(5),…	prophage(28),complete(2),extrachromosomal(48)	circular (2) linear (74)	RefSeq(2),VirSorter(76)	74
Cluster_31	68	63	hallmark(58),vdb(7),NCBI_RefSeq(5),refseq(62)	Viruses(68);unclassified(1),dsDNA viruses no RNA stage(67);unclassified(1),Caudovirales(67);unclassified(2),Siphoviridae(64);unknown(26),unclassified(37);unclassified(2),unknown(61)	Bacteria(68);Firmicutes(68);unknown(1),Clostridia(3),Bacilli(64);unknown(1),Bacillales(3),Clostridiales(3),Lactobacillales(61);unknown(1),Peptococcaceae(1),Peptostreptococcaceae(1),Listeriaceae(1),Clostridiaceae(1),Bacillaceae(2),Enterococcaceae(3),Streptococcaceae(58);Desulfosporosinus(1),Clostridium(1),Geobacillus(1),Bacillus(1),Bavariicoccus(1),unknown(1),Listeria(1),Peptostreptococcus(1),Lact…	prophage(29),complete(5),extrachromosomal(34)	circular (2) linear (61)	RefSeq(5),VirSorter(63)	66
Cluster_32	65	50	hallmark(48),vdb(1),NCBI_RefSeq(15),refseq(49)	Viruses(65);dsDNA viruses no RNA stage(65);Caudovirales(65);unclassified(1),Siphoviridae(64);Lambdalikevirus(4),Phic3unalikevirus(6),unclassified(11),unknown(29);unknown(50)	Bacteria(65);Firmicutes(65);Clostridia(1),Bacilli(64);Bacillales(1),Clostridiales(1),Lactobacillales(63);Listeriaceae(1),Clostridiaceae(1),Enterococcaceae(4),Leuconostocaceae(10),Streptococcaceae(20),Lactobacillaceae(29);Clostridium(1),Leuconostoc(1),Pediococcus(1),Listeria(1),Enterococcus(4),Oenococcus(9),Streptococcus(10),Lactococcus(10),Lactobacillus(28)	prophage(12),complete(15),extrachromosomal(38)	circular (1) linear (49)	RefSeq(15),VirSorter(50)	119
Cluster_36	64	61	hallmark(59),NCBI_RefSeq(3),noncaudo(36),refseq(25)	Viruses(64);ssDNA viruses(64);(3),unknown(61);Inoviridae(64);Inovirus(64);unknown(61)	Bacteria(64);Proteobacteria(64);Gammaproteobacteria(64);Oceanospirillales(1),Enterobacteriales(63);Halomonadaceae(1),Enterobacteriaceae(63);Yersinia(1),Citrobacter(1),Klebsiella(1),Providencia(1),Halomonas(1),Salmonella(9),Escherichia(50)	prophage(23),complete(3),extrachromosomal(38)	circular (4) linear (57)	RefSeq(3),VirSorter(61)	27
Cluster_33	64	64	hallmark(64),vdb(38),phage(12)	Viruses(64);unclassified(5),dsDNA viruses no RNA stage(59);unclassified(5),Caudovirales(59);unclassified(6),Siphoviridae(58);unclassified(6),Lambdalikevirus(58);unclassified(1),unknown(63)	Bacteria(64);Proteobacteria(64);Gammaproteobacteria(64);Enterobacteriales(64);Enterobacteriaceae(64);Escherichia(64)	prophage(50),extrachromosomal(14)	circular (2) linear (62)	VirSorter(64)	50
Cluster_34	64	63	hallmark(57),vdb(5),NCBI_RefSeq(1),refseq(56)	Viruses(64);dsDNA viruses no RNA stage(64);Caudovirales(64);Siphoviridae(14),Myoviridae(22),unclassified(28);Lambdalikevirus(4),unclassified(27),unknown(32);unclassified(10),unknown(53)	Bacteria(64);Firmicutes(64);Negativicutes(3),Clostridia(61);Selenomonadales(3),Clostridiales(61);Ruminococcaceae(1),Lachnospiraceae(1),unknown(1),Veillonellaceae(3),Clostridiaceae(4),Peptostreptococcaceae(54);Flavonifractor(1),Peptostreptococcus(1),Megasphaera(1),Ruminococcus(1),Selenomonas(2),Clostridium(3),unknown(55)	prophage(6),complete(1),extrachromosomal(57)	circular (3) linear (60)	RefSeq(1),VirSorter(63)	96
Cluster_35	64	63	hallmark(58),NCBI_RefSeq(1),refseq(63)	Viruses(64);dsDNA viruses no RNA stage(64);Caudovirales(64);Siphoviridae(64);Lambdalikevirus(18),unclassified(45);unknown(63)	Bacteria(64);Firmicutes(64);Bacilli(64);Bacillales(64);Staphylococcaceae(64);Staphylococcus(64)	prophage(13),complete(1),extrachromosomal(50)	linear (63)	RefSeq(1),VirSorter(63)	73
Cluster_37	62	62	hallmark(51),phage(62)	Viruses(62);unclassified(4),dsDNA viruses no RNA stage(58);unclassified(4),Caudovirales(58);Siphoviridae(2),unclassified(60);unknown(2),Lambdalikevirus(2),(4),unclassified(54);unknown(6),unclassified(56)	Bacteria(62);Proteobacteria(62);Gammaproteobacteria(62);Enterobacteriales(62);Enterobacteriaceae(62);Salmonella(1),Photorhabdus(1),Shigella(1),Pantoea(1),Escherichia(6),Klebsiella(52)	prophage(52),extrachromosomal(10)	linear (62)	VirSorter(62)	61
Cluster_38	60	60	hallmark(34),vdb(2),phage(57)	Viruses(60);dsDNA viruses no RNA stage(60);Caudovirales(60);Myoviridae(13),Siphoviridae(19),unclassified(28);(1),Lambdalikevirus(3),unclassified(26),unknown(30);unclassified(22),unknown(38)	Bacteria(60);Bacteroidetes(1),Proteobacteria(59);Cytophagia(1),Gammaproteobacteria(59);Cytophagales(1),Pseudomonadales(59);Cytophagaceae(1),Moraxellaceae(59);Microscilla(1),Acinetobacter(59)	prophage(11),extrachromosomal(49)	linear (60)	VirSorter(60)	73
Cluster_39	59	58	hallmark(58),NCBI_RefSeq(1),refseq(58)	Viruses(59);dsDNA viruses no RNA stage(59);Caudovirales(59);Myoviridae(4),unclassified(5),Siphoviridae(50);Mulikevirus(1),unknown(3),unclassified(6),Lambdalikevirus(49);unknown(58)	Bacteria(59);Proteobacteria(59);Deltaproteobacteria(4),Gammaproteobacteria(11),Betaproteobacteria(44);Cardiobacteriales(1),Enterobacteriales(3),Desulfovibrionales(4),Burkholderiales(4),Pasteurellales(7),Neisseriales(40);Alcaligenaceae(1),Cardiobacteriaceae(1),Enterobacteriaceae(3),Burkholderiaceae(3),Desulfovibrionaceae(4),Pasteurellaceae(7),Neisseriaceae(40);Salmonella(1),Actinobacillus(1),Cupri…	prophage(27),complete(1),extrachromosomal(31)	linear (58)	RefSeq(1),VirSorter(58)	65
Cluster_40	57	54	hallmark(54),vdb(1),NCBI_RefSeq(3),refseq(54)	Viruses(57);dsDNA viruses no RNA stage(57);Caudovirales(57);Siphoviridae(57);Spbetalikevirus(1),unclassified(17),unknown(36);unknown(54)	Bacteria(57);Firmicutes(57);Clostridia(2),Bacilli(55);Lactobacillales(1),Clostridiales(2),Bacillales(54);unknown(1),Enterococcaceae(1),Bacillaceae(1),Listeriaceae(1),Clostridiaceae(1),Staphylococcaceae(52);Clostridium(1),Flavonifractor(1),Listeria(1),Enterococcus(1),Bacillus(1),Staphylococcus(52)	prophage(12),complete(3),extrachromosomal(42)	linear (54)	RefSeq(3),VirSorter(54)	71
Cluster_41	55	53	hallmark(53),vdb(1),NCBI_RefSeq(2),refseq(53)	Viruses(55);dsDNA viruses no RNA stage(55);Caudovirales(55);unclassified(3),Siphoviridae(52);Lambdalikevirus(5),unclassified(12),unknown(36);unknown(53)	Bacteria(55);Firmicutes(55);Bacilli(55);Bacillales(1),Lactobacillales(54);Carnobacteriaceae(1),Listeriaceae(1),Streptococcaceae(2),Leuconostocaceae(3),Lactobacillaceae(11),Enterococcaceae(37);Brochothrix(1),Streptococcus(1),Alloiococcus(1),Leuconostoc(1),Lactococcus(1),Fructobacillus(2),Lactobacillus(11),Enterococcus(37)	prophage(28),complete(2),extrachromosomal(25)	linear (53)	RefSeq(2),VirSorter(53)	69
Cluster_43	53	52	hallmark(1),NCBI_RefSeq(1),noncaudo(9),refseq(43)	Viruses(53);ssDNA viruses(53);(1),unknown(52);Inoviridae(53);unknown(3),unclassified(13),Inovirus(36);unknown(52)	Bacteria(53);Proteobacteria(53);Gammaproteobacteria(53);Xanthomonadales(53);Xanthomonadaceae(53);Stenotrophomonas(3),Xanthomonas(50)	prophage(17),complete(1),extrachromosomal(35)	circular (1) linear (51)	RefSeq(1),VirSorter(52)	27
Cluster_42	53	53	hallmark(47),vdb(14),noncaudo(1),phage(21)	Viruses(53);dsDNA viruses no RNA stage(53);Caudovirales(53);unclassified(10),Siphoviridae(43);Phic3unalikevirus(1),unknown(11),unclassified(20),Lambdalikevirus(21);unclassified(7),unknown(46)	Bacteria(53);Spirochaetes(1),Actinobacteria(2),Proteobacteria(8),Firmicutes(42);Spirochaetia(1),Actinobacteria(2),Gammaproteobacteria(2),unknown(3),Alphaproteobacteria(6),Bacilli(7),Clostridia(16),Negativicutes(16);Spirochaetales(1),Sphingomonadales(1),Rickettsiales(1),Rhodobacterales(1),Actinomycetales(2),Aeromonadales(2),Lactobacillales(2),Rhizobiales(3),unknown(3),Bacillales(5),Clostridiales(1…	prophage(6),extrachromosomal(47)	circular (1) linear (52)	VirSorter(53)	124
Cluster_44	52	52	hallmark(52),vdb(11),phage(52)	Viruses(52);dsDNA viruses no RNA stage(52);Caudovirales(52);unclassified(6),Myoviridae(23),Siphoviridae(23);unclassified(8),Hpunalikevirus(10),Mulikevirus(11),Lambdalikevirus(23);unknown(52)	Bacteria(52);Proteobacteria(52);Deltaproteobacteria(1),Gammaproteobacteria(8),Betaproteobacteria(43);Enterobacteriales(1),Syntrophobacterales(1),Pasteurellales(7),Neisseriales(43);Enterobacteriaceae(1),Syntrophaceae(1),Pasteurellaceae(7),Neisseriaceae(43);Pasteurella(1),Pseudogulbenkiania(1),Enterobacter(1),Mannheimia(1),Smithella(1),Kingella(2),Avibacterium(2),Haemophilus(3),Neisseria(40)	prophage(23),extrachromosomal(29)	linear (52)	VirSorter(52)	56
Cluster_45	49	0	NCBI_RefSeq(49)	Viruses(49);dsDNA viruses no RNA stage(49);Caudovirales(48);Myoviridae(48);Schizot4likevirus(2),T4likevirus(41)	Bacteria(49);Bacteroidetes(1),Proteobacteria(48);Epsilonproteobacteria(1),Alphaproteobacteria(1),unknown(1),Gammaproteobacteria(46);Bacteroidetes Order II. Incertae sedis(1),Campylobacterales(1),Sphingomonadales(1),Vibrionales(3),Pseudomonadales(5),Aeromonadales(10),Enterobacteriales(28);Rhodothermaceae(1),Sphingomonadaceae(1),unknown(1),Campylobacteraceae(1),Vibrionaceae(3),Moraxellaceae(5),Aero…	complete(49)	-	RefSeq(49)
Cluster_46	47	47	hallmark(47),phage(46)	Viruses(47);dsDNA viruses no RNA stage(47);Caudovirales(47);Siphoviridae(47);Tunalikevirus(1),Lambdalikevirus(2),unknown(3),unclassified(41);unknown(47)	Bacteria(47);Proteobacteria(47);Gammaproteobacteria(47);Pseudomonadales(47);Moraxellaceae(47);Acinetobacter(47)	prophage(2),extrachromosomal(45)	circular (1) linear (46)	VirSorter(47)	70
Cluster_48	44	44	hallmark(42),vdb(1),phage(25)	Viruses(44);unclassified(6),dsDNA viruses no RNA stage(38);unclassified(6),Caudovirales(38);Myoviridae(1),Podoviridae(1),unclassified(13),Siphoviridae(29);P22likevirus(1),unknown(5),unclassified(17),Lambdalikevirus(21);unclassified(1),unknown(43)	Bacteria(44);Fusobacteria(6),Firmicutes(13),Proteobacteria(25);unknown(2),Bacilli(3),Clostridia(4),Negativicutes(4),Fusobacteriia(6),Gammaproteobacteria(25);unknown(2),Bacillales(3),Selenomonadales(4),Clostridiales(4),Fusobacteriales(6),Enterobacteriales(25);Ruminococcaceae(1),unknown(2),Leptotrichiaceae(2),Clostridiaceae(3),Paenibacillaceae(3),Veillonellaceae(4),Fusobacteriaceae(4),Enterobacteri…	prophage(7),extrachromosomal(37)	circular (10) linear (34)	VirSorter(44)	89
Cluster_47	44	42	hallmark(21),vdb(6),NCBI_RefSeq(2),refseq(39)	Viruses(44);unclassified(3),dsDNA viruses no RNA stage(41);unclassified(3),Caudovirales(41);unclassified(6),Siphoviridae(38);Tunalikevirus(1),(2),unclassified(13),Lambdalikevirus(27);unclassified(12),unknown(30)	Bacteria(44);Proteobacteria(44);Gammaproteobacteria(44);Xanthomonadales(1),Pseudomonadales(5),Enterobacteriales(38);Moraxellaceae(1),Xanthomonadaceae(1),Pseudomonadaceae(4),Enterobacteriaceae(38);Stenotrophomonas(1),unknown(1),Citrobacter(1),Acinetobacter(1),Photorhabdus(2),Serratia(3),Shigella(4),Pseudomonas(4),Klebsiella(7),Salmonella(9),Escherichia(11)	prophage(11),complete(2),extrachromosomal(31)	linear (42)	RefSeq(2),VirSorter(42)	79
Cluster_51	43	43	vdb(2),noncaudo(43)	Viruses(43);dsDNA viruses no RNA stage(2),ssDNA viruses(41);Caudovirales(2),unknown(41);unclassified(2),Inoviridae(41);(1),unclassified(1),Inovirus(41);unclassified(2),unknown(41)	Bacteria(43);Proteobacteria(43);Betaproteobacteria(6),Gammaproteobacteria(37);Hydrogenophilales(1),Pasteurellales(3),Burkholderiales(5),Enterobacteriales(34);Alcaligenaceae(1),Hydrogenophilaceae(1),Oxalobacteraceae(1),Pasteurellaceae(3),Burkholderiaceae(3),Enterobacteriaceae(34);Pandoraea(1),Actinobacillus(1),Thiobacillus(1),Herbaspirillum(1),Pectobacterium(1),Alcaligenes(1),Citrobacter(1),Burkho…	prophage(19),extrachromosomal(24)	circular (12) linear (31)	VirSorter(43)	19
Cluster_50	43	42	hallmark(37),vdb(3),NCBI_RefSeq(1),refseq(39)	Viruses(43);unclassified(1),dsDNA viruses no RNA stage(42);unclassified(1),Caudovirales(42);unclassified(2),Siphoviridae(41);unclassified(20),unknown(22);unclassified(9),unknown(33)	Bacteria(43);Firmicutes(43);Negativicutes(1),Erysipelotrichia(1),Clostridia(4),Bacilli(37);Selenomonadales(1),Bacillales(1),Erysipelotrichales(1),Clostridiales(4),Lactobacillales(36);Ruminococcaceae(1),Veillonellaceae(1),Erysipelotrichaceae(1),Lactobacillaceae(1),Enterococcaceae(1),Paenibacillaceae(1),Clostridiaceae(3),Streptococcaceae(34);Paenibacillus(1),Enterococcus(1),Coprobacillus(1),Ruminoc…	prophage(16),complete(1),extrachromosomal(26)	linear (42)	RefSeq(1),VirSorter(42)	68
Cluster_49	43	42	hallmark(41),NCBI_RefSeq(1),refseq(42)	Viruses(43);dsDNA viruses no RNA stage(43);Caudovirales(43);Siphoviridae(43);unknown(1),Lambdalikevirus(14),unclassified(28);unknown(42)	Bacteria(43);Firmicutes(43);Bacilli(43);Bacillales(43);Bacillaceae(2),Staphylococcaceae(41);Salinicoccus(1),Bacillus(2),Staphylococcus(40)	prophage(17),complete(1),extrachromosomal(25)	linear (42)	RefSeq(1),VirSorter(42)	73
Cluster_53	42	42	hallmark(37),vdb(1),phage(36)	Viruses(42);dsDNA viruses no RNA stage(42);Caudovirales(42);Myoviridae(7),unclassified(8),Siphoviridae(27);Twortlikevirus(2),T4likevirus(5),unclassified(11),Lambdalikevirus(24);unclassified(6),unknown(36)	Bacteria(42);Proteobacteria(42);Gammaproteobacteria(42);Pseudomonadales(42);Moraxellaceae(42);Acinetobacter(42)	extrachromosomal(42)	circular (10) linear (32)	VirSorter(42)	123
Cluster_52	42	35	hallmark(34),vdb(3),NCBI_RefSeq(7),refseq(34)	Viruses(42);unclassified phages(1),dsDNA viruses no RNA stage(41);Caudovirales(41);Siphoviridae(41);C2likevirus(6),unclassified(8),unknown(21);unknown(35)	Bacteria(42);Firmicutes(42);Clostridia(1),Bacilli(41);Clostridiales(1),Lactobacillales(41);Peptostreptococcaceae(1),Enterococcaceae(3),Lactobacillaceae(12),Streptococcaceae(26);unknown(2),Enterococcus(3),Lactobacillus(11),Streptococcus(26)	prophage(13),complete(7),extrachromosomal(22)	linear (35)	RefSeq(7),VirSorter(35)	79
Cluster_54	41	39	hallmark(35),NCBI_RefSeq(2),refseq(39)	Viruses(41);unclassified(2),unclassified phages(5),dsDNA viruses no RNA stage(34);unknown(1),(2),unclassified(3),Caudovirales(34);unknown(1),Siphoviridae(1),(2),unclassified(16),Myoviridae(20);(1),Lambdalikevirus(1),unclassified(16),unknown(21);unclassified(4),unknown(35)	Bacteria(41);Proteobacteria(41);Betaproteobacteria(3),Alphaproteobacteria(5),Gammaproteobacteria(33);Burkholderiales(1),Aeromonadales(1),Rhizobiales(1),unknown(1),Neisseriales(2),Pseudomonadales(2),Rhodospirillales(4),Enterobacteriales(29);Moraxellaceae(1),Aeromonadaceae(1),Oxalobacteraceae(1),Pseudomonadaceae(1),unknown(1),Bradyrhizobiaceae(1),Neisseriaceae(2),Acetobacteraceae(4),Enterobacteriac…	prophage(6),complete(2),extrachromosomal(33)	linear (39)	RefSeq(2),VirSorter(39)	91
Cluster_56	39	31	hallmark(31),NCBI_RefSeq(8),refseq(31)	Viruses(39);unclassified phages(1),dsDNA viruses no RNA stage(38);Caudovirales(37);Siphoviridae(37);unclassified(6),Lambdalikevirus(6),unknown(19);unknown(31)	Bacteria(39);Firmicutes(39);Bacilli(39);Lactobacillales(2),Bacillales(37);Enterococcaceae(2),Staphylococcaceae(37);Enterococcus(2),Staphylococcus(37)	prophage(10),complete(8),extrachromosomal(21)	linear (31)	RefSeq(8),VirSorter(31)	120
Cluster_55	39	31	hallmark(29),vdb(3),NCBI_RefSeq(8),refseq(30)	Viruses(39);dsDNA viruses no RNA stage(39);Caudovirales(38);Myoviridae(1),Siphoviridae(37);Phic3unalikevirus(1),unclassified(9),Lambdalikevirus(10),unknown(12);unclassified(2),unknown(29)	Bacteria(39);Firmicutes(39);Negativicutes(1),Clostridia(4),Bacilli(34);Selenomonadales(1),Lactobacillales(1),Clostridiales(4),Bacillales(33);Carnobacteriaceae(1),Veillonellaceae(1),Peptostreptococcaceae(1),Paenibacillaceae(3),Clostridiaceae(3),Bacillaceae(30);unknown(1),Paenibacillus(1),Aneurinibacillus(1),Carnobacterium(1),Brevibacillus(1),Megasphaera(1),Clostridium(3),Bacillus(30)	prophage(12),complete(8),extrachromosomal(19)	linear (31)	RefSeq(8),VirSorter(31)	87
Cluster_58	38	5	hallmark(4),vdb(1),NCBI_RefSeq(33),refseq(4)	Viruses(38);dsDNA viruses no RNA stage(38);Caudovirales(38);unclassified(2),Podoviridae(36);unclassified(2),T7likevirus(31);unclassified(1),unknown(4)	Bacteria(38);Cyanobacteria(1),Verrucomicrobia(1),Firmicutes(1),Proteobacteria(35);Negativicutes(1),unknown(2),Alphaproteobacteria(5),Gammaproteobacteria(30);Selenomonadales(1),Xanthomonadales(1),Sphingomonadales(1),Chroococcales(1),Rhodobacterales(1),Vibrionales(3),unknown(4),Pseudomonadales(6),Enterobacteriales(20);Veillonellaceae(1),Sphingomonadaceae(1),Rhodobacteraceae(1),Xanthomonadaceae(1),V…	prophage(1),complete(33),extrachromosomal(4)	linear (5)	RefSeq(33),VirSorter(5)	53
Cluster_57	38	34	hallmark(34),vdb(3),NCBI_RefSeq(4),refseq(34)	Viruses(38);unclassified phages(1),unclassified(14),dsDNA viruses no RNA stage(23);unclassified(14),Caudovirales(23);unclassified(15),Siphoviridae(22);unclassified(2),unknown(32);unknown(34)	Bacteria(38);Actinobacteria(3),Firmicutes(35);Negativicutes(1),Erysipelotrichia(1),Actinobacteria(3),Clostridia(5),Bacilli(28);Selenomonadales(1),Bacillales(1),Erysipelotrichales(1),Coriobacteriales(1),Actinomycetales(2),Clostridiales(5),Lactobacillales(27);Micrococcaceae(1),Ruminococcaceae(1),Clostridiales Family XI. Incertae Sedis(1),Veillonellaceae(1),Erysipelotrichaceae(1),Lactobacillaceae(1)…	prophage(21),complete(4),extrachromosomal(13)	circular (1) linear (33)	RefSeq(4),VirSorter(34)	70
Cluster_59	37	26	hallmark(25),NCBI_RefSeq(11),refseq(26)	Viruses(37);dsDNA viruses no RNA stage(37);Caudovirales(37);Siphoviridae(37);Lambdalikevirus(30);unknown(26)	Bacteria(37);Proteobacteria(37);Alphaproteobacteria(1),Gammaproteobacteria(36);Rhodobacterales(1),Pseudomonadales(36);Rhodobacteraceae(1),Pseudomonadaceae(36);Rhodobacter(1),Pseudomonas(36)	prophage(20),complete(11),extrachromosomal(6)	linear (26)	RefSeq(11),VirSorter(26)	58
Cluster_60	35	0	NCBI_RefSeq(35)	Viruses(35);dsDNA viruses no RNA stage(35);Caudovirales(34);Siphoviridae(1),Myoviridae(31);T4likevirus(7)	Bacteria(35);Proteobacteria(1),Cyanobacteria(34);Alphaproteobacteria(1),unknown(34);unknown(1),Prochlorales(10),Chroococcales(24);Prochlorococcaceae(10),unknown(25);Candidatus Pelagibacter(1),unknown(3),Prochlorococcus(7),Synechococcus(24)	complete(35)	-	RefSeq(35)
Cluster_61	35	35	hallmark(35),vdb(1)	Viruses(35);unclassified(1),dsDNA viruses no RNA stage(34);unclassified(1),Caudovirales(34);Myoviridae(1),Podoviridae(6),unclassified(28);unknown(6),unclassified(29);unknown(35)	Bacteria(35);Spirochaetes(35);Spirochaetia(35);Spirochaetales(35);Leptospiraceae(35);Leptospira(35)	prophage(2),extrachromosomal(33)	circular (1) linear (34)	VirSorter(35)	100
Cluster_62	33	33	hallmark(28),vdb(12),phage(33)	Viruses(33);dsDNA viruses no RNA stage(33);Caudovirales(33);Siphoviridae(33);C2likevirus(8),unknown(10),unclassified(15);unknown(33)	Bacteria(33);Firmicutes(33);Bacilli(33);Lactobacillales(33);Streptococcaceae(33);Streptococcus(33)	prophage(14),extrachromosomal(19)	linear (33)	VirSorter(33)	80
Cluster_63	33	32	hallmark(32),NCBI_RefSeq(1),refseq(32)	Viruses(33);dsDNA viruses no RNA stage(33);Caudovirales(33);Myoviridae(1),Podoviridae(2),unclassified(30);unknown(1),unclassified(31);unclassified(1),unknown(31)	Bacteria(33);Proteobacteria(33);Gammaproteobacteria(33);Enterobacteriales(33);Enterobacteriaceae(33);Pectobacterium(1),Enterobacter(2),Klebsiella(30)	prophage(3),complete(1),extrachromosomal(29)	linear (32)	RefSeq(1),VirSorter(32)	56
Cluster_64	32	29	hallmark(25),vdb(8),NCBI_RefSeq(3),refseq(29)	Viruses(32);dsDNA viruses no RNA stage(32);Caudovirales(32);unclassified(1),Siphoviridae(31);unclassified(5),Lambdalikevirus(11),unknown(13);unclassified(2),unknown(27)	Bacteria(32);Proteobacteria(32);Gammaproteobacteria(32);Xanthomonadales(2),Enterobacteriales(2),Pseudomonadales(28);Enterobacteriaceae(2),Xanthomonadaceae(2),Pseudomonadaceae(28);Serratia(1),Klebsiella(1),Stenotrophomonas(2),Pseudomonas(28)	prophage(14),complete(3),extrachromosomal(15)	linear (29)	RefSeq(3),VirSorter(29)	100
Cluster_66	32	32	hallmark(31),phage(4)	Viruses(32);dsDNA viruses no RNA stage(32);Caudovirales(32);Podoviridae(2),Myoviridae(10),unclassified(20);Punalikevirus(9),(10),unclassified(13);unclassified(16),unknown(16)	Bacteria(32);Proteobacteria(32);Betaproteobacteria(2),Gammaproteobacteria(30);Burkholderiales(1),Neisseriales(1),Pseudomonadales(30);Burkholderiaceae(1),Neisseriaceae(1),Moraxellaceae(30);Burkholderia(1),Vitreoscilla(1),Acinetobacter(30)	prophage(5),extrachromosomal(27)	circular (5) linear (27)	VirSorter(32)	122
Cluster_65	32	32	hallmark(28),vdb(5),phage(32)	Viruses(32);unclassified(3),dsDNA viruses no RNA stage(29);unclassified(3),Caudovirales(29);unclassified(3),Siphoviridae(29);C2likevirus(4),unknown(9),unclassified(19);unclassified(1),unknown(31)	Bacteria(32);Firmicutes(32);Bacilli(32);Lactobacillales(32);Streptococcaceae(32);Streptococcus(32)	prophage(20),extrachromosomal(12)	linear (32)	VirSorter(32)	86
Cluster_67	31	29	hallmark(29),NCBI_RefSeq(2),refseq(29)	Viruses(31);dsDNA viruses no RNA stage(31);Caudovirales(31);unclassified(3),Myoviridae(28);unknown(7),unclassified(22);unknown(29)	Bacteria(31);Firmicutes(31);Bacilli(2),Clostridia(29);Bacillales(2),Clostridiales(29);Paenibacillaceae(1),Bacillaceae(1),Clostridiaceae(2),Peptostreptococcaceae(27);Paenibacillus(1),Bacillus(1),unknown(29)	prophage(6),complete(2),extrachromosomal(23)	circular (1) linear (28)	RefSeq(2),VirSorter(29)	95
Cluster_69	31	28	hallmark(27),vdb(1),NCBI_RefSeq(3),refseq(27)	Viruses(31);dsDNA viruses no RNA stage(31);Caudovirales(31);Podoviridae(31);unknown(28);unknown(28)	Bacteria(31);Proteobacteria(31);Epsilonproteobacteria(31);Campylobacterales(31);Campylobacteraceae(1),Helicobacteraceae(30);Campylobacter(1),Helicobacter(30)	prophage(21),complete(3),extrachromosomal(7)	linear (28)	RefSeq(3),VirSorter(28)	34
Cluster_68	31	30	hallmark(27),NCBI_RefSeq(1),refseq(30)	Viruses(31);unclassified(1),unclassified phages(2),dsDNA viruses no RNA stage(28);(1),unclassified(1),Caudovirales(28);(1),unclassified(1),Siphoviridae(28);unclassified(7),unknown(23);unknown(30)	Bacteria(31);Firmicutes(31);Bacilli(31);Lactobacillales(31);Lactobacillaceae(1),Streptococcaceae(30);Lactobacillus(1),Streptococcus(30)	prophage(9),complete(1),extrachromosomal(21)	linear (30)	RefSeq(1),VirSorter(30)	65
Cluster_72	28	28	hallmark(27),vdb(13),phage(24)	Viruses(28);dsDNA viruses no RNA stage(28);Caudovirales(28);unclassified(3),Siphoviridae(25);unknown(1),unclassified(3),Lambdalikevirus(24);unknown(28)	Bacteria(28);Firmicutes(2),Proteobacteria(26);Clostridia(1),Bacilli(1),Gammaproteobacteria(26);Bacillales(1),Clostridiales(1),Pseudomonadales(3),Pasteurellales(5),Enterobacteriales(18);Paenibacillaceae(1),Clostridiaceae(1),Pseudomonadaceae(3),Pasteurellaceae(5),Enterobacteriaceae(18);Salmonella(1),Clostridium(1),Pasteurella(1),Erwinia(1),Klebsiella(1),Dickeya(1),Brevibacillus(1),Haemophilus(1),Ma…	prophage(19),extrachromosomal(9)	linear (28)	VirSorter(28)	62
Cluster_71	28	28	hallmark(14),phage(28)	Viruses(28);dsDNA viruses no RNA stage(28);Caudovirales(28);Myoviridae(28);unknown(1),unclassified(5),Hpunalikevirus(22);unknown(28)	Bacteria(28);Proteobacteria(28);Deltaproteobacteria(2),Gammaproteobacteria(26);Enterobacteriales(1),Desulfovibrionales(2),Pseudomonadales(25);Enterobacteriaceae(1),Desulfovibrionaceae(2),Pseudomonadaceae(25);Escherichia(1),Desulfovibrio(2),Pseudomonas(25)	prophage(6),extrachromosomal(22)	circular (1) linear (27)	VirSorter(28)	45
Cluster_70	28	26	hallmark(26),vdb(1),NCBI_RefSeq(2),refseq(26)	Viruses(28);unclassified phages(1),unclassified(13),dsDNA viruses no RNA stage(14);unclassified(13),Caudovirales(14);unclassified(13),Siphoviridae(14);unclassified(1),unknown(25);unknown(26)	Bacteria(28);Firmicutes(28);Bacilli(28);Lactobacillales(28);Lactobacillaceae(1),Streptococcaceae(27);Lactobacillus(1),Lactococcus(1),Streptococcus(26)	prophage(18),complete(2),extrachromosomal(8)	linear (26)	RefSeq(2),VirSorter(26)	52
Cluster_73	28	2	hallmark(2),NCBI_RefSeq(26),refseq(2)	Viruses(28);dsDNA viruses no RNA stage(28);Caudovirales(28);Siphoviridae(28);L5likevirus(1),unclassified(2);unknown(1),unclassified(1)	Bacteria(28);Actinobacteria(28);Actinobacteria(28);Actinobacteridae(2),Actinomycetales(26);Nocardiaceae(1),Streptomycetaceae(1),Actinomycetales(2),Mycobacteriaceae(24);Rhodococcus(1),Streptomyces(1),Corynebacterineae(2),Mycobacterium(24)	prophage(1),complete(26),extrachromosomal(1)	linear (2)	RefSeq(26),VirSorter(2)	77
Cluster_74	27	27	hallmark(22),vdb(1),phage(27)	Viruses(27);dsDNA viruses no RNA stage(27);Caudovirales(27);Siphoviridae(2),unclassified(12),Myoviridae(13);unclassified(11),unknown(16);unknown(27)	Bacteria(27);Firmicutes(27);Clostridia(27);Clostridiales(27);Peptostreptococcaceae(27);unknown(27)	prophage(12),extrachromosomal(15)	linear (27)	VirSorter(27)	61
Cluster_75	27	27	hallmark(27),vdb(11)	Viruses(27);dsDNA viruses no RNA stage(27);Caudovirales(27);Siphoviridae(27);Lambdalikevirus(27);unknown(27)	Bacteria(27);Proteobacteria(27);Betaproteobacteria(27);Neisseriales(27);Neisseriaceae(27);Neisseria(27)	prophage(9),extrachromosomal(18)	linear (27)	VirSorter(27)	68
Cluster_76	27	27	hallmark(26),vdb(5),phage(23)	Viruses(27);dsDNA viruses no RNA stage(27);Caudovirales(27);Siphoviridae(27);Spbetalikevirus(1),Lambdalikevirus(2),unclassified(8),unknown(16);unknown(27)	Bacteria(27);Actinobacteria(1),Firmicutes(26);Actinobacteria(1),Clostridia(4),Bacilli(22);Coriobacteriales(1),Clostridiales(4),Bacillales(22);Coriobacteriaceae(1),Clostridiales Family XI. Incertae Sedis(1),Oscillospiraceae(1),Clostridiaceae(2),Bacillaceae(22);Atopobium(1),unknown(1),Oscillibacter(1),Gracilibacillus(1),Clostridium(2),Bacillus(21)	prophage(9),extrachromosomal(18)	linear (27)	VirSorter(27)	80
Cluster_77	26	25	hallmark(23),vdb(2),NCBI_RefSeq(1),refseq(24)	Viruses(26);dsDNA viruses no RNA stage(26);Caudovirales(26);unclassified(3),Siphoviridae(23);Lambdalikevirus(1),unclassified(6),Phic3unalikevirus(8),unknown(10);unknown(25)	Bacteria(26);Spirochaetes(1),Firmicutes(25);Spirochaetia(1),Clostridia(25);Spirochaetales(1),Clostridiales(25);Spirochaetaceae(1),Clostridiales Family XI. Incertae Sedis(1),Lachnospiraceae(2),Ruminococcaceae(2),Clostridiaceae(7),Peptostreptococcaceae(13);Treponema(1),Faecalibacterium(1),Helcococcus(1),Ruminococcus(1),Clostridium(6),unknown(16)	prophage(1),complete(1),extrachromosomal(24)	circular (3) linear (22)	RefSeq(1),VirSorter(25)	88
Cluster_78	26	3	hallmark(2),NCBI_RefSeq(23),refseq(3)	Viruses(26);dsDNA viruses no RNA stage(26);Caudovirales(26);Siphoviridae(25);unknown(3);unknown(3)	Bacteria(26);Actinobacteria(26);Actinobacteria(26);Actinomycetales(26);Mycobacteriaceae(26);unknown(5),Mycobacterium(21)	complete(23),extrachromosomal(3)	circular (1) linear (2)	RefSeq(23),VirSorter(3)	69
Cluster_79	25	25	hallmark(15),phage(25)	Viruses(25);dsDNA viruses no RNA stage(25);Caudovirales(25);Siphoviridae(1),Myoviridae(5),Podoviridae(7),unclassified(12);Lambdalikevirus(1),Mulikevirus(2),Punalikevirus(2),(9),unclassified(11);unclassified(5),unknown(20)	Bacteria(25);Proteobacteria(25);Gammaproteobacteria(25);Enterobacteriales(25);Enterobacteriaceae(25);Shigella(2),Salmonella(3),Escherichia(20)	prophage(2),extrachromosomal(23)	circular (2) linear (23)	VirSorter(25)	120
Cluster_80	25	25	hallmark(25),vdb(2)	Viruses(25);dsDNA viruses no RNA stage(25);Caudovirales(25);Siphoviridae(25);Lambdalikevirus(25);unknown(25)	Bacteria(25);Proteobacteria(25);Epsilonproteobacteria(25);Campylobacterales(25);Campylobacteraceae(25);Campylobacter(25)	prophage(4),extrachromosomal(21)	linear (25)	VirSorter(25)	65
Cluster_81	24	24	hallmark(21),phage(23)	Viruses(24);dsDNA viruses no RNA stage(24);Caudovirales(24);Siphoviridae(3),unclassified(21);unknown(1),Lambdalikevirus(3),unclassified(20);unclassified(2),unknown(22)	Bacteria(24);Proteobacteria(24);Gammaproteobacteria(24);Alteromonadales(1),Enterobacteriales(23);Idiomarinaceae(1),Enterobacteriaceae(23);Idiomarina(1),Escherichia(23)	prophage(21),extrachromosomal(3)	linear (24)	VirSorter(24)	69
Cluster_82	24	24	hallmark(14),phage(22)	Viruses(24);unclassified(1),unclassified phages(8),dsDNA viruses no RNA stage(15);unclassified(1),(8),Caudovirales(15);unclassified(5),(8),Siphoviridae(11);(2),unclassified(6),unknown(6),Lambdalikevirus(10);unclassified(4),unknown(20)	Bacteria(24);Proteobacteria(24);Alphaproteobacteria(1),Gammaproteobacteria(23);Rhodospirillales(1),Enterobacteriales(23);Acetobacteraceae(1),Enterobacteriaceae(23);Escherichia(1),Klebsiella(1),Enterobacter(1),Commensalibacter(1),Salmonella(20)	prophage(5),extrachromosomal(19)	linear (24)	VirSorter(24)	61
Cluster_85	23	21	hallmark(21),vdb(6),NCBI_RefSeq(2),refseq(20)	Viruses(23);dsDNA viruses no RNA stage(23);Caudovirales(23);unclassified(2),Siphoviridae(2),Myoviridae(19);Lambdalikevirus(1),unknown(7),unclassified(13);unclassified(1),unknown(20)	Bacteria(23);Proteobacteria(23);Gammaproteobacteria(23);Alteromonadales(1),Oceanospirillales(1),Vibrionales(2),Pseudomonadales(19);Pseudoalteromonadaceae(1),Halomonadaceae(1),Vibrionaceae(2),Pseudomonadaceae(19);Halomonas(1),Algicola(1),Vibrio(2),Pseudomonas(19)	prophage(19),complete(2),extrachromosomal(2)	linear (21)	RefSeq(2),VirSorter(21)	100
Cluster_86	23	0	NCBI_RefSeq(23)	Viruses(23);dsDNA viruses no RNA stage(23);Caudovirales(23);Siphoviridae(23)	Bacteria(23);Actinobacteria(23);Actinobacteria(23);Actinomycetales(23);Propionibacteriaceae(23);Propionibacterium(23)	complete(23)	-	RefSeq(23)
Cluster_84	23	23	hallmark(17),vdb(3),phage(22)	Viruses(23);unclassified(4),dsDNA viruses no RNA stage(19);unclassified(4),Caudovirales(19);Myoviridae(2),Siphoviridae(10),unclassified(11);Lambdalikevirus(4),unclassified(9),unknown(10);unknown(23)	Bacteria(23);Firmicutes(23);Clostridia(23);Clostridiales(23);Peptostreptococcaceae(23);unknown(23)	prophage(11),extrachromosomal(12)	linear (23)	VirSorter(23)	61
Cluster_83	23	23	hallmark(20),vdb(1),phage(22)	Viruses(23);dsDNA viruses no RNA stage(23);Caudovirales(23);unclassified(2),Siphoviridae(21);unclassified(1),unknown(2),Lambdalikevirus(20);unknown(23)	Bacteria(23);Proteobacteria(23);Gammaproteobacteria(23);Pseudomonadales(23);Pseudomonadaceae(23);Pseudomonas(23)	prophage(10),extrachromosomal(13)	linear (23)	VirSorter(23)	68
Cluster_87	23	22	NCBI_RefSeq(1),noncaudo(19),refseq(3)	Viruses(23);unclassified(2),ssDNA viruses(21);unclassified(2),unknown(20);unclassified(2),unknown(20);unknown(4),(9),unclassified(9);unknown(22)	Archaea(23);Euryarchaeota(23);Halobacteria(23);Halobacteriales(23);Halobacteriaceae(23);Halorubrum(1),Natronorubrum(2),Halobiforma(2),Halopiger(2),Halovivax(2),Natrinema(3),Haloterrigena(3),Natrialba(8)	prophage(20),complete(1),extrachromosomal(2)	linear (22)	RefSeq(1),VirSorter(22)	30
Cluster_89	22	19	hallmark(5),vdb(2),NCBI_RefSeq(3),refseq(17)	Viruses(22);unclassified archaeal viruses(1),dsDNA viruses no RNA stage(21);Caudovirales(21);unclassified(3),Siphoviridae(4),Myoviridae(14);Twortlikevirus(1),Spbetalikevirus(1),unknown(8),unclassified(9);unclassified(2),unknown(17)	Archaea(1),unknown(4),Bacteria(17);Cyanobacteria(3),unknown(4),Firmicutes(14);Bacilli(1),unknown(8),Clostridia(12);Oscillatoriales(1),Lactobacillales(1),Pleurocapsales(1),Chroococcales(1),unknown(5),Clostridiales(12);Ruminococcaceae(1),Lactobacillaceae(1),unknown(9),Clostridiaceae(10);Lactobacillus(1),Leptolyngbya(1),Flavonifractor(1),Microcystis(1),Xenococcus(1),Ruminococcus(1),unknown(5),Clostr…	complete(3),extrachromosomal(19)	circular (1) linear (18)	RefSeq(3),VirSorter(19)	120
Cluster_88	22	22	hallmark(21),vdb(4),phage(22)	Viruses(22);dsDNA viruses no RNA stage(22);Caudovirales(22);Podoviridae(1),Siphoviridae(21);unclassified(1),unknown(21);unknown(22)	Bacteria(22);Firmicutes(22);Negativicutes(2),Bacilli(20);Selenomonadales(2),Lactobacillales(20);Enterococcaceae(1),Veillonellaceae(2),Lactobacillaceae(2),Streptococcaceae(17);Veillonella(1),Enterococcus(1),Megasphaera(1),Lactobacillus(2),Streptococcus(17)	prophage(16),extrachromosomal(6)	linear (22)	VirSorter(22)	59
Cluster_91	21	1	hallmark(1),vdb(1),NCBI_RefSeq(20)	Viruses(21);dsDNA viruses no RNA stage(21);Caudovirales(21);Siphoviridae(1),Myoviridae(19);Yualikevirus(1),Spounalikevirus(2),Twortlikevirus(10);unknown(1)	Bacteria(21);Proteobacteria(1),Firmicutes(20);Gammaproteobacteria(1),Bacilli(20);Xanthomonadales(1),Lactobacillales(3),Bacillales(17);Enterococcaceae(1),Xanthomonadaceae(1),Bacillaceae(2),Lactobacillaceae(2),Listeriaceae(4),Staphylococcaceae(11);Xanthomonas(1),Brochothrix(1),unknown(1),Enterococcus(1),Lactobacillus(2),Bacillus(2),Listeria(3),Staphylococcus(10)	prophppppge(1),complete(20)	linear (1)	RefSeq(20),VirSorter(1)	5
Cluster_90	21	20	hallmark(19),vdb(2),NCBI_RefSeq(1),refseq(19)	Viruses(21);unclassified phages(1),unclassified(3),dsDNA viruses no RNA stage(17);(1),unclassified(3),Caudovirales(17);(1),unclassified(3),Siphoviridae(17);unknown(20);unknown(20)	Bacteria(21);Firmicutes(21);Bacilli(21);Bacillales(1),Lactobacillales(20);Bacillaceae(1),Streptococcaceae(10),Enterococcaceae(10);Bacillus(1),Lactococcus(1),Streptococcus(9),Enterococcus(10)	prophage(5),complete(1),extrachromosomal(15)	linear (20)	RefSeq(1),VirSorter(20)	52
Cluster_92	21	21	hallmark(21),phage(21)	Viruses(21);dsDNA viruses no RNA stage(21);Caudovirales(21);Podoviridae(21);unknown(21);unknown(21)	Bacteria(21);Proteobacteria(21);Gammaproteobacteria(21);Enterobacteriales(21);Enterobacteriaceae(21);Klebsiella(21)	extrachromosomal(21)	linear (21)	VirSorter(21)	24
Cluster_94	20	19	hallmark(17),vdb(5),NCBI_RefSeq(1),refseq(19)	Viruses(20);dsDNA viruses no RNA stage(20);Caudovirales(20);unclassified(2),Siphoviridae(18);(1),Lambdalikevirus(1),unclassified(2),unknown(15);unclassified(1),unknown(18)	Bacteria(20);Actinobacteria(1),Firmicutes(19);Actinobacteria(1),Bacilli(19);Coriobacteriales(1),Bacillales(19);Coriobacteriaceae(1),Listeriaceae(19);Cryptobacterium(1),Listeria(19)	prophage(12),complete(1),extrachromosomal(7)	linear (19)	RefSeq(1),VirSorter(19)	69
Cluster_95	20	20	hallmark(20),phage(18)	Viruses(20);dsDNA viruses no RNA stage(20);Caudovirales(20);Siphoviridae(2),unclassified(6),Myoviridae(12);unclassified(7),unknown(13);unclassified(1),unknown(19)	Bacteria(20);Proteobacteria(1),Firmicutes(19);Bacilli(1),Gammaproteobacteria(1),Clostridia(18);Vibrionales(1),Lactobacillales(1),Clostridiales(18);Vibrionaceae(1),Lactobacillaceae(1),Clostridiaceae(5),Peptostreptococcaceae(13);Lactobacillus(1),Vibrio(1),Clostridium(5),unknown(13)	prophage(3),extrachromosomal(17)	circular (1) linear (19)	VirSorter(20)	86
Cluster_93	20	20	hallmark(19),phage(19)	Viruses(20);dsDNA viruses no RNA stage(20);Caudovirales(20);unclassified(1),Siphoviridae(19);unclassified(1),unknown(4),Lambdalikevirus(15);unclassified(1),unknown(19)	Bacteria(20);Proteobacteria(20);Betaproteobacteria(1),Gammaproteobacteria(19);Burkholderiales(1),Pseudomonadales(19);Pseudomonadaceae(1),Oxalobacteraceae(1),Moraxellaceae(18);Collimonas(1),Moraxella(1),Pseudomonas(1),Acinetobacter(17)	prophage(2),extrachromosomal(18)	linear (20)	VirSorter(20)	49
Cluster_97	19	16	hallmark(16),NCBI_RefSeq(3),refseq(16)	Viruses(19);dsDNA viruses no RNA stage(19);Caudovirales(19);Myoviridae(19);Hpunalikevirus(18);unknown(16)	Bacteria(19);Proteobacteria(19);Gammaproteobacteria(19);Vibrionales(19);Vibrionaceae(19);Vibrio(19)	prophppppge(16),complete(3)	linear (16)	RefSeq(3),VirSorter(16)	45
Cluster_98	19	0	NCBI_RefSeq(19)	Viruses(19);dsDNA viruses no RNA stage(19);Caudovirales(19);Podoviridae(19)	Bacteria(1),Bacteria(18);Proteobacteria(19);Betaproteobacteria(1),Gammaproteobacteria(18);Burkholderiales(1),Vibrionales(1),Enterobacteriales(3),Pseudomonadales(14);Vibrionaceae(1),Burkholderiaceae(1),Moraxellaceae(2),Enterobacteriaceae(3),Pseudomonadaceae(12);Klebsiella(1),Vibrio(1),Ralstonia(1),Acinetobacter(1),Pantoea(2),Pseudomonas(12)	complete(19)	-	RefSeq(19)
Cluster_99	19	19	hallmark(15),phage(19)	Viruses(19);dsDNA viruses no RNA stage(19);Caudovirales(19);unclassified(1),Myoviridae(18);unknown(19);unknown(19)	Bacteria(19);Firmicutes(19);Clostridia(19);Clostridiales(19);Peptostreptococcaceae(19);unknown(19)	prophage(2),extrachromosomal(17)	linear (19)	VirSorter(19)	67
Cluster_102	19	19	hallmark(19),phage(19)	Viruses(19);dsDNA viruses no RNA stage(19);Caudovirales(19);unclassified(1),Podoviridae(18);unclassified(1),unknown(18);unknown(19)	Bacteria(19);Proteobacteria(19);Gammaproteobacteria(19);Enterobacteriales(19);Enterobacteriaceae(19);Klebsiella(19)	extrachromosomal(19)	linear (19)	VirSorter(19)	31
Cluster_96	19	19	hallmark(8),phage(19)	Viruses(19);dsDNA viruses no RNA stage(19);Caudovirales(19);unclassified(1),Siphoviridae(18);unclassified(1),unknown(18);unknown(19)	Bacteria(19);Firmicutes(19);Bacilli(19);Lactobacillales(19);Lactobacillaceae(19);Lactobacillus(19)	prophage(2),extrachromosomal(17)	linear (19)	VirSorter(19)	56
Cluster_103	19	3	hallmark(2),NCBI_RefSeq(16),refseq(3)	Viruses(19);dsDNA viruses no RNA stage(19);Caudovirales(19);Siphoviridae(19);unclassified(2),L5likevirus(3);unknown(1),unclassified(2)	Bacteria(19);Actinobacteria(19);Actinobacteria(19);Actinomycetales(19);Nocardiaceae(1),Nocardiopsaceae(1),Pseudonocardiaceae(1),Mycobacteriaceae(16);Rhodococcus(1),Nocardiopsis(1),Actinokineospora(1),unknown(4),Mycobacterium(12)	prophage(1),complete(16),extrachromosomal(2)	linear (3)	RefSeq(16),VirSorter(3)	83
Cluster_100	19	18	hallmark(17),NCBI_RefSeq(1),refseq(18)	Viruses(19);dsDNA viruses no RNA stage(19);Caudovirales(19);Myoviridae(4),Siphoviridae(5),unclassified(10);Mulikevirus(1),unknown(2),Lambdalikevirus(4),unclassified(11);unknown(18)	Bacteria(19);Proteobacteria(19);Gammaproteobacteria(19);Pasteurellales(1),Pseudomonadales(18);Pasteurellaceae(1),Pseudomonadaceae(18);Actinobacillus(1),Pseudomonas(18)	prophage(8),complete(1),extrachromosomal(10)	linear (18)	RefSeq(1),VirSorter(18)	64
Cluster_101	19	19	hallmark(18),vdb(1),noncaudo(1),phage(15)	Viruses(19);dsDNA viruses no RNA stage(19);Caudovirales(19);Siphoviridae(2),Myoviridae(6),unclassified(11);unknown(1),Tunalikevirus(1),Lambdalikevirus(1),Mulikevirus(4),unclassified(12);unknown(19)	Bacteria(19);Proteobacteria(19);Deltaproteobacteria(1),Gammaproteobacteria(2),Alphaproteobacteria(16);Alteromonadales(1),Rhodospirillales(1),Enterobacteriales(1),Syntrophobacterales(1),Rhodobacterales(2),Rhizobiales(13);Enterobacteriaceae(1),Brucellaceae(1),Syntrophaceae(1),Methylocystaceae(1),Idiomarinaceae(1),Acetobacteraceae(1),Rhodobacteraceae(2),Bartonellaceae(11);Ruegeria(1),Acetobacter(1),…	prophage(6),extrachromosomal(13)	linear (19)	VirSorter(19)	59
Cluster_110	18	18	hallmark(18)	Viruses(18);dsDNA viruses no RNA stage(18);Caudovirales(18);Siphoviridae(3),Myoviridae(4),unclassified(11);Twortlikevirus(1),(2),unknown(6),unclassified(9);unclassified(3),unknown(15)	Bacteria(18);Spirochaetes(18);Spirochaetia(18);Spirochaetales(18);Leptospiraceae(18);Leptospira(18)	extrachromosomal(18)	circular (6) linear (12)	VirSorter(18)	106
Cluster_104	18	18	hallmark(18),phage(17)	Viruses(18);dsDNA viruses no RNA stage(18);Caudovirales(18);unclassified(2),Myoviridae(16);unknown(3),unclassified(15);unknown(18)	Bacteria(18);Firmicutes(18);Clostridia(18);Thermoanaerobacterales(2),Clostridiales(16);Thermoanaerobacteraceae(2),Peptostreptococcaceae(16);Thermoanaerobacter(2),unknown(16)	prophage(4),extrachromosomal(14)	linear (18)	VirSorter(18)	83
Cluster_109	18	18	phage(18)	Viruses(18);dsDNA viruses no RNA stage(18);Caudovirales(18);unclassified(1),Siphoviridae(17);Lambdalikevirus(1),unclassified(3),unknown(14);unknown(18)	Bacteria(18);Proteobacteria(18);Gammaproteobacteria(18);Pseudomonadales(18);Moraxellaceae(18);Acinetobacter(18)	extrachromosomal(18)	linear (18)	VirSorter(18)	25
Cluster_106	18	15	hallmark(15),NCBI_RefSeq(3),refseq(15)	Viruses(18);unclassified phages(4),dsDNA viruses no RNA stage(7),unclassified(7);(3),Caudovirales(7),unclassified(7);(3),unclassified(7),Siphoviridae(7);unclassified(1),unknown(14);unknown(15)	Bacteria(18);Firmicutes(18);unknown(1),Bacilli(17);unknown(1),Lactobacillales(17);unknown(1),Streptococcaceae(17);unknown(1),Streptococcus(17)	prophage(11),complete(3),extrachromosomal(4)	linear (15)	RefSeq(3),VirSorter(15)	66
Cluster_105	18	18	hallmark(17),vdb(2),phage(10)	Viruses(18);dsDNA viruses no RNA stage(18);Caudovirales(18);Siphoviridae(7),unclassified(11);unknown(3),Lambdalikevirus(3),unclassified(12);unclassified(2),unknown(16)	Bacteria(18);Firmicutes(18);Bacilli(18);Bacillales(18);Paenibacillaceae(3),Bacillaceae(15);Paenibacillus(1),Aneurinibacillus(1),Brevibacillus(1),Bacillus(15)	prophage(5),extrachromosomal(13)	linear (18)	VirSorter(18)	79
Cluster_107	18	17	hallmark(17),NCBI_RefSeq(1),refseq(17)	Viruses(18);unclassified(1),unclassified phages(17);unclassified(1),unknown(16);unclassified(1),unknown(16);unknown(17);unknown(17)	Bacteria(18);Firmicutes(18);Bacilli(18);Lactobacillales(18);Enterococcaceae(18);Enterococcus(18)	complete(1),extrachromosomal(17)	linear (17)	RefSeq(1),VirSorter(17)	49
Cluster_108	18	18	hallmark(18)	Viruses(18);dsDNA viruses no RNA stage(18);Caudovirales(18);unclassified(1),Siphoviridae(1),Myoviridae(16);unclassified(1),Lambdalikevirus(1),Twortlikevirus(5),Hpunalikevirus(11);unclassified(1),unknown(17)	Bacteria(18);Spirochaetes(18);Spirochaetia(18);Spirochaetales(18);Leptospiraceae(18);Leptospira(18)	prophage(3),extrachromosomal(15)	linear (18)	VirSorter(18)	85
Cluster_113	17	17	hallmark(13),vdb(4),phage(4)	Viruses(17);dsDNA viruses no RNA stage(17);Caudovirales(17);unclassified(8),Siphoviridae(9);unknown(1),Lambdalikevirus(7),unclassified(9);unclassified(1),unknown(16)	Bacteria(17);Bacteroidetes(17);Cytophagia(1),Flavobacteriia(3),Bacteroidia(13);Cytophagales(1),Flavobacteriales(3),Bacteroidales(13);Flammeovirgaceae(1),Porphyromonadaceae(2),Flavobacteriaceae(3),Bacteroidaceae(3),Prevotellaceae(8);Riemerella(1),Fulvivirga(1),Porphyromonas(2),Capnocytophaga(2),Bacteroides(3),Prevotella(8)	extrachromosomal(17)	linear (17)	VirSorter(17)	52
Cluster_111	17	17	hallmark(13),vdb(3),phage(17)	Viruses(17);dsDNA viruses no RNA stage(17);Caudovirales(17);Myoviridae(17);unknown(17);unknown(17)	Bacteria(17);Firmicutes(17);Clostridia(17);Clostridiales(17);Peptostreptococcaceae(17);unknown(17)	prophage(1),extrachromosomal(16)	linear (17)	VirSorter(17)	40
Cluster_112	17	7	NCBI_RefSeq(10),noncaudo(1),refseq(6)	Viruses(17);dsDNA viruses no RNA stage(17);unknown(7),(10);Fuselloviridae(17);Betafusellovirus(2),Alphafusellovirus(14);unknown(7)	Archaea(17);Crenarchaeota(17);Thermoprotei(17);Sulfolobales(17);Sulfolobaceae(17);Metallosphaera(1),Acidianus(1),unknown(1),Sulfolobus(14)	prophage(5),complete(10),extrachromosomal(2)	linear (7)	RefSeq(10),VirSorter(7)	63
Cluster_114	16	16	hallmark(15),phage(8)	Viruses(16);dsDNA viruses no RNA stage(16);Caudovirales(16);unclassified(3),Siphoviridae(4),Podoviridae(9);unclassified(1),Lambdalikevirus(1),Spbetalikevirus(1),unknown(13);unknown(16)	Bacteria(16);Proteobacteria(16);Alphaproteobacteria(1),Gammaproteobacteria(15);Rhodospirillales(1),Oceanospirillales(1),Enterobacteriales(3),Pseudomonadales(11);unknown(1),Rhodospirillaceae(1),Enterobacteriaceae(3),Moraxellaceae(11);Escherichia(1),Azospirillum(1),SUP05(1),Yersinia(1),Sodalis(1),Acinetobacter(11)	prophage(5),extrachromosomal(11)	circular (2) linear (14)	VirSorter(16)	52
Cluster_116	16	15	hallmark(11),NCBI_RefSeq(1),refseq(15)	Viruses(16);dsDNA viruses no RNA stage(16);Caudovirales(16);Myoviridae(1),unclassified(2),Siphoviridae(13);Spounalikevirus(1),Lambdalikevirus(1),unclassified(2),unknown(11);unknown(15)	Bacteria(16);Firmicutes(16);Bacilli(16);Bacillales(16);Bacillaceae(16);Bacillus(16)	complete(1),extrachromosomal(15)	circular (8) linear (7)	RefSeq(1),VirSorter(15)	87
Cluster_117	16	16	hallmark(16)	Viruses(16);dsDNA viruses no RNA stage(16);Caudovirales(16);Siphoviridae(16);Lambdalikevirus(16);unknown(16)	Bacteria(16);Proteobacteria(16);Gammaproteobacteria(16);Enterobacteriales(16);Enterobacteriaceae(16);Klebsiella(16)	extrachromosomal(16)	linear (16)	VirSorter(16)	23
Cluster_115	16	16	hallmark(15),phage(16)	Viruses(16);dsDNA viruses no RNA stage(2),unclassified(7),unclassified phages(7);Caudovirales(2),(7),unclassified(7);Siphoviridae(2),(7),unclassified(7);unknown(16);unknown(16)	Bacteria(16);Firmicutes(16);Bacilli(16);Lactobacillales(16);Streptococcaceae(16);Streptococcus(16)	prophage(14),extrachromosomal(2)	linear (16)	VirSorter(16)	74
Cluster_118	16	0	NCBI_RefSeq(16)	Viruses(16);dsDNA viruses no RNA stage(16);Caudovirales(16);Siphoviridae(16)	Bacteria(16);Actinobacteria(16);Actinobacteria(16);Actinomycetales(16);Mycobacteriaceae(16);unknown(2),Mycobacterium(14)	complete(16)	-	RefSeq(16)
Cluster_122	15	15	hallmark(15),phage(14)	Viruses(15);dsDNA viruses no RNA stage(15);Caudovirales(15);unclassified(15);unclassified(15);unknown(15)	Bacteria(15);Proteobacteria(15);Gammaproteobacteria(15);Pseudomonadales(15);Moraxellaceae(15);Acinetobacter(15)	prophage(10),extrachromosomal(5)	linear (15)	VirSorter(15)	54
Cluster_125	15	11	hallmark(11),NCBI_RefSeq(4),noncaudo(1),refseq(10)	Viruses(15);dsDNA viruses no RNA stage(15);(4),unknown(11);Tectiviridae(15);Tectivirus(15);unknown(11)	Bacteria(15);Firmicutes(15);Bacilli(15);Bacillales(15);Paenibacillaceae(1),Bacillaceae(14);Brevibacillus(1),Bacillus(14)	prophage(1),complete(4),extrachromosomal(10)	linear (11)	RefSeq(4),VirSorter(11)	33
Cluster_119	15	15	hallmark(13),vdb(1),phage(15)	Viruses(15);dsDNA viruses no RNA stage(15);Caudovirales(15);Siphoviridae(15);Phic3unalikevirus(1),unclassified(2),unknown(12);unknown(15)	Bacteria(15);Firmicutes(15);Clostridia(1),Bacilli(14);Clostridiales(1),Bacillales(3),Lactobacillales(11);Peptostreptococcaceae(1),Bacillaceae(3),Enterococcaceae(11);unknown(1),Bacillus(3),Enterococcus(11)	prophage(6),extrachromosomal(9)	circular (2) linear (13)	VirSorter(15)	68
Cluster_121	15	15	hallmark(15),vdb(2),phage(1)	Viruses(15);dsDNA viruses no RNA stage(15);Caudovirales(15);Siphoviridae(2),unclassified(13);Lambdalikevirus(1),unclassified(5),unknown(9);unclassified(3),unknown(12)	Bacteria(15);Fusobacteria(1),Spirochaetes(14);Fusobacteriia(1),Spirochaetia(14);Fusobacteriales(1),Spirochaetales(14);Leptotrichiaceae(1),Leptospiraceae(14);Leptotrichia(1),Leptospira(14)	prophage(2),extrachromosomal(13)	linear (15)	VirSorter(15)	98
Cluster_120	15	14	hallmark(12),NCBI_RefSeq(1),refseq(14)	Viruses(15);dsDNA viruses no RNA stage(15);Caudovirales(15);Myoviridae(1),unclassified(2),Siphoviridae(12);Lambdalikevirus(1),unclassified(3),unknown(10);unknown(14)	Bacteria(15);Proteobacteria(15);Gammaproteobacteria(15);Pseudomonadales(15);Pseudomonadaceae(15);Pseudomonas(15)	prophage(8),complete(1),extrachromosomal(6)	circular (1) linear (13)	RefSeq(1),VirSorter(14)	76
Cluster_123	15	15	hallmark(15)	Viruses(15);dsDNA viruses no RNA stage(15);Caudovirales(15);Siphoviridae(1),unclassified(4),Podoviridae(10);P22likevirus(2),unclassified(4),unknown(9);unclassified(1),unknown(14)	Bacteria(15);Proteobacteria(15);Epsilonproteobacteria(15);Campylobacterales(15);Campylobacteraceae(15);Campylobacter(15)	extrachromosomal(15)	circular (1) linear (14)	VirSorter(15)	70
Cluster_124	15	13	NCBI_RefSeq(2),noncaudo(12),refseq(1)	Viruses(15);dsDNA viruses no RNA stage(1),unclassified(1),ssDNA viruses(13);(1),unclassified(1),unknown(12);(1),unclassified(1),unknown(12);Salterprovirus(1),unknown(3),unclassified(4),(6);unknown(13)	Archaea(15);Euryarchaeota(15);Halobacteria(15);Halobacteriales(15);Halobacteriaceae(15);Natrialba(1),Halorubrum(1),Halosimplex(1),Halomicrobium(2),Haloarcula(4),Haloferax(6)	prophage(10),complete(2),extrachromosomal(3)	linear (13)	RefSeq(2),VirSorter(13)	28
Cluster_129	14	13	hallmark(13),vdb(1),NCBI_RefSeq(1),refseq(13)	Viruses(14);dsDNA viruses no RNA stage(14);Caudovirales(14);Podoviridae(1),unclassified(2),Siphoviridae(11);Lambdalikevirus(2),unknown(4),unclassified(7);unclassified(1),unknown(12)	Bacteria(14);Firmicutes(14);Bacilli(1),Clostridia(13);Bacillales(1),Clostridiales(13);unknown(1),Clostridiaceae(2),Peptostreptococcaceae(11);Clostridium(1),Exiguobacterium(1),unknown(12)	prophage(1),complete(1),extrachromosomal(12)	linear (13)	RefSeq(1),VirSorter(13)	60
Cluster_130	14	12	NCBI_RefSeq(2),noncaudo(7),refseq(5)	Viruses(14);dsDNA viruses no RNA stage(1),ssDNA viruses(4),unclassified(9);Caudovirales(1),(2),unknown(2),unclassified(9);Myoviridae(1),Inoviridae(4),unclassified(9);Hpunalikevirus(1),Inovirus(4),unclassified(9);unknown(12)	Bacteria(14);Proteobacteria(14);Gammaproteobacteria(14);Alteromonadales(1),Vibrionales(13);unknown(1),Vibrionaceae(13);Teredinibacter(1),Vibrio(13)	prophage(10),complete(2),extrachromosomal(2)	linear (12)	RefSeq(2),VirSorter(12)	15
Cluster_128	14	14	vdb(1),noncaudo(10),phage(4)	Viruses(14);unclassified(2),dsDNA viruses no RNA stage(3),ssDNA viruses(9);unclassified(2),Caudovirales(3),unknown(9);Myoviridae(2),unclassified(3),Inoviridae(9);Spounalikevirus(1),unknown(1),unclassified(3),Inovirus(9);unclassified(3),unknown(11)	Bacteria(14);Proteobacteria(14);Betaproteobacteria(14);Burkholderiales(14);Burkholderiaceae(14);Burkholderia(14)	prophage(13),extrachromosomal(1)	linear (14)	VirSorter(14)	15
Cluster_127	14	11	hallmark(11),NCBI_RefSeq(3),refseq(11)	Viruses(14);dsDNA viruses no RNA stage(14);Caudovirales(14);Siphoviridae(14);unclassified(11);unknown(11)	Bacteria(14);Firmicutes(14);Bacilli(14);Lactobacillales(14);Lactobacillaceae(14);Lactobacillus(14)	prophage(1),complete(3),extrachromosomal(10)	linear (11)	RefSeq(3),VirSorter(11)	63
Cluster_126	14	13	hallmark(13),vdb(2),NCBI_RefSeq(1),refseq(7)	Viruses(14);dsDNA viruses no RNA stage(14);Caudovirales(14);unclassified(2),Siphoviridae(12);unknown(1),Spbetalikevirus(1),unclassified(3),Lambdalikevirus(8);unclassified(1),unknown(12)	Bacteria(14);Verrucomicrobia(1),Proteobacteria(5),Firmicutes(8);Bacilli(1),Gammaproteobacteria(1),unknown(1),Betaproteobacteria(1),Alphaproteobacteria(3),Clostridia(7);Rhodospirillales(1),Burkholderiales(1),Bacillales(1),Rhizobiales(1),Alteromonadales(1),unknown(1),Rhodobacterales(1),Clostridiales(7);Alcaligenaceae(1),Pseudoalteromonadaceae(1),Rhodospirillaceae(1),unknown(1),Bacillaceae(1),Methyl…	prophage(4),complete(1),extrachromosomal(9)	circular (1) linear (12)	RefSeq(1),VirSorter(13)	80
Cluster_132	14	5	hallmark(4),NCBI_RefSeq(9),refseq(4)	Viruses(14);dsDNA viruses no RNA stage(14);Caudovirales(14);Siphoviridae(14);unknown(5);unknown(5)	Bacteria(14);Actinobacteria(14);Actinobacteria(14);Actinomycetales(14);Streptomycetaceae(1),Micromonosporaceae(1),Mycobacteriaceae(12);Streptomyces(1),Salinispora(1),unknown(2),Mycobacterium(10)	prophage(1),complete(9),extrachromosomal(4)	circular (1) linear (4)	RefSeq(9),VirSorter(5)	99
Cluster_131	14	14	hallmark(9),phage(14)	Viruses(14);dsDNA viruses no RNA stage(14);Caudovirales(6),unclassified(8);Myoviridae(1),Siphoviridae(5),unclassified(8);T4likevirus(1),Lambdalikevirus(5),unclassified(8);unknown(14)	Bacteria(14);Proteobacteria(14);Alphaproteobacteria(1),Gammaproteobacteria(13);Rhizobiales(1),Vibrionales(13);Brucellaceae(1),Vibrionaceae(13);Brucella(1),Vibrio(13)	prophage(2),extrachromosomal(12)	circular (2) linear (12)	VirSorter(14)	47
Cluster_136	13	13	hallmark(13),vdb(2)	Viruses(13);dsDNA viruses no RNA stage(13);Caudovirales(13);Siphoviridae(13);Phic3unalikevirus(1),Yualikevirus(1),unknown(1),Lambdalikevirus(4),unclassified(6);unknown(13)	Bacteria(13);Proteobacteria(13);Alphaproteobacteria(13);Rhizobiales(1),Rhodospirillales(1),Sphingomonadales(1),Rhodobacterales(10);Bartonellaceae(1),Sphingomonadaceae(1),Rhodospirillaceae(1),Rhodobacteraceae(10);Citreicella(1),Oceaniovalibus(1),Loktanella(1),unknown(1),Bartonella(1),Magnetospirillum(1),Rhodobacter(7)	prophage(1),extrachromosomal(12)	linear (13)	VirSorter(13)	68
Cluster_134	13	11	hallmark(9),vdb(1),NCBI_RefSeq(2),refseq(11)	Viruses(13);dsDNA viruses no RNA stage(13);Caudovirales(13);Siphoviridae(1),Myoviridae(5),unclassified(7);(1),Lambdalikevirus(1),unclassified(9);unclassified(2),unknown(9)	Bacteria(13);Firmicutes(1),Proteobacteria(12);Clostridia(1),Gammaproteobacteria(12);Xanthomonadales(1),Clostridiales(1),Enterobacteriales(3),Pasteurellales(8);Xanthomonadaceae(1),Clostridiaceae(1),Enterobacteriaceae(3),Pasteurellaceae(8);Salmonella(1),Actinobacillus(1),Clostridium(1),Xanthomonas(1),Enterobacter(1),Erwinia(1),Avibacterium(2),Haemophilus(5)	prophage(4),complete(2),extrachromosomal(7)	linear (11)	RefSeq(2),VirSorter(11)	75
Cluster_133	13	13	hallmark(5),phage(13)	Viruses(13);dsDNA viruses no RNA stage(13);Caudovirales(13);Siphoviridae(13);C2likevirus(1),Phic3unalikevirus(2),unclassified(3),unknown(7);unknown(13)	Bacteria(13);Firmicutes(13);Bacilli(13);Lactobacillales(13);Lactobacillaceae(13);Lactobacillus(13)	prophage(1),extrachromosomal(12)	linear (13)	VirSorter(13)	59
Cluster_137	13	9	hallmark(7),NCBI_RefSeq(4),refseq(9)	Viruses(13);unclassified(1),dsDNA viruses no RNA stage(12);unclassified(1),Caudovirales(12);Siphoviridae(2),unclassified(4),Myoviridae(7);unknown(4),unclassified(5);unclassified(3),unknown(6)	Bacteria(13);Proteobacteria(13);Alphaproteobacteria(1),Betaproteobacteria(1),Gammaproteobacteria(11);Rhizobiales(1),Neisseriales(1),Pseudomonadales(5),Enterobacteriales(6);Rhizobiaceae(1),Neisseriaceae(1),Pseudomonadaceae(5),Enterobacteriaceae(6);Serratia(1),Kosakonia(1),Yersinia(1),Sinorhizobium(1),Iodobacter(1),Klebsiella(1),Edwardsiella(2),Pseudomonas(5)	prophage(2),complete(4),extrachromosomal(7)	linear (9)	RefSeq(4),VirSorter(9)	72
Cluster_135	13	12	hallmark(11),NCBI_RefSeq(1),refseq(12)	Viruses(13);dsDNA viruses no RNA stage(13);Caudovirales(13);Siphoviridae(13);unclassified(2),unknown(10);unclassified(2),unknown(10)	Bacteria(13);Firmicutes(13);Bacilli(13);Bacillales(13);Bacillaceae(13);Caldalkalibacillus(1),Bacillus(12)	prophage(1),complete(1),extrachromosomal(11)	circular (3) linear (9)	RefSeq(1),VirSorter(12)	101
Cluster_138	13	13	hallmark(12),vdb(4),phage(8)	Viruses(13);dsDNA viruses no RNA stage(13);Caudovirales(13);unclassified(3),Siphoviridae(10);unclassified(2),unknown(2),Lambdalikevirus(9);unclassified(1),unknown(12)	Bacteria(13);Firmicutes(13);Clostridia(1),Bacilli(12);Bacillales(1),Clostridiales(1),Lactobacillales(11);Planococcaceae(1),Peptostreptococcaceae(1),Lactobacillaceae(11);unknown(1),Kurthia(1),Lactobacillus(11)	prophage(1),extrachromosomal(12)	linear (13)	VirSorter(13)	46
Cluster_140	13	4	hallmark(4),NCBI_RefSeq(9),noncaudo(2),refseq(2)	Viruses(13);ssDNA viruses(13);unknown(4),(9);Microviridae(13);Spiromicrovirus(1),Bdellomicrovirus(1),Chlamydiamicrovirus(9);unknown(4)	unknown(2),Bacteria(11);Cyanobacteria(1),Tenericutes(1),Firmicutes(1),Proteobacteria(3),Chlamydiae(5);Clostridia(1),Alphaproteobacteria(1),Gammaproteobacteria(1),Mollicutes(1),unknown(1),Deltaproteobacteria(1),Chlamydiia(5);Entomoplasmatales(1),Bdellovibrionales(1),Nostocales(1),Sphingomonadales(1),Oceanospirillales(1),Clostridiales(1),Chlamydiales(5);Nostocaceae(1),Sphingomonadaceae(1),unknown(1…	prophage(1),complete(9),extrachromosomal(3)	linear (4)	RefSeq(9),VirSorter(4)	9
Cluster_139	13	13	hallmark(1),noncaudo(13)	Viruses(13);unclassified(1),ssDNA viruses(12);unclassified(1),unknown(12);unclassified(1),unknown(12);unclassified(1),(4),unknown(8);unknown(13)	Archaea(13);Euryarchaeota(13);Halobacteria(13);Halobacteriales(13);Halobacteriaceae(13);Halosimplex(1),Halorhabdus(1),Halomicrobium(2),Haloarcula(9)	prophage(13)	linear (13)	VirSorter(13)	55
Cluster_147	12	12	hallmark(12)	Viruses(12);dsDNA viruses no RNA stage(12);Caudovirales(12);Myoviridae(1),unclassified(11);Twortlikevirus(1),unknown(1),unclassified(10);unknown(12)	Bacteria(12);Spirochaetes(12);Spirochaetia(12);Spirochaetales(12);Leptospiraceae(12);Leptospira(12)	prophage(1),extrachromosomal(11)	linear (12)	VirSorter(12)	86
Cluster_141	12	9	hallmark(9),NCBI_RefSeq(3),refseq(9)	Viruses(12);unclassified phages(1),dsDNA viruses no RNA stage(11);Caudovirales(11);Myoviridae(2),Siphoviridae(3),unclassified(6);Phic3unalikevirus(1),unknown(4),unclassified(4);unclassified(3),unknown(6)	Bacteria(12);Firmicutes(12);Clostridia(1),Negativicutes(1),Bacilli(10);Selenomonadales(1),Clostridiales(1),Lactobacillales(10);Veillonellaceae(1),Clostridiaceae(1),Enterococcaceae(2),Lactobacillaceae(8);Clostridium(1),Megasphaera(1),Enterococcus(2),Lactobacillus(8)	prophage(3),complete(3),extrachromosomal(6)	circular (1) linear (8)	RefSeq(3),VirSorter(9)	100
Cluster_144	12	0	NCBI_RefSeq(12)	Viruses(12);dsDNA viruses no RNA stage(12);Caudovirales(12);Myoviridae(12);I3likevirus(10)	Bacteria(12);Actinobacteria(12);Actinobacteria(12);Actinomycetales(12);Nocardiaceae(1),Mycobacteriaceae(11);Rhodococcus(1),unknown(2),Mycobacterium(9)	complete(12)	-	RefSeq(12)
Cluster_151	12	0	NCBI_RefSeq(12)	Viruses(12);dsDNA viruses no RNA stage(12);Caudovirales(12);Myoviridae(12)	Bacteria(12);Proteobacteria(12);Betaproteobacteria(1),Gammaproteobacteria(11);Burkholderiales(1),Enterobacteriales(11);Comamonadaceae(1),Enterobacteriaceae(11);Shigella(1),Serratia(1),Escherichia(1),Delftia(1),Klebsiella(1),Dickeya(1),Salmonella(3),unknown(3)	complete(12)	-	RefSeq(12)
Cluster_156	12	11	NCBI_RefSeq(1),refseq(11)	Viruses(12);ssDNA viruses(12);unknown(11);unknown(11);unknown(11);unknown(11)	Archaea(12);Euryarchaeota(12);Halobacteria(12);Halobacteriales(12);Halobacteriaceae(12);Halococcus(1),Halogeometricum(1),Haloterrigena(1),Haloarcula(1),Natronococcus(1),Halorubrum(2),Haloferax(2),Natrialba(3)	complete(1),extrachromosomal(11)	circular (1) linear (10)	RefSeq(1),VirSorter(11)	11
Cluster_146	12	12	hallmark(12)	Viruses(12);dsDNA viruses no RNA stage(12);Caudovirales(12);Siphoviridae(2),unclassified(3),Myoviridae(7);Hpunalikevirus(1),Lambdalikevirus(2),unclassified(3),Twortlikevirus(6);unknown(12)	Bacteria(12);Spirochaetes(12);Spirochaetia(12);Spirochaetales(12);Leptospiraceae(12);Leptospira(12)	prophage(2),extrachromosomal(10)	linear (12)	VirSorter(12)	82
Cluster_153	12	10	hallmark(9),NCBI_RefSeq(2),noncaudo(9),refseq(1)	Viruses(12);ssDNA viruses(12);(2),unknown(10);Inoviridae(12);unknown(3),Inovirus(8);unknown(10)	Bacteria(12);Proteobacteria(12);Gammaproteobacteria(12);Xanthomonadales(12);Xanthomonadaceae(12);Stenotrophomonas(2),Xanthomonas(10)	prophage(8),complete(2),extrachromosomal(2)	linear (10)	RefSeq(2),VirSorter(10)	29
Cluster_154	12	0	NCBI_RefSeq(12)	Viruses(12);dsDNA viruses no RNA stage(12);Caudovirales(12);Myoviridae(9);Spounalikevirus(2)	Bacteria(12);Firmicutes(12);Bacilli(12);Bacillales(12);Bacillaceae(12);Bacillus(12)	complete(12)	-	RefSeq(12)
Cluster_150	12	12	hallmark(12),phage(5)	Viruses(12);dsDNA viruses no RNA stage(12);Caudovirales(12);unclassified(3),Myoviridae(4),Siphoviridae(5);unknown(2),Punalikevirus(4),unclassified(6);unclassified(3),unknown(9)	Bacteria(12);Firmicutes(12);Bacilli(12);Bacillales(12);Bacillaceae(12);Geobacillus(1),Bacillus(11)	prophage(4),extrachromosomal(8)	circular (1) linear (11)	VirSorter(12)	86
Cluster_155	12	4	hallmark(4),NCBI_RefSeq(8),refseq(4)	Viruses(12);dsDNA viruses no RNA stage(12);Caudovirales(12);Siphoviridae(12);unclassified(1),unknown(3);unclassified(1),unknown(3)	Bacteria(12);Actinobacteria(12);Actinobacteria(12);Actinomycetales(12);Tsukamurellaceae(1),Micromonosporaceae(2),Nocardiaceae(2),Mycobacteriaceae(7);Actinoplanes(1),Tsukamurella(1),Salinispora(1),Rhodococcus(2),unknown(3),Mycobacterium(4)	prophage(1),complete(8),extrachromosomal(3)	linear (4)	RefSeq(8),VirSorter(4)	68
Cluster_145	12	11	hallmark(11),NCBI_RefSeq(1),refseq(11)	Viruses(12);dsDNA viruses no RNA stage(1),unclassified phages(1),unclassified(10);Caudovirales(1),unclassified(10);Siphoviridae(1),unclassified(10);unclassified(11);unclassified(1),unknown(10)	Bacteria(12);Firmicutes(12);Clostridia(1),Bacilli(11);Clostridiales(1),Bacillales(4),Lactobacillales(7);Carnobacteriaceae(1),Peptostreptococcaceae(1),Bacillaceae(4),Enterococcaceae(6);unknown(1),Carnobacterium(1),Bacillus(4),Enterococcus(6)	prophage(1),complete(1),extrachromosomal(10)	circular (1) linear (10)	RefSeq(1),VirSorter(11)	50
Cluster_148	12	12	hallmark(12),phage(11)	Viruses(12);dsDNA viruses no RNA stage(12);Caudovirales(12);unclassified(1),Siphoviridae(11);Spbetalikevirus(1),unknown(5),unclassified(6);unclassified(3),unknown(9)	Bacteria(12);Proteobacteria(12);Gammaproteobacteria(12);Pseudomonadales(4),Enterobacteriales(8);Pseudomonadaceae(4),Enterobacteriaceae(8);Pseudomonas(4),Klebsiella(8)	prophage(5),extrachromosomal(7)	linear (12)	VirSorter(12)	100
Cluster_143	12	12	hallmark(11),vdb(1),noncaudo(1),phage(10)	Viruses(12);unclassified(1),ssDNA viruses(1),dsDNA viruses no RNA stage(10);unclassified(1),unknown(1),Caudovirales(10);unclassified(1),Inoviridae(1),Siphoviridae(10);Plectrovirus(1),unclassified(4),unknown(7);unclassified(1),unknown(11)	Bacteria(12);Firmicutes(12);Bacilli(12);Bacillales(1),Lactobacillales(11);Leuconostocaceae(1),Staphylococcaceae(1),Lactobacillaceae(2),Streptococcaceae(8);Fructobacillus(1),Staphylococcus(1),Lactobacillus(2),Streptococcus(8)	prophage(3),extrachromosomal(9)	linear (12)	VirSorter(12)	34
Cluster_152	12	12	hallmark(2),vdb(2),phage(10)	Viruses(12);dsDNA viruses no RNA stage(12);Caudovirales(12);unclassified(2),Myoviridae(10);(1),unclassified(1),unknown(10);unclassified(2),unknown(10)	Bacteria(12);Firmicutes(12);Bacilli(1),Clostridia(11);Bacillales(1),Clostridiales(11);unknown(1),Paenibacillaceae(1),Clostridiaceae(1),Peptostreptococcaceae(9);Clostridium(1),Paenibacillus(1),Flavonifractor(1),unknown(9)	prophage(2),extrachromosomal(10)	linear (12)	VirSorter(12)	63
Cluster_149	12	2	hallmark(1),NCBI_RefSeq(10),refseq(2)	Viruses(12);dsDNA viruses no RNA stage(12);Caudovirales(11);Siphoviridae(10);unclassified(1),Lambdalikevirus(1);unknown(2)	Bacteria(12);Proteobacteria(12);Betaproteobacteria(2),Alphaproteobacteria(3),Gammaproteobacteria(7);Rhodobacterales(1),Burkholderiales(2),Caulobacterales(2),Enterobacteriales(7);Rhodobacteraceae(1),Burkholderiaceae(2),Caulobacteraceae(2),Enterobacteriaceae(7);unknown(1),Enterobacter(1),Providencia(1),Burkholderia(2),Asticcacaulis(2),Salmonella(4)	complete(10),extrachromosomal(2)	linear (2)	RefSeq(10),VirSorter(2)	76
Cluster_142	12	12	hallmark(12),phage(12)	Viruses(12);dsDNA viruses no RNA stage(12);Caudovirales(12);Siphoviridae(1),unclassified(11);Lambdalikevirus(1),unclassified(11);unknown(1),unclassified(11)	Bacteria(12);Proteobacteria(12);Gammaproteobacteria(12);Enterobacteriales(12);Enterobacteriaceae(12);Escherichia(12)	prophage(3),extrachromosomal(9)	linear (12)	VirSorter(12)	66
Cluster_172	11	9	hallmark(5),NCBI_RefSeq(2),noncaudo(7),refseq(2)	Viruses(11);dsDNA viruses no RNA stage(1),ssDNA viruses(10);Caudovirales(1),(2),unknown(8);Podoviridae(1),Inoviridae(10);P22likevirus(1),Inovirus(8);unknown(9)	Bacteria(11);Proteobacteria(11);Betaproteobacteria(11);Methylophilales(1),Burkholderiales(10);Methylophilaceae(1),Oxalobacteraceae(1),Burkholderiaceae(9);Collimonas(1),Methylovorus(1),Ralstonia(9)	prophage(8),complete(2),extrachromosomal(1)	linear (9)	RefSeq(2),VirSorter(9)	28
Cluster_165	11	11	hallmark(2),vdb(2),noncaudo(11)	Viruses(11);ssDNA viruses(11);unknown(11);Inoviridae(11);Inovirus(11);unknown(11)	Bacteria(11);Proteobacteria(11);Gammaproteobacteria(11);Pseudomonadales(11);Moraxellaceae(11);Moraxella(1),Acinetobacter(10)	prophage(2),extrachromosomal(9)	circular (2) linear (9)	VirSorter(11)	24
Cluster_158	11	9	hallmark(4),vdb(1),NCBI_RefSeq(2),refseq(7)	Viruses(11);dsDNA viruses no RNA stage(11);Caudovirales(11);Myoviridae(2),unclassified(4),Siphoviridae(5);unknown(1),(2),unclassified(2),Lambdalikevirus(4);unclassified(4),unknown(5)	Bacteria(11);Synergistetes(1),Firmicutes(3),Proteobacteria(7);Synergistia(1),Negativicutes(1),Clostridia(2),Gammaproteobacteria(7);Selenomonadales(1),Synergistales(1),Clostridiales(2),Enterobacteriales(7);Ruminococcaceae(1),Veillonellaceae(1),Synergistaceae(1),Peptostreptococcaceae(1),Enterobacteriaceae(7);Anaeromusa(1),unknown(1),Anaerotruncus(1),Pyramidobacter(1),Yersinia(2),Salmonella(2),Esche…	prophage(1),complete(2),extrachromosomal(8)	linear (9)	RefSeq(2),VirSorter(9)	68
Cluster_166	11	11	hallmark(11),phage(11)	Viruses(11);unclassified(1),dsDNA viruses no RNA stage(10);unclassified(1),Caudovirales(10);unclassified(1),Siphoviridae(10);C2likevirus(1),unknown(10);unknown(11)	Bacteria(11);Firmicutes(11);Bacilli(11);Lactobacillales(11);Streptococcaceae(11);Streptococcus(11)	prophage(9),extrachromosomal(2)	linear (11)	VirSorter(11)	55
Cluster_167	11	11	hallmark(11),vdb(4)	Viruses(11);dsDNA viruses no RNA stage(11);Caudovirales(11);Podoviridae(1),Siphoviridae(10);unclassified(1),P22likevirus(1),Spbetalikevirus(2),unknown(7);unclassified(1),unknown(10)	Bacteria(11);Proteobacteria(1),Firmicutes(10);Gammaproteobacteria(1),Bacilli(2),Clostridia(8);Thiotrichales(1),Bacillales(2),Clostridiales(8);unknown(1),Clostridiaceae(1),Bacillaceae(2),Peptostreptococcaceae(7);Clostridium(1),Bacillus(2),unknown(8)	extrachromosomal(11)	circular (1) linear (10)	VirSorter(11)	58
Cluster_164	11	10	hallmark(8),NCBI_RefSeq(1),refseq(10)	Viruses(11);dsDNA viruses no RNA stage(11);Caudovirales(11);Siphoviridae(11);Lambdalikevirus(2),unknown(3),unclassified(5);unknown(10)	Bacteria(11);Proteobacteria(11);Gammaproteobacteria(11);Pseudomonadales(11);Pseudomonadaceae(11);Pseudomonas(11)	prophage(4),complete(1),extrachromosomal(6)	circular (1) linear (9)	RefSeq(1),VirSorter(10)	66
Cluster_170	11	0	NCBI_RefSeq(11)	Viruses(11);dsDNA viruses no RNA stage(11);Caudovirales(11);Myoviridae(11)	Bacteria(11);Proteobacteria(11);Betaproteobacteria(2),Gammaproteobacteria(9);Burkholderiales(2),Pseudomonadales(9);Burkholderiaceae(2),Pseudomonadaceae(9);Burkholderia(2),Pseudomonas(9)	complete(11)	-	RefSeq(11)
Cluster_159	11	7	hallmark(7),NCBI_RefSeq(4),refseq(7)	Viruses(11);dsDNA viruses no RNA stage(11);Caudovirales(11);Podoviridae(1),Siphoviridae(10);Lambdalikevirus(3),unknown(4);unknown(7)	Bacteria(11);Firmicutes(11);Bacilli(11);Lactobacillales(11);Lactobacillaceae(1),Streptococcaceae(10);Pediococcus(1),Lactococcus(10)	prophage(3),complete(4),extrachromosomal(4)	linear (7)	RefSeq(4),VirSorter(7)	60
Cluster_171	11	8	NCBI_RefSeq(3),noncaudo(3),refseq(5)	Viruses(11);dsDNA viruses no RNA stage(1),ssDNA viruses(10);Caudovirales(1),(3),unknown(7);Myoviridae(1),Inoviridae(10);T4likevirus(1),Plectrovirus(10);unknown(8)	Bacteria(11);Tenericutes(11);Mollicutes(11);Entomoplasmatales(11);Spiroplasmataceae(11);Spiroplasma(11)	prophppppge(8),complete(3)	linear (8)	RefSeq(3),VirSorter(8)	98
Cluster_173	11	0	NCBI_RefSeq(11)	Viruses(11);dsDNA viruses no RNA stage(11);Caudovirales(11);Siphoviridae(11)	Bacteria(11);Firmicutes(11);Bacilli(11);Lactobacillales(11);Streptococcaceae(11);unknown(1),Lactococcus(10)	complete(11)	-	RefSeq(11)
Cluster_161	11	10	hallmark(10),NCBI_RefSeq(1),refseq(8)	Viruses(11);dsDNA viruses no RNA stage(11);Caudovirales(11);Siphoviridae(11);Lambdalikevirus(3),unclassified(7);unknown(10)	Bacteria(11);Firmicutes(11);Clostridia(1),unknown(1),Bacilli(9);unknown(1),Clostridiales(1),Bacillales(3),Lactobacillales(6);Staphylococcaceae(1),unknown(1),Paenibacillaceae(1),Bacillaceae(1),Clostridiaceae(1),Lactobacillaceae(6);Clostridium(1),Paenibacillus(1),unknown(1),Bacillus(1),Staphylococcus(1),Lactobacillus(6)	complete(1),extrachromosomal(10)	circular (1) linear (9)	RefSeq(1),VirSorter(10)	53
Cluster_169	11	11	hallmark(11),phage(9)	Viruses(11);dsDNA viruses no RNA stage(11);Caudovirales(11);Myoviridae(1),unclassified(2),Siphoviridae(8);unknown(1),unclassified(2),Tunalikevirus(8);unclassified(1),unknown(10)	Bacteria(11);Proteobacteria(11);Gammaproteobacteria(11);Pseudomonadales(11);Moraxellaceae(11);Acinetobacter(11)	prophage(1),extrachromosomal(10)	linear (11)	VirSorter(11)	69
Cluster_157	11	8	hallmark(8),vdb(3),NCBI_RefSeq(3),refseq(8)	Viruses(11);dsDNA viruses no RNA stage(11);Caudovirales(11);Siphoviridae(11);unclassified(2),unknown(6);unclassified(2),unknown(6)	Bacteria(11);Firmicutes(11);Bacilli(11);Bacillales(1),Lactobacillales(10);Streptococcaceae(1),Leuconostocaceae(1),Listeriaceae(1),Enterococcaceae(3),Lactobacillaceae(5);Oenococcus(1),Brochothrix(1),Lactococcus(1),Enterococcus(3),Lactobacillus(5)	prophage(4),complete(3),extrachromosomal(4)	linear (8)	RefSeq(3),VirSorter(8)	64
Cluster_163	11	11	noncaudo(11)	Viruses(11);ssDNA viruses(11);unknown(11);Inoviridae(11);Inovirus(11);unknown(11)	Bacteria(11);Proteobacteria(11);Gammaproteobacteria(11);Pseudomonadales(11);Pseudomonadaceae(11);Pseudomonas(11)	prophage(2),extrachromosomal(9)	circular (2) linear (9)	VirSorter(11)	24
Cluster_162	11	8	hallmark(8),NCBI_RefSeq(3),refseq(8)	Viruses(11);dsDNA viruses no RNA stage(11);Caudovirales(11);Siphoviridae(11);unknown(2),unclassified(6);unknown(8)	Bacteria(11);Firmicutes(11);Bacilli(11);Bacillales(11);Listeriaceae(11);Listeria(11)	prophage(5),complete(3),extrachromosomal(3)	linear (8)	RefSeq(3),VirSorter(8)	69
Cluster_160	11	1	vdb(1),NCBI_RefSeq(10),refseq(1)	Viruses(11);dsDNA viruses no RNA stage(11);Caudovirales(11);Siphoviridae(11);unknown(1);unknown(1)	Bacteria(11);Proteobacteria(11);Gammaproteobacteria(11);Pasteurellales(1),Enterobacteriales(10);Pasteurellaceae(1),Enterobacteriaceae(10);Serratia(1),Pasteurella(1),unknown(3),Salmonella(5)	complete(10),extrachromosomal(1)	linear (1)	RefSeq(10),VirSorter(1)	45
Cluster_168	11	11	hallmark(9),vdb(5),phage(5)	Viruses(11);dsDNA viruses no RNA stage(11);Caudovirales(11);unclassified(3),Siphoviridae(8);Tunalikevirus(1),unclassified(5),Lambdalikevirus(5);unclassified(1),unknown(10)	Bacteria(11);Planctomycetes(1),Proteobacteria(10);Alphaproteobacteria(1),Planctomycetia(1),Gammaproteobacteria(2),Betaproteobacteria(7);Methylococcales(1),Rhodospirillales(1),Planctomycetales(1),Oceanospirillales(1),Burkholderiales(7);Hahellaceae(1),Methylococcaceae(1),Planctomycetaceae(1),Rhodospirillaceae(1),Burkholderiaceae(3),Comamonadaceae(4);Gemmata(1),Hahella(1),Magnetospirillum(1),Methylo…	prophage(1),extrachromosomal(10)	linear (11)	VirSorter(11)	75
Cluster_174	10	10	phage(10)	Viruses(10);dsDNA viruses no RNA stage(3),unclassified phages(7);Caudovirales(3),unknown(7);unclassified(3),unknown(7);unclassified(3),unknown(7);unclassified(1),unknown(9)	Bacteria(10);Proteobacteria(10);Gammaproteobacteria(10);Enterobacteriales(10);Enterobacteriaceae(10);Escherichia(10)	extrachromosomal(10)	linear (10)	VirSorter(10)	44
Cluster_176	10	10	vdb(1),phage(10)	Viruses(10);dsDNA viruses no RNA stage(10);Caudovirales(10);Siphoviridae(1),Myoviridae(3),unclassified(6);unknown(3),unclassified(7);unknown(4),unclassified(6)	Bacteria(10);Firmicutes(10);Clostridia(10);Clostridiales(10);Peptostreptococcaceae(10);unknown(10)	extrachromosomal(10)	linear (10)	VirSorter(10)	115
Cluster_175	10	10	hallmark(1),noncaudo(10)	Viruses(10);unclassified(1),ssDNA viruses(9);unclassified(1),unknown(9);unclassified(1),Inoviridae(9);unclassified(1),Inovirus(9);unknown(10)	Bacteria(10);Bacteroidetes(1),Proteobacteria(9);Flavobacteriia(1),Gammaproteobacteria(9);Flavobacteriales(1),Pseudomonadales(9);Flavobacteriaceae(1),Pseudomonadaceae(9);Chryseobacterium(1),Pseudomonas(9)	prophage(4),extrachromosomal(6)	circular (3) linear (7)	VirSorter(10)	28
Cluster_177	10	9	hallmark(9),NCBI_RefSeq(1),refseq(4)	Viruses(10);dsDNA viruses no RNA stage(10);unclassified(2),Caudovirales(7);Siphoviridae(2),unclassified(3),Myoviridae(4);Tunalikevirus(1),unknown(8);unknown(9)	Bacteria(10);Proteobacteria(10);Gammaproteobacteria(2),Alphaproteobacteria(8);Xanthomonadales(1),Oceanospirillales(1),Rhizobiales(8);Brucellaceae(1),Halomonadaceae(1),Methylobacteriaceae(1),Xanthomonadaceae(1),Rhizobiaceae(6);Xanthomonas(1),Ochrobactrum(1),Methylobacterium(1),unknown(1),Sinorhizobium(6)	complete(1),extrachromosomal(9)	linear (9)	RefSeq(1),VirSorter(9)	114
Cluster_191	9	9	hallmark(9),phage(1)	Viruses(9);dsDNA viruses no RNA stage(9);Caudovirales(9);unclassified(1),Myoviridae(4),Siphoviridae(4);unknown(9);unknown(9)	Archaea(9);Euryarchaeota(9);Methanobacteria(9);Methanobacteriales(9);Methanobacteriaceae(9);Methanobrevibacter(9)	extrachromosomal(9)	circular (1) linear (8)	VirSorter(9)	51
Cluster_183	9	8	hallmark(8),vdb(1),NCBI_RefSeq(1),refseq(2)	Viruses(9);dsDNA viruses no RNA stage(9);Caudovirales(9);unclassified(1),Siphoviridae(8);unknown(1),unclassified(7);unclassified(3),unknown(5)	Bacteria(9);Proteobacteria(9);Epsilonproteobacteria(1),Alphaproteobacteria(1),Gammaproteobacteria(1),Betaproteobacteria(6);Alteromonadales(1),Campylobacterales(1),Sphingomonadales(1),Burkholderiales(6);Pseudoalteromonadaceae(1),Sphingomonadaceae(1),Campylobacteraceae(1),Alcaligenaceae(6);Pseudoalteromonas(1),Sphingobium(1),Campylobacter(1),Bordetella(6)	prophage(3),complete(1),extrachromosomal(5)	linear (8)	RefSeq(1),VirSorter(8)	62
Cluster_179	9	9	hallmark(9),phage(8)	Viruses(9);dsDNA viruses no RNA stage(9);Caudovirales(9);Myoviridae(1),Siphoviridae(2),unclassified(6);Mulikevirus(1),Lambdalikevirus(1),unclassified(7);unclassified(1),unknown(8)	Bacteria(9);Proteobacteria(9);Gammaproteobacteria(9);Pasteurellales(9);Pasteurellaceae(9);Pasteurella(1),Haemophilus(3),Mannheimia(5)	prophage(1),extrachromosomal(8)	linear (9)	VirSorter(9)	47
Cluster_192	9	2	hallmark(2),NCBI_RefSeq(7),refseq(2)	Viruses(9);dsDNA viruses no RNA stage(9);Caudovirales(9);Siphoviridae(9);unclassified(2);unclassified(2)	Bacteria(9);Firmicutes(9);Bacilli(9);Bacillales(9);Bacillaceae(9);Bacillus(9)	complete(7),extrachromosomal(2)	circular (2)	RefSeq(7),VirSorter(2)	79
Cluster_186	9	9	hallmark(9),phage(9)	Viruses(9);dsDNA viruses no RNA stage(9);Caudovirales(9);Siphoviridae(9);unknown(9);unknown(9)	Bacteria(9);Firmicutes(9);Bacilli(9);Bacillales(9);Bacillaceae(9);Bacillus(9)	prophage(1),extrachromosomal(8)	circular (2) linear (7)	VirSorter(9)	99
Cluster_181	9	9	hallmark(8),vdb(2),phage(4)	Viruses(9);dsDNA viruses no RNA stage(9);Caudovirales(9);Siphoviridae(2),unclassified(3),Myoviridae(4);Twortlikevirus(1),(1),Lambdalikevirus(1),unknown(2),unclassified(4);unclassified(3),unknown(6)	Bacteria(9);Proteobacteria(9);Epsilonproteobacteria(1),Gammaproteobacteria(1),Alphaproteobacteria(7);Alteromonadales(1),Campylobacterales(1),Rickettsiales(7);Helicobacteraceae(1),Pseudoalteromonadaceae(1),Holosporaceae(1),Anaplasmataceae(6);Holospora(1),Thiovulum(1),Pseudoalteromonas(1),Wolbachia(6)	prophage(3),extrachromosomal(6)	linear (9)	VirSorter(9)	86
Cluster_190	9	9	hallmark(9),vdb(2)	Viruses(9);dsDNA viruses no RNA stage(9);Caudovirales(9);unclassified(1),Myoviridae(1),Siphoviridae(7);unknown(3),unclassified(6);unclassified(1),unknown(8)	Bacteria(9);Proteobacteria(9);Deltaproteobacteria(9);Desulfovibrionales(1),Myxococcales(8);Desulfovibrionaceae(1),Cystobacteraceae(3),Myxococcaceae(5);Desulfovibrio(1),Stigmatella(3),Myxococcus(5)	extrachromosomal(9)	linear (9)	VirSorter(9)	93
Cluster_180	9	3	hallmark(3),NCBI_RefSeq(6),refseq(2)	Viruses(9);dsDNA viruses no RNA stage(9);Caudovirales(8);Siphoviridae(8);unknown(1),Lambdalikevirus(2);unknown(3)	Bacteria(9);Proteobacteria(9);Betaproteobacteria(2),Gammaproteobacteria(7);Oceanospirillales(1),Burkholderiales(2),Xanthomonadales(6);Alcaligenaceae(1),Oceanospirillaceae(1),Comamonadaceae(1),Xanthomonadaceae(6);Pusillimonas(1),unknown(1),Delftia(1),Xanthomonas(6)	complete(6),extrachromosomal(3)	linear (3)	RefSeq(6),VirSorter(3)	68
Cluster_182	9	2	hallmark(2),NCBI_RefSeq(7),refseq(1)	Viruses(9);dsDNA viruses no RNA stage(9);Caudovirales(9);Siphoviridae(1),Podoviridae(8);Phi29likevirus(5);unknown(2)	Bacteria(9);Bacteroidetes(1),Actinobacteria(2),Firmicutes(6);Bacteroidia(1),Actinobacteria(2),Bacilli(6);Actinomycetales(1),Bacteroidales(1),Coriobacteriales(1),Lactobacillales(2),Bacillales(4);Actinomycetaceae(1),Coriobacteriaceae(1),Bacteroidaceae(1),Streptococcaceae(2),Bacillaceae(4);Eggerthella(1),Streptococcus(1),Actinomyces(1),Lactococcus(1),Bacteroides(1),Bacillus(4)	complete(7),extrachromosomal(2)	linear (2)	RefSeq(7),VirSorter(2)	21
Cluster_187	9	9	hallmark(8),phage(1)	Viruses(9);dsDNA viruses no RNA stage(9);Caudovirales(9);Siphoviridae(9);Lambdalikevirus(9);unknown(9)	Bacteria(9);Proteobacteria(9);Betaproteobacteria(9);Neisseriales(9);Neisseriaceae(9);Neisseria(9)	prophage(1),extrachromosomal(8)	linear (9)	VirSorter(9)	33
Cluster_188	9	2	hallmark(2),NCBI_RefSeq(7),refseq(1)	Viruses(9);dsDNA viruses no RNA stage(9);Caudovirales(9);Podoviridae(9);N4likevirus(9);unknown(2)	Bacteria(9);Proteobacteria(9);Gammaproteobacteria(9);Vibrionales(1),Oceanospirillales(1),Pseudomonadales(3),Enterobacteriales(4);Vibrionaceae(1),unknown(1),Moraxellaceae(1),Pseudomonadaceae(2),Enterobacteriaceae(4);SUP05(1),Moraxella(1),Vibrio(1),Pseudomonas(2),Escherichia(4)	complete(7),extrachromosomal(2)	linear (2)	RefSeq(7),VirSorter(2)	117
Cluster_189	9	9	phage(9)	Viruses(9);dsDNA viruses no RNA stage(9);Caudovirales(9);Myoviridae(9);unknown(9);unknown(9)	Bacteria(9);Proteobacteria(9);Gammaproteobacteria(9);Pseudomonadales(9);Moraxellaceae(9);Acinetobacter(9)	extrachromosomal(9)	linear (9)	VirSorter(9)	24
Cluster_184	9	8	hallmark(8),NCBI_RefSeq(1),refseq(6)	Viruses(9);dsDNA viruses no RNA stage(9);Caudovirales(9);unclassified(1),Siphoviridae(7);unclassified(1),Lambdalikevirus(1),unknown(6);unclassified(1),unknown(7)	Bacteria(9);Proteobacteria(9);Gammaproteobacteria(9);Xanthomonadales(9);Xanthomonadaceae(9);Xylella(2),Xanthomonas(7)	complete(1),extrachromosomal(8)	linear (8)	RefSeq(1),VirSorter(8)	39
Cluster_178	9	9	hallmark(8),phage(9)	Viruses(9);dsDNA viruses no RNA stage(9);Caudovirales(9);Siphoviridae(9);unknown(9);unknown(9)	Bacteria(9);Firmicutes(9);Bacilli(9);Lactobacillales(9);Enterococcaceae(9);Enterococcus(9)	prophage(9)	linear (9)	VirSorter(9)	65
Cluster_185	9	7	hallmark(7),NCBI_RefSeq(2),refseq(7)	Viruses(9);dsDNA viruses no RNA stage(9);Caudovirales(9);Siphoviridae(9);Lambdalikevirus(7);unknown(7)	Bacteria(9);Firmicutes(9);Bacilli(9);Bacillales(9);Listeriaceae(9);Listeria(9)	prophage(5),complete(2),extrachromosomal(2)	linear (7)	RefSeq(2),VirSorter(7)	73
Cluster_203	8	8	hallmark(7),vdb(2),phage(3)	Viruses(8);dsDNA viruses no RNA stage(8);Caudovirales(8);Podoviridae(1),unclassified(2),Siphoviridae(2),Myoviridae(3);(1),P22likevirus(1),Lambdalikevirus(1),unclassified(5);unclassified(2),unknown(6)	Bacteria(8);Proteobacteria(8);Betaproteobacteria(1),Alphaproteobacteria(7);Burkholderiales(1),Rhizobiales(7);Rhizobiaceae(1),Burkholderiaceae(1),Bartonellaceae(6);Candidatus Glomeribacter(1),Agrobacterium(1),Bartonella(6)	prophage(2),extrachromosomal(6)	circular (1) linear (7)	VirSorter(8)	71
Cluster_198	8	7	hallmark(2),NCBI_RefSeq(1),noncaudo(6),refseq(1)	Viruses(8);ssDNA viruses(8);(1),unknown(7);Inoviridae(8);Inovirus(8);unknown(7)	Bacteria(8);Proteobacteria(8);Gammaproteobacteria(8);Aeromonadales(2),Vibrionales(3),Enterobacteriales(3);Aeromonadaceae(2),Enterobacteriaceae(3),Vibrionaceae(3);Escherichia(1),Citrobacter(1),Klebsiella(1),Aeromonas(2),Vibrio(3)	prophage(2),complete(1),extrachromosomal(5)	circular (2) linear (5)	RefSeq(1),VirSorter(7)	25
Cluster_210	8	8	hallmark(8),phage(3)	Viruses(8);dsDNA viruses no RNA stage(8);Caudovirales(8);Myoviridae(1),unclassified(2),Siphoviridae(5);unknown(1),T4likevirus(1),Tunalikevirus(2),unclassified(4);unclassified(1),unknown(7)	Bacteria(8);Proteobacteria(8);Betaproteobacteria(1),Gammaproteobacteria(7);Burkholderiales(1),Pseudomonadales(7);Burkholderiaceae(1),Moraxellaceae(7);Ralstonia(1),Acinetobacter(7)	prophage(1),extrachromosomal(7)	linear (8)	VirSorter(8)	72
Cluster_215	8	8	noncaudo(6),phage(2)	Viruses(8);unclassified(1),ssDNA viruses(1),dsDNA viruses no RNA stage(6);unknown(1),unclassified(1),Caudovirales(6);unclassified(1),Inoviridae(1),Siphoviridae(2),Myoviridae(4);Inovirus(1),unclassified(1),Lambdalikevirus(2),Hpunalikevirus(4);unknown(8)	Bacteria(8);Proteobacteria(8);Gammaproteobacteria(8);Vibrionales(8);Vibrionaceae(8);Vibrio(8)	prophage(7),extrachromosomal(1)	linear (8)	VirSorter(8)	24
Cluster_206	8	8	hallmark(8),vdb(1),phage(8)	Viruses(8);dsDNA viruses no RNA stage(8);Caudovirales(8);unclassified(2),Siphoviridae(6);unknown(4),unclassified(4);unknown(8)	Bacteria(8);Firmicutes(8);Bacilli(8);Lactobacillales(8);Lactobacillaceae(8);Lactobacillus(8)	prophage(4),extrachromosomal(4)	linear (8)	VirSorter(8)	87
Cluster_201	8	8	hallmark(8)	Viruses(8);dsDNA viruses no RNA stage(8);Caudovirales(8);Siphoviridae(8);unknown(2),Lambdalikevirus(6);unknown(8)	Bacteria(8);Proteobacteria(8);Alphaproteobacteria(8);Rhizobiales(8);Brucellaceae(1),Phyllobacteriaceae(1),Rhizobiaceae(6);Nitratireductor(1),Pseudochrobactrum(1),Sinorhizobium(6)	extrachromosomal(8)	linear (8)	VirSorter(8)	76
Cluster_212	8	1	hallmark(1),NCBI_RefSeq(7),refseq(1)	Viruses(8);dsDNA viruses no RNA stage(8);Caudovirales(8);Siphoviridae(8);unclassified(1);unknown(1)	Bacteria(8);Actinobacteria(8);Actinobacteria(8);Actinomycetales(8);Mycobacteriaceae(8);unknown(1),Mycobacterium(7)	complete(7),extrachromosomal(1)	linear (1)	RefSeq(7),VirSorter(1)	69
Cluster_209	8	1	hallmark(1),NCBI_RefSeq(7),refseq(1)	Viruses(8);dsDNA viruses no RNA stage(8);Caudovirales(8);Siphoviridae(8);unknown(1);unknown(1)	Bacteria(8);Actinobacteria(8);Actinobacteria(8);Actinomycetales(8);Mycobacteriaceae(8);unknown(2),Mycobacterium(6)	complete(7),extrachromosomal(1)	linear (1)	RefSeq(7),VirSorter(1)	16
Cluster_193	8	8	hallmark(8),phage(3)	Viruses(8);dsDNA viruses no RNA stage(8);Caudovirales(8);unclassified(2),Siphoviridae(6);unclassified(2),Lambdalikevirus(6);unknown(8)	Bacteria(8);Firmicutes(8);Clostridia(8);Clostridiales(8);Peptostreptococcaceae(8);unknown(8)	extrachromosomal(8)	linear (8)	VirSorter(8)	41
Cluster_208	8	8	hallmark(1),vdb(2),phage(8)	Viruses(8);dsDNA viruses no RNA stage(8);Caudovirales(8);unclassified(1),Myoviridae(1),Siphoviridae(6);unknown(1),unclassified(2),Spbetalikevirus(5);unclassified(1),unknown(7)	Bacteria(8);Firmicutes(8);Clostridia(8);Clostridiales(8);Peptostreptococcaceae(8);Peptostreptococcus(2),unknown(6)	extrachromosomal(8)	linear (8)	VirSorter(8)	74
Cluster_204	8	1	NCBI_RefSeq(7),refseq(1)	Viruses(8);dsDNA viruses no RNA stage(8);Caudovirales(8);Myoviridae(1),Siphoviridae(7);unclassified(1),T5likevirus(4);unclassified(1)	Bacteria(8);Proteobacteria(8);Gammaproteobacteria(8);Vibrionales(1),Oceanospirillales(1),Enterobacteriales(6);Vibrionaceae(1),unknown(1),Enterobacteriaceae(6);Yersinia(1),SUP05(1),unknown(1),Vibrio(1),Pectobacterium(1),Escherichia(3)	complete(7),extrachromosomal(1)	linear (1)	RefSeq(7),VirSorter(1)	32
Cluster_195	8	8	hallmark(6),phage(8)	Viruses(8);dsDNA viruses no RNA stage(8);Caudovirales(8);Siphoviridae(8);unknown(8);unknown(8)	Bacteria(8);Firmicutes(8);Bacilli(8);Lactobacillales(8);Streptococcaceae(8);Lactococcus(8)	prophage(5),extrachromosomal(3)	linear (8)	VirSorter(8)	73
Cluster_207	8	8	hallmark(8),vdb(4),phage(4)	Viruses(8);dsDNA viruses no RNA stage(8);Caudovirales(8);unclassified(1),Siphoviridae(7);unclassified(1),L5likevirus(1),unknown(6);unknown(8)	Bacteria(8);Actinobacteria(8);Actinobacteria(8);Actinomycetales(2),Bifidobacteriales(6);Actinomycetaceae(1),Propionibacteriaceae(1),Bifidobacteriaceae(6);Actinomyces(1),Propionibacterium(1),Bifidobacterium(6)	prophage(4),extrachromosomal(4)	linear (8)	VirSorter(8)	59
Cluster_214	8	8	hallmark(8),phage(8)	Viruses(8);dsDNA viruses no RNA stage(8);Caudovirales(8);Siphoviridae(8);unclassified(1),unknown(7);unknown(8)	Bacteria(8);Actinobacteria(8);Actinobacteria(8);Actinomycetales(8);Micromonosporaceae(8);Salinispora(8)	prophage(1),extrachromosomal(7)	linear (8)	VirSorter(8)	53
Cluster_202	8	8	hallmark(6),vdb(2),phage(5)	Viruses(8);dsDNA viruses no RNA stage(8);Caudovirales(8);Myoviridae(1),Siphoviridae(2),unclassified(5);unknown(1),unclassified(7);unclassified(2),unknown(6)	Bacteria(8);Proteobacteria(8);Gammaproteobacteria(8);Xanthomonadales(8);Xanthomonadaceae(8);Xylella(8)	prophage(2),extrachromosomal(6)	linear (8)	VirSorter(8)	73
Cluster_211	8	6	hallmark(1),NCBI_RefSeq(2),refseq(6)	Viruses(8);dsDNA viruses no RNA stage(8);Caudovirales(8);Myoviridae(1),Siphoviridae(7);Twortlikevirus(1),unclassified(1),Spbetalikevirus(4);unknown(6)	Bacteria(8);Firmicutes(8);Bacilli(8);Lactobacillales(1),Bacillales(7);Streptococcaceae(1),Bacillaceae(1),Paenibacillaceae(1),Staphylococcaceae(5);Paenibacillus(1),Bacillus(1),Lactococcus(1),Staphylococcus(5)	complete(2),extrachromosomal(6)	linear (6)	RefSeq(2),VirSorter(6)	73
Cluster_199	8	6	hallmark(4),vdb(1),NCBI_RefSeq(2),refseq(6)	Viruses(8);dsDNA viruses no RNA stage(8);Caudovirales(8);Siphoviridae(8);unclassified(2),unknown(4);unknown(6)	Bacteria(8);Firmicutes(8);Bacilli(8);Lactobacillales(8);Streptococcaceae(8);Lactococcus(8)	prophage(1),complete(2),extrachromosomal(5)	linear (6)	RefSeq(2),VirSorter(6)	99
Cluster_213	8	8	hallmark(8)	Viruses(8);dsDNA viruses no RNA stage(8);Caudovirales(8);Siphoviridae(1),unclassified(7);unknown(1),Lambdalikevirus(1),unclassified(6);unknown(2),unclassified(6)	Bacteria(8);Spirochaetes(8);Spirochaetia(8);Spirochaetales(8);Leptospiraceae(8);Leptospira(8)	extrachromosomal(8)	linear (8)	VirSorter(8)	56
Cluster_200	8	7	hallmark(7),vdb(1),NCBI_RefSeq(1),refseq(7)	Viruses(8);dsDNA viruses no RNA stage(8);Caudovirales(8);unclassified(1),Siphoviridae(7);unclassified(2),unknown(5);unknown(7)	Bacteria(8);Firmicutes(8);Erysipelotrichia(2),Clostridia(6);Erysipelotrichales(2),Clostridiales(6);Peptostreptococcaceae(1),Erysipelotrichaceae(2),Clostridiaceae(5);unknown(3),Clostridium(5)	prophage(4),complete(1),extrachromosomal(3)	linear (7)	RefSeq(1),VirSorter(7)	51
Cluster_196	8	7	hallmark(6),NCBI_RefSeq(1),refseq(7)	Viruses(8);unclassified(1),unclassified phages(1),dsDNA viruses no RNA stage(6);unclassified(1),Caudovirales(6);unclassified(1),Siphoviridae(6);unknown(1),unclassified(6);unknown(7)	Bacteria(8);Firmicutes(8);Bacilli(8);Lactobacillales(8);Streptococcaceae(8);Streptococcus(8)	prophage(6),complete(1),extrachromosomal(1)	linear (7)	RefSeq(1),VirSorter(7)	60
Cluster_205	8	2	hallmark(1),NCBI_RefSeq(6),refseq(2)	Viruses(8);dsDNA viruses no RNA stage(8);Caudovirales(8);Podoviridae(7);(2);unknown(2)	Bacteria(8);Proteobacteria(8);Gammaproteobacteria(1),Alphaproteobacteria(2),Betaproteobacteria(5);Enterobacteriales(1),Rhizobiales(2),Burkholderiales(5);Enterobacteriaceae(1),Rhizobiaceae(1),Phyllobacteriaceae(1),Comamonadaceae(1),Burkholderiaceae(4);Sinorhizobium(1),Mesorhizobium(1),Erwinia(1),Acidovorax(1),Burkholderia(4)	prophage(1),complete(6),extrachromosomal(1)	linear (2)	RefSeq(6),VirSorter(2)	62
Cluster_216	8	6	hallmark(5),NCBI_RefSeq(2),noncaudo(4),refseq(2)	Viruses(8);ssDNA viruses(8);(2),unknown(6);Inoviridae(8);Inovirus(8);unknown(6)	Bacteria(8);Proteobacteria(8);Betaproteobacteria(8);Burkholderiales(8);Burkholderiaceae(8);Cupriavidus(1),Ralstonia(7)	prophppppge(6),complete(2)	linear (6)	RefSeq(2),VirSorter(6)	17
Cluster_197	8	8	hallmark(8),vdb(2),phage(8)	Viruses(8);dsDNA viruses no RNA stage(8);Caudovirales(8);unclassified(1),Siphoviridae(7);unknown(3),unclassified(5);unclassified(1),unknown(7)	Bacteria(8);Actinobacteria(1),Firmicutes(7);Actinobacteria(1),Clostridia(3),Bacilli(4);Coriobacteriales(1),Clostridiales(3),Lactobacillales(4);Coriobacteriaceae(1),Clostridiaceae(1),Lachnospiraceae(2),Streptococcaceae(4);Clostridium(1),unknown(1),Blautia(1),Olsenella(1),Streptococcus(4)	prophage(3),extrachromosomal(5)	linear (8)	VirSorter(8)	69
Cluster_194	8	8	phage(8)	Viruses(8);dsDNA viruses no RNA stage(8);Caudovirales(8);Siphoviridae(2),unclassified(6);Spbetalikevirus(2),unclassified(6);unknown(8)	Bacteria(8);Firmicutes(8);Bacilli(8);Bacillales(8);Staphylococcaceae(8);Staphylococcus(8)	extrachromosomal(8)	linear (8)	VirSorter(8)	61
Cluster_231	7	7	hallmark(1),vdb(2),noncaudo(7)	Viruses(7);ssDNA viruses(7);unknown(7);Inoviridae(7);Inovirus(7);unknown(7)	Bacteria(7);Proteobacteria(7);Gammaproteobacteria(7);Vibrionales(1),Pseudomonadales(1),Aeromonadales(2),Enterobacteriales(3);Vibrionaceae(1),Moraxellaceae(1),Aeromonadaceae(2),Enterobacteriaceae(3);Vibrio(1),Acinetobacter(1),Aeromonas(2),Escherichia(3)	prophage(2),extrachromosomal(5)	circular (1) linear (6)	VirSorter(7)	14
Cluster_221	7	0	NCBI_RefSeq(7)	Viruses(7);dsDNA viruses no RNA stage(7);Caudovirales(7);Siphoviridae(7)	Bacteria(7);Firmicutes(7);Bacilli(7);Lactobacillales(7);Streptococcaceae(7);Streptococcus(7)	complete(7)	-	RefSeq(7)
Cluster_240	7	6	hallmark(5),NCBI_RefSeq(1),refseq(3)	Viruses(7);dsDNA viruses no RNA stage(7);Caudovirales(7);Siphoviridae(7);Phic3unalikevirus(1),unknown(2),unclassified(3);unclassified(1),unknown(5)	Bacteria(7);Actinobacteria(7);Actinobacteria(7);Actinomycetales(7);Micromonosporaceae(1),Frankiaceae(1),Streptomycetaceae(5);Frankia(1),Salinispora(1),Streptomyces(5)	prophage(1),complete(1),extrachromosomal(5)	linear (6)	RefSeq(1),VirSorter(6)	113
Cluster_234	7	6	hallmark(5),vdb(1),NCBI_RefSeq(1),refseq(6)	Viruses(7);unclassified phages(1),dsDNA viruses no RNA stage(6);Caudovirales(6);Siphoviridae(6);unclassified(1),unknown(5);unclassified(1),unknown(5)	Bacteria(7);Firmicutes(7);Bacilli(7);Bacillales(7);Staphylococcaceae(1),Bacillaceae(6);Staphylococcus(1),Bacillus(6)	prophage(2),complete(1),extrachromosomal(4)	linear (6)	RefSeq(1),VirSorter(6)	81
Cluster_220	7	7	hallmark(4),vdb(4),phage(6)	Viruses(7);unclassified(1),dsDNA viruses no RNA stage(6);unclassified(1),Caudovirales(6);unclassified(2),Siphoviridae(5);unknown(2),unclassified(5);unclassified(3),unknown(4)	Bacteria(7);Actinobacteria(1),Firmicutes(6);Actinobacteria(1),Clostridia(3),Bacilli(3);Actinomycetales(1),Bacillales(1),Lactobacillales(2),Clostridiales(3);Lachnospiraceae(1),Corynebacteriaceae(1),Clostridiales Family XIII. Incertae Sedis(1),Bacillaceae(1),Clostridiaceae(1),Streptococcaceae(2);Clostridium(1),Mogibacterium(1),Corynebacterium(1),unknown(1),Lysinibacillus(1),Streptococcus(2)	prophage(2),extrachromosomal(5)	linear (7)	VirSorter(7)	95
Cluster_245	7	0	NCBI_RefSeq(7)	Viruses(7);dsDNA viruses no RNA stage(7);(7);Lipothrixviridae(7);Deltalipothrixvirus(1),Betalipothrixvirus(6)	Archaea(7);Crenarchaeota(7);Thermoprotei(7);Sulfolobales(7);Sulfolobaceae(7);unknown(1),Sulfolobus(1),Acidianus(5)	complete(7)	-	RefSeq(7)
Cluster_246	7	7	vdb(7),phage(7)	Bacteria(7);Bacteroidetes(7);Bacteroidia(7);Bacteroidales(7);Bacteroidaceae(7);Bacteroides(7)	phage(7)	(7)	circular (7)	8
Cluster_223	7	7	hallmark(1),phage(7)	Viruses(7);dsDNA viruses no RNA stage(7);Caudovirales(7);Siphoviridae(7);unknown(7);unknown(7)	Bacteria(7);Firmicutes(7);Bacilli(7);Bacillales(7);Staphylococcaceae(7);Staphylococcus(7)	prophage(1),extrachromosomal(6)	linear (7)	VirSorter(7)	98
Cluster_230	7	6	vdb(1),NCBI_RefSeq(1),refseq(6)	Viruses(7);dsDNA viruses no RNA stage(7);Caudovirales(7);Myoviridae(1),unclassified(6);unclassified(6);unclassified(6)	Bacteria(7);Proteobacteria(7);Gammaproteobacteria(7);Enterobacteriales(7);Enterobacteriaceae(7);Yersinia(1),Salmonella(2),Escherichia(4)	prophage(1),complete(1),extrachromosomal(5)	linear (6)	RefSeq(1),VirSorter(6)	16
Cluster_217	7	7	hallmark(6),phage(7)	Viruses(7);dsDNA viruses no RNA stage(7);Caudovirales(7);Siphoviridae(3),unclassified(4);(1),unknown(3),unclassified(3);unclassified(2),unknown(5)	Bacteria(7);Proteobacteria(7);Gammaproteobacteria(7);Pseudomonadales(7);Pseudomonadaceae(7);Pseudomonas(7)	prophage(2),extrachromosomal(5)	circular (1) linear (6)	VirSorter(7)	72
Cluster_226	7	6	hallmark(5),vdb(5),NCBI_RefSeq(1),refseq(5)	Viruses(7);dsDNA viruses no RNA stage(7);Caudovirales(7);Siphoviridae(7);Lambdalikevirus(1),unknown(5);unknown(6)	Bacteria(7);Firmicutes(7);Bacilli(1),Clostridia(6);Lactobacillales(1),Clostridiales(6);Streptococcaceae(1),Lachnospiraceae(1),Ruminococcaceae(2),Clostridiaceae(3);Blautia(1),Lactococcus(1),Subdoligranulum(1),Ruminococcus(1),Clostridium(3)	prophage(4),complete(1),extrachromosomal(2)	linear (6)	RefSeq(1),VirSorter(6)	100
Cluster_236	7	7	hallmark(7),vdb(4),phage(4)	Viruses(7);dsDNA viruses no RNA stage(7);Caudovirales(7);Siphoviridae(7);Lambdalikevirus(7);unknown(7)	Bacteria(7);Firmicutes(7);Clostridia(7);Clostridiales(7);Ruminococcaceae(1),Lachnospiraceae(1),Peptococcaceae(1),Clostridiaceae(2),Eubacteriaceae(2);Desulfosporosinus(1),unknown(1),Blautia(1),Clostridium(2),Eubacterium(2)	prophage(5),extrachromosomal(2)	linear (7)	VirSorter(7)	90
Cluster_241	7	7	hallmark(7),phage(5)	Viruses(7);unclassified(1),dsDNA viruses no RNA stage(6);unclassified(1),Caudovirales(6);Siphoviridae(3),unclassified(4);unclassified(3),unknown(4);unknown(7)	Bacteria(7);Firmicutes(7);Bacilli(7);Bacillales(7);Bacillaceae(7);Bacillus(7)	prophage(3),extrachromosomal(4)	linear (7)	VirSorter(7)	58
Cluster_225	7	7	hallmark(1),phage(7)	Viruses(7);dsDNA viruses no RNA stage(7);Caudovirales(7);Siphoviridae(3),unclassified(4);(1),unclassified(3),Lambdalikevirus(3);unknown(3),unclassified(4)	Bacteria(7);Proteobacteria(7);Gammaproteobacteria(7);Enterobacteriales(7);Enterobacteriaceae(7);Salmonella(7)	prophage(1),extrachromosomal(6)	linear (7)	VirSorter(7)	34
Cluster_219	7	7	hallmark(6),vdb(1),phage(7)	Viruses(7);dsDNA viruses no RNA stage(7);Caudovirales(7);Myoviridae(2),unclassified(5);unknown(2),unclassified(5);unknown(7)	Bacteria(7);Firmicutes(7);Clostridia(7);Clostridiales(7);Peptostreptococcaceae(7);unknown(7)	prophage(1),extrachromosomal(6)	linear (7)	VirSorter(7)	97
Cluster_233	7	6	hallmark(6),vdb(1),NCBI_RefSeq(1),refseq(6)	Viruses(7);dsDNA viruses no RNA stage(7);Caudovirales(7);Podoviridae(7);(1),unclassified(1),P22likevirus(1),unknown(3);unknown(6)	Bacteria(7);Proteobacteria(7);Betaproteobacteria(3),Gammaproteobacteria(4);Burkholderiales(3),Pseudomonadales(4);Comamonadaceae(3),Pseudomonadaceae(4);Acidovorax(1),Delftia(2),Pseudomonas(4)	prophage(2),complete(1),extrachromosomal(4)	linear (6)	RefSeq(1),VirSorter(6)	92
Cluster_237	7	7	hallmark(4),phage(6)	Viruses(7);dsDNA viruses no RNA stage(7);Caudovirales(7);Siphoviridae(3),unclassified(4);Lambdalikevirus(3),unclassified(4);unclassified(3),unknown(4)	Bacteria(7);Proteobacteria(7);Gammaproteobacteria(7);Pseudomonadales(7);Moraxellaceae(7);Acinetobacter(7)	extrachromosomal(7)	linear (7)	VirSorter(7)	42
Cluster_222	7	7	hallmark(7),phage(7)	Viruses(7);dsDNA viruses no RNA stage(7);Caudovirales(7);Myoviridae(3),Siphoviridae(4);unknown(2),Lambdalikevirus(2),Punalikevirus(3);unknown(7)	Bacteria(7);Firmicutes(7);Bacilli(7);Lactobacillales(7);Enterococcaceae(7);Enterococcus(7)	prophage(1),extrachromosomal(6)	linear (7)	VirSorter(7)	35
Cluster_238	7	0	NCBI_RefSeq(7)	Viruses(7);dsDNA viruses no RNA stage(7);Caudovirales(5);Podoviridae(4)	Bacteria(7);Cyanobacteria(7);Prochlorales(1),unknown(6);Prochlorococcaceae(1),Prochlorales(2),Chroococcales(4);Prochlorococcaceae(2),unknown(4);Prochlorococcus(2),Synechococcus(4)	complete(7)	-	RefSeq(7)
Cluster_228	7	6	vdb(1),NCBI_RefSeq(1),noncaudo(6)	Viruses(7);ssDNA viruses(7);(1),unknown(6);Inoviridae(7);Inovirus(7);unknown(6)	Bacteria(7);Proteobacteria(7);Betaproteobacteria(1),Gammaproteobacteria(6);Alteromonadales(1),Rhodocyclales(1),Pseudomonadales(2),Vibrionales(3);Rhodocyclaceae(1),Shewanellaceae(1),Pseudomonadaceae(2),Vibrionaceae(3);Photobacterium(1),Thauera(1),Shewanella(1),Pseudomonas(2),Vibrio(2)	prophage(2),complete(1),extrachromosomal(4)	linear (6)	RefSeq(1),VirSorter(6)	21
Cluster_232	7	7	hallmark(7),noncaudo(7)	Viruses(7);ssDNA viruses(7);unknown(7);Inoviridae(7);Inovirus(7);unknown(7)	Bacteria(7);Proteobacteria(7);Gammaproteobacteria(7);Pseudomonadales(7);Moraxellaceae(7);Acinetobacter(7)	extrachromosomal(7)	circular (1) linear (6)	VirSorter(7)	11
Cluster_242	7	6	hallmark(6),NCBI_RefSeq(1),noncaudo(1),refseq(5)	Viruses(7);ssDNA viruses(7);(1),unknown(6);Inoviridae(7);Inovirus(7);unknown(6)	Bacteria(7);Proteobacteria(7);Gammaproteobacteria(7);Vibrionales(7);Vibrionaceae(7);Vibrio(7)	prophage(2),complete(1),extrachromosomal(4)	linear (6)	RefSeq(1),VirSorter(6)	25
Cluster_239	7	6	NCBI_RefSeq(1),refseq(6)	Viruses(7);dsDNA viruses no RNA stage(7);Caudovirales(7);Siphoviridae(1),Podoviridae(6);unknown(6);unknown(6)	Bacteria(7);Proteobacteria(7);Epsilonproteobacteria(7);Campylobacterales(7);Helicobacteraceae(7);Helicobacter(7)	prophage(1),complete(1),extrachromosomal(5)	linear (6)	RefSeq(1),VirSorter(6)	13
Cluster_227	7	7	hallmark(6),vdb(3),phage(3)	Viruses(7);dsDNA viruses no RNA stage(7);Caudovirales(7);Siphoviridae(7);Phic3unalikevirus(1),unclassified(1),Lambdalikevirus(1),Spbetalikevirus(1),unknown(3);unknown(7)	Bacteria(7);Firmicutes(7);unknown(1),Clostridia(6);unknown(1),Clostridiales(6);Ruminococcaceae(1),unknown(1),Lachnospiraceae(5);Dorea(1),Roseburia(1),Ruminococcus(1),unknown(4)	prophage(3),extrachromosomal(4)	linear (7)	VirSorter(7)	67
Cluster_224	7	7	phage(7)	Viruses(7);dsDNA viruses no RNA stage(1),unclassified phages(1),unclassified(5);Caudovirales(1),unknown(1),unclassified(5);unknown(1),Siphoviridae(1),unclassified(5);unknown(1),Lambdalikevirus(1),unclassified(5);unknown(7)	Bacteria(7);Proteobacteria(7);Gammaproteobacteria(7);Enterobacteriales(7);Enterobacteriaceae(7);Salmonella(7)	extrachromosomal(7)	linear (7)	VirSorter(7)	34
Cluster_229	7	3	hallmark(3),NCBI_RefSeq(4),noncaudo(1),refseq(2)	Viruses(7);ssDNA viruses(7);unknown(3),(4);Inoviridae(7);Inovirus(7);unknown(3)	Bacteria(7);Proteobacteria(7);Betaproteobacteria(7);Burkholderiales(7);Burkholderiaceae(7);Cupriavidus(2),Ralstonia(5)	prophage(2),complete(4),extrachromosomal(1)	linear (3)	RefSeq(4),VirSorter(3)	13
Cluster_244	7	7	hallmark(7),vdb(3)	Viruses(7);dsDNA viruses no RNA stage(7);Caudovirales(7);unclassified(2),Siphoviridae(5);(1),unclassified(1),Yualikevirus(5);unclassified(1),unknown(6)	Bacteria(7);Firmicutes(7);Clostridia(7);Clostridiales(7);Clostridiaceae(3),Eubacteriaceae(4);Clostridium(3),Eubacterium(4)	prophage(3),extrachromosomal(4)	linear (7)	VirSorter(7)	40
Cluster_243	7	7	hallmark(7),vdb(1),phage(6)	Viruses(7);dsDNA viruses no RNA stage(7);Caudovirales(7);unclassified(3),Siphoviridae(4);unclassified(1),unknown(6);unknown(7)	Bacteria(7);Firmicutes(7);unknown(1),Clostridia(6);unknown(1),Clostridiales(6);Ruminococcaceae(1),Lachnospiraceae(1),Eubacteriaceae(1),unknown(2),Clostridiaceae(2);Eubacterium(1),Blautia(1),Ruminococcus(1),Clostridium(2),unknown(2)	prophage(1),extrachromosomal(6)	linear (7)	VirSorter(7)	56
Cluster_235	7	2	hallmark(2),NCBI_RefSeq(5),refseq(2)	Viruses(7);dsDNA viruses no RNA stage(7);Caudovirales(7);Siphoviridae(7);unknown(1),unclassified(1);unknown(2)	Bacteria(7);Actinobacteria(7);Actinobacteria(7);Actinomycetales(7);Nocardiaceae(2),Mycobacteriaceae(5);Rhodococcus(2),Mycobacterium(2),unknown(3)	complete(5),extrachromosomal(2)	linear (2)	RefSeq(5),VirSorter(2)	45
Cluster_218	7	6	hallmark(5),NCBI_RefSeq(1),refseq(6)	Viruses(7);dsDNA viruses no RNA stage(7);Caudovirales(7);unclassified(1),Siphoviridae(6);unknown(1),unclassified(2),Lambdalikevirus(3);unknown(6)	Bacteria(7);Proteobacteria(7);Alphaproteobacteria(7);Rhodobacterales(1),Rhizobiales(6);Brucellaceae(1),Aurantimonadaceae(1),Rhodobacteraceae(1),Rhizobiaceae(2),Phyllobacteriaceae(2);Nitratireductor(1),Aureimonas(1),Ochrobactrum(1),Mesorhizobium(1),Paracoccus(1),Rhizobium/Agrobacterium group(1),Agrobacterium(1)	prophage(1),complete(1),extrachromosomal(5)	circular (1) linear (5)	RefSeq(1),VirSorter(6)	90
Cluster_285	6	6	hallmark(6)	Viruses(6);dsDNA viruses no RNA stage(6);Caudovirales(6);Myoviridae(6);unknown(6);unknown(6)	Bacteria(6);Proteobacteria(6);Gammaproteobacteria(6);Vibrionales(6);Vibrionaceae(6);Vibrio(6)	extrachromosomal(6)	linear (6)	VirSorter(6)	20
Cluster_253	6	5	NCBI_RefSeq(1),refseq(5)	Viruses(6);dsDNA viruses no RNA stage(6);Caudovirales(6);unclassified(1),Siphoviridae(5);unclassified(3),Spbetalikevirus(3);unclassified(2),unknown(3)	Bacteria(6);Firmicutes(6);Bacilli(6);Bacillales(6);Bacillaceae(6);Bacillus(6)	prophage(1),complete(1),extrachromosomal(4)	linear (5)	RefSeq(1),VirSorter(5)	113
Cluster_274	6	0	NCBI_RefSeq(6)	Viruses(6);dsDNA viruses no RNA stage(6);Caudovirales(6);Podoviridae(6)	Bacteria(6);Proteobacteria(6);Gammaproteobacteria(6);Enterobacteriales(6);Enterobacteriaceae(6);Salmonella(1),unknown(1),Pectobacterium(1),Escherichia(3)	complete(6)	-	RefSeq(6)
Cluster_252	6	6	phage(6)	Viruses(6);dsDNA viruses no RNA stage(6);Caudovirales(6);Siphoviridae(6);unclassified(6);unclassified(6)	Bacteria(6);Proteobacteria(6);Gammaproteobacteria(6);Enterobacteriales(6);Enterobacteriaceae(6);Salmonella(1),Escherichia(5)	extrachromosomal(6)	linear (6)	VirSorter(6)	35
Cluster_255	6	6	hallmark(3),vdb(3),phage(3)	Viruses(6);dsDNA viruses no RNA stage(6);Caudovirales(6);Myoviridae(1),Siphoviridae(5);unclassified(1),unknown(5);unclassified(1),unknown(5)	Bacteria(6);Firmicutes(6);unknown(1),Clostridia(5);unknown(1),Clostridiales(5);unknown(1),Clostridiaceae(1),Lachnospiraceae(4);Clostridium(1),unknown(1),Roseburia(1),Blautia(3)	prophage(1),extrachromosomal(5)	linear (6)	VirSorter(6)	88
Cluster_275	6	6	phage(6)	Viruses(6);dsDNA viruses no RNA stage(6);Caudovirales(6);Siphoviridae(6);unknown(1),Lambdalikevirus(1),unclassified(4);unknown(6)	Bacteria(6);Proteobacteria(6);Gammaproteobacteria(6);Pseudomonadales(6);Moraxellaceae(6);Acinetobacter(6)	extrachromosomal(6)	linear (6)	VirSorter(6)	12
Cluster_281	6	0	NCBI_RefSeq(6)	Viruses(6);dsDNA viruses no RNA stage(6);Caudovirales(6);Myoviridae(6)	Bacteria(6);Proteobacteria(6);Gammaproteobacteria(6);Pseudomonadales(6);Pseudomonadaceae(6);Pseudomonas(6)	complete(6)	-	RefSeq(6)
Cluster_264	6	6	hallmark(4),phage(6)	Viruses(6);dsDNA viruses no RNA stage(6);Caudovirales(6);unclassified(3),Siphoviridae(3);(1),unclassified(2),Lambdalikevirus(3);unclassified(3),unknown(3)	Bacteria(6);Proteobacteria(6);Gammaproteobacteria(6);Pseudomonadales(6);Pseudomonadaceae(6);Pseudomonas(6)	prophage(1),extrachromosomal(5)	linear (6)	VirSorter(6)	45
Cluster_276	6	3	NCBI_RefSeq(3),noncaudo(1),refseq(2)	Viruses(6);dsDNA viruses no RNA stage(1),ssDNA viruses(5);unknown(3);unknown(3);unknown(3);unknown(3)	Archaea(6);Euryarchaeota(6);Halobacteria(6);Halobacteriales(6);Halobacteriaceae(6);Haloarcula(1),Halorubrum(5)	prophppppge(3),complete(3)	linear (3)	RefSeq(3),VirSorter(3)	22
Cluster_283	6	0	NCBI_RefSeq(6)	Viruses(6);dsDNA viruses no RNA stage(6);Caudovirales(6);Siphoviridae(6)	Bacteria(6);Proteobacteria(6);Alphaproteobacteria(6);Caulobacterales(6);Caulobacteraceae(6);unknown(6)	complete(6)	-	RefSeq(6)
Cluster_271	6	5	hallmark(4),NCBI_RefSeq(1),noncaudo(1),refseq(4)	Viruses(6);unclassified phages(1),ssDNA viruses(5);unknown(5);Inoviridae(5);Inovirus(5);unknown(5)	Bacteria(6);Proteobacteria(6);Gammaproteobacteria(6);Xanthomonadales(6);Xanthomonadaceae(6);Stenotrophomonas(1),Xanthomonas(1),Xylella(4)	prophppppge(5),complete(1)	linear (5)	RefSeq(1),VirSorter(5)	41
Cluster_266	6	6	noncaudo(6)	Viruses(6);unclassified(1),ssDNA viruses(5);unclassified(1),unknown(5);unclassified(1),Inoviridae(5);unclassified(1),Inovirus(5);unknown(6)	Bacteria(6);Proteobacteria(6);Gammaproteobacteria(6);Enterobacteriales(1),Aeromonadales(5);Enterobacteriaceae(1),Aeromonadaceae(5);Proteus(1),Aeromonas(5)	prophage(5),extrachromosomal(1)	linear (6)	VirSorter(6)	14
Cluster_260	6	4	hallmark(3),NCBI_RefSeq(2),refseq(4)	Viruses(6);dsDNA viruses no RNA stage(6);Caudovirales(6);unclassified(1),Podoviridae(5);unknown(4);unknown(4)	Bacteria(6);Proteobacteria(6);Alphaproteobacteria(6);Rhizobiales(6);Rhizobiaceae(6);unknown(2),Candidatus Liberibacter(4)	prophage(1),complete(2),extrachromosomal(3)	linear (4)	RefSeq(2),VirSorter(4)	48
Cluster_254	6	5	NCBI_RefSeq(1),refseq(5)	Viruses(6);dsDNA viruses no RNA stage(6);Caudovirales(1),unknown(1),unclassified(3);unknown(1),Siphoviridae(1),unclassified(3);unknown(5);unknown(5)	Bacteria(6);Firmicutes(6);Bacilli(6);Bacillales(6);Staphylococcaceae(6);Staphylococcus(6)	complete(1),extrachromosomal(5)	linear (5)	RefSeq(1),VirSorter(5)	53
Cluster_277	6	0	NCBI_RefSeq(6)	Viruses(6);dsDNA viruses no RNA stage(6);Caudovirales(6);Podoviridae(6)	Bacteria(6);Proteobacteria(6);Gammaproteobacteria(6);Pseudomonadales(6);Pseudomonadaceae(6);Pseudomonas(6)	complete(6)	-	RefSeq(6)
Cluster_284	6	5	hallmark(4),NCBI_RefSeq(1),refseq(4)	Viruses(6);dsDNA viruses no RNA stage(6);Caudovirales(6);Siphoviridae(1),Myoviridae(5);unknown(5);unknown(5)	Archaea(6);Euryarchaeota(6);Halobacteria(6);Halobacteriales(6);Halobacteriaceae(6);Halococcus(1),Halobacterium(1),Halalkalicoccus(1),Natrialba(3)	prophage(1),complete(1),extrachromosomal(4)	linear (5)	RefSeq(1),VirSorter(5)	92
Cluster_280	6	1	NCBI_RefSeq(5),refseq(1)	Viruses(6);dsDNA viruses no RNA stage(6);Caudovirales(6);unclassified(1),Siphoviridae(5);unclassified(1),Yualikevirus(3);unclassified(1)	Bacteria(6);Bacteroidetes(1),Proteobacteria(5);Flavobacteriia(1),Alphaproteobacteria(2),Gammaproteobacteria(3);Flavobacteriales(1),unknown(1),Rhodobacterales(1),Pseudomonadales(3);Flavobacteriaceae(1),unknown(1),Rhodobacteraceae(1),Pseudomonadaceae(3);Roseobacter(1),unknown(1),Flavobacterium(1),Pseudomonas(3)	complete(5),extrachromosomal(1)	linear (1)	RefSeq(5),VirSorter(1)	20
Cluster_278	6	6	hallmark(6)	Viruses(6);dsDNA viruses no RNA stage(6);Caudovirales(6);Siphoviridae(6);unclassified(1),Lambdalikevirus(5);unknown(6)	Bacteria(6);Proteobacteria(6);Epsilonproteobacteria(6);Campylobacterales(6);Campylobacteraceae(6);Campylobacter(6)	extrachromosomal(6)	circular (1) linear (5)	VirSorter(6)	69
Cluster_267	6	6	phage(6)	Viruses(6);dsDNA viruses no RNA stage(6);Caudovirales(6);Siphoviridae(6);unclassified(3),Lambdalikevirus(3);unknown(6)	Bacteria(6);Proteobacteria(6);Gammaproteobacteria(6);Pseudomonadales(6);Moraxellaceae(6);Acinetobacter(6)	extrachromosomal(6)	linear (6)	VirSorter(6)	20
Cluster_270	6	6	hallmark(2),vdb(1),noncaudo(6)	Viruses(6);dsDNA viruses no RNA stage(2),ssDNA viruses(4);Caudovirales(2),unknown(4);Myoviridae(2),Inoviridae(4);Hpunalikevirus(2),Inovirus(4);unknown(6)	Bacteria(6);Proteobacteria(6);Gammaproteobacteria(6);Enterobacteriales(6);Enterobacteriaceae(6);Escherichia(6)	prophage(2),extrachromosomal(4)	circular (2) linear (4)	VirSorter(6)	10
Cluster_261	6	6	hallmark(1),phage(6)	Viruses(6);dsDNA viruses no RNA stage(6);Caudovirales(6);unclassified(6);(3),unclassified(3);unclassified(6)	Bacteria(6);Proteobacteria(6);Gammaproteobacteria(6);Enterobacteriales(6);Enterobacteriaceae(6);Escherichia(6)	extrachromosomal(6)	linear (6)	VirSorter(6)	29
Cluster_268	6	6	hallmark(6),phage(6)	Viruses(6);dsDNA viruses no RNA stage(6);Caudovirales(6);Siphoviridae(6);unknown(6);unknown(6)	Bacteria(6);Firmicutes(6);Bacilli(6);Bacillales(6);Bacillaceae(6);Bacillus(6)	prophage(1),extrachromosomal(5)	linear (6)	VirSorter(6)	101
Cluster_248	6	6	hallmark(6),phage(5)	Viruses(6);ssDNA viruses(1),dsDNA viruses no RNA stage(5);unknown(1),Caudovirales(5);Inoviridae(1),Siphoviridae(1),unclassified(4);Inovirus(1),Lambdalikevirus(1),unclassified(4);unclassified(1),unknown(5)	Bacteria(6);Proteobacteria(6);Betaproteobacteria(1),Gammaproteobacteria(5);Alteromonadales(1),Burkholderiales(1),Vibrionales(4);Moritellaceae(1),Sutterellaceae(1),Vibrionaceae(4);Sutterella(1),Photobacterium(1),Moritella(1),Vibrio(3)	prophage(4),extrachromosomal(2)	circular (1) linear (5)	VirSorter(6)	69
Cluster_258	6	6	phage(6)	Viruses(6);dsDNA viruses no RNA stage(6);Caudovirales(6);unclassified(1),Myoviridae(5);unclassified(6);unclassified(6)	Bacteria(6);Proteobacteria(6);Gammaproteobacteria(6);Enterobacteriales(6);Enterobacteriaceae(6);Escherichia(6)	extrachromosomal(6)	linear (6)	VirSorter(6)	33
Cluster_282	6	0	NCBI_RefSeq(6)	Viruses(6);dsDNA viruses no RNA stage(6);Caudovirales(6);Podoviridae(6);Ahjdlikevirus(5)	Bacteria(6);Firmicutes(6);Bacilli(6);Lactobacillales(1),Bacillales(5);Streptococcaceae(1),Staphylococcaceae(5);Streptococcus(1),Staphylococcus(5)	complete(6)	-	RefSeq(6)
Cluster_265	6	6	noncaudo(3),phage(3)	Viruses(6);ssDNA viruses(6);unknown(6);Inoviridae(6);Inovirus(6);unknown(6)	Bacteria(6);Proteobacteria(6);Gammaproteobacteria(6);Vibrionales(6);Vibrionaceae(6);Vibrio(6)	prophage(2),extrachromosomal(4)	linear (6)	VirSorter(6)	12
Cluster_257	6	6	hallmark(6),phage(6)	Viruses(6);dsDNA viruses no RNA stage(6);Caudovirales(6);Siphoviridae(6);unclassified(1),unknown(5);unknown(6)	Bacteria(6);Firmicutes(6);Bacilli(6);Bacillales(6);Staphylococcaceae(6);Staphylococcus(6)	prophage(2),extrachromosomal(4)	linear (6)	VirSorter(6)	47
Cluster_250	6	6	hallmark(5),vdb(1),phage(6)	Viruses(6);dsDNA viruses no RNA stage(6);Caudovirales(6);Siphoviridae(3),Myoviridae(3);unknown(1),unclassified(2),Punalikevirus(3);unknown(6)	Bacteria(6);Firmicutes(6);Clostridia(1),Bacilli(5);Clostridiales(1),Lactobacillales(5);Peptostreptococcaceae(1),Enterococcaceae(5);unknown(1),Enterococcus(5)	prophage(3),extrachromosomal(3)	linear (6)	VirSorter(6)	53
Cluster_259	6	6	hallmark(6)	Viruses(6);dsDNA viruses no RNA stage(6);Caudovirales(6);unclassified(1),Myoviridae(1),Siphoviridae(4);(1),unclassified(2),unknown(3);unclassified(1),unknown(5)	Bacteria(6);Proteobacteria(6);Alphaproteobacteria(1),Gammaproteobacteria(5);Rhodospirillales(1),Enterobacteriales(5);Acetobacteraceae(1),Enterobacteriaceae(5);Yersinia(1),Saccharibacter(1),Escherichia(4)	extrachromosomal(6)	linear (6)	VirSorter(6)	54
Cluster_272	6	1	hallmark(1),NCBI_RefSeq(5),refseq(1)	Viruses(6);dsDNA viruses no RNA stage(6);Caudovirales(6);Siphoviridae(6);unclassified(1);unknown(1)	Bacteria(6);Actinobacteria(6);Actinobacteria(6);Actinomycetales(6);Micromonosporaceae(1),Streptomycetaceae(5);Salinispora(1),Streptomyces(5)	prophppppge(1),complete(5)	circular (1)	RefSeq(5),VirSorter(1)	35
Cluster_269	6	6	hallmark(5),phage(5)	Viruses(6);unclassified(3),dsDNA viruses no RNA stage(3);Caudovirales(3),unclassified(3);unclassified(3),Siphoviridae(3);Phic3unalikevirus(1),unknown(1),Lambdalikevirus(1),unclassified(3);unknown(6)	Bacteria(6);Firmicutes(6);Bacilli(6);Bacillales(6);unknown(1),Bacillaceae(5);Exiguobacterium(1),Bacillus(5)	prophage(3),extrachromosomal(3)	linear (6)	VirSorter(6)	54
Cluster_256	6	6	hallmark(6),phage(6)	Viruses(6);dsDNA viruses no RNA stage(6);Caudovirales(6);Siphoviridae(6);Lambdalikevirus(6);unknown(6)	Bacteria(6);Proteobacteria(6);Gammaproteobacteria(6);Pseudomonadales(6);Pseudomonadaceae(6);Pseudomonas(6)	prophage(1),extrachromosomal(5)	linear (6)	VirSorter(6)	43
Cluster_279	6	1	NCBI_RefSeq(5),refseq(1)	Viruses(6);dsDNA viruses no RNA stage(6);Caudovirales(6);Podoviridae(6);unknown(1);unknown(1)	Bacteria(6);Bacteroidetes(6);Flavobacteriia(6);Flavobacteriales(6);Flavobacteriaceae(6);Myroides(1),Cellulophaga(5)	complete(5),extrachromosomal(1)	linear (1)	RefSeq(5),VirSorter(1)	50
Cluster_249	6	6	hallmark(6),vdb(1),phage(1)	Viruses(6);dsDNA viruses no RNA stage(6);Caudovirales(6);unclassified(2),Siphoviridae(4);Lambdalikevirus(1),unclassified(5);unclassified(2),unknown(4)	Bacteria(6);Proteobacteria(6);Betaproteobacteria(1),Gammaproteobacteria(5);Rhodocyclales(1),Aeromonadales(1),Pseudomonadales(4);Rhodocyclaceae(1),Aeromonadaceae(1),Pseudomonadaceae(4);Aeromonas(1),Azoarcus(1),Pseudomonas(4)	prophage(3),extrachromosomal(3)	linear (6)	VirSorter(6)	62
Cluster_251	6	5	hallmark(5),vdb(1),NCBI_RefSeq(1),refseq(4)	Viruses(6);dsDNA viruses no RNA stage(6);Caudovirales(6);unclassified(1),Myoviridae(1),Siphoviridae(4);unknown(2),unclassified(3);unclassified(2),unknown(3)	Bacteria(6);Fusobacteria(1),Firmicutes(5);unknown(1),Fusobacteriia(1),Clostridia(4);Fusobacteriales(1),unknown(1),Clostridiales(4);unknown(1),Fusobacteriaceae(1),Peptostreptococcaceae(2),Clostridiaceae(2);Clostridium(1),Fusobacterium(1),unknown(4)	prophage(2),complete(1),extrachromosomal(3)	circular (1) linear (4)	RefSeq(1),VirSorter(5)	75
Cluster_263	6	5	hallmark(5),NCBI_RefSeq(1),refseq(5)	Viruses(6);dsDNA viruses no RNA stage(6);Caudovirales(6);unclassified(1),Myoviridae(1),Siphoviridae(4);unknown(2),unclassified(3);unclassified(2),unknown(3)	Bacteria(6);Actinobacteria(6);Actinobacteria(6);Actinomycetales(6);Streptomycetaceae(2),Nocardiopsaceae(4);Streptomyces(2),Nocardiopsis(4)	complete(1),extrachromosomal(5)	linear (5)	RefSeq(1),VirSorter(5)	59
Cluster_273	6	1	hallmark(1),NCBI_RefSeq(5),refseq(1)	Viruses(6);unclassified phages(2),dsDNA viruses no RNA stage(4);Caudovirales(4);Podoviridae(4);unclassified(1);unknown(1)	Bacteria(6);Proteobacteria(6);Gammaproteobacteria(3),Betaproteobacteria(3);Enterobacteriales(1),Xanthomonadales(2),Burkholderiales(3);Enterobacteriaceae(1),Xanthomonadaceae(2),Burkholderiaceae(3);unknown(1),Ralstonia(1),Burkholderia(2),Xylella(2)	prophppppge(1),complete(5)	linear (1)	RefSeq(5),VirSorter(1)	46
Cluster_262	6	6	hallmark(5),vdb(1),phage(6)	Viruses(6);dsDNA viruses no RNA stage(6);Caudovirales(6);Podoviridae(6);unclassified(1),(5);unknown(6)	Bacteria(6);Proteobacteria(6);Epsilonproteobacteria(1),Betaproteobacteria(5);Campylobacterales(1),Neisseriales(5);Helicobacteraceae(1),Neisseriaceae(5);Helicobacter(1),Neisseria(5)	prophage(2),extrachromosomal(4)	linear (6)	VirSorter(6)	32
Cluster_247	6	6	hallmark(6),phage(6)	Viruses(6);dsDNA viruses no RNA stage(6);Caudovirales(6);unclassified(3),Siphoviridae(3);unclassified(3),Lambdalikevirus(3);unknown(3),unclassified(3)	Bacteria(6);Proteobacteria(6);Gammaproteobacteria(6);Enterobacteriales(6);Enterobacteriaceae(6);Klebsiella(6)	prophage(4),extrachromosomal(2)	linear (6)	VirSorter(6)	67
Cluster_290	5	3	hallmark(3),NCBI_RefSeq(2),refseq(3)	Viruses(5);dsDNA viruses no RNA stage(5);Caudovirales(5);Siphoviridae(5);unknown(3);unknown(3)	Bacteria(5);Firmicutes(5);Bacilli(5);Bacillales(5);Bacillaceae(5);Bacillus(4)	prophage(2),complete(2),extrachromosomal(1)	linear (3)	RefSeq(2),VirSorter(3)	58
Cluster_309	5	5	hallmark(2),vdb(1),phage(5)	Viruses(5);dsDNA viruses no RNA stage(5);Caudovirales(5);unclassified(1),Podoviridae(1),Myoviridae(3);unclassified(1),unknown(4);unclassified(1),unknown(4)	Bacteria(5);Firmicutes(5);Clostridia(5);Clostridiales(5);Eubacteriaceae(1),Peptostreptococcaceae(4);Eubacterium(1),unknown(4)	extrachromosomal(5)	linear (5)	VirSorter(5)	20
Cluster_313	5	5	hallmark(5)	Viruses(5);dsDNA viruses no RNA stage(5);Caudovirales(5);unclassified(1),Podoviridae(4);unclassified(1),unknown(4);unclassified(1),unknown(4)	Bacteria(5);Proteobacteria(5);Alphaproteobacteria(5);Rhodospirillales(1),Rhizobiales(4);Acetobacteraceae(1),Phyllobacteriaceae(4);Acetobacter(1),Mesorhizobium(4)	extrachromosomal(5)	linear (5)	VirSorter(5)	23
Cluster_286	5	5	hallmark(5),vdb(2),phage(1)	Viruses(5);dsDNA viruses no RNA stage(5);Caudovirales(5);unclassified(1),Siphoviridae(4);Phic3unalikevirus(1),unclassified(1),unknown(3);unclassified(1),unknown(4)	Bacteria(5);Actinobacteria(5);Actinobacteria(5);Actinomycetales(5);Streptomycetaceae(1),Micromonosporaceae(1),Thermomonosporaceae(1),Nocardiopsaceae(2);Actinomadura(1),Streptomyces(1),Salinispora(1),Nocardiopsis(2)	extrachromosomal(5)	circular (1) linear (4)	VirSorter(5)	63
Cluster_318	5	5	hallmark(4),vdb(2),phage(2)	Viruses(5);unclassified(1),dsDNA viruses no RNA stage(4);unclassified(1),Caudovirales(4);unclassified(1),Siphoviridae(4);unclassified(1),Lambdalikevirus(1),unknown(3);unknown(5)	Bacteria(5);Firmicutes(5);Negativicutes(5);Selenomonadales(5);Veillonellaceae(5);Dialister(1),Veillonella(2),Megasphaera(2)	prophage(2),extrachromosomal(3)	linear (5)	VirSorter(5)	95
Cluster_317	5	5	hallmark(5),phage(4)	Viruses(5);dsDNA viruses no RNA stage(5);Caudovirales(5);Siphoviridae(5);Tunalikevirus(5);unknown(5)	Bacteria(5);Proteobacteria(5);Gammaproteobacteria(5);Pseudomonadales(5);Moraxellaceae(5);Acinetobacter(5)	prophage(1),extrachromosomal(4)	linear (5)	VirSorter(5)	28
Cluster_328	5	0	NCBI_RefSeq(5)	Viruses(5);dsDNA viruses no RNA stage(5);Caudovirales(5);Myoviridae(1),Siphoviridae(4)	Bacteria(5);Proteobacteria(5);Betaproteobacteria(2),Gammaproteobacteria(3);Vibrionales(1),Burkholderiales(2),Pseudomonadales(2);Vibrionaceae(1),Pseudomonadaceae(2),Burkholderiaceae(2);Vibrio(1),Burkholderia(2),Pseudomonas(2)	complete(5)	-	RefSeq(5)
Cluster_287	5	5	hallmark(5),phage(5)	Viruses(5);dsDNA viruses no RNA stage(5);Caudovirales(5);unclassified(1),Myoviridae(4);unclassified(1),unknown(4);unknown(5)	Bacteria(5);Firmicutes(5);Clostridia(5);Clostridiales(5);Peptostreptococcaceae(5);unknown(5)	extrachromosomal(5)	linear (5)	VirSorter(5)	49
Cluster_308	5	4	hallmark(2),NCBI_RefSeq(1),refseq(4)	Viruses(5);unclassified phages(1),dsDNA viruses no RNA stage(4);Caudovirales(4);Siphoviridae(4);unknown(4);unknown(4)	Bacteria(5);Firmicutes(5);Negativicutes(1),Bacilli(4);Selenomonadales(1),Bacillales(4);Veillonellaceae(1),Paenibacillaceae(1),Bacillaceae(3);Pelosinus(1),Brevibacillus(1),Bacillus(3)	prophage(1),complete(1),extrachromosomal(3)	linear (4)	RefSeq(1),VirSorter(4)	79
Cluster_316	5	5	hallmark(5),vdb(5),phage(3)	Viruses(5);dsDNA viruses no RNA stage(5);Caudovirales(5);unclassified(1),Siphoviridae(4);unclassified(1),unknown(4);unclassified(1),unknown(4)	Bacteria(5);Bacteroidetes(5);Bacteroidia(5);Bacteroidales(5);Bacteroidaceae(5);Bacteroides(5)	prophage(5)	linear (5)	VirSorter(5)	79
Cluster_322	5	5	hallmark(5),vdb(1),noncaudo(5)	Viruses(5);ssDNA viruses(5);unknown(5);Inoviridae(5);unclassified(2),unknown(3);unknown(5)	Bacteria(5);Proteobacteria(5);Gammaproteobacteria(5);Xanthomonadales(5);Xanthomonadaceae(5);Stenotrophomonas(1),Xanthomonas(4)	prophage(5)	linear (5)	VirSorter(5)	19
Cluster_329	5	1	hallmark(1),NCBI_RefSeq(4),noncaudo(1)	Viruses(5);dsDNA viruses no RNA stage(5);Caudovirales(1);Myoviridae(1);unknown(1);unknown(1)	Archaea(5);Euryarchaeota(5);Halobacteria(5);Halobacteriales(5);Halobacteriaceae(5);Halococcus(1),Halogranum(1),Haloarcula(3)	prophppppge(1),complete(4)	linear (1)	RefSeq(4),VirSorter(1)	83
Cluster_291	5	5	hallmark(4),phage(4)	Viruses(5);dsDNA viruses no RNA stage(5);Caudovirales(5);Siphoviridae(5);unclassified(1),Lambdalikevirus(1),unknown(3);unknown(5)	Bacteria(5);Firmicutes(5);Clostridia(5);Clostridiales(5);Clostridiaceae(5);Clostridium(5)	extrachromosomal(5)	linear (5)	VirSorter(5)	84
Cluster_325	5	3	hallmark(2),NCBI_RefSeq(2),refseq(3)	Viruses(5);dsDNA viruses no RNA stage(5);Caudovirales(4);unclassified(1),Siphoviridae(3);unknown(3);unknown(3)	Archaea(5);Euryarchaeota(5);Halobacteria(5);Halobacteriales(5);Halobacteriaceae(5);Natrialba(1),unknown(2),Halorubrum(2)	prophage(1),complete(2),extrachromosomal(2)	linear (3)	RefSeq(2),VirSorter(3)	42
Cluster_300	5	5	hallmark(5),vdb(1),phage(4)	Viruses(5);dsDNA viruses no RNA stage(5);Caudovirales(5);unclassified(2),Siphoviridae(3);unknown(2),Lambdalikevirus(3);unknown(5)	Bacteria(5);Proteobacteria(5);Gammaproteobacteria(5);Vibrionales(5);Vibrionaceae(5);Vibrio(5)	prophage(3),extrachromosomal(2)	linear (5)	VirSorter(5)	79
Cluster_319	5	5	hallmark(5)	Viruses(5);dsDNA viruses no RNA stage(5);Caudovirales(5);Myoviridae(5);unknown(5);unknown(5)	Bacteria(5);Spirochaetes(5);Spirochaetia(5);Spirochaetales(5);Leptospiraceae(5);Leptospira(5)	extrachromosomal(5)	linear (5)	VirSorter(5)	26
Cluster_312	5	0	NCBI_RefSeq(5)	Viruses(5);dsDNA viruses no RNA stage(5);Caudovirales(5);Myoviridae(5)	Bacteria(5);Proteobacteria(5);Gammaproteobacteria(5);Enterobacteriales(5);Enterobacteriaceae(5);unknown(1),Escherichia(2),Cronobacter(2)	complete(5)	-	RefSeq(5)
Cluster_293	5	5	hallmark(3),phage(5)	Viruses(5);dsDNA viruses no RNA stage(5);Caudovirales(5);unclassified(5);unclassified(5);unclassified(1),unknown(4)	Bacteria(5);Proteobacteria(5);Gammaproteobacteria(5);Pasteurellales(5);Pasteurellaceae(5);Actinobacillus(2),Mannheimia(3)	prophage(1),extrachromosomal(4)	linear (5)	VirSorter(5)	73
Cluster_302	5	5	noncaudo(5)	Viruses(5);dsDNA viruses no RNA stage(1),ssDNA viruses(4);Caudovirales(1),unknown(4);Myoviridae(1),Inoviridae(4);T4likevirus(1),Inovirus(4);unknown(5)	Bacteria(5);Proteobacteria(5);Gammaproteobacteria(5);Pasteurellales(5);Pasteurellaceae(5);Haemophilus(2),Aggregatibacter(3)	prophage(1),extrachromosomal(4)	linear (5)	VirSorter(5)	17
Cluster_310	5	5	hallmark(4),vdb(2),phage(2)	Viruses(5);dsDNA viruses no RNA stage(5);Caudovirales(5);Siphoviridae(1),unclassified(4);unclassified(5);unknown(5)	Bacteria(5);Deinococcus-Thermus(1),Firmicutes(4);Deinococci(1),Clostridia(4);Deinococcales(1),Clostridiales(4);Ruminococcaceae(1),Deinococcaceae(1),Clostridiaceae(1),Lachnospiraceae(2);Clostridium(1),Deinococcus(1),Ruminococcus(1),Blautia(2)	prophage(1),extrachromosomal(4)	linear (5)	VirSorter(5)	113
Cluster_330	5	2	hallmark(2),NCBI_RefSeq(3),refseq(2)	Viruses(5);dsDNA viruses no RNA stage(5);Caudovirales(5);unclassified(1),Siphoviridae(4);unknown(2);unknown(2)	Bacteria(5);Bacteroidetes(5);Sphingobacteriia(1),Flavobacteriia(1),Cytophagia(1),Bacteroidia(2);Flavobacteriales(1),Sphingobacteriales(1),Cytophagales(1),Bacteroidales(2);Sphingobacteriaceae(1),Cytophagaceae(1),Flavobacteriaceae(1),Bacteroidaceae(2);Pedobacter(1),Croceibacter(1),Spirosoma(1),Bacteroides(2)	prophage(1),complete(3),extrachromosomal(1)	linear (2)	RefSeq(3),VirSorter(2)	83
Cluster_298	5	4	hallmark(4),NCBI_RefSeq(1),refseq(3)	Viruses(5);dsDNA viruses no RNA stage(5);Caudovirales(5);unclassified(1),Podoviridae(4);unclassified(1),P22likevirus(1),unknown(2);unknown(4)	Bacteria(5);Proteobacteria(5);Gammaproteobacteria(5);Xanthomonadales(5);Xanthomonadaceae(5);Xanthomonas(1),Xylella(4)	prophage(1),complete(1),extrachromosomal(3)	linear (4)	RefSeq(1),VirSorter(4)	50
Cluster_294	5	3	hallmark(2),NCBI_RefSeq(2),refseq(1)	Viruses(5);dsDNA viruses no RNA stage(5);Caudovirales(5);Siphoviridae(1),Myoviridae(1),Podoviridae(1),unclassified(2);unclassified(1),unknown(2);unclassified(1),unknown(2)	Bacteria(5);Firmicutes(2),Proteobacteria(3);Betaproteobacteria(1),Bacilli(2),Gammaproteobacteria(2);Burkholderiales(1),Bacillales(2),Enterobacteriales(2);Alcaligenaceae(1),Bacillaceae(1),Paenibacillaceae(1),Enterobacteriaceae(2);Escherichia(1),Paenibacillus(1),Pectobacterium(1),Bacillus(1),Achromobacter(1)	complete(2),extrachromosomal(3)	linear (3)	RefSeq(2),VirSorter(3)	100
Cluster_299	5	5	hallmark(5),phage(5)	Viruses(5);dsDNA viruses no RNA stage(5);Caudovirales(5);Podoviridae(1),unclassified(2),Siphoviridae(2);unclassified(2),unknown(3);unclassified(2),unknown(3)	Bacteria(5);Proteobacteria(5);Gammaproteobacteria(5);Pseudomonadales(5);Moraxellaceae(5);Acinetobacter(5)	prophage(1),extrachromosomal(4)	linear (5)	VirSorter(5)	71
Cluster_304	5	2	hallmark(1),vdb(2),NCBI_RefSeq(3),refseq(2)	Viruses(5);unclassified phages(1),dsDNA viruses no RNA stage(4);Caudovirales(4);unclassified(1),Myoviridae(3);unclassified(1),T4likevirus(1);unknown(2)	Bacteria(5);Bacteroidetes(1),Proteobacteria(4);Gammaproteobacteria(1),Bacteroidia(1),Epsilonproteobacteria(3);Bacteroidales(1),Pseudomonadales(1),Campylobacterales(3);Moraxellaceae(1),Prevotellaceae(1),Campylobacteraceae(3);Prevotella(1),Enhydrobacter(1),Campylobacter(3)	prophage(1),complete(3),extrachromosomal(1)	linear (2)	RefSeq(3),VirSorter(2)	52
Cluster_327	5	5	hallmark(5)	Viruses(5);dsDNA viruses no RNA stage(5);Caudovirales(5);Podoviridae(2),unclassified(3);unknown(1),unclassified(2),P22likevirus(2);unknown(5)	Bacteria(5);Proteobacteria(5);Epsilonproteobacteria(5);Campylobacterales(5);Campylobacteraceae(5);Campylobacter(5)	extrachromosomal(5)	linear (5)	VirSorter(5)	53
Cluster_295	5	5	hallmark(5),phage(1)	Viruses(5);dsDNA viruses no RNA stage(5);Caudovirales(5);Siphoviridae(5);Lambdalikevirus(1),unclassified(2),unknown(2);unclassified(1),unknown(4)	Bacteria(5);Firmicutes(5);Clostridia(5);Clostridiales(5);Clostridiaceae(2),Lachnospiraceae(3);unknown(1),Clostridium(2),Blautia(2)	extrachromosomal(5)	linear (5)	VirSorter(5)	93
Cluster_311	5	4	hallmark(4),NCBI_RefSeq(1),refseq(2)	Viruses(5);dsDNA viruses no RNA stage(5);Caudovirales(5);Siphoviridae(5);unclassified(2),unknown(2);unknown(4)	Bacteria(5);Proteobacteria(5);Gammaproteobacteria(5);Alteromonadales(1),Vibrionales(1),Xanthomonadales(3);Vibrionaceae(1),Alteromonadaceae(1),Xanthomonadaceae(3);Arenimonas(1),Vibrio(1),Marinobacterium(1),Stenotrophomonas(2)	complete(1),extrachromosomal(4)	circular (1) linear (3)	RefSeq(1),VirSorter(4)	57
Cluster_292	5	0	NCBI_RefSeq(5)	Viruses(5);dsDNA viruses no RNA stage(5);Caudovirales(5);Myoviridae(5)	Bacteria(5);Proteobacteria(5);Gammaproteobacteria(1),Betaproteobacteria(4);Xanthomonadales(1),Burkholderiales(4);Xanthomonadaceae(1),Burkholderiaceae(4);Xanthomonas(1),Burkholderia(4)	complete(5)	-	RefSeq(5)
Cluster_301	5	4	hallmark(2),NCBI_RefSeq(1),refseq(3)	Viruses(5);dsDNA viruses no RNA stage(5);Caudovirales(5);Myoviridae(1),Siphoviridae(1),unclassified(3);Phic3unalikevirus(1),unclassified(3);unknown(4)	Bacteria(5);Proteobacteria(5);Alphaproteobacteria(5);Rhizobiales(5);Phyllobacteriaceae(1),Bradyrhizobiaceae(1),Rhizobiaceae(3);Mesorhizobium(1),unknown(1),Rhodopseudomonas(1),Sinorhizobium(2)	prophage(1),complete(1),extrachromosomal(3)	linear (4)	RefSeq(1),VirSorter(4)	29
Cluster_321	5	0	NCBI_RefSeq(5)	Viruses(5);dsDNA viruses no RNA stage(5);Caudovirales(5);Podoviridae(4)	Bacteria(5);Proteobacteria(5);Alphaproteobacteria(2),Gammaproteobacteria(3);Alteromonadales(1),Vibrionales(2),Rhodobacterales(2);Pseudoalteromonadaceae(1),Vibrionaceae(2),Rhodobacteraceae(2);Celeribacter(1),unknown(1),Pseudoalteromonas(1),Vibrio(2)	complete(5)	-	RefSeq(5)
Cluster_324	5	5	noncaudo(4),phage(1)	Viruses(5);ssDNA viruses(5);unknown(5);unknown(5);unclassified(5);unknown(5)	Archaea(5);Euryarchaeota(5);Halobacteria(5);Halobacteriales(5);Halobacteriaceae(5);Haloferax(5)	prophage(4),extrachromosomal(1)	linear (5)	VirSorter(5)	31
Cluster_315	5	5	hallmark(5),phage(5)	Viruses(5);dsDNA viruses no RNA stage(5);Caudovirales(5);Siphoviridae(5);C2likevirus(1),unknown(4);unknown(5)	Bacteria(5);Bacteroidetes(5);Bacteroidia(5);Bacteroidales(5);Rikenellaceae(1),Porphyromonadaceae(2),Bacteroidaceae(2);Alistipes(1),Porphyromonas(2),Bacteroides(2)	extrachromosomal(5)	linear (5)	VirSorter(5)	60
Cluster_288	5	3	hallmark(3),NCBI_RefSeq(2),refseq(3)	Viruses(5);dsDNA viruses no RNA stage(5);Caudovirales(5);Myoviridae(5);unknown(3);unknown(3)	Bacteria(5);Proteobacteria(5);Betaproteobacteria(1),Gammaproteobacteria(4);Burkholderiales(1),Pasteurellales(4);Alcaligenaceae(1),Pasteurellaceae(4);unknown(1),Pelistega(1),Haemophilus(1),Aggregatibacter(2)	complete(2),extrachromosomal(3)	linear (3)	RefSeq(2),VirSorter(3)	53
Cluster_307	5	5	hallmark(5),phage(4)	Viruses(5);dsDNA viruses no RNA stage(5);Caudovirales(5);Podoviridae(5);(1),unknown(1),unclassified(3);unknown(5)	Bacteria(5);Proteobacteria(5);Gammaproteobacteria(5);Pseudomonadales(5);Moraxellaceae(5);Acinetobacter(5)	extrachromosomal(5)	linear (5)	VirSorter(5)	61
Cluster_323	5	4	hallmark(2),NCBI_RefSeq(1),refseq(3)	Viruses(5);dsDNA viruses no RNA stage(5);Caudovirales(5);Myoviridae(1),Siphoviridae(1),Podoviridae(1),unclassified(2);Phic3unalikevirus(1),T4likevirus(1),unclassified(2);unknown(4)	Bacteria(5);Marinimicrobia(1),Proteobacteria(4);Alphaproteobacteria(1),unknown(1),Gammaproteobacteria(3);Oceanospirillales(1),unknown(4);unknown(5);Candidatus Puniceispirillum(1),SUP05(1),unknown(3)	complete(1),extrachromosomal(4)	linear (4)	RefSeq(1),VirSorter(4)	68
Cluster_296	5	5	hallmark(1),phage(5)	Viruses(5);dsDNA viruses no RNA stage(5);Caudovirales(5);unclassified(5);unclassified(5);unclassified(5)	Bacteria(5);Proteobacteria(5);Gammaproteobacteria(5);Enterobacteriales(5);Enterobacteriaceae(5);Salmonella(5)	prophage(1),extrachromosomal(4)	linear (5)	VirSorter(5)	34
Cluster_331	5	5	phage(5)	Viruses(5);dsDNA viruses no RNA stage(5);unknown(1),unclassified(4);unknown(1),unclassified(4);unknown(5);unknown(5)	Bacteria(5);Firmicutes(5);Bacilli(5);Bacillales(5);Staphylococcaceae(5);Staphylococcus(5)	extrachromosomal(5)	linear (5)	VirSorter(5)	21
Cluster_303	5	5	hallmark(1),noncaudo(4),phage(1)	Viruses(5);ssDNA viruses(2),dsDNA viruses no RNA stage(3);unknown(2),Caudovirales(3);Siphoviridae(1),Inoviridae(2),Myoviridae(2);Lambdalikevirus(1),Inovirus(2),Hpunalikevirus(2);unknown(5)	Bacteria(5);Proteobacteria(5);Gammaproteobacteria(5);Vibrionales(5);Vibrionaceae(5);Photobacterium(2),Vibrio(3)	prophage(3),extrachromosomal(2)	linear (5)	VirSorter(5)	28
Cluster_289	5	2	hallmark(2),NCBI_RefSeq(3),refseq(2)	Viruses(5);dsDNA viruses no RNA stage(5);Caudovirales(5);Siphoviridae(5);unclassified(2);unknown(2)	Bacteria(5);Firmicutes(5);Bacilli(5);Lactobacillales(5);Lactobacillaceae(5);Lactobacillus(4)	complete(3),extrachromosomal(2)	linear (2)	RefSeq(3),VirSorter(2)	24
Cluster_314	5	5	hallmark(4),phage(3)	Viruses(5);dsDNA viruses no RNA stage(5);Caudovirales(5);unclassified(2),Siphoviridae(3);unknown(1),Tunalikevirus(1),unclassified(3);unknown(2),unclassified(3)	Bacteria(5);Bacteroidetes(5);Flavobacteriia(1),Bacteroidia(4);Flavobacteriales(1),Bacteroidales(4);Flavobacteriaceae(1),Rikenellaceae(1),Bacteroidaceae(1),Prevotellaceae(2);Riemerella(1),Alistipes(1),Bacteroides(1),Prevotella(2)	prophage(3),extrachromosomal(2)	linear (5)	VirSorter(5)	98
Cluster_297	5	5	hallmark(5)	Viruses(5);dsDNA viruses no RNA stage(5);Caudovirales(5);Siphoviridae(1),Myoviridae(4);Lambdalikevirus(1),unknown(4);unknown(5)	Bacteria(5);Spirochaetes(5);Spirochaetia(5);Spirochaetales(5);Leptospiraceae(5);Leptospira(5)	prophage(1),extrachromosomal(4)	linear (5)	VirSorter(5)	57
Cluster_326	5	5	hallmark(5),phage(2)	Viruses(5);dsDNA viruses no RNA stage(5);Caudovirales(5);Myoviridae(2),Siphoviridae(3);unclassified(1),Yualikevirus(2),(2);unknown(5)	Bacteria(5);Proteobacteria(5);Alphaproteobacteria(5);Sphingomonadales(5);Sphingomonadaceae(5);Sphingobium(5)	prophage(1),extrachromosomal(4)	linear (5)	VirSorter(5)	40
Cluster_306	5	5	hallmark(5)	Viruses(5);dsDNA viruses no RNA stage(5);Caudovirales(5);unclassified(2),Myoviridae(3);unclassified(2),Twortlikevirus(3);unknown(5)	Bacteria(5);Spirochaetes(5);Spirochaetia(5);Spirochaetales(5);Leptospiraceae(5);Leptospira(5)	extrachromosomal(5)	linear (5)	VirSorter(5)	44
Cluster_305	5	5	hallmark(5),vdb(1),phage(2)	Viruses(5);dsDNA viruses no RNA stage(5);Caudovirales(5);Siphoviridae(2),unclassified(3);unknown(1),unclassified(2),Lambdalikevirus(2);unclassified(1),unknown(4)	Bacteria(5);Bacteroidetes(5);Bacteroidia(5);Bacteroidales(5);Bacteroidaceae(1),Prevotellaceae(4);Bacteroides(1),Paraprevotella(2),Prevotella(2)	prophage(1),extrachromosomal(4)	linear (5)	VirSorter(5)	94
Cluster_320	5	5	hallmark(4),vdb(3),phage(3)	Viruses(5);dsDNA viruses no RNA stage(5);Caudovirales(5);Siphoviridae(5);unknown(5);unknown(5)	Bacteria(5);Bacteroidetes(5);Bacteroidia(5);Bacteroidales(5);Bacteroidaceae(5);Bacteroides(5)	prophage(3),extrachromosomal(2)	linear (5)	VirSorter(5)	84
Cluster_341	4	4	hallmark(4),phage(1)	Viruses(4);dsDNA viruses no RNA stage(4);Caudovirales(4);unclassified(1),Siphoviridae(3);unclassified(2),Tunalikevirus(2);unknown(4)	Bacteria(4);Proteobacteria(4);Gammaproteobacteria(1),Betaproteobacteria(3);Pseudomonadales(1),Neisseriales(3);Moraxellaceae(1),Neisseriaceae(3);Acinetobacter(1),Neisseria(3)	prophage(1),extrachromosomal(3)	linear (4)	VirSorter(4)	56
Cluster_381	4	3	NCBI_RefSeq(1),noncaudo(1),refseq(2)	Viruses(4);ssDNA viruses(4);(1),unknown(3);Inoviridae(4);Plectrovirus(4);unknown(3)	Bacteria(4);Tenericutes(4);Mollicutes(4);Entomoplasmatales(4);Spiroplasmataceae(4);unknown(1),Spiroplasma(3)	prophppppge(3),complete(1)	linear (3)	RefSeq(1),VirSorter(3)	97
Cluster_370	4	0	NCBI_RefSeq(4)	Viruses(4);dsDNA viruses no RNA stage(4);Caudovirales(4);Podoviridae(4);N4likevirus(4)	Bacteria(4);Proteobacteria(4);Gammaproteobacteria(4);Enterobacteriales(4);Enterobacteriaceae(4);Enterobacter(1),Erwinia(1),Salmonella(2)	complete(4)	-	RefSeq(4)
Cluster_356	4	4	hallmark(4),phage(4)	Viruses(4);dsDNA viruses no RNA stage(4);Caudovirales(4);Siphoviridae(4);unknown(2),unclassified(2);unknown(4)	Bacteria(4);Firmicutes(4);Bacilli(4);Lactobacillales(4);Streptococcaceae(4);Lactococcus(4)	prophage(1),extrachromosomal(3)	linear (4)	VirSorter(4)	50
Cluster_352	4	4	hallmark(4),phage(3)	Viruses(4);dsDNA viruses no RNA stage(4);Caudovirales(1),unclassified(3);Podoviridae(1),unclassified(3);unknown(1),unclassified(3);unknown(4)	Bacteria(4);Proteobacteria(4);Alphaproteobacteria(4);Rhizobiales(4);Rhizobiaceae(4);Sinorhizobium(4)	prophage(3),extrachromosomal(1)	linear (4)	VirSorter(4)	55
Cluster_388	4	0	NCBI_RefSeq(4)	Viruses(4);dsDNA viruses no RNA stage(4);Caudovirales(4);Myoviridae(4)	Bacteria(4);Proteobacteria(4);Gammaproteobacteria(4);Pseudomonadales(4);Pseudomonadaceae(4);Pseudomonas(4)	complete(4)	-	RefSeq(4)
Cluster_378	4	4	phage(4)	Viruses(4);dsDNA viruses no RNA stage(4);Caudovirales(4);unclassified(1),Siphoviridae(3);unknown(4);unknown(4)	Bacteria(4);Firmicutes(4);Bacilli(4);Lactobacillales(4);Streptococcaceae(4);Streptococcus(4)	extrachromosomal(4)	linear (4)	VirSorter(4)	20
Cluster_387	4	1	hallmark(1),NCBI_RefSeq(3),refseq(1)	Viruses(4);dsDNA viruses no RNA stage(4);Caudovirales(4);Siphoviridae(4);unknown(1);unknown(1)	Eukaryota(1),Bacteria(3);Streptophyta(1),Actinobacteria(3);unknown(1),Actinobacteria(3);Ericales(1),Actinomycetales(3);Corynebacteriaceae(1),Theaceae(1),Gordoniaceae(2);Corynebacterium(1),unknown(1),Gordonia(2)	complete(3),extrachromosomal(1)	linear (1)	RefSeq(3),VirSorter(1)	79
Cluster_380	4	4	noncaudo(4)	Viruses(4);ssDNA viruses(4);unknown(4);unknown(4);unknown(1),(3);unknown(4)	Archaea(4);Euryarchaeota(4);Halobacteria(4);Halobacteriales(4);Halobacteriaceae(4);Halobiforma(1),Natronolimnobius(1),Natronorubrum(2)	prophage(2),extrachromosomal(2)	linear (4)	VirSorter(4)	20
Cluster_344	4	4	hallmark(4)	Viruses(4);dsDNA viruses no RNA stage(4);Caudovirales(4);Myoviridae(4);T4likevirus(1),Twortlikevirus(3);unknown(4)	Bacteria(4);Marinimicrobia(1),Spirochaetes(3);unknown(1),Spirochaetia(3);unknown(1),Spirochaetales(3);unknown(1),Leptospiraceae(3);unknown(1),Leptospira(3)	extrachromosomal(4)	linear (4)	VirSorter(4)	42
Cluster_342	4	3	hallmark(3),NCBI_RefSeq(1),refseq(2)	Viruses(4);dsDNA viruses no RNA stage(4);Caudovirales(3);Siphoviridae(3);unknown(1),Lambdalikevirus(2);unknown(3)	Bacteria(4);Proteobacteria(4);Alphaproteobacteria(4);Rhizobiales(1),Rhodobacterales(1),Sphingomonadales(2);Aurantimonadaceae(1),Rhodobacteraceae(1),Sphingomonadaceae(2);Aureimonas(1),Novosphingobium(1),Rhodobacter(1),Sphingobium(1)	complete(1),extrachromosomal(3)	linear (3)	RefSeq(1),VirSorter(3)	46
Cluster_355	4	4	hallmark(4),phage(2)	Viruses(4);dsDNA viruses no RNA stage(4);Caudovirales(4);Siphoviridae(1),Myoviridae(1),unclassified(2);Lambdalikevirus(1),unclassified(3);unknown(4)	Bacteria(4);Fusobacteria(1),Firmicutes(3);Fusobacteriia(1),Clostridia(3);Fusobacteriales(1),Clostridiales(3);Leptotrichiaceae(1),Clostridiaceae(1),Oscillospiraceae(2);Clostridium(1),Leptotrichia(1),Oscillibacter(2)	prophage(2),extrachromosomal(2)	linear (4)	VirSorter(4)	83
Cluster_389	4	0	NCBI_RefSeq(4)	Viruses(4);dsDNA viruses no RNA stage(4)	Archaea(4);Euryarchaeota(4);Halobacteria(4);Halobacteriales(4);Halobacteriaceae(4);Haloferax(1),Halorubrum(3)	complete(4)	-	RefSeq(4)
Cluster_362	4	4	hallmark(3),phage(4)	Viruses(4);dsDNA viruses no RNA stage(4);Caudovirales(4);Siphoviridae(4);unclassified(1),unknown(3);unknown(4)	Bacteria(4);Actinobacteria(4);Actinobacteria(4);Actinomycetales(4);Mycobacteriaceae(4);Mycobacterium(4)	prophage(2),extrachromosomal(2)	linear (4)	VirSorter(4)	50
Cluster_379	4	2	hallmark(2),NCBI_RefSeq(2)	Viruses(4);dsDNA viruses no RNA stage(4);Caudovirales(4);unclassified(1),Podoviridae(3);unclassified(2);unknown(2)	Bacteria(4);Proteobacteria(4);Alphaproteobacteria(1),Betaproteobacteria(1),Gammaproteobacteria(2);Alteromonadales(1),Vibrionales(1),Burkholderiales(1),Sphingomonadales(1);Vibrionaceae(1),Colwelliaceae(1),Sphingomonadaceae(1),Comamonadaceae(1);Comamonas(1),Thalassomonas(1),Vibrio(1),Sphingomonas(1)	complete(2),extrachromosomal(2)	linear (2)	RefSeq(2),VirSorter(2)	42
Cluster_393	4	3	hallmark(3),NCBI_RefSeq(1),refseq(1)	Viruses(4);dsDNA viruses no RNA stage(4);Caudovirales(4);Myoviridae(1),Siphoviridae(3);unclassified(3);unclassified(3)	Bacteria(4);Firmicutes(4);Clostridia(2),Bacilli(2);Bacillales(2),Clostridiales(2);Bacillaceae(2),Clostridiaceae(2);Clostridium(2),Bacillus(2)	complete(1),extrachromosomal(3)	circular (1) linear (2)	RefSeq(1),VirSorter(3)	116
Cluster_391	4	2	hallmark(1),NCBI_RefSeq(2),refseq(2)	Viruses(4);unclassified phages(1),dsDNA viruses no RNA stage(3);Caudovirales(3);Siphoviridae(3);unknown(2);unknown(2)	Bacteria(4);Actinobacteria(4);Actinobacteria(4);Actinomycetales(4);Nocardiaceae(1),Mycobacteriaceae(3);Rhodococcus(1),Mycobacterium(3)	prophage(1),complete(2),extrachromosomal(1)	linear (2)	RefSeq(2),VirSorter(2)	78
Cluster_343	4	0	NCBI_RefSeq(4)	Viruses(4);dsDNA viruses no RNA stage(4);Caudovirales(4);Podoviridae(1),Siphoviridae(3)	Bacteria(4);Firmicutes(4);Bacilli(4);Lactobacillales(4);Leuconostocaceae(4);Weissella(1),Leuconostoc(3)	complete(4)	-	RefSeq(4)
Cluster_354	4	4	hallmark(3),phage(3)	Viruses(4);unclassified(1),dsDNA viruses no RNA stage(3);unclassified(1),Caudovirales(3);unclassified(1),Siphoviridae(3);unclassified(2),L5likevirus(2);unknown(4)	Bacteria(4);Actinobacteria(4);Actinobacteria(4);Actinomycetales(4);Actinomycetaceae(1),Nocardiaceae(3);Actinomyces(1),Rhodococcus(3)	extrachromosomal(4)	linear (4)	VirSorter(4)	67
Cluster_353	4	4	hallmark(1),phage(4)	Viruses(4);dsDNA viruses no RNA stage(4);Caudovirales(4);unclassified(1),Podoviridae(3);unclassified(1),(3);unknown(4)	Bacteria(4);Proteobacteria(4);Gammaproteobacteria(4);Enterobacteriales(4);Enterobacteriaceae(4);Escherichia(4)	extrachromosomal(4)	linear (4)	VirSorter(4)	27
Cluster_345	4	0	NCBI_RefSeq(4)	Viruses(4);dsDNA viruses no RNA stage(4);Caudovirales(4);Podoviridae(4)	Bacteria(4);Firmicutes(4);Clostridia(4);Clostridiales(4);Clostridiaceae(4);Clostridium(4)	complete(4)	-	RefSeq(4)
Cluster_376	4	4	hallmark(4)	Viruses(4);dsDNA viruses no RNA stage(4);Caudovirales(4);Siphoviridae(4);Lambdalikevirus(4);unknown(4)	Bacteria(4);Proteobacteria(4);Alphaproteobacteria(4);Rhodospirillales(4);Acetobacteraceae(4);Gluconobacter(1),unknown(1),Acetobacter(2)	extrachromosomal(4)	linear (4)	VirSorter(4)	47
Cluster_332	4	2	hallmark(1),vdb(1),NCBI_RefSeq(2),refseq(2)	Viruses(4);dsDNA viruses no RNA stage(4);Caudovirales(4);Siphoviridae(4);unclassified(1),unknown(1);unknown(2)	Bacteria(4);Firmicutes(4);Bacilli(4);Lactobacillales(4);Enterococcaceae(4);Enterococcus(4)	prophage(1),complete(2),extrachromosomal(1)	linear (2)	RefSeq(2),VirSorter(2)	68
Cluster_335	4	1	hallmark(1),NCBI_RefSeq(3),refseq(1)	Viruses(4);dsDNA viruses no RNA stage(4);Caudovirales(4);unclassified(1),Siphoviridae(3);unclassified(1);unclassified(1)	Bacteria(4);Firmicutes(4);Bacilli(1),Clostridia(3);Lactobacillales(1),Clostridiales(3);Streptococcaceae(1),Eubacteriaceae(1),Clostridiaceae(2);Streptococcus(1),Eubacterium(1),Clostridium(2)	complete(3),extrachromosomal(1)	linear (1)	RefSeq(3),VirSorter(1)	98
Cluster_364	4	1	hallmark(1),NCBI_RefSeq(3),refseq(1)	Viruses(4);dsDNA viruses no RNA stage(4);Caudovirales(4);Siphoviridae(4);unclassified(1);unknown(1)	Bacteria(4);Firmicutes(4);Bacilli(4);Bacillales(1),Lactobacillales(3);Bacillaceae(1),Lactobacillaceae(3);Lysinibacillus(1),Lactobacillus(3)	complete(3),extrachromosomal(1)	linear (1)	RefSeq(3),VirSorter(1)	43
Cluster_390	4	4	hallmark(4)	Viruses(4);dsDNA viruses no RNA stage(4);Caudovirales(4);Siphoviridae(4);unclassified(4);unknown(4)	Bacteria(4);Proteobacteria(4);Gammaproteobacteria(4);Xanthomonadales(4);Xanthomonadaceae(4);Xanthomonas(4)	extrachromosomal(4)	linear (4)	VirSorter(4)	38
Cluster_346	4	4	hallmark(3),phage(4)	Viruses(4);dsDNA viruses no RNA stage(4);Caudovirales(4);unclassified(4);unclassified(4);unclassified(4)	Bacteria(4);Proteobacteria(4);Gammaproteobacteria(4);Pseudomonadales(4);Moraxellaceae(4);Acinetobacter(4)	prophage(4)	linear (4)	VirSorter(4)	34
Cluster_377	4	0	NCBI_RefSeq(4)	Viruses(4);dsDNA viruses no RNA stage(4);Caudovirales(4);Podoviridae(4)	Bacteria(4);Cyanobacteria(4);unknown(4);Prochlorales(4);Prochlorococcaceae(4);Prochlorococcus(4)	complete(4)	-	RefSeq(4)
Cluster_333	4	4	hallmark(4),phage(2)	Viruses(4);dsDNA viruses no RNA stage(4);Caudovirales(4);unclassified(2),Siphoviridae(2);unclassified(2),Lambdalikevirus(2);unknown(2),unclassified(2)	Bacteria(4);Firmicutes(4);Bacilli(4);Bacillales(4);Planococcaceae(2),Bacillaceae(2);Kurthia(2),Bacillus(2)	extrachromosomal(4)	linear (4)	VirSorter(4)	102
Cluster_365	4	4	hallmark(4),vdb(1),phage(1)	Viruses(4);dsDNA viruses no RNA stage(4);Caudovirales(4);Siphoviridae(4);unknown(1),Lambdalikevirus(1),unclassified(2);unknown(4)	Bacteria(4);Firmicutes(4);Bacilli(4);Bacillales(4);Bacillaceae(4);Bacillus(4)	extrachromosomal(4)	circular (1) linear (3)	VirSorter(4)	85
Cluster_334	4	4	hallmark(4),phage(4)	Viruses(4);dsDNA viruses no RNA stage(4);Caudovirales(4);Siphoviridae(4);unknown(4);unknown(4)	Bacteria(4);Firmicutes(4);Bacilli(4);Lactobacillales(4);Lactobacillaceae(4);Lactobacillus(4)	extrachromosomal(4)	linear (4)	VirSorter(4)	56
Cluster_359	4	4	hallmark(4)	Viruses(4);dsDNA viruses no RNA stage(4);Caudovirales(4);Siphoviridae(4);Lambdalikevirus(4);unknown(4)	Bacteria(4);Proteobacteria(4);Gammaproteobacteria(1),Betaproteobacteria(1),Zetaproteobacteria(2);Gallionellales(1),unknown(3);Gallionellaceae(1),unknown(3);Gallionella(1),unknown(3)	extrachromosomal(4)	linear (4)	VirSorter(4)	29
Cluster_361	4	4	hallmark(4),phage(4)	Viruses(4);dsDNA viruses no RNA stage(4);Caudovirales(4);Siphoviridae(4);unknown(1),unclassified(3);unknown(4)	Bacteria(4);Firmicutes(4);Bacilli(4);Lactobacillales(4);Streptococcaceae(4);Streptococcus(4)	extrachromosomal(4)	linear (4)	VirSorter(4)	34
Cluster_347	4	3	hallmark(3),NCBI_RefSeq(1),refseq(3)	Viruses(4);dsDNA viruses no RNA stage(4);Caudovirales(3);unclassified(1),Myoviridae(2);unclassified(1),unknown(2);unknown(3)	Bacteria(4);Proteobacteria(4);Gammaproteobacteria(4);Vibrionales(1),Enterobacteriales(3);Vibrionaceae(1),Enterobacteriaceae(3);Escherichia(1),Salmonella(1),Citrobacter(1),Vibrio(1)	prophage(1),complete(1),extrachromosomal(2)	linear (3)	RefSeq(1),VirSorter(3)	74
Cluster_384	4	0	NCBI_RefSeq(4)	Viruses(4);dsDNA viruses no RNA stage(4);Caudovirales(4);Siphoviridae(4)	Bacteria(4);Actinobacteria(4);Actinobacteria(4);Actinomycetales(4);Mycobacteriaceae(4);unknown(1),Mycobacterium(3)	complete(4)	-	RefSeq(4)
Cluster_394	4	3	hallmark(3),NCBI_RefSeq(1),refseq(1)	Viruses(4);dsDNA viruses no RNA stage(4);Caudovirales(4);Siphoviridae(4);unclassified(1),unknown(2);unknown(3)	Bacteria(4);Actinobacteria(4);Actinobacteria(4);Actinomycetales(4);Nocardiaceae(1),Gordoniaceae(1),Actinomycetaceae(2);Rhodococcus(1),Varibaculum(1),Gordonia(1),Actinomyces(1)	complete(1),extrachromosomal(3)	circular (1) linear (2)	RefSeq(1),VirSorter(3)	22
Cluster_375	4	2	hallmark(2),NCBI_RefSeq(2),refseq(1)	Viruses(4);dsDNA viruses no RNA stage(4);Caudovirales(4);unclassified(1),Siphoviridae(3);unknown(1),Spbetalikevirus(1);unknown(2)	Bacteria(4);Firmicutes(4);Clostridia(4);Clostridiales(4);Ruminococcaceae(1),Clostridiaceae(3);Ruminococcus(1),Clostridium(3)	prophage(1),complete(2),extrachromosomal(1)	linear (2)	RefSeq(2),VirSorter(2)	72
Cluster_383	4	2	hallmark(2),NCBI_RefSeq(2),refseq(2)	Viruses(4);dsDNA viruses no RNA stage(4);Caudovirales(4);Siphoviridae(4);unclassified(2);unknown(2)	Bacteria(4);Actinobacteria(4);Actinobacteria(4);Actinomycetales(4);Brevibacteriaceae(1),Nocardiaceae(1),Corynebacteriaceae(2);Nocardia(1),unknown(1),Corynebacterium(2)	complete(2),extrachromosomal(2)	linear (2)	RefSeq(2),VirSorter(2)	42
Cluster_348	4	4	hallmark(4)	Viruses(4);dsDNA viruses no RNA stage(4);Caudovirales(4);Siphoviridae(4);Lambdalikevirus(4);unknown(4)	Bacteria(4);Proteobacteria(4);Betaproteobacteria(4);Neisseriales(4);Neisseriaceae(4);Neisseria(4)	prophage(1),extrachromosomal(3)	linear (4)	VirSorter(4)	35
Cluster_337	4	4	hallmark(1),vdb(1),phage(4)	Viruses(4);dsDNA viruses no RNA stage(4);Caudovirales(4);Siphoviridae(4);unclassified(1),unknown(3);unknown(4)	Bacteria(4);Firmicutes(4);Bacilli(4);Bacillales(4);Staphylococcaceae(4);Staphylococcus(4)	prophage(1),extrachromosomal(3)	linear (4)	VirSorter(4)	77
Cluster_385	4	0	NCBI_RefSeq(4)	Viruses(4);ssDNA viruses(4);(4);Microviridae(4);Microvirus(4)	Bacteria(4);Proteobacteria(4);Gammaproteobacteria(4);Enterobacteriales(4);Enterobacteriaceae(4);Escherichia(4)	complete(4)	-	RefSeq(4)
Cluster_395	4	4	hallmark(4)	Viruses(4);dsDNA viruses no RNA stage(4);Caudovirales(4);unclassified(1),Myoviridae(1),Siphoviridae(2);unclassified(1),Punalikevirus(1),unknown(2);unclassified(1),unknown(3)	Bacteria(4);Proteobacteria(4);Alphaproteobacteria(4);Rhodospirillales(4);Acetobacteraceae(4);Acetobacter(1),Gluconacetobacter(1),Komagataeibacter(2)	extrachromosomal(4)	linear (4)	VirSorter(4)	56
Cluster_358	4	0	NCBI_RefSeq(4)	Viruses(4);dsDNA viruses no RNA stage(4);Caudovirales(4);Siphoviridae(4)	Bacteria(4);Firmicutes(4);Clostridia(4);Clostridiales(4);Clostridiaceae(4);Clostridium(4)	complete(4)	-	RefSeq(4)
Cluster_373	4	3	hallmark(2),NCBI_RefSeq(1),refseq(3)	Viruses(4);dsDNA viruses no RNA stage(4);Caudovirales(4);Siphoviridae(4);unclassified(1),unknown(2);unknown(3)	Bacteria(4);Bacteroidetes(4);Flavobacteriia(4);Flavobacteriales(4);Flavobacteriaceae(4);Capnocytophaga(1),Riemerella(3)	complete(1),extrachromosomal(3)	circular (1) linear (2)	RefSeq(1),VirSorter(3)	63
Cluster_367	4	4	hallmark(2),phage(4)	Viruses(4);dsDNA viruses no RNA stage(4);Caudovirales(4);Myoviridae(4);(1),unclassified(1),unknown(2);unknown(4)	Bacteria(4);Proteobacteria(4);Epsilonproteobacteria(1),Gammaproteobacteria(3);Campylobacterales(1),Enterobacteriales(3);Campylobacteraceae(1),Enterobacteriaceae(3);Campylobacter(1),Yersinia(3)	extrachromosomal(4)	circular (1) linear (3)	VirSorter(4)	45
Cluster_357	4	1	hallmark(1),NCBI_RefSeq(3)	Viruses(4);dsDNA viruses no RNA stage(4);Caudovirales(2);Siphoviridae(2);unknown(1);unknown(1)	Bacteria(4);Bacteroidetes(4);Bacteroidia(1),Flavobacteriia(3);Bacteroidales(1),Flavobacteriales(3);Porphyromonadaceae(1),Flavobacteriaceae(3);Cellulophaga(1),Odoribacter(1)	complete(3),extrachromosomal(1)	linear (1)	RefSeq(3),VirSorter(1)	21
Cluster_350	4	4	vdb(4),phage(4)	Viruses(4);dsDNA viruses no RNA stage(4);Caudovirales(4);unclassified(1),Siphoviridae(1),Myoviridae(2);unclassified(1),unknown(3);unclassified(1),unknown(3)	Bacteria(4);Firmicutes(4);unknown(1),Bacilli(3);unknown(1),Lactobacillales(3);unknown(1),Enterococcaceae(1),Streptococcaceae(2);unknown(1),Enterococcus(1),Streptococcus(2)	extrachromosomal(4)	linear (4)	VirSorter(4)	21
Cluster_339	4	4	hallmark(4),phage(1)	Viruses(4);dsDNA viruses no RNA stage(4);Caudovirales(4);Myoviridae(4);unknown(4);unknown(4)	Bacteria(4);Firmicutes(4);Clostridia(4);Clostridiales(4);Peptostreptococcaceae(4);unknown(4)	extrachromosomal(4)	linear (4)	VirSorter(4)	18
Cluster_336	4	4	hallmark(4),phage(1)	Viruses(4);dsDNA viruses no RNA stage(4);Caudovirales(4);Siphoviridae(4);Lambdalikevirus(4);unknown(4)	Bacteria(4);Firmicutes(4);Bacilli(4);Lactobacillales(4);Enterococcaceae(4);Enterococcus(4)	prophage(1),extrachromosomal(3)	linear (4)	VirSorter(4)	19
Cluster_369	4	4	hallmark(4),phage(1)	Viruses(4);dsDNA viruses no RNA stage(4);Caudovirales(4);Siphoviridae(1),unclassified(3);Tunalikevirus(1),unclassified(3);unclassified(2),unknown(2)	Bacteria(4);Proteobacteria(4);Gammaproteobacteria(4);Pseudomonadales(4);Moraxellaceae(4);Acinetobacter(4)	extrachromosomal(4)	circular (2) linear (2)	VirSorter(4)	59
Cluster_363	4	4	hallmark(4),phage(4)	Viruses(4);dsDNA viruses no RNA stage(4);Caudovirales(4);Siphoviridae(4);unclassified(4);unknown(4)	Bacteria(4);Firmicutes(4);Bacilli(4);Lactobacillales(4);Lactobacillaceae(4);Lactobacillus(4)	prophage(4)	linear (4)	VirSorter(4)	50
Cluster_372	4	0	NCBI_RefSeq(4)	Viruses(4);ssRNA positive-strand viruses no DNA stage(4);(4);Leviviridae(4);Levivirus(2)	Bacteria(4);Proteobacteria(4);Gammaproteobacteria(4);Pseudomonadales(1),Enterobacteriales(3);Enterobacteriaceae(1),Pseudomonadaceae(1),unknown(2);Escherichia(1),unknown(3)	complete(4)	-	RefSeq(4)
Cluster_366	4	4	hallmark(4),noncaudo(4)	Viruses(4);ssDNA viruses(4);unknown(4);Inoviridae(4);Inovirus(4);unknown(4)	Bacteria(4);Proteobacteria(4);Gammaproteobacteria(4);Xanthomonadales(4);Xanthomonadaceae(4);Xanthomonas(4)	prophage(2),extrachromosomal(2)	linear (4)	VirSorter(4)	22
Cluster_392	4	0	NCBI_RefSeq(4)	Viruses(4);dsDNA viruses no RNA stage(4);(4);Rudiviridae(4);Rudivirus(4)	Archaea(4);Crenarchaeota(4);Thermoprotei(4);Sulfolobales(4);Sulfolobaceae(4);Acidianus(1),unknown(1),Sulfolobus(2)	complete(4)	-	RefSeq(4)
Cluster_360	4	2	NCBI_RefSeq(2),refseq(2)	Viruses(4);dsDNA viruses no RNA stage(4);Caudovirales(4);Siphoviridae(4);unknown(2);unknown(2)	Bacteria(4);Firmicutes(4);Bacilli(4);Lactobacillales(4);Streptococcaceae(4);Lactococcus(4)	prophppppge(2),complete(2)	linear (2)	RefSeq(2),VirSorter(2)	41
Cluster_368	4	4	hallmark(4),vdb(1)	Viruses(4);dsDNA viruses no RNA stage(4);Caudovirales(4);unclassified(1),Siphoviridae(3);unclassified(1),unknown(3);unknown(4)	Bacteria(4);Firmicutes(4);Clostridia(2),unknown(2);unknown(2),Clostridiales(2);Ruminococcaceae(1),Oscillospiraceae(1),unknown(2);Oscillibacter(1),Ruminococcus(1),unknown(2)	extrachromosomal(4)	linear (4)	VirSorter(4)	42
Cluster_351	4	4	hallmark(4),phage(2)	Viruses(4);dsDNA viruses no RNA stage(4);Caudovirales(4);Siphoviridae(1),unclassified(3);Spbetalikevirus(1),unclassified(3);unknown(1),unclassified(3)	Bacteria(4);Proteobacteria(4);Gammaproteobacteria(1),Betaproteobacteria(3);Enterobacteriales(1),Burkholderiales(3);Enterobacteriaceae(1),Oxalobacteraceae(1),Burkholderiaceae(2);Candidatus Glomeribacter(1),Herbaspirillum(1),Pantoea(1),Ralstonia(1)	prophage(1),extrachromosomal(3)	linear (4)	VirSorter(4)	53
Cluster_382	4	3	hallmark(3),NCBI_RefSeq(1),refseq(3)	Viruses(4);dsDNA viruses no RNA stage(4);Caudovirales(4);Siphoviridae(4);unknown(1),unclassified(2);unknown(3)	Bacteria(4);Actinobacteria(4);Actinobacteria(4);Coriobacteriales(1),Actinomycetales(3);Coriobacteriaceae(1),Microbacteriaceae(3);Agrococcus(1),Olsenella(1),Microbacterium(2)	prophage(1),complete(1),extrachromosomal(2)	linear (3)	RefSeq(1),VirSorter(3)	78
Cluster_374	4	3	hallmark(3),NCBI_RefSeq(1),refseq(3)	Viruses(4);dsDNA viruses no RNA stage(4);Caudovirales(4);Siphoviridae(4);Phic3unalikevirus(1),Lambdalikevirus(1),unclassified(2);unknown(3)	Bacteria(4);Actinobacteria(4);Actinobacteria(4);Actinomycetales(4);Actinomycetaceae(1),Streptomycetaceae(3);Actinomyces(1),Streptomyces(3)	complete(1),extrachromosomal(3)	linear (3)	RefSeq(1),VirSorter(3)	89
Cluster_371	4	0	NCBI_RefSeq(4)	Viruses(4);dsDNA viruses no RNA stage(4);Caudovirales(4);Podoviridae(4);N4likevirus(3)	Bacteria(4);Proteobacteria(4);Gammaproteobacteria(4);Alteromonadales(2),Vibrionales(2);Pseudoalteromonadaceae(1),Alteromonadaceae(1),Vibrionaceae(2);Alteromonas(1),Pseudoalteromonas(1),Vibrio(2)	complete(4)	-	RefSeq(4)
Cluster_338	4	4	hallmark(3),phage(4)	Viruses(4);dsDNA viruses no RNA stage(4);Caudovirales(4);Myoviridae(1),Siphoviridae(1),unclassified(2);Lambdalikevirus(1),unclassified(3);unknown(1),unclassified(3)	Bacteria(4);Proteobacteria(4);Gammaproteobacteria(4);Pasteurellales(4);Pasteurellaceae(4);Actinobacillus(1),Mannheimia(3)	extrachromosomal(4)	linear (4)	VirSorter(4)	41
Cluster_349	4	4	hallmark(4)	Viruses(4);dsDNA viruses no RNA stage(4);Caudovirales(4);Siphoviridae(4);Lambdalikevirus(4);unknown(4)	Bacteria(4);Proteobacteria(4);Alphaproteobacteria(4);Rhizobiales(4);Rhizobiaceae(4);Sinorhizobium(4)	prophage(1),extrachromosomal(3)	linear (4)	VirSorter(4)	78
Cluster_340	4	4	hallmark(4),phage(2)	Viruses(4);dsDNA viruses no RNA stage(4);Caudovirales(4);Siphoviridae(4);unknown(4);unknown(4)	Bacteria(4);Firmicutes(4);Negativicutes(4);Selenomonadales(4);Veillonellaceae(4);Dialister(1),Veillonella(3)	extrachromosomal(4)	linear (4)	VirSorter(4)	59
Cluster_386	4	0	NCBI_RefSeq(4)	Viruses(4);dsDNA viruses no RNA stage(4);Caudovirales(2);Myoviridae(2)	Bacteria(4);Proteobacteria(4);Gammaproteobacteria(4);Vibrionales(4);Vibrionaceae(4);Vibrio(4)	complete(4)	-	RefSeq(4)
Cluster_413	3	3	hallmark(3),phage(3)	Viruses(3);dsDNA viruses no RNA stage(3);Caudovirales(3);Siphoviridae(3);unclassified(1),unknown(2);unknown(3)	Bacteria(3);Firmicutes(3);Clostridia(3);Clostridiales(3);Clostridiaceae(3);Clostridium(3)	extrachromosomal(3)	linear (3)	VirSorter(3)	55
Cluster_453	3	2	hallmark(2),NCBI_RefSeq(1),noncaudo(2)	Viruses(3);dsDNA viruses no RNA stage(3);(1),unknown(2);Corticoviridae(3);Corticovirus(3);unknown(2)	Bacteria(3);Proteobacteria(3);Gammaproteobacteria(3);Alteromonadales(3);Pseudoalteromonadaceae(3);unknown(1),Pseudoalteromonas(2)	prophppppge(2),complete(1)	linear (2)	RefSeq(1),VirSorter(2)	19
Cluster_436	3	3	hallmark(3)	Viruses(3);dsDNA viruses no RNA stage(3);Caudovirales(3);Siphoviridae(3);Lambdalikevirus(3);unknown(3)	Bacteria(3);Proteobacteria(3);Alphaproteobacteria(3);Rhodobacterales(1),Rhizobiales(2);Rhodobacteraceae(1),Rhizobiaceae(2);Phaeobacter(1),Sinorhizobium(2)	extrachromosomal(3)	linear (3)	VirSorter(3)	55
Cluster_418	3	3	hallmark(3),noncaudo(3)	Viruses(3);ssDNA viruses(3);unknown(3);Inoviridae(3);Inovirus(3);unknown(3)	Bacteria(3);Proteobacteria(3);Gammaproteobacteria(3);Xanthomonadales(3);Xanthomonadaceae(3);Xylella(3)	prophage(3)	linear (3)	VirSorter(3)	28
Cluster_459	3	3	hallmark(3),phage(1)	Viruses(3);dsDNA viruses no RNA stage(3);Caudovirales(3);Siphoviridae(3);Lambdalikevirus(1),unknown(2);unknown(3)	Bacteria(3);Firmicutes(3);unknown(1),Clostridia(2);unknown(1),Clostridiales(2);unknown(1),Clostridiaceae(2);unknown(1),Clostridium(2)	extrachromosomal(3)	linear (3)	VirSorter(3)	38
Cluster_434	3	0	NCBI_RefSeq(3)	Viruses(3);dsDNA viruses no RNA stage(3);Caudovirales(3);Podoviridae(3)	Bacteria(3);Proteobacteria(3);Gammaproteobacteria(3);Aeromonadales(1),Enterobacteriales(2);Aeromonadaceae(1),Enterobacteriaceae(2);Cronobacter(1),Yersinia(1),Aeromonas(1)	complete(3)	-	RefSeq(3)
Cluster_412	3	3	hallmark(3),phage(3)	Viruses(3);dsDNA viruses no RNA stage(3);Caudovirales(3);Siphoviridae(3);unclassified(3);unknown(3)	Bacteria(3);Firmicutes(3);Bacilli(3);Bacillales(3);Listeriaceae(3);Listeria(3)	prophage(3)	linear (3)	VirSorter(3)	69
Cluster_433	3	0	NCBI_RefSeq(3)	Viruses(3);dsDNA viruses no RNA stage(3);Caudovirales(3);Siphoviridae(3)	Bacteria(3);Actinobacteria(3);Actinobacteria(3);Actinomycetales(3);Gordoniaceae(1),Mycobacteriaceae(2);Gordonia(1),Mycobacterium(2)	complete(3)	-	RefSeq(3)
Cluster_447	3	0	NCBI_RefSeq(3)	Viruses(3);dsDNA viruses no RNA stage(3);Caudovirales(3);Myoviridae(3);Phikzlikevirus(2)	unknown(1),Bacteria(2);Proteobacteria(2);Gammaproteobacteria(2);Pseudomonadales(2);Pseudomonadaceae(2);Pseudomonas(2)	complete(3)	-	RefSeq(3)
Cluster_419	3	3	hallmark(3),phage(1)	Viruses(3);dsDNA viruses no RNA stage(3);Caudovirales(3);Siphoviridae(1),unclassified(2);Lambdalikevirus(1),unclassified(2);unknown(1),unclassified(2)	Bacteria(3);Proteobacteria(3);Gammaproteobacteria(3);Vibrionales(3);Vibrionaceae(3);Vibrio(3)	prophage(1),extrachromosomal(2)	linear (3)	VirSorter(3)	57
Cluster_398	3	3	phage(3)	Viruses(3);dsDNA viruses no RNA stage(3);Caudovirales(3);Siphoviridae(3);unclassified(3);unclassified(3)	Bacteria(3);Proteobacteria(3);Gammaproteobacteria(3);Enterobacteriales(3);Enterobacteriaceae(3);Escherichia(3)	extrachromosomal(3)	linear (3)	VirSorter(3)	35
Cluster_461	3	3	hallmark(3)	Viruses(3);dsDNA viruses no RNA stage(3);Caudovirales(3);Podoviridae(3);unknown(3);unknown(3)	Bacteria(3);Omnitrophica(3);unknown(3);unknown(3);unknown(3);unknown(3)	extrachromosomal(3)	linear (3)	VirSorter(3)	49
Cluster_411	3	0	NCBI_RefSeq(3)	Viruses(3);dsDNA viruses no RNA stage(3);Caudovirales(3);Siphoviridae(3);Phic3unalikevirus(2)	Bacteria(3);Actinobacteria(3);Actinobacteria(3);Actinomycetales(3);Streptomycetaceae(3);unknown(1),Streptomyces(2)	complete(3)	-	RefSeq(3)
Cluster_458	3	0	NCBI_RefSeq(3)	Viruses(3);dsDNA viruses no RNA stage(3);Caudovirales(3);Siphoviridae(3);C2likevirus(2)	Bacteria(3);Firmicutes(3);Bacilli(3);Lactobacillales(3);Streptococcaceae(3);unknown(1),Lactococcus(2)	complete(3)	-	RefSeq(3)
Cluster_467	3	2	hallmark(2),NCBI_RefSeq(1)	Viruses(3);dsDNA viruses no RNA stage(3);Caudovirales(3);Myoviridae(1),Siphoviridae(2);unclassified(1),Punalikevirus(1);unknown(2)	Bacteria(3);Actinobacteria(1),Firmicutes(2);Clostridia(1),Bacilli(1),Actinobacteria(1);Thermoanaerobacterales(1),Actinomycetales(1),Bacillales(1);Alicyclobacillaceae(1),Thermoanaerobacterales Family III. Incertae Sedis(1),Pseudonocardiaceae(1);Thermoanaerobacterium(1),Amycolatopsis(1),Alicyclobacillus(1)	complete(1),extrachromosomal(2)	linear (2)	RefSeq(1),VirSorter(2)	66
Cluster_406	3	3	hallmark(3)	Viruses(3);dsDNA viruses no RNA stage(3);Caudovirales(3);Siphoviridae(3);unknown(1),unclassified(2);unknown(3)	Bacteria(3);Firmicutes(3);Clostridia(3);Clostridiales(3);Peptostreptococcaceae(3);unknown(3)	extrachromosomal(3)	linear (3)	VirSorter(3)	25
Cluster_425	3	3	hallmark(2),phage(3)	Viruses(3);dsDNA viruses no RNA stage(3);Caudovirales(3);Siphoviridae(3);unclassified(1),Lambdalikevirus(2);unknown(3)	Bacteria(3);Proteobacteria(3);Gammaproteobacteria(3);unknown(1),Pseudomonadales(2);unknown(1),Pseudomonadaceae(2);unknown(1),Pseudomonas(2)	extrachromosomal(3)	linear (3)	VirSorter(3)	23
Cluster_469	3	3	hallmark(3)	Viruses(3);dsDNA viruses no RNA stage(3);Caudovirales(3);Siphoviridae(3);unknown(3);unknown(3)	Bacteria(3);Firmicutes(3);Bacilli(3);Lactobacillales(3);Streptococcaceae(3);Streptococcus(3)	extrachromosomal(3)	linear (3)	VirSorter(3)	20
Cluster_448	3	0	NCBI_RefSeq(3)	Viruses(3);dsDNA viruses no RNA stage(3);Caudovirales(3);Myoviridae(3)	Bacteria(3);Proteobacteria(3);Betaproteobacteria(1),Gammaproteobacteria(2);Burkholderiales(1),Pseudomonadales(2);Burkholderiaceae(1),Pseudomonadaceae(2);Ralstonia(1),Pseudomonas(2)	complete(3)	-	RefSeq(3)
Cluster_435	3	0	NCBI_RefSeq(3)	Viruses(3);dsDNA viruses no RNA stage(3);Caudovirales(2);Podoviridae(2);N4likevirus(2)	Bacteria(3);Proteobacteria(3);Alphaproteobacteria(3);Rhodobacterales(3);Rhodobacteraceae(3);Ruegeria(1),Sulfitobacter(1),unknown(1)	complete(3)	-	RefSeq(3)
Cluster_423	3	3	hallmark(3),phage(1)	Viruses(3);dsDNA viruses no RNA stage(3);Caudovirales(3);Siphoviridae(3);unknown(3);unknown(3)	Bacteria(3);Firmicutes(3);Bacilli(3);Bacillales(3);Bacillaceae(3);Bacillus(3)	extrachromosomal(3)	circular (1) linear (2)	VirSorter(3)	72
Cluster_399	3	3	hallmark(3),vdb(1),phage(3)	Viruses(3);dsDNA viruses no RNA stage(3);Caudovirales(3);Siphoviridae(3);unclassified(3);unknown(3)	Bacteria(3);Firmicutes(3);Bacilli(3);Lactobacillales(3);Lactobacillaceae(3);Lactobacillus(3)	prophage(2),extrachromosomal(1)	linear (3)	VirSorter(3)	47
Cluster_396	3	3	hallmark(3),phage(3)	Viruses(3);dsDNA viruses no RNA stage(3);Caudovirales(3);unclassified(1),Siphoviridae(1),Myoviridae(1);unknown(1),unclassified(2);unclassified(1),unknown(2)	Bacteria(3);Firmicutes(3);Clostridia(3);Clostridiales(3);Peptostreptococcaceae(3);unknown(3)	prophage(1),extrachromosomal(2)	linear (3)	VirSorter(3)	57
Cluster_452	3	3	hallmark(3),vdb(1),phage(2)	Viruses(3);dsDNA viruses no RNA stage(3);Caudovirales(3);unclassified(1),Siphoviridae(2);(1),unknown(2);unclassified(1),unknown(2)	Bacteria(3);Firmicutes(3);Clostridia(3);Clostridiales(3);Ruminococcaceae(1),Clostridiaceae(2);Ruminococcus(1),Clostridium(2)	prophage(1),extrachromosomal(2)	linear (3)	VirSorter(3)	61
Cluster_400	3	3	hallmark(3),phage(3)	Viruses(3);dsDNA viruses no RNA stage(3);Caudovirales(3);Siphoviridae(3);unclassified(3);unknown(3)	Bacteria(3);Firmicutes(3);Bacilli(3);Lactobacillales(3);Enterococcaceae(3);Enterococcus(3)	prophage(3)	linear (3)	VirSorter(3)	44
Cluster_464	3	0	NCBI_RefSeq(3)	Viruses(3);dsDNA viruses no RNA stage(3);Caudovirales(3);Siphoviridae(3)	Bacteria(3);Bacteroidetes(3);Flavobacteriia(3);Flavobacteriales(3);Flavobacteriaceae(3);Cellulophaga(3)	complete(3)	-	RefSeq(3)
Cluster_404	3	3	hallmark(1),phage(3)	Viruses(3);dsDNA viruses no RNA stage(3);Caudovirales(3);Myoviridae(3);unknown(3);unknown(3)	Bacteria(3);Firmicutes(3);Clostridia(3);Clostridiales(3);Peptostreptococcaceae(3);unknown(3)	extrachromosomal(3)	linear (3)	VirSorter(3)	20
Cluster_451	3	0	NCBI_RefSeq(3)	Viruses(3);dsDNA viruses no RNA stage(3);Caudovirales(3);Myoviridae(3)	Bacteria(3);Proteobacteria(3);Gammaproteobacteria(3);Enterobacteriales(3);Enterobacteriaceae(3);Escherichia(3)	complete(3)	-	RefSeq(3)
Cluster_407	3	3	hallmark(2),vdb(1),phage(3)	Viruses(3);dsDNA viruses no RNA stage(3);Caudovirales(3);unclassified(1),Myoviridae(2);unclassified(1),T4likevirus(2);unknown(3)	Bacteria(3);Firmicutes(3);Bacilli(3);Bacillales(3);Bacillaceae(3);Bacillus(3)	prophage(1),extrachromosomal(2)	circular (1) linear (2)	VirSorter(3)	99
Cluster_440	3	2	hallmark(2),NCBI_RefSeq(1),refseq(1)	Viruses(3);dsDNA viruses no RNA stage(3);Caudovirales(3);Siphoviridae(3);Lambdalikevirus(2);unknown(2)	Bacteria(3);Firmicutes(1),Bacteroidetes(2);Bacteroidia(1),Flavobacteriia(1),Negativicutes(1);Selenomonadales(1),Flavobacteriales(1),Bacteroidales(1);Acidaminococcaceae(1),Flavobacteriaceae(1),Prevotellaceae(1);Cellulophaga(1),Prevotella(1),Phascolarctobacterium(1)	complete(1),extrachromosomal(2)	linear (2)	RefSeq(1),VirSorter(2)	30
Cluster_410	3	3	hallmark(3),phage(3)	Viruses(3);dsDNA viruses no RNA stage(3);Caudovirales(3);Siphoviridae(3);unclassified(3);unclassified(3)	Bacteria(3);Proteobacteria(3);Gammaproteobacteria(3);Enterobacteriales(3);Enterobacteriaceae(3);Klebsiella(3)	extrachromosomal(3)	linear (3)	VirSorter(3)	30
Cluster_416	3	3	hallmark(3),vdb(3),noncaudo(3)	Viruses(3);ssDNA viruses(3);unknown(3);Inoviridae(3);Inovirus(3);unknown(3)	Bacteria(3);Proteobacteria(3);Gammaproteobacteria(3);Pseudomonadales(3);Moraxellaceae(3);Acinetobacter(3)	prophage(3)	linear (3)	VirSorter(3)	15
Cluster_397	3	3	phage(3)	Viruses(3);dsDNA viruses no RNA stage(3);Caudovirales(3);Myoviridae(1),unclassified(2);unknown(1),unclassified(2);unknown(3)	Bacteria(3);Firmicutes(3);Clostridia(3);Clostridiales(3);Peptostreptococcaceae(3);unknown(3)	extrachromosomal(3)	linear (3)	VirSorter(3)	34
Cluster_424	3	3	hallmark(3),phage(3)	Viruses(3);dsDNA viruses no RNA stage(3);Caudovirales(3);Siphoviridae(3);unclassified(3);unknown(3)	Bacteria(3);Firmicutes(3);Clostridia(3);Clostridiales(3);Peptostreptococcaceae(3);unknown(3)	prophage(2),extrachromosomal(1)	linear (3)	VirSorter(3)	56
Cluster_457	3	2	NCBI_RefSeq(1),refseq(2)	Viruses(3);dsDNA viruses no RNA stage(3);Caudovirales(3);Siphoviridae(3);unknown(1),unclassified(1);unknown(2)	Bacteria(3);Actinobacteria(3);Actinobacteria(3);Actinomycetales(3);Streptomycetaceae(3);Streptomyces(3)	complete(1),extrachromosomal(2)	linear (2)	RefSeq(1),VirSorter(2)	35
Cluster_421	3	3	hallmark(3),phage(2)	Viruses(3);dsDNA viruses no RNA stage(3);Caudovirales(3);Siphoviridae(3);unclassified(1),unknown(2);unknown(3)	Bacteria(3);Actinobacteria(3);Actinobacteria(3);Bifidobacteriales(3);Bifidobacteriaceae(3);Alloscardovia(1),Bifidobacterium(2)	prophage(1),extrachromosomal(2)	circular (1) linear (2)	VirSorter(3)	66
Cluster_456	3	0	NCBI_RefSeq(3)	Viruses(3);dsDNA viruses no RNA stage(3);Caudovirales(3);Podoviridae(3)	Bacteria(3);Cyanobacteria(3);unknown(3);Oscillatoriales(3);unknown(3);Leptolyngbya(1),unknown(2)	complete(3)	-	RefSeq(3)
Cluster_409	3	2	NCBI_RefSeq(1),refseq(2)	Viruses(3);dsDNA viruses no RNA stage(3);Caudovirales(3);Siphoviridae(3);unclassified(2);unknown(2)	Bacteria(3);Firmicutes(3);Bacilli(3);Lactobacillales(3);Streptococcaceae(1),Enterococcaceae(2);Lactococcus(1),Enterococcus(2)	complete(1),extrachromosomal(2)	circular (2)	RefSeq(1),VirSorter(2)	60
Cluster_408	3	3	hallmark(3),vdb(2),phage(3)	Viruses(3);dsDNA viruses no RNA stage(3);Caudovirales(3);Siphoviridae(3);Lambdalikevirus(3);unknown(3)	Bacteria(3);Firmicutes(3);Clostridia(3);Clostridiales(3);Ruminococcaceae(1),Clostridiaceae(2);Ruminococcus(1),Clostridium(2)	prophage(3)	linear (3)	VirSorter(3)	64
Cluster_463	3	3	noncaudo(1),phage(2)	Viruses(3);dsDNA viruses no RNA stage(3);Caudovirales(3);unclassified(3);(3);unclassified(3)	Bacteria(3);Proteobacteria(3);Betaproteobacteria(3);Burkholderiales(3);Burkholderiaceae(3);Burkholderia(3)	prophage(1),extrachromosomal(2)	linear (3)	VirSorter(3)	14
Cluster_450	3	0	NCBI_RefSeq(3)	Viruses(3);ssDNA viruses(3);(3);Microviridae(3);Microvirus(3)	Bacteria(3);Proteobacteria(3);Gammaproteobacteria(3);Enterobacteriales(3);Enterobacteriaceae(3);Escherichia(3)	complete(3)	-	RefSeq(3)
Cluster_446	3	3	hallmark(3),phage(3)	Viruses(3);dsDNA viruses no RNA stage(3);Caudovirales(3);Siphoviridae(3);L5likevirus(1),unknown(2);unknown(3)	Bacteria(3);Actinobacteria(3);Actinobacteria(3);Actinomycetales(3);Gordoniaceae(1),Corynebacteriaceae(2);Gordonia(1),Corynebacterium(2)	extrachromosomal(3)	linear (3)	VirSorter(3)	80
Cluster_422	3	3	hallmark(1),vdb(1),phage(3)	Viruses(3);dsDNA viruses no RNA stage(1),unclassified phages(2);Caudovirales(1),(2);Siphoviridae(1),(2);unknown(3);unknown(3)	Bacteria(3);Firmicutes(3);Bacilli(3);Lactobacillales(3);Streptococcaceae(3);Streptococcus(3)	extrachromosomal(3)	linear (3)	VirSorter(3)	21
Cluster_417	3	3	noncaudo(3)	Viruses(3);ssDNA viruses(3);unknown(3);Inoviridae(3);Inovirus(3);unknown(3)	Bacteria(3);Proteobacteria(3);Gammaproteobacteria(3);Pseudomonadales(3);Moraxellaceae(3);Acinetobacter(3)	prophage(1),extrachromosomal(2)	circular (1) linear (2)	VirSorter(3)	12
Cluster_402	3	3	hallmark(3)	Viruses(3);dsDNA viruses no RNA stage(3);Caudovirales(3);Myoviridae(3);unknown(1),Hpunalikevirus(2);unknown(3)	Bacteria(3);Proteobacteria(3);Epsilonproteobacteria(3);Campylobacterales(3);Campylobacteraceae(3);Campylobacter(3)	extrachromosomal(3)	linear (3)	VirSorter(3)	22
Cluster_427	3	3	phage(3)	Viruses(3);dsDNA viruses no RNA stage(3);Caudovirales(3);Siphoviridae(3);unclassified(3);unclassified(3)	Bacteria(3);Proteobacteria(3);Gammaproteobacteria(3);Enterobacteriales(3);Enterobacteriaceae(3);Klebsiella(3)	extrachromosomal(3)	linear (3)	VirSorter(3)	13
Cluster_415	3	3	hallmark(3),vdb(1)	Viruses(3);dsDNA viruses no RNA stage(3);Caudovirales(3);Myoviridae(3);Mulikevirus(3);unknown(3)	Bacteria(3);Proteobacteria(3);Gammaproteobacteria(3);Pseudomonadales(3);Pseudomonadaceae(3);Pseudomonas(3)	extrachromosomal(3)	linear (3)	VirSorter(3)	109
Cluster_442	3	3	noncaudo(3)	Viruses(3);ssDNA viruses(3);unknown(3);unknown(3);unknown(3);unknown(3)	Archaea(3);Euryarchaeota(3);Halobacteria(3);Halobacteriales(3);Halobacteriaceae(3);Halorubrum(3)	prophage(3)	linear (3)	VirSorter(3)	24
Cluster_466	3	0	NCBI_RefSeq(3)	Viruses(3);dsDNA viruses no RNA stage(3)	Archaea(3);Euryarchaeota(3);Halobacteria(3);Halobacteriales(3);Halobacteriaceae(3);Haloarcula(3)	complete(3)	-	RefSeq(3)
Cluster_455	3	1	hallmark(1),NCBI_RefSeq(2)	Viruses(3);dsDNA viruses no RNA stage(3);Caudovirales(1);unclassified(1);unclassified(1);unknown(1)	Bacteria(3);Proteobacteria(3);Alphaproteobacteria(3);Caulobacterales(1),Rhodobacterales(2);Caulobacteraceae(1),Rhodobacteraceae(2);Caulobacter(1),unknown(2)	prophppppge(1),complete(2)	linear (1)	RefSeq(2),VirSorter(1)	77
Cluster_439	3	3	hallmark(3),phage(3)	Viruses(3);unclassified(3);unclassified(3);unclassified(3);unclassified(3);unknown(3)	Bacteria(3);Firmicutes(3);Bacilli(3);Bacillales(3);Bacillaceae(3);Bacillus(3)	extrachromosomal(3)	linear (3)	VirSorter(3)	32
Cluster_441	3	0	NCBI_RefSeq(3)	Viruses(3);unclassified phages(1),dsDNA viruses no RNA stage(2);Caudovirales(2);Siphoviridae(2)	Bacteria(3);Firmicutes(3);Bacilli(3);Bacillales(3);Listeriaceae(3);unknown(1),Listeria(2)	complete(3)	-	RefSeq(3)
Cluster_445	3	3	hallmark(3),phage(3)	Viruses(3);dsDNA viruses no RNA stage(3);Caudovirales(3);unclassified(1),Siphoviridae(2);unknown(1),unclassified(2);unknown(3)	Bacteria(3);Actinobacteria(3);Actinobacteria(3);Actinomycetales(3);Nocardiaceae(1),Corynebacteriaceae(2);Rhodococcus(1),Corynebacterium(2)	extrachromosomal(3)	circular (1) linear (2)	VirSorter(3)	73
Cluster_420	3	3	phage(3)	Viruses(3);dsDNA viruses no RNA stage(3);Caudovirales(3);Siphoviridae(3);unknown(3);unknown(3)	Bacteria(3);Firmicutes(3);Bacilli(3);Lactobacillales(3);Lactobacillaceae(3);Lactobacillus(3)	extrachromosomal(3)	linear (3)	VirSorter(3)	30
Cluster_403	3	3	hallmark(3),phage(3)	Viruses(3);dsDNA viruses no RNA stage(3);Caudovirales(3);unclassified(1),Myoviridae(2);unknown(1),unclassified(2);unknown(3)	Bacteria(3);Proteobacteria(3);Gammaproteobacteria(3);Pasteurellales(3);Pasteurellaceae(3);Gallibacterium(1),Haemophilus(2)	extrachromosomal(3)	linear (3)	VirSorter(3)	35
Cluster_428	3	3	phage(3)	Viruses(3);unclassified(1),dsDNA viruses no RNA stage(2);unclassified(1),Caudovirales(2);unclassified(1),Siphoviridae(2);Spbetalikevirus(1),unclassified(2);unknown(1),unclassified(2)	Bacteria(3);Proteobacteria(3);Gammaproteobacteria(3);Enterobacteriales(3);Enterobacteriaceae(3);Salmonella(3)	extrachromosomal(3)	linear (3)	VirSorter(3)	16
Cluster_460	3	0	NCBI_RefSeq(3)	Viruses(3);dsDNA viruses no RNA stage(3);Caudovirales(3);Siphoviridae(3)	Bacteria(3);Actinobacteria(3);Actinobacteria(3);Actinomycetales(3);Mycobacteriaceae(3);unknown(1),Mycobacterium(2)	complete(3)	-	RefSeq(3)
Cluster_429	3	3	hallmark(3),vdb(2),phage(3)	Viruses(3);dsDNA viruses no RNA stage(3);Caudovirales(3);Siphoviridae(3);Lambdalikevirus(3);unknown(3)	Bacteria(3);Firmicutes(1),Fusobacteria(2);Negativicutes(1),Fusobacteriia(2);Selenomonadales(1),Fusobacteriales(2);Veillonellaceae(1),Fusobacteriaceae(2);Veillonella(1),Fusobacterium(2)	prophage(1),extrachromosomal(2)	linear (3)	VirSorter(3)	50
Cluster_444	3	0	NCBI_RefSeq(3)	Viruses(3);dsDNA viruses no RNA stage(3);Caudovirales(3);Siphoviridae(3)	Bacteria(3);Bacteroidetes(3);Flavobacteriia(3);Flavobacteriales(3);Flavobacteriaceae(3);Flavobacterium(1),Cellulophaga(2)	complete(3)	-	RefSeq(3)
Cluster_431	3	0	NCBI_RefSeq(3)	Viruses(3);dsDNA viruses no RNA stage(3);Caudovirales(3);Siphoviridae(3)	Bacteria(3);Actinobacteria(3);Actinobacteria(3);Actinomycetales(3);Mycobacteriaceae(3);unknown(1),Mycobacterium(2)	complete(3)	-	RefSeq(3)
Cluster_438	3	0	NCBI_RefSeq(3)	Viruses(3);unclassified phages(1),dsDNA viruses no RNA stage(2);Caudovirales(2);Podoviridae(1);Phieco32likevirus(1)	Bacteria(3);Proteobacteria(3);Gammaproteobacteria(3);Enterobacteriales(3);Enterobacteriaceae(3);Escherichia(3)	complete(3)	-	RefSeq(3)
Cluster_430	3	0	NCBI_RefSeq(3)	Viruses(3);dsDNA viruses no RNA stage(3);Caudovirales(3);Siphoviridae(3)	Bacteria(3);Actinobacteria(3);Actinobacteria(3);Actinomycetales(3);Mycobacteriaceae(3);unknown(1),Mycobacterium(2)	complete(3)	-	RefSeq(3)
Cluster_401	3	1	hallmark(1),NCBI_RefSeq(2),refseq(1)	Viruses(3);dsDNA viruses no RNA stage(3);Caudovirales(3);unclassified(1),Siphoviridae(2);unclassified(1);unknown(1)	Bacteria(3);Firmicutes(3);Bacilli(3);Lactobacillales(3);Lactobacillaceae(3);Lactobacillus(3)	prophppppge(1),complete(2)	linear (1)	RefSeq(2),VirSorter(1)	19
Cluster_449	3	0	NCBI_RefSeq(3)	Viruses(3);dsDNA viruses no RNA stage(3);Caudovirales(3);Siphoviridae(3)	Bacteria(3);Actinobacteria(3);Actinobacteria(3);Actinomycetales(3);Mycobacteriaceae(3);Mycobacterium(3)	complete(3)	-	RefSeq(3)
Cluster_454	3	2	hallmark(2),NCBI_RefSeq(1),refseq(2)	Viruses(3);dsDNA viruses no RNA stage(3);Caudovirales(3);Podoviridae(3);unknown(1),unclassified(1);unknown(2)	Bacteria(3);Proteobacteria(3);Alphaproteobacteria(1),Betaproteobacteria(1),Deltaproteobacteria(1);Myxococcales(1),Rhizobiales(1),Burkholderiales(1);Rhizobiaceae(1),Burkholderiaceae(1),Myxococcaceae(1);Burkholderia(1),Rhizobium(1),Myxococcus(1)	prophppppge(2),complete(1)	linear (2)	RefSeq(1),VirSorter(2)	61
Cluster_443	3	0	NCBI_RefSeq(3)	Viruses(3);dsDNA viruses no RNA stage(3);Caudovirales(3);Podoviridae(3)	Bacteria(3);Bacteroidetes(3);Flavobacteriia(3);Flavobacteriales(3);Flavobacteriaceae(3);Cellulophaga(3)	complete(3)	-	RefSeq(3)
Cluster_414	3	3	hallmark(1),noncaudo(3)	Viruses(3);ssDNA viruses(3);unknown(3);Inoviridae(3);Inovirus(3);unknown(3)	Bacteria(3);Proteobacteria(3);Gammaproteobacteria(3);Pseudomonadales(3);Pseudomonadaceae(3);Pseudomonas(3)	prophage(3)	linear (3)	VirSorter(3)	16
Cluster_465	3	0	NCBI_RefSeq(3)	Viruses(3);dsDNA viruses no RNA stage(3);(3);Bicaudaviridae(3);Bicaudavirus(1)	Archaea(3);Crenarchaeota(3);Thermoprotei(3);Sulfolobales(3);Sulfolobaceae(3);Acidianus(1),unknown(1),Sulfolobus(1)	complete(3)	-	RefSeq(3)
Cluster_426	3	3	hallmark(3),vdb(1),phage(2)	Viruses(3);dsDNA viruses no RNA stage(3);Caudovirales(3);Siphoviridae(3);unclassified(1),Lambdalikevirus(2);unknown(3)	Bacteria(3);Actinobacteria(1),Firmicutes(2);Actinobacteria(1),Clostridia(2);Coriobacteriales(1),Clostridiales(2);Lachnospiraceae(1),Coriobacteriaceae(1),Clostridiaceae(1);Dorea(1),Clostridium(1),Collinsella(1)	prophage(1),extrachromosomal(2)	linear (3)	VirSorter(3)	34
Cluster_405	3	3	hallmark(2),phage(3)	Viruses(3);dsDNA viruses no RNA stage(3);Caudovirales(3);unclassified(1),Siphoviridae(2);(1),unclassified(1),Lambdalikevirus(1);unclassified(1),unknown(2)	Bacteria(3);Proteobacteria(3);Gammaproteobacteria(3);Pseudomonadales(3);Pseudomonadaceae(3);Pseudomonas(3)	extrachromosomal(3)	linear (3)	VirSorter(3)	80
Cluster_432	3	3	hallmark(3),phage(2)	Viruses(3);dsDNA viruses no RNA stage(3);Caudovirales(3);unclassified(1),Siphoviridae(2);unclassified(1),unknown(2);unknown(3)	Bacteria(3);Proteobacteria(3);Alphaproteobacteria(3);Sphingomonadales(1),Rhizobiales(2);Sphingomonadaceae(1),Rhizobiaceae(2);Sphingomonas(1),Sinorhizobium(2)	prophage(1),extrachromosomal(2)	linear (3)	VirSorter(3)	43
Cluster_462	3	0	NCBI_RefSeq(3)	Viruses(3);dsDNA viruses no RNA stage(3)	Archaea(3);Euryarchaeota(3);Halobacteria(3);Halobacteriales(3);Halobacteriaceae(3);Haloarcula(3)	complete(3)	-	RefSeq(3)
Cluster_437	3	0	NCBI_RefSeq(3)	Viruses(3);dsDNA viruses no RNA stage(3);Caudovirales(3);Siphoviridae(1),Podoviridae(2)	Bacteria(3);Proteobacteria(3);Gammaproteobacteria(3);Alteromonadales(1),Enterobacteriales(2);Colwelliaceae(1),Enterobacteriaceae(2);unknown(1),Erwinia(2)	complete(3)	-	RefSeq(3)
Cluster_468	3	3	hallmark(3)	Viruses(3);dsDNA viruses no RNA stage(3);Caudovirales(3);unclassified(1),Myoviridae(1),Podoviridae(1);(1),unknown(2);unknown(3)	Bacteria(3);Bacteroidetes(3);Bacteroidia(3);Bacteroidales(3);Bacteroidaceae(1),Prevotellaceae(2);Bacteroides(1),Prevotella(2)	extrachromosomal(3)	linear (3)	VirSorter(3)	47
Cluster_531	2	2	hallmark(2)	Viruses(2);dsDNA viruses no RNA stage(2);Caudovirales(2);unclassified(1),Myoviridae(1);unclassified(1),unknown(1);unknown(2)	Bacteria(2);Proteobacteria(2);Alphaproteobacteria(2);unknown(1),Sphingomonadales(1);Sphingomonadaceae(1),unknown(1);unknown(1),Sphingobium(1)	extrachromosomal(2)	linear (2)	VirSorter(2)	41
Cluster_509	2	0	NCBI_RefSeq(2)	Viruses(2);dsDNA viruses no RNA stage(2);Caudovirales(2);Siphoviridae(2)	Bacteria(2);Firmicutes(2);Bacilli(2);Lactobacillales(2);Streptococcaceae(1),Enterococcaceae(1);Streptococcus(1),Enterococcus(1)	complete(2)	-	RefSeq(2)
Cluster_523	2	2	hallmark(2),phage(2)	Viruses(2);dsDNA viruses no RNA stage(2);Caudovirales(2);Podoviridae(2);N4likevirus(2);unknown(2)	Bacteria(2);Proteobacteria(2);Gammaproteobacteria(2);Pseudomonadales(2);Moraxellaceae(2);Acinetobacter(2)	extrachromosomal(2)	linear (2)	VirSorter(2)	75
Cluster_491	2	2	hallmark(2),phage(2)	Viruses(2);dsDNA viruses no RNA stage(2);Caudovirales(2);Siphoviridae(2);unknown(2);unknown(2)	Bacteria(2);Firmicutes(2);Bacilli(2);Lactobacillales(2);Lactobacillaceae(2);Lactobacillus(2)	extrachromosomal(2)	circular (2)	VirSorter(2)	58
Cluster_574	2	2	hallmark(2),phage(2)	Viruses(2);dsDNA viruses no RNA stage(2);unknown(2);unknown(2);unknown(2);unknown(2)	Archaea(2);Euryarchaeota(2);Halobacteria(2);Halobacteriales(2);Halobacteriaceae(2);Haladaptatus(2)	prophage(1),extrachromosomal(1)	linear (2)	VirSorter(2)	81
Cluster_594	2	2	vdb(2),noncaudo(2)	Viruses(1);dsDNA viruses no RNA stage(1);Caudovirales(1);Myoviridae(1);unknown(1);unknown(1)	Bacteria(2);Proteobacteria(1),Firmicutes(1);Bacilli(1),Gammaproteobacteria(1);Bacillales(1),Pseudomonadales(1);Moraxellaceae(1),Paenibacillaceae(1);Paenibacillus(1),Acinetobacter(1)	extrachromosomal(2)	linear (2)	VirSorter(2)	12
Cluster_557	2	0	NCBI_RefSeq(2)	Viruses(2);dsDNA viruses no RNA stage(2);Caudovirales(2);Siphoviridae(2)	Bacteria(2);Cyanobacteria(2);unknown(2);Chroococcales(2);unknown(2);Synechococcus(2)	complete(2)	-	RefSeq(2)
Cluster_538	2	0	NCBI_RefSeq(2)	Viruses(2);dsDNA viruses no RNA stage(2);Caudovirales(2);Podoviridae(2)	Bacteria(2);Proteobacteria(2);Gammaproteobacteria(2);Pseudomonadales(2);Pseudomonadaceae(2);Pseudomonas(2)	complete(2)	-	RefSeq(2)
Cluster_589	2	2	noncaudo(2)	Viruses(2);dsDNA viruses no RNA stage(2);Caudovirales(2);Siphoviridae(2);unknown(2);unknown(2)	Archaea(2);Crenarchaeota(2);unknown(2);unknown(2);unknown(2);unknown(2)	prophage(2)	linear (2)	VirSorter(2)	16
Cluster_612	2	0	NCBI_RefSeq(2)	Viruses(2);ssRNA positive-strand viruses no DNA stage(2);(2);Leviviridae(2);Levivirus(2)	Bacteria(2);Proteobacteria(2);Gammaproteobacteria(2);Enterobacteriales(2);Enterobacteriaceae(2);Escherichia(2)	complete(2)	-	RefSeq(2)
Cluster_474	2	1	hallmark(1),NCBI_RefSeq(1),refseq(1)	Viruses(2);dsDNA viruses no RNA stage(2);Caudovirales(2);Siphoviridae(2);unknown(1);unknown(1)	Bacteria(2);Firmicutes(2);Bacilli(2);Lactobacillales(2);Lactobacillaceae(2);Lactobacillus(2)	prophppppge(1),complete(1)	linear (1)	RefSeq(1),VirSorter(1)	55
Cluster_471	2	2	phage(2)	Viruses(2);dsDNA viruses no RNA stage(2);Caudovirales(2);Siphoviridae(2);Spbetalikevirus(2);unknown(2)	Bacteria(2);Firmicutes(2);Bacilli(2);Bacillales(2);Staphylococcaceae(2);Staphylococcus(2)	extrachromosomal(2)	linear (2)	VirSorter(2)	20
Cluster_596	2	2	noncaudo(2)	Viruses(2);ssDNA viruses(2);unknown(2);Inoviridae(2);Inovirus(2);unknown(2)	Bacteria(2);Proteobacteria(2);Betaproteobacteria(2);Burkholderiales(2);Burkholderiaceae(2);Cupriavidus(1),Ralstonia(1)	prophage(2)	linear (2)	VirSorter(2)	15
Cluster_546	2	0	NCBI_RefSeq(2)	Viruses(2);dsDNA viruses no RNA stage(2);Caudovirales(2);Myoviridae(2)	Bacteria(2);Deinococcus-Thermus(2);Deinococci(2);Thermales(2);Thermaceae(2);Thermus(2)	complete(2)	-	RefSeq(2)
Cluster_595	2	2	noncaudo(2)	Viruses(2);dsDNA viruses no RNA stage(2);Caudovirales(2);Siphoviridae(2);unknown(2);unknown(2)	Archaea(2);Euryarchaeota(2);Halobacteria(2);Halobacteriales(2);Halobacteriaceae(2);Halobiforma(2)	extrachromosomal(2)	linear (2)	VirSorter(2)	16
Cluster_488	2	2	hallmark(2),phage(2)	Viruses(2);dsDNA viruses no RNA stage(2);Caudovirales(2);unclassified(2);unclassified(2);unknown(2)	Bacteria(2);Firmicutes(2);Clostridia(2);Clostridiales(2);Clostridiaceae(2);Clostridium(2)	prophage(1),extrachromosomal(1)	linear (2)	VirSorter(2)	55
Cluster_602	2	2	hallmark(2)	Viruses(2);dsDNA viruses no RNA stage(2);Caudovirales(2);Siphoviridae(2);unknown(1),Lambdalikevirus(1);unknown(2)	Bacteria(2);Actinobacteria(2);Actinobacteria(2);Actinomycetales(2);Streptomycetaceae(2);Streptomyces(2)	extrachromosomal(2)	linear (2)	VirSorter(2)	123
Cluster_564	2	2	phage(2)	Viruses(2);dsDNA viruses no RNA stage(2);Caudovirales(2);Myoviridae(2);T4likevirus(2);unknown(2)	Bacteria(2);Firmicutes(2);Bacilli(2);Bacillales(2);Sporolactobacillaceae(2);Sporolactobacillus(2)	extrachromosomal(2)	linear (2)	VirSorter(2)	13
Cluster_581	2	2	hallmark(2),phage(1)	Viruses(2);dsDNA viruses no RNA stage(2);Caudovirales(2);unclassified(1),Siphoviridae(1);unclassified(1),unknown(1);unknown(2)	Bacteria(2);Actinobacteria(2);Actinobacteria(2);Actinomycetales(2);Streptomycetaceae(1),Nocardiopsaceae(1);Nocardiopsis(1),Streptomyces(1)	extrachromosomal(2)	linear (2)	VirSorter(2)	118
Cluster_530	2	2	hallmark(2),phage(2)	Viruses(2);dsDNA viruses no RNA stage(2);Caudovirales(2);Siphoviridae(2);unclassified(2);unknown(2)	Bacteria(2);Firmicutes(2);Clostridia(2);Clostridiales(2);Clostridiaceae(2);Clostridium(2)	extrachromosomal(2)	linear (2)	VirSorter(2)	78
Cluster_490	2	2	hallmark(2),vdb(1),phage(1)	Viruses(2);dsDNA viruses no RNA stage(2);Caudovirales(2);Siphoviridae(1),Myoviridae(1);unknown(1),Punalikevirus(1);unknown(2)	Bacteria(2);Firmicutes(2);Clostridia(1),unknown(1);unknown(1),Clostridiales(1);Lachnospiraceae(1),unknown(1);unknown(1),Anaerostipes(1)	prophage(1),extrachromosomal(1)	linear (2)	VirSorter(2)	71
Cluster_522	2	0	NCBI_RefSeq(2)	Viruses(2);dsDNA viruses no RNA stage(2);Caudovirales(2);Myoviridae(2);Spounalikevirus(1)	Bacteria(2);Firmicutes(2);Bacilli(2);Bacillales(2);Bacillaceae(2);Bacillus(2)	complete(2)	-	RefSeq(2)
Cluster_513	2	2	hallmark(2)	Viruses(2);dsDNA viruses no RNA stage(2);Caudovirales(2);Siphoviridae(2);unclassified(1),Lambdalikevirus(1);unclassified(1),unknown(1)	Bacteria(2);Proteobacteria(2);Betaproteobacteria(2);Burkholderiales(2);Comamonadaceae(2);Curvibacter(2)	extrachromosomal(2)	linear (2)	VirSorter(2)	18
Cluster_532	2	2	noncaudo(2)	Viruses(2);ssDNA viruses(2);unknown(2);Inoviridae(2);Inovirus(2);unknown(2)	Bacteria(2);Proteobacteria(2);Gammaproteobacteria(2);Pseudomonadales(2);Pseudomonadaceae(2);Pseudomonas(2)	extrachromosomal(2)	linear (2)	VirSorter(2)	12
Cluster_515	2	0	NCBI_RefSeq(2)	Viruses(2);dsDNA viruses no RNA stage(2);Caudovirales(2);Myoviridae(2)	Bacteria(2);Proteobacteria(2);Gammaproteobacteria(2);Enterobacteriales(2);Enterobacteriaceae(2);Escherichia(1),Erwinia(1)	complete(2)	-	RefSeq(2)
Cluster_550	2	2	vdb(1),noncaudo(2)	Viruses(2);dsDNA viruses no RNA stage(2);unknown(2);Fuselloviridae(2);Alphafusellovirus(2);unknown(2)	Archaea(2);Crenarchaeota(2);Thermoprotei(2);Sulfolobales(2);Sulfolobaceae(2);Sulfolobus(2)	prophage(2)	linear (2)	VirSorter(2)	10
Cluster_610	2	2	hallmark(2)	Viruses(2);dsDNA viruses no RNA stage(2);Caudovirales(2);Siphoviridae(2);unclassified(1),Lambdalikevirus(1);unknown(1),unclassified(1)	Bacteria(2);Actinobacteria(2);Actinobacteria(2);Actinomycetales(2);Streptomycetaceae(2);Streptomyces(2)	extrachromosomal(2)	linear (2)	VirSorter(2)	48
Cluster_556	2	0	NCBI_RefSeq(2)	Viruses(2);dsDNA viruses no RNA stage(2)	Archaea(2);Euryarchaeota(2);Halobacteria(2);Halobacteriales(2);Halobacteriaceae(2);Halorubrum(2)	complete(2)	-	RefSeq(2)
Cluster_577	2	0	NCBI_RefSeq(2)	Viruses(2);dsDNA viruses no RNA stage(2);Caudovirales(2);Podoviridae(2)	Bacteria(2);Proteobacteria(2);Alphaproteobacteria(2);Rhizobiales(2);Brucellaceae(2);Brucella(2)	complete(2)	-	RefSeq(2)
Cluster_586	2	2	hallmark(2),vdb(1),noncaudo(1),phage(1)	Viruses(2);dsDNA viruses no RNA stage(2);Caudovirales(1),unknown(1);unknown(1),Siphoviridae(1);unknown(2);unknown(2)	Archaea(2);Euryarchaeota(2);Halobacteria(2);Halobacteriales(2);Halobacteriaceae(2);Natrialba(2)	prophage(1),extrachromosomal(1)	circular (1) linear (1)	VirSorter(2)	78
Cluster_524	2	0	NCBI_RefSeq(2)	Viruses(2);dsDNA viruses no RNA stage(2);Caudovirales(2);Myoviridae(2)	Bacteria(2);Proteobacteria(2);Gammaproteobacteria(2);Enterobacteriales(2);Enterobacteriaceae(2);Escherichia(1),unknown(1)	complete(2)	-	RefSeq(2)
Cluster_498	2	2	hallmark(2),phage(1)	Viruses(2);dsDNA viruses no RNA stage(2);Caudovirales(2);Siphoviridae(2);unclassified(1),Lambdalikevirus(1);unknown(2)	Bacteria(2);Proteobacteria(2);Gammaproteobacteria(2);Xanthomonadales(2);Xanthomonadaceae(2);Xanthomonas(2)	extrachromosomal(2)	linear (2)	VirSorter(2)	35
Cluster_539	2	2	hallmark(2),phage(2)	Viruses(2);dsDNA viruses no RNA stage(2);Caudovirales(2);unclassified(1),Siphoviridae(1);unknown(2);unknown(2)	Bacteria(2);Actinobacteria(2);Actinobacteria(2);Actinomycetales(2);Streptomycetaceae(2);Streptomyces(2)	extrachromosomal(2)	linear (2)	VirSorter(2)	100
Cluster_476	2	2	hallmark(2),phage(2)	Viruses(2);dsDNA viruses no RNA stage(2);Caudovirales(2);Myoviridae(2);unclassified(2);unknown(2)	Bacteria(2);Proteobacteria(2);Gammaproteobacteria(2);Pseudomonadales(2);Pseudomonadaceae(2);Pseudomonas(2)	extrachromosomal(2)	linear (2)	VirSorter(2)	24
Cluster_499	2	2	hallmark(1),phage(2)	Viruses(2);dsDNA viruses no RNA stage(2);Caudovirales(2);Siphoviridae(2);unknown(2);unknown(2)	Bacteria(2);Actinobacteria(2);Actinobacteria(2);Actinomycetales(2);Mycobacteriaceae(2);Mycobacterium(2)	extrachromosomal(2)	linear (2)	VirSorter(2)	42
Cluster_502	2	2	hallmark(2)	Viruses(2);dsDNA viruses no RNA stage(2);Caudovirales(2);Siphoviridae(2);Tunalikevirus(2);unknown(2)	Bacteria(2);Bacteroidetes(2);Bacteroidia(2);Bacteroidales(2);Porphyromonadaceae(2);Dysgonomonas(2)	extrachromosomal(2)	linear (2)	VirSorter(2)	62
Cluster_483	2	2	hallmark(2),phage(2)	Viruses(2);dsDNA viruses no RNA stage(2);Caudovirales(2);Siphoviridae(2);unclassified(1),unknown(1);unknown(2)	Bacteria(2);Proteobacteria(2);Gammaproteobacteria(2);Enterobacteriales(2);Enterobacteriaceae(2);Escherichia(2)	extrachromosomal(2)	linear (2)	VirSorter(2)	40
Cluster_605	2	2	phage(2)	Viruses(2);dsDNA viruses no RNA stage(2);Caudovirales(2);Myoviridae(2);unknown(2);unknown(2)	Bacteria(2);Proteobacteria(2);Epsilonproteobacteria(2);Campylobacterales(2);Campylobacteraceae(2);Campylobacter(2)	extrachromosomal(2)	linear (2)	VirSorter(2)	16
Cluster_580	2	2	hallmark(2)	Viruses(2);dsDNA viruses no RNA stage(2);Caudovirales(2);unclassified(2);unclassified(2);unknown(2)	Bacteria(2);Firmicutes(2);Clostridia(2);Clostridiales(2);Oscillospiraceae(2);Oscillibacter(2)	extrachromosomal(2)	circular (1) linear (1)	VirSorter(2)	11
Cluster_548	2	0	NCBI_RefSeq(2)	Viruses(2);dsDNA viruses no RNA stage(2);Caudovirales(2);Myoviridae(2)	Bacteria(2);Proteobacteria(2);Gammaproteobacteria(2);Enterobacteriales(2);Enterobacteriaceae(2);Erwinia(2)	complete(2)	-	RefSeq(2)
Cluster_514	2	0	NCBI_RefSeq(2)	Viruses(2);dsDNA viruses no RNA stage(2);Caudovirales(2)	Bacteria(2);Firmicutes(2);Bacilli(2);Bacillales(2);Bacillaceae(2);Bacillus(2)	complete(2)	-	RefSeq(2)
Cluster_493	2	2	phage(2)	Viruses(2);dsDNA viruses no RNA stage(2);Caudovirales(2);unclassified(2);unclassified(2);unclassified(2)	Bacteria(2);Proteobacteria(2);Gammaproteobacteria(2);Enterobacteriales(2);Enterobacteriaceae(2);Escherichia(2)	extrachromosomal(2)	linear (2)	VirSorter(2)	26
Cluster_607	2	2	noncaudo(2)	Viruses(2);dsDNA viruses no RNA stage(2);Caudovirales(2);Siphoviridae(2);Lambdalikevirus(2);unknown(2)	Bacteria(2);Proteobacteria(2);Gammaproteobacteria(2);Vibrionales(2);Vibrionaceae(2);Vibrio(2)	prophage(2)	linear (2)	VirSorter(2)	17
Cluster_504	2	2	phage(2)	Viruses(2);dsDNA viruses no RNA stage(2);Caudovirales(2);Myoviridae(2);unknown(2);unknown(2)	Bacteria(2);Proteobacteria(2);Gammaproteobacteria(2);Enterobacteriales(2);Enterobacteriaceae(2);Escherichia(2)	extrachromosomal(2)	linear (2)	VirSorter(2)	24
Cluster_601	2	2	hallmark(2),vdb(2)	Viruses(2);dsDNA viruses no RNA stage(2);Caudovirales(2);Siphoviridae(2);unclassified(2);unknown(2)	Bacteria(2);Chloroflexi(2);unknown(2);unknown(2);unknown(2);unknown(2)	extrachromosomal(2)	linear (2)	VirSorter(2)	18
Cluster_473	2	1	hallmark(1),NCBI_RefSeq(1),refseq(1)	Viruses(2);dsDNA viruses no RNA stage(2);Caudovirales(2);Siphoviridae(2);unknown(1);unknown(1)	Bacteria(2);Firmicutes(2);Bacilli(2);Lactobacillales(2);Lactobacillaceae(2);Lactobacillus(2)	complete(1),extrachromosomal(1)	linear (1)	RefSeq(1),VirSorter(1)	62
Cluster_518	2	2	hallmark(2)	Viruses(2);dsDNA viruses no RNA stage(2);Caudovirales(2);Myoviridae(1),Siphoviridae(1);unclassified(1),T4likevirus(1);unknown(2)	Bacteria(2);Proteobacteria(2);Gammaproteobacteria(2);Enterobacteriales(2);Enterobacteriaceae(2);Salmonella(1),Pectobacterium(1)	prophage(1),extrachromosomal(1)	linear (2)	VirSorter(2)	39
Cluster_598	2	1	hallmark(1),NCBI_RefSeq(1),refseq(1)	Viruses(2);dsDNA viruses no RNA stage(1),unclassified phages(1);Caudovirales(1);Siphoviridae(1);unknown(1);unknown(1)	Bacteria(2);Actinobacteria(2);Actinobacteria(2);Actinomycetales(2);Nocardiaceae(2);Rhodococcus(2)	complete(1),extrachromosomal(1)	linear (1)	RefSeq(1),VirSorter(1)	59
Cluster_555	2	2	hallmark(2),phage(2)	Viruses(2);dsDNA viruses no RNA stage(2);unclassified(2);unclassified(2);unknown(1),unclassified(1);unknown(2)	Archaea(2);Euryarchaeota(2);Halobacteria(2);Halobacteriales(2);Halobacteriaceae(2);Natronorubrum(2)	prophage(2)	linear (2)	VirSorter(2)	84
Cluster_525	2	2	hallmark(2),phage(2)	Viruses(2);dsDNA viruses no RNA stage(2);Caudovirales(2);Siphoviridae(2);Phic3unalikevirus(1),unclassified(1);unknown(2)	Bacteria(2);Actinobacteria(2);Actinobacteria(2);Actinomycetales(2);Streptomycetaceae(2);Streptomyces(2)	prophage(1),extrachromosomal(1)	linear (2)	VirSorter(2)	17
Cluster_608	2	2	hallmark(2),phage(1)	Viruses(2);dsDNA viruses no RNA stage(2);Caudovirales(2);Siphoviridae(1),Podoviridae(1);unknown(2);unknown(2)	Bacteria(2);Bacteroidetes(1),Verrucomicrobia(1);unknown(1),Flavobacteriia(1);Flavobacteriales(1),unknown(1);Flavobacteriaceae(1),unknown(1);unknown(1),Flavobacterium(1)	extrachromosomal(2)	linear (2)	VirSorter(2)	49
Cluster_562	2	0	NCBI_RefSeq(2)	Viruses(2);dsDNA viruses no RNA stage(2);(1);Rudiviridae(1);Rudivirus(1)	Archaea(2);Crenarchaeota(2);Thermoprotei(2);Sulfolobales(2);Sulfolobaceae(2);Sulfolobus(2)	complete(2)	-	RefSeq(2)
Cluster_575	2	2	hallmark(2),phage(2)	Viruses(2);dsDNA viruses no RNA stage(2);unknown(2);unknown(2);unknown(2);unknown(2)	Archaea(2);Euryarchaeota(2);Halobacteria(2);Halobacteriales(2);Halobacteriaceae(2);Halobiforma(2)	prophage(2)	linear (2)	VirSorter(2)	27
Cluster_501	2	0	NCBI_RefSeq(2)	Viruses(2);dsDNA viruses no RNA stage(2);Caudovirales(2);Myoviridae(2)	Bacteria(2);Proteobacteria(2);Gammaproteobacteria(2);Enterobacteriales(2);Enterobacteriaceae(2);Cronobacter(1),Klebsiella(1)	complete(2)	-	RefSeq(2)
Cluster_486	2	2	hallmark(2)	Viruses(2);dsDNA viruses no RNA stage(2);Caudovirales(2);Siphoviridae(2);unknown(1),unclassified(1);unknown(2)	Bacteria(2);Firmicutes(2);Negativicutes(2);Selenomonadales(2);Veillonellaceae(2);Megasphaera(2)	extrachromosomal(2)	linear (2)	VirSorter(2)	97
Cluster_484	2	2	hallmark(1),phage(2)	Viruses(2);dsDNA viruses no RNA stage(2);Caudovirales(2);Siphoviridae(1),Podoviridae(1);unknown(1),Lambdalikevirus(1);unknown(2)	Bacteria(2);Proteobacteria(2);Betaproteobacteria(2);Burkholderiales(2);Burkholderiaceae(2);Burkholderia(2)	prophage(1),extrachromosomal(1)	linear (2)	VirSorter(2)	66
Cluster_475	2	2	hallmark(2),phage(2)	Viruses(2);dsDNA viruses no RNA stage(2);Caudovirales(2);Siphoviridae(2);unknown(1),Lambdalikevirus(1);unknown(2)	Bacteria(2);Firmicutes(2);Bacilli(2);Lactobacillales(2);Streptococcaceae(2);Lactococcus(2)	extrachromosomal(2)	linear (2)	VirSorter(2)	12
Cluster_569	2	2	hallmark(2),phage(2)	Viruses(2);dsDNA viruses no RNA stage(2);Caudovirales(2);Siphoviridae(2);unknown(2);unknown(2)	Bacteria(2);Firmicutes(2);Negativicutes(2);Selenomonadales(2);Veillonellaceae(2);Pelosinus(2)	extrachromosomal(2)	linear (2)	VirSorter(2)	45
Cluster_540	2	0	NCBI_RefSeq(2)	Viruses(2);dsDNA viruses no RNA stage(2);Caudovirales(2);Siphoviridae(2)	Bacteria(2);Cyanobacteria(2);unknown(2);Prochlorales(1),Chroococcales(1);Prochlorococcaceae(1),unknown(1);Prochlorococcus(1),Synechococcus(1)	complete(2)	-	RefSeq(2)
Cluster_481	2	2	hallmark(2),phage(1)	Viruses(2);unclassified(1),dsDNA viruses no RNA stage(1);Caudovirales(1),unclassified(1);unclassified(2);unclassified(2);unknown(1),unclassified(1)	Bacteria(2);Proteobacteria(2);Gammaproteobacteria(2);Enterobacteriales(2);Enterobacteriaceae(2);Escherichia(2)	extrachromosomal(2)	linear (2)	VirSorter(2)	57
Cluster_511	2	2	phage(2)	Viruses(2);dsDNA viruses no RNA stage(2);Caudovirales(2);Myoviridae(2);unknown(2);unknown(2)	Bacteria(2);Firmicutes(2);Clostridia(2);Clostridiales(2);Peptostreptococcaceae(2);unknown(2)	extrachromosomal(2)	linear (2)	VirSorter(2)	17
Cluster_554	2	2	hallmark(2)	Viruses(2);dsDNA viruses no RNA stage(2);Caudovirales(2);Podoviridae(2);unknown(2);unknown(2)	Bacteria(2);Proteobacteria(2);Epsilonproteobacteria(2);Campylobacterales(2);Campylobacteraceae(2);Campylobacter(2)	extrachromosomal(2)	linear (2)	VirSorter(2)	40
Cluster_597	2	2	hallmark(2),phage(1)	Viruses(2);dsDNA viruses no RNA stage(2);Caudovirales(2);unclassified(1),Siphoviridae(1);unclassified(2);unknown(2)	Bacteria(2);Actinobacteria(2);Actinobacteria(2);Bifidobacteriales(2);Bifidobacteriaceae(2);Bifidobacterium(2)	extrachromosomal(2)	circular (1) linear (1)	VirSorter(2)	97
Cluster_588	2	0	NCBI_RefSeq(2)	Viruses(2);dsDNA viruses no RNA stage(2);Caudovirales(2);Siphoviridae(1),Myoviridae(1)	Bacteria(2);Proteobacteria(2);Gammaproteobacteria(2);Enterobacteriales(2);Enterobacteriaceae(2);Cronobacter(1),Erwinia(1)	complete(2)	-	RefSeq(2)
Cluster_604	2	0	NCBI_RefSeq(2)	Viruses(2);dsRNA viruses(2);(2);Cystoviridae(2);Cystovirus(1)	Bacteria(2);Proteobacteria(2);Gammaproteobacteria(2);Pseudomonadales(2);Pseudomonadaceae(2);Pseudomonas(2)	complete(2)	-	RefSeq(2)
Cluster_497	2	2	hallmark(2),vdb(2),noncaudo(2)	Viruses(2);ssDNA viruses(2);unknown(2);Inoviridae(2);Inovirus(2);unknown(2)	Bacteria(2);Proteobacteria(2);Gammaproteobacteria(2);Pseudomonadales(2);Moraxellaceae(2);Acinetobacter(2)	prophage(2)	linear (2)	VirSorter(2)	15
Cluster_545	2	2	hallmark(2),vdb(2)	Viruses(2);dsDNA viruses no RNA stage(2);Caudovirales(2);unclassified(2);unclassified(2);unclassified(2)	Bacteria(2);Cyanobacteria(2);unknown(2);Chroococcales(2);unknown(2);Crocosphaera(2)	extrachromosomal(2)	linear (2)	VirSorter(2)	22
Cluster_611	2	0	NCBI_RefSeq(2)	Viruses(2);dsDNA viruses no RNA stage(2);(2);Globuloviridae(2);Globulovirus(2)	Archaea(2);Crenarchaeota(2);Thermoprotei(2);Thermoproteales(2);Thermoproteaceae(2);Thermoproteus(2)	complete(2)	-	RefSeq(2)
Cluster_485	2	2	hallmark(2),phage(2)	Viruses(2);dsDNA viruses no RNA stage(2);Caudovirales(2);Siphoviridae(2);unknown(2);unknown(2)	Bacteria(2);Proteobacteria(2);Gammaproteobacteria(2);Pseudomonadales(2);Moraxellaceae(2);Acinetobacter(2)	extrachromosomal(2)	linear (2)	VirSorter(2)	28
Cluster_563	2	2	hallmark(2),phage(1)	Viruses(2);dsDNA viruses no RNA stage(2);Caudovirales(2);Podoviridae(2);unclassified(2);unknown(2)	Bacteria(2);Proteobacteria(2);Alphaproteobacteria(2);Rhizobiales(2);Rhizobiaceae(2);Sinorhizobium(1),Agrobacterium(1)	prophage(1),extrachromosomal(1)	linear (2)	VirSorter(2)	42
Cluster_492	2	2	hallmark(2),vdb(1),phage(2)	Viruses(2);dsDNA viruses no RNA stage(2);Caudovirales(2);Siphoviridae(2);C2likevirus(2);unknown(2)	Bacteria(2);Firmicutes(2);Bacilli(2);Lactobacillales(2);Enterococcaceae(2);Enterococcus(2)	prophage(2)	linear (2)	VirSorter(2)	60
Cluster_533	2	2	hallmark(2),phage(2)	Viruses(2);dsDNA viruses no RNA stage(2);Caudovirales(2);Myoviridae(1),Siphoviridae(1);unknown(1),Punalikevirus(1);unknown(2)	Bacteria(2);Firmicutes(2);Clostridia(2);Clostridiales(2);Ruminococcaceae(1),Clostridiaceae(1);Faecalibacterium(1),Clostridium(1)	extrachromosomal(2)	linear (2)	VirSorter(2)	107
Cluster_547	2	2	hallmark(2)	Viruses(2);dsDNA viruses no RNA stage(2);Caudovirales(2);Podoviridae(2);unknown(2);unknown(2)	Bacteria(2);Proteobacteria(2);Alphaproteobacteria(1),Gammaproteobacteria(1);Alteromonadales(1),Sphingomonadales(1);Sphingomonadaceae(1),Alteromonadaceae(1);Marinobacter(1),Sphingomonas(1)	extrachromosomal(2)	circular (1) linear (1)	VirSorter(2)	70
Cluster_503	2	2	hallmark(2),phage(2)	Viruses(2);dsDNA viruses no RNA stage(2);Caudovirales(2);unclassified(2);unclassified(2);unknown(2)	Bacteria(2);Proteobacteria(2);Gammaproteobacteria(2);Enterobacteriales(2);Enterobacteriaceae(2);Escherichia(2)	prophage(2)	linear (2)	VirSorter(2)	20
Cluster_591	2	2	hallmark(2)	Viruses(2);dsDNA viruses no RNA stage(2);Caudovirales(2);unclassified(1),Podoviridae(1);unclassified(1),unknown(1);unknown(2)	Bacteria(2);Firmicutes(2);unknown(2);unknown(2);unknown(2);unknown(2)	prophage(2)	linear (2)	VirSorter(2)	50
Cluster_553	2	2	hallmark(2)	Viruses(2);dsDNA viruses no RNA stage(2);Caudovirales(2);unclassified(1),Podoviridae(1);(1),unclassified(1);unknown(1),unclassified(1)	Bacteria(2);Proteobacteria(2);Betaproteobacteria(2);Burkholderiales(2);Alcaligenaceae(2);Pelistega(2)	extrachromosomal(2)	linear (2)	VirSorter(2)	38
Cluster_482	2	2	hallmark(1),phage(2)	Viruses(2);dsDNA viruses no RNA stage(2);Caudovirales(2);Siphoviridae(2);Lambdalikevirus(2);unknown(2)	Bacteria(2);Proteobacteria(2);Gammaproteobacteria(2);Enterobacteriales(2);Enterobacteriaceae(2);Salmonella(2)	prophage(1),extrachromosomal(1)	linear (2)	VirSorter(2)	35
Cluster_603	2	2	hallmark(2),phage(2)	Viruses(2);dsDNA viruses no RNA stage(2);Caudovirales(2);Siphoviridae(2);unknown(2);unknown(2)	Archaea(2);Euryarchaeota(2);Halobacteria(2);Halobacteriales(2);Halobacteriaceae(2);Haloferax(2)	extrachromosomal(2)	circular (1) linear (1)	VirSorter(2)	70
Cluster_526	2	2	hallmark(2)	Viruses(2);dsDNA viruses no RNA stage(2);Caudovirales(2);Siphoviridae(2);unknown(1),Spbetalikevirus(1);unknown(2)	Bacteria(2);Firmicutes(2);Bacilli(2);Bacillales(2);Paenibacillaceae(2);Paenibacillus(1),Brevibacillus(1)	extrachromosomal(2)	linear (2)	VirSorter(2)	79
Cluster_542	2	0	NCBI_RefSeq(2)	Viruses(2);dsDNA viruses no RNA stage(2);Caudovirales(2);Myoviridae(2);Phikzlikevirus(1)	Bacteria(2);Proteobacteria(2);Gammaproteobacteria(2);Pseudomonadales(2);Pseudomonadaceae(2);Pseudomonas(2)	complete(2)	-	RefSeq(2)
Cluster_572	2	2	hallmark(2)	Viruses(2);dsDNA viruses no RNA stage(2);Caudovirales(2);unclassified(1),Podoviridae(1);(1),unclassified(1);unknown(2)	Bacteria(2);Proteobacteria(2);Gammaproteobacteria(2);Pasteurellales(2);Pasteurellaceae(2);Pasteurella(2)	extrachromosomal(2)	linear (2)	VirSorter(2)	15
Cluster_506	2	2	hallmark(2)	Viruses(2);dsDNA viruses no RNA stage(2);Caudovirales(2);unclassified(2);(2);unclassified(2)	Bacteria(2);Proteobacteria(2);Gammaproteobacteria(2);Pseudomonadales(2);Moraxellaceae(2);Acinetobacter(2)	extrachromosomal(2)	circular (1) linear (1)	VirSorter(2)	108
Cluster_512	2	2	hallmark(2),vdb(1),phage(1)	Viruses(2);dsDNA viruses no RNA stage(2);Caudovirales(2);Siphoviridae(2);Lambdalikevirus(2);unknown(2)	Bacteria(2);Firmicutes(2);unknown(2);unknown(2);unknown(2);unknown(2)	extrachromosomal(2)	linear (2)	VirSorter(2)	22
Cluster_489	2	2	hallmark(1),vdb(1),phage(2)	Viruses(2);dsDNA viruses no RNA stage(2);Caudovirales(2);Siphoviridae(2);unknown(1),Spbetalikevirus(1);unknown(2)	Bacteria(2);Firmicutes(2);Bacilli(2);Bacillales(2);Paenibacillaceae(2);Paenibacillus(2)	prophage(2)	linear (2)	VirSorter(2)	86
Cluster_517	2	2	hallmark(2),phage(2)	Viruses(2);dsDNA viruses no RNA stage(2);Caudovirales(2);unclassified(2);unclassified(2);unclassified(2)	Bacteria(2);Proteobacteria(2);Alphaproteobacteria(2);Rhizobiales(2);Bradyrhizobiaceae(1),Phyllobacteriaceae(1);Mesorhizobium(1),Bradyrhizobium(1)	extrachromosomal(2)	linear (2)	VirSorter(2)	117
Cluster_567	2	2	hallmark(2),phage(2)	Viruses(2);dsDNA viruses no RNA stage(2);Caudovirales(2);Siphoviridae(2);unknown(1),unclassified(1);unknown(2)	Bacteria(2);Actinobacteria(2);Actinobacteria(2);Actinomycetales(2);Mycobacteriaceae(2);Mycobacterium(2)	extrachromosomal(2)	linear (2)	VirSorter(2)	22
Cluster_561	2	2	hallmark(1),phage(1)	Viruses(2);dsDNA viruses no RNA stage(2);Caudovirales(2);unclassified(2);(1),unclassified(1);unclassified(1),unknown(1)	Bacteria(2);Cyanobacteria(1),Proteobacteria(1);Gammaproteobacteria(1),unknown(1);Oscillatoriales(1),Enterobacteriales(1);Enterobacteriaceae(1),unknown(1);Leptolyngbya(1),Pantoea(1)	prophage(1),extrachromosomal(1)	linear (2)	VirSorter(2)	33
Cluster_478	2	2	hallmark(1),phage(2)	Viruses(2);dsDNA viruses no RNA stage(2);Caudovirales(2);Myoviridae(2);unknown(2);unknown(2)	Bacteria(2);Firmicutes(2);Clostridia(2);Clostridiales(2);Peptostreptococcaceae(2);unknown(2)	extrachromosomal(2)	linear (2)	VirSorter(2)	18
Cluster_480	2	2	hallmark(2),phage(2)	Viruses(2);dsDNA viruses no RNA stage(2);Caudovirales(2);unclassified(2);unclassified(2);unknown(2)	Bacteria(2);Firmicutes(2);Clostridia(1),unknown(1);unknown(1),Clostridiales(1);unknown(1),Clostridiaceae(1);Clostridium(1),unknown(1)	prophage(2)	linear (2)	VirSorter(2)	23
Cluster_573	2	0	NCBI_RefSeq(2)	Viruses(2);dsDNA viruses no RNA stage(2);Caudovirales(2);Podoviridae(2)	Bacteria(2);Proteobacteria(2);Gammaproteobacteria(2);Vibrionales(2);Vibrionaceae(2);Vibrio(2)	complete(2)	-	RefSeq(2)
Cluster_496	2	2	hallmark(2)	Viruses(2);dsDNA viruses no RNA stage(2);Caudovirales(2);Siphoviridae(2);Lambdalikevirus(2);unknown(2)	Bacteria(2);Proteobacteria(2);Gammaproteobacteria(2);Pseudomonadales(2);Moraxellaceae(2);Acinetobacter(2)	extrachromosomal(2)	linear (2)	VirSorter(2)	23
Cluster_578	2	2	noncaudo(2)	Viruses(2);ssDNA viruses(2);unknown(2);Inoviridae(2);unknown(2);unknown(2)	Bacteria(2);Proteobacteria(2);Gammaproteobacteria(2);Xanthomonadales(2);Xanthomonadaceae(2);Stenotrophomonas(2)	prophage(2)	linear (2)	VirSorter(2)	20
Cluster_470	2	2	hallmark(1),phage(2)	Viruses(2);dsDNA viruses no RNA stage(2);Caudovirales(2);Myoviridae(2);unknown(2);unknown(2)	Bacteria(2);Firmicutes(2);Clostridia(2);Clostridiales(2);Peptostreptococcaceae(2);unknown(2)	prophage(1),extrachromosomal(1)	linear (2)	VirSorter(2)	42
Cluster_477	2	2	phage(2)	Viruses(2);dsDNA viruses no RNA stage(2);Caudovirales(2);unclassified(2);unclassified(2);unclassified(2)	Bacteria(2);Proteobacteria(2);Gammaproteobacteria(2);Enterobacteriales(2);Enterobacteriaceae(2);Escherichia(2)	extrachromosomal(2)	linear (2)	VirSorter(2)	21
Cluster_544	2	2	hallmark(2)	Viruses(2);dsDNA viruses no RNA stage(2);Caudovirales(2);Siphoviridae(2);Lambdalikevirus(2);unknown(2)	Bacteria(2);Actinobacteria(2);Actinobacteria(2);Actinomycetales(2);Micrococcaceae(2);Micrococcus(2)	extrachromosomal(2)	linear (2)	VirSorter(2)	55
Cluster_534	2	0	NCBI_RefSeq(2)	Viruses(2);dsDNA viruses no RNA stage(2);Caudovirales(1)	Bacteria(2);Cyanobacteria(2);unknown(2);Prochlorales(1),Chroococcales(1);Prochlorococcaceae(1),unknown(1);Prochlorococcus(1),Synechococcus(1)	complete(2)	-	RefSeq(2)
Cluster_552	2	0	NCBI_RefSeq(2)	Viruses(2);dsRNA viruses(2);(2);Cystoviridae(2)	Bacteria(2);Proteobacteria(2);Gammaproteobacteria(2);Pseudomonadales(2);Pseudomonadaceae(2);Pseudomonas(2)	complete(2)	-	RefSeq(2)
Cluster_519	2	2	hallmark(2),phage(2)	Viruses(2);dsDNA viruses no RNA stage(2);Caudovirales(2);Podoviridae(2);(1),unclassified(1);unknown(2)	Bacteria(2);Proteobacteria(2);Gammaproteobacteria(2);Pseudomonadales(2);Moraxellaceae(2);Acinetobacter(2)	prophage(1),extrachromosomal(1)	linear (2)	VirSorter(2)	75
Cluster_609	2	0	NCBI_RefSeq(2)	Viruses(2);dsDNA viruses no RNA stage(2);Caudovirales(2);Siphoviridae(2)	Bacteria(2);Deinococcus-Thermus(2);Deinococci(2);Thermales(2);Thermaceae(2);Thermus(2)	complete(2)	-	RefSeq(2)
Cluster_599	2	2	hallmark(2)	Viruses(2);dsDNA viruses no RNA stage(2);Caudovirales(2);Siphoviridae(1),Myoviridae(1);unknown(1),T4likevirus(1);unknown(2)	Bacteria(2);Bacteroidetes(2);Sphingobacteriia(1),unknown(1);unknown(1),Sphingobacteriales(1);Sphingobacteriaceae(1),unknown(1);unknown(1),Sphingobacterium(1)	extrachromosomal(2)	linear (2)	VirSorter(2)	27
Cluster_494	2	0	NCBI_RefSeq(2)	Viruses(2);dsDNA viruses no RNA stage(2);Caudovirales(1);Myoviridae(1)	Bacteria(2);Cyanobacteria(2);unknown(2);Prochlorales(2);Prochlorococcaceae(2);unknown(2)	complete(2)	-	RefSeq(2)
Cluster_527	2	2	hallmark(1),noncaudo(2)	Viruses(2);ssDNA viruses(2);unknown(2);Inoviridae(2);Inovirus(2);unknown(2)	Bacteria(2);Proteobacteria(2);Gammaproteobacteria(2);Oceanospirillales(2);Halomonadaceae(2);Kushneria(1),Halomonas(1)	prophage(2)	linear (2)	VirSorter(2)	14
Cluster_508	2	2	hallmark(2),phage(1)	Viruses(2);dsDNA viruses no RNA stage(2);Caudovirales(2);Siphoviridae(2);unknown(2);unknown(2)	Bacteria(2);Actinobacteria(2);Actinobacteria(2);Bifidobacteriales(2);Bifidobacteriaceae(2);Gardnerella(2)	extrachromosomal(2)	linear (2)	VirSorter(2)	20
Cluster_613	2	0	NCBI_RefSeq(2)	Viruses(2);dsDNA viruses no RNA stage(1),unclassified phages(1)	Bacteria(2);Tenericutes(2);Mollicutes(2);Mycoplasmatales(2);Mycoplasmataceae(2);Mycoplasma(2)	complete(2)	-	RefSeq(2)
Cluster_495	2	2	hallmark(1),vdb(1),phage(2)	Viruses(2);dsDNA viruses no RNA stage(2);Caudovirales(2);unclassified(2);unclassified(2);unknown(1),unclassified(1)	Bacteria(2);Firmicutes(2);Clostridia(2);Clostridiales(2);Oscillospiraceae(1),unknown(1);Oscillibacter(1),Flavonifractor(1)	extrachromosomal(2)	linear (2)	VirSorter(2)	118
Cluster_568	2	0	NCBI_RefSeq(2)	Viruses(2);ssDNA viruses(2);(2);Microviridae(2)	Bacteria(2);Bacteroidetes(2);Flavobacteriia(2);Flavobacteriales(2);Flavobacteriaceae(2);Cellulophaga(2)	complete(2)	-	RefSeq(2)
Cluster_560	2	2	vdb(1),noncaudo(2)	Viruses(2);ssDNA viruses(2);unknown(2);Inoviridae(2);Inovirus(2);unknown(2)	Bacteria(2);Proteobacteria(2);Gammaproteobacteria(2);Alteromonadales(2);Pseudoalteromonadaceae(2);Pseudoalteromonas(2)	prophage(2)	linear (2)	VirSorter(2)	17
Cluster_543	2	2	noncaudo(2)	Viruses(2);ssDNA viruses(2);unknown(2);Inoviridae(2);Inovirus(2);unknown(2)	Bacteria(2);Proteobacteria(2);Betaproteobacteria(2);Burkholderiales(2);Burkholderiaceae(2);Ralstonia(2)	prophage(2)	linear (2)	VirSorter(2)	13
Cluster_565	2	2	hallmark(2)	Viruses(2);dsDNA viruses no RNA stage(2);Caudovirales(2);Siphoviridae(2);unknown(2);unknown(2)	Bacteria(2);Firmicutes(2);Bacilli(2);Lactobacillales(2);Lactobacillaceae(2);Lactobacillus(2)	extrachromosomal(2)	linear (2)	VirSorter(2)	78
Cluster_583	2	2	hallmark(2)	Viruses(2);dsDNA viruses no RNA stage(2);Caudovirales(2);Siphoviridae(2);unknown(2);unknown(2)	Bacteria(2);Bacteroidetes(2);Bacteroidia(2);Bacteroidales(2);Porphyromonadaceae(2);Dysgonomonas(2)	extrachromosomal(2)	linear (2)	VirSorter(2)	30
Cluster_472	2	2	hallmark(2),vdb(2),phage(2)	Viruses(2);dsDNA viruses no RNA stage(2);Caudovirales(2);Siphoviridae(2);unclassified(2);unknown(2)	Bacteria(2);Firmicutes(2);Bacilli(2);Lactobacillales(2);Enterococcaceae(2);Enterococcus(2)	prophage(2)	linear (2)	VirSorter(2)	59
Cluster_500	2	2	hallmark(1),vdb(2),phage(1)	Viruses(2);dsDNA viruses no RNA stage(1),unclassified(1);Caudovirales(1),unclassified(1);unclassified(1),Siphoviridae(1);unclassified(1),Lambdalikevirus(1);unknown(2)	Bacteria(2);Firmicutes(2);Clostridia(1),Bacilli(1);Lactobacillales(1),Clostridiales(1);Streptococcaceae(1),Clostridiaceae(1);Clostridium(1),Streptococcus(1)	extrachromosomal(2)	linear (2)	VirSorter(2)	47
Cluster_487	2	2	hallmark(2),phage(2)	Viruses(2);dsDNA viruses no RNA stage(2);Caudovirales(2);Siphoviridae(2);unknown(2);unknown(2)	Bacteria(2);Firmicutes(2);Bacilli(2);Lactobacillales(2);Streptococcaceae(2);Streptococcus(2)	prophage(2)	linear (2)	VirSorter(2)	37
Cluster_576	2	2	hallmark(2)	Viruses(2);dsDNA viruses no RNA stage(2);Caudovirales(2);Siphoviridae(2);Lambdalikevirus(2);unknown(2)	Bacteria(2);Actinobacteria(2);Actinobacteria(2);Coriobacteriales(2);Coriobacteriaceae(2);unknown(1),Collinsella(1)	prophage(2)	linear (2)	VirSorter(2)	35
Cluster_505	2	2	phage(2)	Viruses(2);dsDNA viruses no RNA stage(2);unknown(2);Fuselloviridae(2);Alphafusellovirus(2);unknown(2)	Archaea(2);Crenarchaeota(2);Thermoprotei(2);Sulfolobales(2);Sulfolobaceae(2);Sulfolobus(2)	prophage(2)	linear (2)	VirSorter(2)	61
Cluster_587	2	2	hallmark(2),phage(1)	Viruses(2);dsDNA viruses no RNA stage(2);Caudovirales(2);unclassified(2);unclassified(2);unknown(2)	Bacteria(2);Proteobacteria(2);Alphaproteobacteria(2);Rhizobiales(2);Methylobacteriaceae(2);Methylobacterium(2)	extrachromosomal(2)	linear (2)	VirSorter(2)	82
Cluster_600	2	0	NCBI_RefSeq(2)	Viruses(2);dsDNA viruses no RNA stage(1),unclassified phages(1);Caudovirales(1);Podoviridae(1)	Bacteria(2);Proteobacteria(2);Gammaproteobacteria(2);Vibrionales(1),Enterobacteriales(1);Vibrionaceae(1),Enterobacteriaceae(1);Edwardsiella(1),Vibrio(1)	complete(2)	-	RefSeq(2)
Cluster_528	2	2	hallmark(2),phage(2)	Viruses(2);dsDNA viruses no RNA stage(2);Caudovirales(2);Siphoviridae(2);Phic3unalikevirus(2);unknown(2)	Bacteria(2);Firmicutes(2);Bacilli(2);Lactobacillales(2);Lactobacillaceae(2);Lactobacillus(2)	extrachromosomal(2)	linear (2)	VirSorter(2)	15
Cluster_558	2	2	hallmark(2),vdb(1)	Viruses(2);dsDNA viruses no RNA stage(2);Caudovirales(2);Siphoviridae(1),Myoviridae(1);Lambdalikevirus(1),T4likevirus(1);unknown(2)	Bacteria(2);Cyanobacteria(2);unknown(2);Pleurocapsales(1),Chroococcales(1);unknown(2);Stanieria(1),Cyanothece(1)	extrachromosomal(2)	linear (2)	VirSorter(2)	12
Cluster_592	2	2	hallmark(2)	Viruses(2);dsDNA viruses no RNA stage(2);Caudovirales(2);Siphoviridae(2);Yualikevirus(1),unclassified(1);unknown(2)	Bacteria(2);Proteobacteria(2);Gammaproteobacteria(2);Pseudomonadales(2);Pseudomonadaceae(2);Pseudomonas(2)	extrachromosomal(2)	linear (2)	VirSorter(2)	70
Cluster_606	2	0	NCBI_RefSeq(2)	Viruses(2);ssRNA positive-strand viruses no DNA stage(2);(2);Leviviridae(2);Allolevivirus(2)	Bacteria(2);Proteobacteria(2);Gammaproteobacteria(2);Enterobacteriales(2);Enterobacteriaceae(2);Escherichia(2)	complete(2)	-	RefSeq(2)
Cluster_520	2	0	NCBI_RefSeq(2)	Viruses(2);dsRNA viruses(2);(2);Cystoviridae(2)	Bacteria(2);Proteobacteria(2);Gammaproteobacteria(2);Pseudomonadales(2);Pseudomonadaceae(2);Pseudomonas(2)	complete(2)	-	RefSeq(2)
Cluster_584	2	2	hallmark(2)	Viruses(2);dsDNA viruses no RNA stage(2);Caudovirales(2);Myoviridae(2);unknown(2);unknown(2)	Bacteria(2);Proteobacteria(2);Gammaproteobacteria(2);Enterobacteriales(2);Enterobacteriaceae(2);Salmonella(2)	extrachromosomal(2)	linear (2)	VirSorter(2)	16
Cluster_507	2	2	hallmark(2)	Viruses(2);dsDNA viruses no RNA stage(2);Caudovirales(2);unclassified(1),Myoviridae(1);unknown(1),unclassified(1);unknown(2)	Bacteria(2);Proteobacteria(2);Alphaproteobacteria(2);Rhizobiales(2);Brucellaceae(2);Ochrobactrum(2)	extrachromosomal(2)	linear (2)	VirSorter(2)	55
Cluster_551	2	2	phage(2)	Viruses(2);ssDNA viruses(2);unknown(2);Inoviridae(2);Inovirus(2);unknown(2)	Bacteria(2);Proteobacteria(2);Gammaproteobacteria(2);Vibrionales(2);Vibrionaceae(2);Vibrio(2)	extrachromosomal(2)	linear (2)	VirSorter(2)	5
Cluster_570	2	2	hallmark(2)	Viruses(2);dsDNA viruses no RNA stage(2);Caudovirales(2);Podoviridae(2);P22likevirus(2);unknown(2)	Bacteria(2);Proteobacteria(2);Alphaproteobacteria(2);Rhizobiales(1),Rhodobacterales(1);Rhizobiaceae(1),Rhodobacteraceae(1);Kaistia(1),Rhodovulum(1)	extrachromosomal(2)	circular (1) linear (1)	VirSorter(2)	62
Cluster_559	2	0	NCBI_RefSeq(2)	Viruses(2);dsDNA viruses no RNA stage(2);Caudovirales(1);Podoviridae(1)	Bacteria(2);Proteobacteria(2);Gammaproteobacteria(2);Vibrionales(1),Pseudomonadales(1);Pseudomonadaceae(1),Vibrionaceae(1);Pseudomonas(1),Salinivibrio(1)	complete(2)	-	RefSeq(2)
Cluster_535	2	2	vdb(2),phage(2)	Viruses(2);dsDNA viruses no RNA stage(2);Caudovirales(2);Myoviridae(2);unknown(2);unknown(2)	Bacteria(2);Proteobacteria(2);Deltaproteobacteria(2);Desulfovibrionales(2);Desulfovibrionaceae(2);Desulfovibrio(2)	extrachromosomal(2)	linear (2)	VirSorter(2)	15
Cluster_510	2	2	hallmark(2)	Viruses(2);dsDNA viruses no RNA stage(2);Caudovirales(2);Siphoviridae(2);unknown(1),Tunalikevirus(1);unknown(2)	Bacteria(2);Proteobacteria(2);Alphaproteobacteria(2);Rhizobiales(2);Phyllobacteriaceae(1),Bradyrhizobiaceae(1);Mesorhizobium(1),Bradyrhizobium(1)	extrachromosomal(2)	linear (2)	VirSorter(2)	14
Cluster_566	2	2	noncaudo(2)	Viruses(2);ssDNA viruses(2);unknown(2);Inoviridae(2);Inovirus(2);unknown(2)	Bacteria(2);Proteobacteria(2);Gammaproteobacteria(2);Vibrionales(2);Vibrionaceae(2);Vibrio(2)	prophage(2)	linear (2)	VirSorter(2)	10
Cluster_590	2	1	hallmark(1),NCBI_RefSeq(1),refseq(1)	Viruses(2);dsDNA viruses no RNA stage(2);Caudovirales(2);unclassified(1),Siphoviridae(1);unclassified(1);unknown(1)	Bacteria(2);Actinobacteria(2);Actinobacteria(2);Actinomycetales(2);Nocardiaceae(1),Nocardiopsaceae(1);Rhodococcus(1),Nocardiopsis(1)	complete(1),extrachromosomal(1)	linear (1)	RefSeq(1),VirSorter(1)	101
Cluster_549	2	2	hallmark(2)	Viruses(2);dsDNA viruses no RNA stage(2);Caudovirales(2);Siphoviridae(2);unclassified(2);unclassified(2)	Bacteria(2);Firmicutes(2);Negativicutes(2);Selenomonadales(2);Veillonellaceae(2);Selenomonas(2)	extrachromosomal(2)	linear (2)	VirSorter(2)	96
Cluster_479	2	2	hallmark(2),phage(2)	Viruses(2);dsDNA viruses no RNA stage(2);Caudovirales(2);Myoviridae(2);unknown(2);unknown(2)	Bacteria(2);Firmicutes(2);Clostridia(2);Clostridiales(2);Peptostreptococcaceae(2);unknown(2)	extrachromosomal(2)	linear (2)	VirSorter(2)	19
Cluster_593	2	0	NCBI_RefSeq(2)	Viruses(2);unclassified virophages(2)	Viruses(1);unknown(1);unknown(1);unknown(1);Mimiviridae(1);Mimivirus(1)	complete(2)	-	RefSeq(2)
Cluster_571	2	2	hallmark(2),vdb(1)	Viruses(2);dsDNA viruses no RNA stage(2);Caudovirales(2);unclassified(1),Siphoviridae(1);unclassified(1),Lambdalikevirus(1);unknown(2)	Bacteria(2);Proteobacteria(2);Alphaproteobacteria(2);Rhodospirillales(2);Rhodospirillaceae(2);Magnetospirillum(1),Phaeospirillum(1)	extrachromosomal(2)	linear (2)	VirSorter(2)	21
Cluster_529	2	2	hallmark(2),phage(2)	Viruses(2);dsDNA viruses no RNA stage(2);Caudovirales(2);Myoviridae(2);Punalikevirus(2);unknown(2)	Bacteria(2);Firmicutes(2);Clostridia(2);Clostridiales(2);Clostridiaceae(2);Clostridium(2)	extrachromosomal(2)	linear (2)	VirSorter(2)	33
Cluster_541	2	2	phage(2)	Viruses(2);dsDNA viruses no RNA stage(2);Caudovirales(2);Myoviridae(2);T4likevirus(2);unknown(2)	Bacteria(2);Firmicutes(2);Bacilli(2);Bacillales(2);Staphylococcaceae(2);Staphylococcus(2)	extrachromosomal(2)	linear (2)	VirSorter(2)	11
Cluster_579	2	0	NCBI_RefSeq(2)	Viruses(2);dsDNA viruses no RNA stage(2);Caudovirales(2);Siphoviridae(2)	Archaea(2);Euryarchaeota(2);Methanobacteria(2);Methanobacteriales(2);Methanobacteriaceae(2);unknown(1),Methanothermobacter(1)	complete(2)	-	RefSeq(2)
Cluster_582	2	2	hallmark(2)	Viruses(2);dsDNA viruses no RNA stage(2);Caudovirales(2);unclassified(1),Siphoviridae(1);unclassified(2);unclassified(1),unknown(1)	Bacteria(2);Actinobacteria(2);Actinobacteria(2);Actinomycetales(2);Streptomycetaceae(2);Streptomyces(2)	prophage(1),extrachromosomal(1)	linear (2)	VirSorter(2)	105
Cluster_537	2	2	hallmark(2),phage(2)	Viruses(2);dsDNA viruses no RNA stage(2);Caudovirales(2);unclassified(1),Siphoviridae(1);unclassified(1),Lambdalikevirus(1);unknown(2)	Bacteria(2);Actinobacteria(2);Actinobacteria(2);Actinomycetales(2);Mycobacteriaceae(2);Mycobacterium(2)	extrachromosomal(2)	linear (2)	VirSorter(2)	37
Cluster_521	2	2	phage(2)	Viruses(2);dsDNA viruses no RNA stage(2);Caudovirales(2);Myoviridae(2);unknown(2);unknown(2)	Bacteria(2);Proteobacteria(2);Gammaproteobacteria(2);Pseudomonadales(2);Moraxellaceae(2);Acinetobacter(2)	extrachromosomal(2)	linear (2)	VirSorter(2)	28
Cluster_536	2	0	NCBI_RefSeq(2)	Viruses(2);dsDNA viruses no RNA stage(2);Caudovirales(2);Podoviridae(2);Phieco32likevirus(1)	Bacteria(2);Proteobacteria(2);Gammaproteobacteria(2);Enterobacteriales(2);Enterobacteriaceae(2);Cronobacter(1),Salmonella(1)	complete(2)	-	RefSeq(2)
Cluster_585	2	0	NCBI_RefSeq(2)	Viruses(2);dsDNA viruses no RNA stage(2)	Bacteria(2);Deinococcus-Thermus(2);Deinococci(2);Thermales(2);Thermaceae(2);Thermus(2)	complete(2)	-	RefSeq(2)
Cluster_516	2	0	NCBI_RefSeq(2)	Viruses(2);dsDNA viruses no RNA stage(2);Caudovirales(2);Myoviridae(2)	Bacteria(2);Proteobacteria(2);Gammaproteobacteria(2);Vibrionales(2);Vibrionaceae(2);Vibrio(2)	complete(2)	-	RefSeq(2)
